# Supplementary material for: Use of probiotics to correct dysbiosis of normal microbiota following disease or disruptive events: a systematic review
Source: PubMed Central journal article supplement — BMJ Open. 2014 Aug 23;4(8):e005047. doi: 10.1136/bmjopen-2014-005047 (PMC4156804; doi:10.1136/bmjopen-2014-005047), 2014-08-23
Supplement: bmjopen-2014-005047.draft_revisions.pdf [file bmjopen-2014-005047.draft_revisions.pdf]

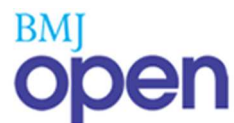

**A systematic review for evidence-based studies of probiotics supporting a health claim for microbial dysbiosis.**

|                                 |                                                                                                                                                                                                                                               |
|---------------------------------|-----------------------------------------------------------------------------------------------------------------------------------------------------------------------------------------------------------------------------------------------|
| Journal:                        | <i>BMJ Open</i>                                                                                                                                                                                                                               |
| Manuscript ID:                  | bmjopen-2014-005047                                                                                                                                                                                                                           |
| Article Type:                   | Research                                                                                                                                                                                                                                      |
| Date Submitted by the Author:   | 14-Feb-2014                                                                                                                                                                                                                                   |
| Complete List of Authors:       | McFarland, Lynne; Puget Sound VA, Health Services RandD                                                                                                                                                                                       |
| <b>Primary Subject Heading</b>: | Research methods                                                                                                                                                                                                                              |
| Secondary Subject Heading:      | Evidence based practice, Gastroenterology and hepatology, Infectious diseases, Nutrition and metabolism, Paediatrics                                                                                                                          |
| Keywords:                       | Microbiology < BASIC SCIENCES, CLINICAL PHARMACOLOGY, Adult gastroenterology < GASTROENTEROLOGY, Functional bowel disorders < GASTROENTEROLOGY, Gastrointestinal infections < GASTROENTEROLOGY, Inflammatory bowel disease < GASTROENTEROLOGY |
|                                 |                                                                                                                                                                                                                                               |

SCHOLARONE™  
Manuscripts

Peer Review Only

1  
2  
3  
4  
5  
6  
7  
8  
9  
10  
11  
12  
13  
14  
15  
16  
17  
18  
19  
20  
21  
22  
23  
24  
25  
26  
27  
28  
29  
30  
31  
32  
33  
34  
35  
36  
37  
38  
39  
40  
41  
42  
43  
44  
45  
46  
47  
48  
49  
50  
51  
52  
53  
54  
55  
56  
57  
58  
59  
60

## A systematic review for evidence-based studies of probiotics supporting a health claim for microbial dysbiosis.

Lynne V. McFarland, PhD, MS

Affiliate Associate Professor, Department of Medicinal Chemistry, School of Pharmacy,  
University of Washington, Seattle, Washington

**Corresponding author:** Lynne V. McFarland, PhD, MS

**Address:** Metropolitan Park West, 1100 Olive Way, Suite #1400, Seattle,  
WA 98101

**Telephone:** 206-277-1780

**Fax:** 206-764-2935

**E-mail address:** [LVMCFARL@u.washington.edu](mailto:LVMCFARL@u.washington.edu)

**Disclaimer:** *The findings and conclusions in this study are those of the author and do not represent the official position of the University.*

The corresponding author has the right to grant on behalf of all authors and does grant on behalf of all authors, a worldwide licence to the Publishers and its licensees in perpetuity, in all forms, formats and media (whether known now or created in the future), to i) publish, reproduce, distribute, display and store the Contribution, ii) translate the Contribution into other languages, create adaptations, reprints, include within collections and create summaries, extract and/or, abstract of the Contribution, iii) create any other derivative work(s) based on the Contribution, iv) to exploit all subsidiary rights in the Contribution, v) the inclusion of electronic links from the Contribution to third party material wherever it may be located; and vi) licence any third part to do any or all of the above.

**Word Count** 6748

**Figures:** 2

**Tables:** 4

## ABSTRACT

**Objective:** To quantify and analyse the quality of evidence for the claim that probiotics can correct dysbiosis of the normal microbiota from randomised controlled trials.

**Setting:** Systematic review of current published clinical trials of adult or pediatric patients receiving a probiotic intervention for the prevention or treatment of various diseases.

**Data sources:** Sources searched: PubMed (1985-2013), EMBASE (1985-2013), Cochrane Database of Systematic Reviews (1990-2013), CINAHL (1985-2013), AMED (1985-2013), and ISI Web of Science (2000-2013). Three on-line clinical trial registries were searched: Cochrane Central Register of Controlled trials, MetaRegister of Controlled Trials, and National Institutes of Health.

**Review methods:** Included trials were randomised evaluations of host normal microbiota embedded in trials of probiotic interventions. Studies were evaluated following PRISMA guidelines for specific probiotic strains. A standard data extraction form was used to collect the raw data. The degree of dysbiosis correction is grouped into three different outcomes (restoration, alteration or no effect) depending upon the type of study design used (Models A-C).

**Outcome measures:** The primary outcome is the degree of microbiota correction by specific probiotic strains. Secondary outcome was the association of the degree of dysbiosis correction and the strength of efficacy found in randomized controlled trials.

**Results:** 63 trials (with 69 treatment arms) are included. Complete restoration of the microbiota was found in 83% of 12 probiotic products, altered microbiota was documented in 56% of 18 probiotics and no change in microbiota was found in 79% of 19 probiotics. Clinical efficacy was associated with strains capable of restoration of the normal microbiota.

**Conclusions:** Only five (10%) of the 49 probiotic strains have evidence for normal microbiota restoration or alteration with supportive clinical efficacy trial results. The health claim for correcting dysbiosis is poorly supported for most probiotic strains and requires further research.

**Systematic review registration:** PROSPERO (CRD42014007224)

## Strengths and Limitations

### Strengths include:

- A comprehensive review of the published literature from 1985-2013
- Literature search unrestricted by language or country
- Analysis of study designs resulted in novel strategy to limit bias and classify outcomes
- Three types of outcomes of dysbiosis applied to evidence-based studies of specific probiotic strains
- Author has over 40 years of research experience in the probiotic field

### Limitations include:

- Pooled clinical trials using different study populations
- Pooled probiotic doses and regimens
- Indirect evidence linking probiotic strains and dysbiosis
- Review done by sole author

## INTRODUCTION

The popularity of probiotics has expanded exponentially recently, but along with their increased use, debate rages on how probiotics should be regulated and whether probiotics should be considered as a drug or a food supplement. In the U.S., unlike approved prescription drugs, which are regulated by the Food and Drug Administration (FDA), probiotics are typically available as over-the-counter medications or as dietary supplements and thus are limited to 'structure or function health claims' and are not permitted to claim to 'treat' or 'cure' disease. In Europe and the United Kingdom, probiotics are allowed to have 'disease or symptom claims'. These claims are required to be supported by well-conducted human trials in the targeted population or in healthy volunteers, but the European Food Safety Authority (EFSA) has rejected 80% of claims submitted to them.<sup>1-3</sup> In many cases, scientific substantiation of a specific health claim was judged insufficient or based on an indirect effect.<sup>4</sup> One such health claim made for probiotic products is that they correct dysbiosis (or the disruption of bacterial and fungal species after antibiotics or other disruptive exposures) and thus may be beneficial to maintain health. Probiotics are uniquely qualified act as temporary surrogate normal microbiota or act to protect the disrupted niche until dysbiosis is corrected. A wide variety of mechanisms-of-action have been documented for probiotics (ranging from blocking pathogen attachment sites, destruction of the pathogen by bacteriocins or proteases that degrade toxins to regulation of the immune system),<sup>5,6</sup> and while clinical evidence supports efficacy of some probiotic strains, the evidence linking these mechanisms-of-action to health claims is not as clear.

A classic example of the consequence of dysbiosis is antibiotic-associated diarrhea (AAD).<sup>7,8</sup> While antibiotics may be effective in the elimination of pathogenic organisms, a common, unintended effect is the killing or inhibition of beneficial microbes due to shared susceptibility to the antibiotic. One of the many functions for normal microbiota is the ability to resist infection by pathogenic organisms, termed 'colonization resistance'.<sup>9,10</sup> The loss of a sub-population of the normal microbiota, for example, can lead to the loss of the ability to break down fibers and starches into absorbable short chain fatty acids, resulting in high level of undigested carbohydrates, which can trigger diarrhea.<sup>11</sup> Disruption of the normal microbiota has been

1  
2  
3 shown to lead to higher rates of infections in other body systems other than the intestinal tract  
4 including the skin,<sup>12,13</sup> vagina,<sup>14,15</sup> respiratory tract,<sup>16,17</sup> and in the buccal cavity.<sup>18-20</sup>  
5  
6  
7  
8  
9

10 The challenge to proving the microbiota has been restored after a disrupting event is that it is  
11 comprised of  $>10^{13}$ - $10^{14}$  organisms and standard microbial culturing methods miss 75-95% of  
12 these organisms.<sup>21,22</sup> The development of metagenomics (cataloguing individual and disease-  
13 specific bacterial gene profiles) and the creation of the international Human Microbiome Project  
14 ushered in a new era for our understanding of the complexity of these interactions within the  
15 body.<sup>23,24</sup> This paradigm shift from culturing to metagenomic analysis has expanded our ability  
16 to document shifts in microbial populations to an unparalleled degree, but the interpretation of  
17 these shifts continues to be under debate.<sup>25-28</sup> With the advent of these newer metagenomic  
18 tools, the role of probiotics in the restoration of normal microbiota is being re-visited.<sup>29</sup>  
19  
20  
21  
22  
23  
24  
25  
26  
27  
28  
29

30 In light of new guidance documents and recommendations, the goal of this systematic review is  
31 to determine if health claims for the restoration of the normal microbiota and the correction of  
32 dysbiosis have been studied with well-designed trials and which probiotic strains have evidence-  
33 based data to support these claims.  
34  
35  
36  
37  
38

## 39 **METHODS**

### 40 **Study Objective**

41 To systematically review the literature to analyse the quality of evidence for the claim that  
42 probiotics can correct dysbiosis of the normal microbiota from randomised controlled trials.  
43  
44  
45  
46  
47  
48

### 49 **Search Strategy**

50 Search terms included: health claims for restoring normal microbiota, dysbiosis, normal  
51 microbiota, pharmacokinetics, metagenomics, probiotics, dietary supplements, randomized  
52 controlled trials and specific probiotic strains or products. Search strategies were broad-based  
53 initially, then narrowed to clinical trials with probiotics.  
54  
55  
56  
57  
58  
59  
60

## Data Sources

PubMed (1985-2013), EMBASE (1985-2013), Cochrane Database of Systematic Reviews (1990-2013), CINAHL (1985-2013), AMED (1985-2013), and ISI Web of Science (2000-2013). Three on-line clinical trial registries were searched: Cochrane Central Register of Controlled trials (<http://www.cochrane.org>), MetaRegister of Controlled Trials (<http://www.controlled-trials.com/mrct>) and National Institutes of Health (<http://www.clinicaltrials.gov>).

## Criteria for study selection and data extraction

Abstracts of all citations were reviewed and rated for inclusion for randomized controlled trials of probiotic treatments. Full articles were retrieved if normal microbiota assays were mentioned. Non-English language trials were translated and included whenever possible. Exclusion criteria included pre-clinical studies (animal models or *in vitro* assays), safety or phase 2 studies, reviews, efficacy trials with no assays for normal microbiota species, metagenomic methods only, mechanism of action of normal microbiota or probiotic, cross-sectional surveys, case reports or case series, duplicate reports, or trials of unspecified types of probiotics. All pharmacokinetic studies in humans were reviewed, as abstracts often did not include normal microbiota assay data. Data extraction and the review process followed the PRISMA statement guidelines using a 27-item checklist and flow diagram.<sup>30</sup> A standardized data extraction form was used to collect data on the probiotic (strain type, daily dose, duration), type of controls (placebo, active or no treatment), study design (status of microbiota at baseline and follow-up times), type of microbiota assay (microbial culturing, molecular biomarkers, etc.), enrolled study population (adult vs. pediatric, healthy volunteers, disease condition), type and timing of disruptive agent (antibiotics, chemotherapy, etc.), study size and attrition, outcome assessment (efficacy and/or microbiota status at end of study, adverse events) and type of health claim.

## Outcomes and definitions

The primary outcome is the degree of microbiota correction or improvement by the probiotic strain. The secondary outcome is the association of the degree of dysbiosis correction and the strength of efficacy found in randomized controlled trials of probiotic interventions. Dysbiosis is defined as an alteration or disruption of the normal microbiota (bacterial or fungal species) due

1  
2  
3 to exposure of an inciting factor (such as antibiotics, chronic disease, stress, medical procedures  
4 or medications, etc.). Included studies were required to have at least a pre-probiotic treatment  
5 assay and a post-probiotic treatment assay for normal microbiota determination. As a variety of  
6 microbial assays were available during the search period (1985-2013), we included  
7 documentation of the microbiota by either microbial cultures, or metagenomic methods [16s  
8 rRNA-targeted probes using fluorescent *in situ* hybridization (FISH) or other polymerase chain  
9 reaction (PCR) technique]<sup>8,21,28,31</sup> or by indirect methods (Nugent scores).<sup>15</sup> Nugent scores  
10 (ranged 0-10) are used to diagnose bacterial vaginosis (scores  $\geq 7$ ) or normal vaginal microbiota  
11 (scores 0-3) based on the quantitated morphotypes of small gram negative rods (*G.*  
12 *vaginalis*/*Bacteroides* spp.) and curved gram negative rods (*Mobiluncus* spp.) from gram stains  
13 of vaginal discharge smears. Microbial assays of the strain(s) contained in the probiotic product  
14 are considered as pharmacokinetic studies and were not included in the normal microbiota  
15 profiles.  
16  
17  
18  
19  
20  
21  
22  
23  
24  
25  
26  
27

28 To determine the impact on normal microbiota, only direct evidence of microbiota change  
29 (species, profiles, diversity indices, or diagnostic criteria) were included and indirect effects were  
30 excluded (changes in intestinal enzymes, short chain fatty acids, immune system parameters or  
31 disease symptoms). The degree to which dysbiosis was improved is categorized into three  
32 levels: (1) recovery of the normal microbiota back to baseline levels; (2) alteration or  
33 improvement of the normal microbiota; and (3) no change in normal microbiota. 'Recovery' of  
34 the normal microbiota is defined as a restoration of the microbiota back to a normal baseline. To  
35 determine this outcome, only those studies that enrolled subjects with undisrupted microflora at  
36 baseline and assayed subjects before a disruptive event occurred (such as antibiotic exposure or  
37 chronic disease) and compared the microbiota using another assay taken after the study  
38 intervention was completed were used, as shown in Figure 1. These types of clinical types are  
39 typically preventive probiotic interventions. This type of study design is termed 'Model A'.  
40 Recovery may be complete recovery (all assayed microbial levels returned to baseline) or  
41 incomplete recovery (partial recovery of some microbial strains, but not all returned to baseline  
42 levels). In studies enrolling subjects with dysbiosis at baseline (typically due to chronic  
43 diseases), it is not possible to show a restoration to normal microbiota levels because a normal,  
44 undisturbed microbiota was not present in these types of study subjects at the time of enrollment.  
45  
46  
47  
48  
49  
50  
51  
52  
53  
54  
55  
56  
57  
58  
59  
60



1  
2  
3 Therefore, the strongest claim possible is for an 'alteration or improvement' of the normal  
4 microbiota. To determine this outcome, studies in which the first assay occurred after a  
5 disruptive exposure (e.g., post-antibiotic exposure or during active disease) and the second assay  
6 occurred post-probiotic intervention were grouped (Model B in Figure 1). These types of studies  
7 are typically for the treatment of existing diseases by probiotics. In studies enrolling healthy  
8 subjects who had a normal microbiota at baseline and were not exposed to a disruptive factor at  
9 any time during the study intervention trial, dysbiosis did not occur. These types of clinical trials  
10 enrolled healthy volunteers and were assayed before and after the probiotic intervention was  
11 given (Model C in Figure 1). Only data from the probiotic-exposed subjects were analysed in this  
12 paper. Data from the control groups were used to confirm dysbiosis for subjects with chronic  
13 diseases or after a disruptive exposure, such as antibiotics or chemotherapy, unaffected by  
14 probiotic exposure.<sup>32-34</sup>

### 25 26 **Assessment of methodological quality**

27  
28 The GRADE (Grading of Recommendations, Assessment, Development and Evaluation) system  
29 for rating overall study quality will be used for each probiotic strain or type (single strains and  
30 mixtures of strains).<sup>35</sup> Recommendation for the support of the claim of each probiotic strain or  
31 mixture can be assessed by the overall strength of the evidence [“strong”, many randomized  
32 controlled trials show significant recovery of the microbiota, or “moderate” only one randomized  
33 controlled trial; or “weak”, only case series or reports, limited number of small trials, *etc.*].  
34 Quality of the evidence is graded as “high quality” (well-defined study design for determining  
35 restoration with normal microbiota at baseline), or “moderate quality” (disrupted microbiota at  
36 baseline), or “low quality” (no disruptive event occurred). Measurement of publication bias was  
37 not assessed for this review, as pooled outcome estimates of efficacy were not done, as typical in  
38 meta-analysis, but all studies with assays of microbiota were included to limit bias.

### 39 40 41 **Net efficacy rating**

42  
43 To determine if the ability to correct dysbiosis is associated with clinical efficacy, we reviewed  
44 the published literature for randomized controlled trials (RCTs) or meta-analyses of probiotics  
45 for various disease indications, including antibiotic associated diarrhea (AAD),<sup>5,36,37</sup> *Clostridium*  
46 *difficile* infection (CDI),<sup>5,38</sup> inflammatory bowel disease (IBD),<sup>39</sup> irritable bowel syndrome

1  
2  
3 (IBS),<sup>40</sup> traveler's diarrhea (TD),<sup>41</sup> eradication of *Helicobacter pylori* (Hp),<sup>36,37</sup> bacterial  
4 vaginosis (BV) or vaginitis,<sup>42</sup> and treatment of acute pediatric diarrhea.<sup>43-45</sup> The net rank was  
5 calculated by subtracting the number of RCTs showing non-significant or equivalent efficacy  
6 from the number of RCTs having significant efficacies. The ranks were categorized as follows:  
7 ++,  $\geq 2$  net RCTs showing significant efficacy; +, net of one RCT showing significant efficacy; 0,  
8 equal number of RCTs showing significant and non-significant efficacy results and -,  $\geq 1$   
9 negative or non-significant RCTs. Probiotics with no RCTs were not ranked.  
10  
11  
12  
13  
14  
15  
16  
17

## 18 RESULTS

19  
20 A review of the literature from 1985-2013 found 353 articles that dealt with probiotic treatments  
21 and their potential effect on normal microbiota.  
22  
23  
24  
25

### 26 Excluded studies

27  
28 As shown in Figure 2, a total of 272 articles were excluded for the following reasons: reviews  
29 (n=116), probiotic efficacy studies with no data on normal microbiota assays (n=54), animal  
30 models of probiotics and changes in microbiota (n=38), metagenomic or microbiota methods  
31 only (n=17), studies on normal microbiota but with no use of probiotics (n=14), *in vitro* assays of  
32 microbiota (n=10), or miscellaneous (n=23), which included probiotic mechanism of action  
33 studies, safety studies, duplicative reports, cross-sectional surveys and two with poorly described  
34 probiotic interventions.<sup>46,47</sup> We reviewed 81 full articles which mentioned changes in normal  
35 microbiota or indicated a health claim for probiotics and effects on normal microbiota.  
36  
37  
38  
39  
40  
41  
42  
43

44 **Probiotic pharmacokinetic studies.** . We found 18 studies reporting concentrations of probiotic  
45 strains before and post-treatment, but did not assay for other species of normal microbiota.  
46 Studies that assay for only the probiotic strain(s) that are given, and do not assay for other  
47 normal microbiota bacteria or fungi, cannot determine what impact the probiotics have on  
48 normal microbiota. While several studies using this study design claim probiotics had an impact  
49 on normal microbiota, type of data generated is pharmacokinetic behavior of the probiotics  
50 themselves and not the normal microbiota. Several studies stated that the normal microbiota was  
51 altered because an increase in various bacterial species was observed after the probiotics were  
52  
53  
54  
55  
56  
57  
58  
59  
60

1  
2  
3 given, but the species assayed were those contained in the probiotic product, so an increase is not  
4 unexpected. Pharmacokinetic studies have documented that probiotic strains taken orally can  
5 survive transit through the intestinal tract with recovery rates in feces ranging from <1% to  
6 22%.<sup>48,49</sup> These pharmacokinetic studies were excluded from this analysis, as they did not assay  
7 other types of normal microbiota not found in the probiotic product.  
8  
9  
10  
11  
12

### 13 14 **Included studies**

15  
16 Of the 63 included clinical trials, five trials had multiple treatment arms, which resulted in a total  
17 of 68 treatment arms for analysis. Engelbrekton et al. tested a mixture of 5 probiotic strains in  
18 volunteers exposed to antibiotics and also tested a mixture of 4 probiotic strains in healthy  
19 volunteers with no antibiotic exposure.<sup>50</sup> Zoppi et al. had eight different treatment arms in his  
20 study, and we included four treatment arms in our analysis [*Saccharomyces boulardii* (*S.*  
21 *boulardii*) alone and *Lactobacillus* (*L.*) *rhamnosus* GG alone], a mixture of two probiotics (*L.*  
22 *acidophilus* and *Bifido. bifidum*) and a mixture of three probiotic strains (*L. acidophilus*, *L.*  
23 *rhamnosus* and *Bifido. bifidum*).<sup>51</sup> Orrhage et al. had two treatment arms (*Bifido. longum* alone  
24 and a mixture of *Bifido. longum* and *L. acidophilus*).<sup>52</sup> Larsen et al. tested two single probiotics  
25 (*Bifido. lactis* and *L. acidophilus*) in separate treatment arms.<sup>53</sup> Lidbeck et al. gave either  
26 enoxacin or clindamycin and randomized patients to either *L. acidophilus* or placebo.<sup>54</sup>  
27  
28  
29  
30  
31  
32  
33  
34  
35  
36  
37

38 **Normal microbiota assay methods.** Of the 69 treatment arms that did normal microbiota assays,  
39 diverse methods were used to profile the microbiota. Many studies used only standard  
40 microbiological culture assays (37, 54%), while others (28, 40%) used techniques to detect non-  
41 cultivatable bacterial strains, which included metagenomic assays (FISH, TRFLP, 16s rRNA  
42 sequencing) or other PCR techniques. Some studies (4, 6%) used an indirect measure of normal  
43 microbiota, using the Nugent score to diagnose bacterial vaginosis, which relies upon gram stain  
44 of the vaginal secretions, vaginal pH and symptoms to characterize if normal microbiota is  
45 present or absent.<sup>15</sup>  
46  
47  
48  
49  
50  
51  
52  
53  
54  
55  
56  
57  
58  
59  
60

1  
2  
3 **Probiotic strains.** In the 69 treatment arms, most (36, 52%) used a single strain of probiotic,  
4 while 14 (20%) tested a mix of two probiotic strains and 19 (28%) tested a mix of three or more  
5 probiotic strains. The distribution of single versus multiple strain probiotics did not significant  
6 vary by the model of study design ( $X^2_2=2.3$ ,  $P=0.32$ ). Of the 15 restorative (Model A) study  
7 arms, 47% used a single strain of probiotic and 53% used multiple strains. Of the 25 treatment  
8 arms with disrupted microbiota at baseline (Model B), 44% used a single strain and 56% used  
9 multiple strains. Of the 29 study arms with undisrupted microbiota (Model C), 62% used a  
10 single strain and 38% used multiple strains.  
11  
12  
13  
14  
15  
16  
17  
18  
19

### 20 **Normal microbiota restoration model (Model A)**

21  
22  
23 The study design with the highest quality capable of documenting the recovery of normal  
24 microbiota due to a probiotic treatment requires that subjects be enrolled with a normal,  
25 undisrupted microbiota, then be exposed to a disruptive factor (e.g. antibiotics, chemotherapy,  
26 disease onset, etc.), followed by probiotic treatment and a follow-up period post-probiotic to  
27 document recovery of the microbiota back to the baseline profiles. We found only 10 studies  
28 (with 15 treatment arms) that fit these criteria (Table 1).<sup>32,34,50-52,54-58</sup> The type of enrolled  
29 subjects varied from healthy volunteers to children with untreated respiratory infections, to  
30 pediatric cancer patients. For subjects with acute infections or cancer, baseline assays were done  
31 prior to the disrupting agent (antibiotics or chemotherapy). The number of subjects given  
32 probiotics averaged 20/study and ranged from 5 to 83. In 93%, the disruptive factor was  
33 antibiotic exposure and in one study, chemotherapy caused the microbiota disruption. Only 8  
34 (53%) of the study arms did an assay during a 1-8 week follow-up period after the probiotic was  
35 discontinued.  
36  
37  
38  
39  
40  
41  
42  
43  
44  
45  
46  
47  
48

49 Of the 15 probiotic treatment arms, 7 (47%) showed restoration of the assayed normal  
50 microbiota, 5 (33%) showed partial recovery and 3 (20%) showed no change in the microbiota.  
51 Analysis of the probiotic strain(s) separately found only two probiotic products with more than  
52 one randomized controlled trial. The probiotic mix of *L. acidophilus* and *Bifido. bifidum* showed  
53 a complete restoration in one study, but only a partial recovery in the other. (Strength: strong,  
54  
55  
56  
57  
58  
59  
60

1  
2  
3  
4  
5  
6  
7  
8  
9  
10  
11  
12  
13  
14  
15  
16  
17  
18  
19  
20  
21  
22  
23  
24  
25  
26  
27  
28  
29  
30  
31  
32  
33  
34  
35  
36  
37  
38  
39  
40  
41  
42  
43  
44  
45  
46  
47  
48  
49  
50  
51  
52  
53  
54  
55  
56  
57  
58  
59  
60

Quality: high). The probiotic mix of *L. acidophilus* (2 strains) with *Bifido. bifidum* and *Bifido. animalis* showed complete restoration in one study, but only a partial recovery in the other. (Strength: strong, Quality: high). Five other probiotic products with only one supporting clinical trial showed microbiota restoration (*Bifido. longum*, *Clostridium butyricum*, *L. acidophilus*, mix of *L. acidophilus* with *L. paracasei* and *Bifido. lactis*, and the mix of *L. acidophilus* with *L. paracasei* and *Bifido. bifidum* and two strains of *Bifido. lactis*). (Strength: moderate, Quality: high). Three probiotic products with one supporting clinical trial showed partial restoration (*S. boulardii*, *L. rhamnosus* GG, mix of *L. rhamnosus* with *L. bifidus* and *L. acidophilus*), (Strength: moderate, Quality: high). Only two probiotic products using Model A showed no change in the microbiota (*Bifido. breve* and a mix of *L. acidophilus* and *Bifido. longum*). (Strength: moderate, Quality: high).

Of the 11 probiotic products with claims of 'restores or improves normal microbiota', 10 (91%) were supported by our analysis, but only seven showed complete restoration and five had partial restoration of the microbiota (Table 1). We confirmed that the mixture of *L. acidophilus* and *Bifido. longum* did not show any changes in the microbiota. We disagreed with the conclusions of one of the studies. Wada et al. claimed *Bifido. breve* 'enhanced intestinal anaerobes', but this was only compared to the placebo group.<sup>32</sup> Their data showed chemotherapy is a disruptive event, resulting in more Enterobacteria in the intestine in the placebo group, but there were no significant differences seen by the end of the 8 week follow-up in either the probiotic or the placebo group compared to baseline microbiota levels.

### Disrupted normal microbiota at baseline studies (Model B)

Model B is a study design enrolling subjects with a pre-existing disrupted microbiota related to ongoing disease or conditions. In 25 treatment arms, patients with acute or chronic disease were enrolled and randomized to probiotics or controls and normal microbiota was assayed at enrollment, during treatment and/or post-treatment (Table 2).<sup>33,53,59-80</sup> The number of subjects given probiotics averaged  $23 \pm 16$ /study and ranged from 7-83 participants. The types of pre-existing factors that disrupted the microbiota included atopic dermatitis patients, allergies,

1  
2  
3 cirrhosis, bacterial vaginosis, irritable bowel syndrome, inflammatory bowel disease (ulcerative  
4 colitis and pouchitis), idiopathic diarrhea, enteral feeding, short-bowel syndrome and colon  
5 cancer. Only 10 (40%) of the study arms did an assay during the post-probiotic follow-up  
6 period.  
7  
8  
9

10  
11  
12  
13  
14 Our analysis found 12 (48%) of the study arms supported an alteration or modification of the  
15 microbiome, while 13 (52%) found no significant change in the microbiota. Three of the  
16 probiotics had multiple clinical trials to support the claim of an improvement in the microbiota  
17 due to the probiotic. *S. boulardii* was used in two trials either with enteral fed patients or  
18 patients with active diarrhea and found an improvement in the habitual microbiota in the patients  
19 with active diarrhea<sup>66</sup>, but only showed indirect evidence of short-chain fatty acid changes in the  
20 other study.<sup>65</sup> (Strength: strong, Quality: moderate) A mix of four probiotic strains (2 strains of  
21 *L. rhamnosus*, *P. freudenreichii* + *Bifido. breve*) showed improved microbiota in two clinical  
22 trials.<sup>74,75</sup> (Strength: strong, Quality: moderate) Of four clinical trials testing a mixture of seven  
23 probiotic strains, two showed no significant change in microbiota<sup>77,78</sup>, one showed more  
24 anaerobes post-probiotic treatment<sup>79</sup> and one found a reduction in *Bacteroides* species.<sup>80</sup>  
25 (Strength: strong, Quality: moderate) Three clinical trials determined there were no significant  
26 changes due to *L. plantarum* 299v.<sup>62-64</sup> (Strength: strong, Quality: moderate). Of those probiotics  
27 with only one supporting clinical trial (Strength: moderate, Quality: moderate), two single  
28 probiotic strains (*E. coli* Nissle and *L. casei rhamnosus*) and five different mixtures of probiotic  
29 strains support the claim that the probiotic alters the microbiota (Table 2).  
30  
31  
32  
33  
34  
35  
36  
37  
38  
39  
40  
41  
42  
43  
44  
45

46 Of the 25 treatment arms, we confirmed the paper's claim in 14 (56%) of the studies. We agreed  
47 that there was no significant change in the microbiota due to the probiotic in nine treatment arms  
48 only an alteration of the microbiota in five others (Table 2). We disagree with the claimed  
49 outcomes in 11 (46%) of the other treatment arms. In seven treatment arms, it was claimed the  
50 tested probiotic 'restored normal microbiota', but it is uncertain how this conclusion was reached,  
51 since there was no time when a normal undisrupted microbiota was present. Of the seven studies  
52 that claimed their probiotic 'restored' normal microbiota, our analysis determined none were  
53  
54  
55  
56  
57  
58  
59  
60

1  
2  
3  
4  
5  
6  
7  
8  
9  
10  
11  
12  
13  
14  
15  
16  
17  
18  
19  
20  
21  
22  
23  
24  
25  
26  
27  
28  
29  
30  
31  
32  
33  
34  
35  
36  
37  
38  
39  
40  
41  
42  
43  
44  
45  
46  
47  
48  
49  
50  
51  
52  
53  
54  
55  
56  
57  
58  
59  
60

capable of documenting restoration, but we do confirm that probiotics improved or altered the microbiota. Four studies claimed the probiotic 'altered or improved' normal microbiota, but we found no significant differences when post-probiotic and baseline assays were compared for the probiotic groups. Girard-Pipau et al. concluded that *S. boulardii* 'altered normal flora' because more gram positive anaerobes were seen in the probiotic group compared to the controls and an increase in three short-chain fatty acids were observed in the *S. boulardii* group.<sup>65</sup> However, when the analysis is restricted to trends observed in the probiotic group only, no significant differences were observed in pre-probiotic versus post-probiotic microbiota profiles. Venturi et al. concluded that the mix of seven probiotic strains enhanced the concentration of some beneficial strains in the intestines.<sup>77</sup> However, the only strains having a significant increase were those contained in the probiotic mix, and not specifically normal microbiota of the host. As this study did not have an undisturbed microbiota baseline, the increased numbers of Lactobacilli and Bifidobacteria may not have reflected their normal levels. Van der Aa et al. claimed that *Bifido. breve* 'successfully modulates the intestinal flora', but no significant changes were observed in the probiotic group when comparing the baseline to the post-probiotic levels.<sup>59</sup> Odamaki et al. did show an increase in *Faecalibacterium* ssp. and *Bacteroides fragilis* ssp. at the end of *Bifido. longum* BB536 treatment, but the same increase was also observed in the placebo group.<sup>33</sup>

### Undisrupted normal microbiota studies (Model C)

Twenty nine trials enrolled healthy adults who had no disruptive factor present during the study (either no antibiotic or no medication exposure or presence of acute or chronic disease) that might impact normal microbiota, as shown in Table 3.<sup>14,49,50,81-106</sup> The average number of subjects given probiotics was 23/study and ranged from 7 to 160/study. Of the 29 study arms, assays were taken during a follow-up period in only 52%. Not surprisingly, if the normal microbiota was not disturbed, most probiotic treatment arms (25, 86%) did not show a significant change of the microbiota and only 4 (14%) indicated some alteration in the microbiota. Fujiwara et al. cultured seven healthy volunteers and found Enterobacteriaceae and Clostridial species post-*Bifido. longum* was reduced by 10<sup>1</sup>/g compared to baseline (P<0.03), but no other changes in the microbiota were detected.<sup>84</sup> Karlsson et al. found a significant increase in intestinal diversity in nine male volunteers with atherosclerosis given *L. plantarum* 299v, but because

1  
2  
3 terminal restriction fragment length polymorphism assays were used instead of cultures for  
4 bacterial species, the specific changes in the microbiota species could not be determined.<sup>94</sup> Yang  
5 and Sheu cultured 63 children (55% with *H. pylori*) given a yogurt with *L. acidophilus* and  
6 *Bifido. lactis* but only found a decrease in *E. coli* counts in the *H. pylori* negative children sub-  
7 group, no significant changes in normal microbiota was found in the *H. pylori* positive  
8 children.<sup>100</sup> Kubota et al. assayed 29 subjects with Japanese cedar pollen allergy and found milk  
9 fermented with *L. rhamnosus* GG and *L. gasseri* TMC0356 suppressed microbiota changes (less  
10 intestinal profile changes), but could not determine specific bacterial species changes due to the  
11 type of assay used (FISH and TRFLP).<sup>103</sup>  
12  
13  
14  
15  
16  
17  
18  
19  
20  
21  
22

23 Of the seven studies that claimed their probiotic(s) 'restored or altered' the normal microbiota, we  
24 confirmed only four claims, but disagree with three studies. Sierra et al. claimed *L. salivarius*  
25 given to 20 healthy adults 'improved gut microbiota', but only increased levels of Lactobacilli  
26 were found and no other changes in normal microbiota species were detected. The only other  
27 evidence was indirect from changes observed in immune parameters.<sup>96</sup> He et al. claimed a  
28 mixture of *Bifido. longum* and *Bifido. animalis* 'modified' microbiota, but changes were seen  
29 only during the yogurt administration and not after the one week follow-up period.<sup>99</sup> Vitali et al.  
30 claimed that the mixture of four Lactobacilli strains and three Bifidobacteria strains 'modulated  
31 vaginal microbiota', but the only significant changes were due to an increase in the bacterial  
32 species contained in the probiotic mixture.<sup>14</sup>  
33  
34  
35  
36  
37  
38  
39  
40  
41  
42  
43

44 Of the probiotics supported by multiple clinical trials (*Bifido. animalis*, *Bifido. longum*, *L. casei*,  
45 *L. plantarum* 299v, the mixture of *Bifido. animalis* and *Bifido. lactis*), 13 (87%) support there is  
46 no significant change in normal microbiota if the microbiota is not disrupted. [Strength: strong,  
47 Quality: low)  
48  
49  
50  
51  
52  
53  
54

#### 55 **Association of clinical efficacy and normal microbiota restoration**

56  
57  
58  
59  
60



1  
2  
3  
4  
5  
6  
7  
8  
9  
10  
11  
12  
13  
14  
15  
16  
17  
18  
19  
20  
21  
22  
23  
24  
25  
26  
27  
28  
29  
30  
31  
32  
33  
34  
35  
36  
37  
38  
39  
40  
41  
42  
43  
44  
45  
46  
47  
48  
49  
50  
51  
52  
53  
54  
55  
56  
57  
58  
59  
60

Few studies concurrently compared clinical efficacy and the ability to restore or improve normal microbiota after dysbiosis. A synthesis of the literature of RCT for eight common disease indications was performed and the overall net strength was ranked. Probiotics with the ability to restore normal microbiota were frequently supported by RCTs for efficacy, as shown in Table 4. Of the 10 probiotics with evidence for restoration, 7 (70%) also had at least one RCT testing for at least one of the eight diseases, while 30% did not have any supportive RCTs for efficacy. Of the 7 probiotics with associated RCTs, only two probiotics (*S. boulardii* and *L. acidophilus*) have strong evidence for efficacy across most of the disease indications, while five probiotics with the ability to restore the microbiota had weak or no evidence of efficacy. For example, *S. boulardii*, which has studies supporting restoration, has strong evidence for clinical efficacy for AAD (ranked ++: 11 RCTs had significant results and 6 had non-significant results), CDI (ranked ++: had two RCTs with significant results), IBD (ranked ++: had two RCTs with significant results), IBS (ranked 0: had one RCT with significant efficacy and one RCT with non-significant results), TD (ranked +: 3 RCTs with significant efficacy and 2 with non-significant efficacy), *H. pylori* eradication (ranked -: 2 RCTs with significant results and 4 with non-significant results) and no studies for BV. *L. acidophilus*, which partially restored the microbiota in a study, is associated with clinical efficacy for AAD, IBS and BV, but not for TD or eradication of *H. pylori* and treatment of acute pediatric diarrhea (ranked ++: had 19 RCTs with significant protection and five with non-significant results). In contrast, *L. rhamnosus GG*, another probiotic capable of restoring microbiota, is often cited in meta-analysis as having significant efficacy for AAD. Our results of an updated review of the literature indicate a net weak evidence rating for clinical efficacy across all disease indications: AAD (ranked -: 3 RCTs had significant results and 6 had non-significant results), CDI (ranked -: two RCTs with non-significant results), IBD (ranked -: one RCT with non-significant results), IBS (ranked 0: 2 RCTs with significant efficacy and two RCTs with non-significant results), TD (ranked 0: one RCT with significant efficacy and one with non-significant efficacy), *H. pylori* eradication (ranked -: 3 RCTs with non-significant results), no RCTs for BV and treatment of acute pediatric diarrhea (ranked ++: 10 RCTs with significant efficacy and one with non-significant findings).

1  
2  
3 Efficacy trials were not done as frequently for probiotics shown to only have the ability to alter  
4 or improve, but not restore, the microbiota after dysbiosis. Of nine probiotics that can alter the  
5 microbiota, 6 (67%) have supporting RCTs for at least one disease, but the diversity of  
6 investigated diseases was more limited. *L. casei* had moderate net strength for AAD and  
7 bacterial vaginosis, but was neutral for the ability to eradicate *H. pylori* and other disease  
8 indications were not tested in RCTs with *L. casei*. The probiotic mixture of *L. reuteri* and *L.*  
9 *fermentum* has strong evidence for bacterial vaginosis, but not for any other disease indications  
10 listed in Table 4.  
11  
12  
13  
14  
15  
16  
17  
18  
19  
20

21 Of the eight probiotics not capable of altering or restoring normal microbiota, only *L. plantarum*  
22 299v had RCTs for AAD and IBS, both with net negative or weak strength of clinical efficacy.  
23 *Bifido. lactis* and the mixture of *L. rhamnosus* and *L. reuteri* had net neutral rankings for efficacy  
24 for the treatment of acute pediatric diarrhea. The other four probiotic products with no effect on  
25 normal microbiota lacked any RCTs for clinical efficacy. Studies with *B. clausii* did not assay  
26 for normal microbiota and had non-significant trial results for *H. pylori* eradication and the  
27 treatment of pediatric diarrhea.  
28  
29  
30  
31  
32  
33  
34

35 Of the six probiotics with only pharmacokinetic data on the probiotic itself and no other  
36 investigation of other normal microbiota strains, five had RCTs showing varying net efficacies  
37 for different disease indications, as shown in Table 4.  
38  
39  
40  
41

42 Six popular probiotics (*Bacillus clausii*, *Bifido. infantis*, *L. reuteri*, *L. acidophilus* + *L. helveticus*,  
43 *L. acidophilus* + *L. casei* and *L. acidophilus* + *Bifido. animalis*) have only clinical efficacy  
44 RCTs, but have not published studies investigating their role in restoring or improving the  
45 normal microbiota.  
46  
47  
48  
49  
50  
51

## 52 Discussion

53  
54 Developing and evaluating health claims for probiotics is an important issue and is now  
55 identified as a priority for research by several international organizations, including the World  
56  
57  
58  
59  
60

1  
2  
3 Gastroenterology Organization<sup>107</sup> and the American Society for Nutrition.<sup>2</sup> The U.S. Food and  
4 Drug Administration has struggled with appropriate evidence-based health claims for probiotic  
5 products and recommends the use of structure/function claims, such as "maintains bowel  
6 regularity", but the claim for restoring normal microbiota is under debate.<sup>108</sup> The European Food  
7 Safety Authority (EFSA) provides guidance materials that recommend health claims for  
8 probiotics should have beneficial physiological effects and have appropriate scientific trials to  
9 substantiate the health claims.<sup>3</sup> Acceptable claims for intestinal health include functional claims  
10 (improved transit time, softer stool consistency, reduction in gastrointestinal discomfort, defense  
11 against pathogens) and changes related to gastrointestinal microbiota. As it is currently not  
12 possible to define a standard normal microbiota profile, the EFSA recommends functional claims  
13 for the restoration of normal microbiota should be accompanied by a beneficial physiological or  
14 clinical outcome.<sup>3</sup> In addition, because the efficacy and mechanisms are strain-specific and may  
15 vary by probiotic strain, the evidence must be analyzed for each probiotic product  
16 individually.<sup>5,6,9,109,110</sup>  
17  
18  
19  
20  
21  
22  
23  
24  
25  
26  
27  
28  
29

30 When the literature on probiotics and its impact on the normal microbiota was reviewed from 69  
31 different treatment arms, the evidence shows probiotics restored normal microbiota in only 10%  
32 of the trials, probiotics altered normal microbiota in 30% and no change in the normal microbiota  
33 was found (60%).  
34  
35  
36  
37  
38

39 An underappreciated finding was the influence that study design and study populations have on  
40 the interpretation of study results. In this review, five different types of study designs were  
41 found in the literature relating to probiotics and dysbiosis. The most common study type was a  
42 randomized controlled trial testing the efficacy and safety outcomes in patients, but these trials  
43 did not typically document the impact of the probiotic on the normal microbiota of the patient.  
44 The second type of study design was for pharmacokinetic studies (documenting recovery of oral  
45 dose of probiotic or increase in probiotic strains post-treatment compared to pre-treatment or  
46 clearance of the probiotic). Even though these kinetic studies did not assay for non-probiotic  
47 strains, some extrapolated their results and concluded some effect or improvement of the normal  
48 microbiota was observed by their probiotic.<sup>19,111</sup> These two first types of study designs do not  
49 support evidence-based conclusions for the restoration or alteration of the normal microbiota and  
50  
51  
52  
53  
54  
55  
56  
57  
58  
59  
60

1  
2  
3 were excluded from this review. The third type of study design started with inappropriate  
4 baselines (baseline samples taken after normal microbiota had been disrupted by chronic  
5 disease). For patients with established chronic diseases, there is no “normal microbiota” baseline  
6 in either the probiotic or the control group. Even if baselines are taken during remission, the  
7 microbiota may still be impacted by chronic disease or acute diarrhea. Studies of probiotics in  
8 chronic diseases or acute disease typically report on ‘pre-probiotic treatment’ and ‘post-probiotic  
9 treatment’ and may show significant shifts in microbial species, but it is uncertain if this reflects  
10 a true re-establishment of normal microbiota profiles. The fourth type of study design enrolled  
11 healthy volunteers, who were not challenged with antibiotics (so no normal microbiota  
12 disruption occurred), and show only the effect of probiotics on a healthy microbiota (typically  
13 mild or no effects). The fifth type of study design had normal microbiota assayed at least twice  
14 (at baseline, which was before exposure to a disruptive event or probiotics and then again during  
15 or post-probiotic treatment) to show actual recovery of assayed normal microbiota back to  
16 baseline levels. Control groups were not required for our assessment of the impact of probiotics  
17 on microbiota, but control groups can document the degree normal microbiota is disrupted by  
18 inciting agents (antibiotic, disease onset, etc.).  
19  
20  
21  
22  
23  
24  
25  
26  
27  
28  
29  
30  
31  
32  
33  
34

35 Five single strain probiotics (*Bifido. longum*, *Clost. butyricum*, *L. acidophilus*, *L. rhamnosus* and  
36 *S. boulardii*) and four probiotic mixtures (*L. acidophilus* + *Bifido. bifidum*, *L. rhamnosus* + *L.*  
37 *bifidus* + *L. acidophilus*, *L. acidophilus* + *L. paracasei* + *Bifido. lactis*, *L. acidophilus*, 2 strains,  
38 *Bifido. bifidum*, *Bifido. animalis*) documented either complete or partial recovery of normal  
39 microbiota (Model A). Only two probiotic mixtures [(2 strain mixture: *L. acidophilus* + *Bifido.*  
40 *bifidum*) and (4 strain mixture: *L. acidophilus*, 2 strains, *Bifido. bifidum*, *Bifido. animalis*)] were  
41 supported by a confirmatory study. Evidence that probiotics may alter or improve normal  
42 microbiota (Model B) was found for three single strain probiotics (*E. coli* Nissle, *S. boulardii*  
43 and *L. casei rhamnosus*) and seven mixtures of 2-7 probiotic strains. Of these ten probiotics  
44 finding alteration of the microbiota, only three had multiple trials [*S. boulardii*, and a four strain  
45 mixture (2 strains of *L. rhamnosus* + *P. freudenreichii* + *Bifido. breve*), and a seven strain  
46 mixture (4 Lactobacilli and 3 Bifidobacteria strains)], but only one had consistent results  
47  
48  
49  
50  
51  
52  
53  
54  
55  
56  
57  
58  
59  
60

1  
2  
3 showing improvements in the microbiota.<sup>74,75</sup> Clearly, more than one study is needed to confirm  
4 the impact of a probiotic on the normal microbiota.  
5  
6  
7  
8  
9

10 Of the 19 probiotic strains (or mixtures) studied in healthy volunteers who were not exposed to  
11 disruptive factors, no change in the normal microbiota was observed for 79%, indicating the  
12 robustness of the microbiota.  
13  
14

15  
16  
17  
18 Improvement in the normal microbiota by specific probiotic strains seemed to be associated with  
19 better clinical endpoints. Within eight common diseases typically treated with probiotics, more  
20 trials with significant efficacy were associated with probiotic strains shown to restore the normal  
21 microbiota, and only one trial with significant efficacy was found for probiotics that did not alter  
22 the microbiota. However, few probiotics had efficacy trials for all eight diseases and many did  
23 not have any efficacy trials.  
24  
25  
26  
27  
28  
29

30  
31  
32  
33 Some probiotics which have published efficacy trials for various diseases did not have studies  
34 investigating the effect of the probiotic on normal microbiota: *Bacillus clausii*, *Bifido. infantis*, *L.*  
35 *brevis*, *L. reuteri*, mix of 2 strains (*L. acidophilus* + *L. helveticus*), mix of 2 strains (*L.*  
36 *acidophilus* + *L. casei*) or (*L. acidophilus* + *Bifido. animalis*), mix of 4 strains [*L. rhamnosus* (2  
37 strains), *Propionibacterium freudenreichii* + *Bifido. animalis*] and mix of 7 strains (*L.*  
38 *sporogens*, *L. bifidum*, *L. bulgaricus*, *L. thermophilus*, *L. acidophilus*, *L. casei*, *L. rhamnosus*).  
39  
40  
41  
42  
43  
44  
45  
46  
47

### 48 **Comparison of results with other studies**

49  
50 Other reviews in the literature of health claims for probiotics relating to changes in the normal  
51 microbiota have focused on the broad issues of regulatory standardization of health claims, the  
52 use of proper study designs and the challenge of defining biomarkers for a 'healthy  
53 microbiota'.<sup>3,29,112</sup> Donovan et al. recommends that health claims for probiotics be supported by  
54 well-conducted human trials in the targeted population.<sup>2</sup> These reviews also recommend that gut  
55  
56  
57  
58  
59  
60

1  
2  
3 biomarkers need to be correlated with clinical endpoints, however none of these reviews  
4 attempted to do so.<sup>29,112</sup> No prior review has attempted to analyze the association between  
5 probiotic strains and their impact on normal microbiota by stratifying on the quality of study  
6 design.<sup>111</sup> This review addressed these concerns by analyzing probiotic strains by the quality of  
7 the study design and only including trials that assessed the normal microbiota (either by  
8 microbial culturing or molecular strain biomarkers) and assessed the degree of dysbiosis  
9 improvement with clinical outcomes for each probiotic strain.  
10  
11  
12  
13  
14  
15  
16  
17  
18  
19

### 20 **Opportunities for future research**

21  
22 Most of the studies (80%) using Model A to document restoration of the normal microbiota only  
23 used microbiologic culturing techniques, which can only detect those organisms that grow in  
24 culture. Use of the more advanced molecular metagenomic techniques have found that culturing  
25 alone misses up to 95% of these organisms.<sup>21,22</sup> The use of the metagenomic techniques was  
26 more common in the studies using Model B (48%) and Model C (45%) study designs, which  
27 only addresses potential alteration of the microbiota. Characterization of the microbiota is a  
28 complex issue and a comprehensive accounting of all the bacterial and fungal strains in the body  
29 is beyond our current capabilities. Therefore, any studies of changes to the microbiota are  
30 incomplete at best, but general trends in bacterial phylotypes can be documented using DNA  
31 probes and metagenomic techniques. Differential detection bias may be present due to the  
32 variety of assays used in these studies and should be accounted for in future studies.  
33  
34  
35  
36  
37  
38  
39  
40  
41  
42  
43  
44

45 Another suggestion for future studies is to include an appropriate follow-up time period post-  
46 probiotic administration. Fewer than half of the reviewed trials did assays for normal microbiota  
47 during an appropriate follow-up period. As it has been shown that recovery from a disrupting  
48 factor can be prolonged (typically eight weeks),<sup>7,8</sup> and studies that failed to find microbiota  
49 recovery might have detected a return to normal baseline levels if a sufficiently long time was  
50 given for the recovery to have occurred. Future studies should strive to allow time for the  
51 restoration of the normal microbiota to occur.  
52  
53  
54  
55  
56  
57  
58  
59  
60

## Strengths and weaknesses

The strengths of this review included the completeness of the search strategy, which reviewed multiple citation databases, trial registries and author searches, use of established PRISMA protocols for reviews and the use of an outcome classification scheme for different degrees of assessment for microbial recovery. This analysis controlled the confounding effects of different study populations and study designs present in the literature. Pharmacokinetic studies of just the probiotic strain(s) itself were excluded and only trials that assayed other species found in the microbiota were included. By applying a standard definition for 'restoring' versus 'improving' normal microbiota, it is possible to distinguish significant differences by the type of study designs used and differential effects of the different probiotic strains. Limitations of this review include pooling trials from different populations (adult versus pediatric) and different probiotic doses and regimens used. Incomplete retrieval of all studies assessing the effect that probiotics have on human microbiota is also a potential limitation of any literature search. Another limitation is that dysbiosis improvement and clinical efficacy for probiotic strains is also indirectly associated, no direct cause and effect relationship was possible with the types of studies done.

## Conclusion

The challenges in recommending a specific probiotic to patients who need to restore or improve their normal microbiota after a disrupting event occurs is two-fold: one is the diversity of probiotic products available and second is the varying strength of evidence provided by clinical trials using different outcome measures and study designs. By grouping studies into three groups that result in three different degrees of probiotic effect (restoration, improvement or no change), an overview of the body of evidence is possible. By comparing the strength of the clinical evidence for common diseases by the degree to which the probiotics could impact the restoration of the normal microbiota, it became obvious that those probiotics with a greater ability to restore the microbiota are associated with the strongest strength of clinical efficacy. While this evidence only indirectly links clinical efficacy with the ability to restore the microbiota, the overall review of the evidence shows this is an important mechanism of action for probiotics. What becomes

obvious is that more studies are required to conclude which probiotic strains have a beneficial impact on the normal microbiota, as most strains have only a single clinical trial and many probiotic products overstate the strength of their claim to restore normal microbiota.

For peer review only

1  
2  
3  
4  
5  
6  
7  
8  
9  
10  
11  
12  
13  
14  
15  
16  
17  
18  
19  
20  
21  
22  
23  
24  
25  
26  
27  
28  
29  
30  
31  
32  
33  
34  
35  
36  
37  
38  
39  
40  
41  
42  
43  
44  
45  
46  
47  
48  
49  
50  
51  
52  
53  
54  
55  
56  
57  
58  
59  
60



1  
2  
3  
4  
5  
6  
7  
8  
9  
10  
11  
12  
13  
14  
15  
16  
17 **Figure 1.** Time sequence of events and three models of study designs determining three different  
18 degrees of dysbiosis correction by probiotics.  
19  
20  
21  
22  
23  
24  
25  
26  
27  
28  
29  
30  
31  
32  
33  
34  
35  
36  
37  
38  
39  
40  
41  
42  
43  
44  
45  
46  
47  
48  
49  
50  
51  
52  
53  
54  
55  
56  
57  
58  
59  
60

Peer review only

1  
2  
3  
4  
5  
6  
7  
8  
9  
10  
11  
12  
13  
14  
15  
16  
17  
18  
19  
20  
21  
22  
23  
24  
25  
26  
27  
28  
29  
30  
31  
32  
33  
34  
35  
36  
37  
38  
39  
40  
41  
42  
43  
44  
45  
46  
47  
48  
49  
50  
51  
52  
53  
54  
55  
56  
57  
58  
59  
60

**Figure 2.** Flow-chart of literature review results (1985-2013) of included and excluded studies for the restoration or improvement of normal microbiota by probiotics.

Abbreviations: RCT, randomized-controlled trials; MOA, mechanism of action; NM, normal microbiota

For peer review only

**Table 1. Model A:** Evidence-based data for restoration of normal microbiota (NM) for 12 probiotics from 10 studies (15 treatment arms).

| Probiotic                                                                                                            | Reference                                                | No. treated with probiotic | Type(s) of assay for NM | Enrolled population                    | Type of disrupting factor    | Follow-up post-treatment (wks) | Claims stated in papers   | Evidence-based claim       |
|----------------------------------------------------------------------------------------------------------------------|----------------------------------------------------------|----------------------------|-------------------------|----------------------------------------|------------------------------|--------------------------------|---------------------------|----------------------------|
| <i>Bifido. breve</i>                                                                                                 | Wada 2010 <sup>32</sup>                                  | 19                         | FISH                    | pediatric cancer patients              | chemotherapy                 | 8                              | enhances anaerobes        | no change                  |
| <i>Bifido. longum</i>                                                                                                | Orrhage 1994 <sup>52</sup>                               | 10                         | culture                 | healthy volunteers                     | clindamycin                  | 0                              | restores                  | restores                   |
| <i>Clost. butyricum</i>                                                                                              | Seki 2003 <sup>34</sup>                                  | 83                         | culture                 | pediatric respiratory or GI infections | antibiotics                  | 0                              | restores                  | restores                   |
| <i>L. acidophilus</i>                                                                                                | Lidbeck 1988 <sup>54</sup>                               | 5                          | culture                 | healthy volunteers                     | enoxacin or                  | 1                              | restores only in enoxacin | restores only in enoxacin, |
|                                                                                                                      |                                                          | 5                          | culture                 | volunteers                             | clindamycin                  | 1                              | no change                 | no change in clindamycin   |
| <i>L. rhamnosus GG</i>                                                                                               | Zoppi 2001 <sup>51</sup>                                 | 7                          | culture                 | pediatric respiratory infections       | ceftriaxone                  | 0                              | partially corrects        | partially restores         |
| <i>S. boulardii</i>                                                                                                  | Zoppi 2001 <sup>51</sup>                                 | 6                          | culture                 | pediatric respiratory infections       | ceftriaxone                  | 0                              | improves                  | partially restores         |
| <i>L. acidophilus</i> + <i>Bifido. bifidum</i>                                                                       | Black 1991, <sup>55</sup><br>Zoppi 2001 <sup>51</sup>    | 10,                        | culture,                | healthy volunteers,                    | ampicillin,                  | 2,                             | recovers more rapidly,    | restores,                  |
|                                                                                                                      |                                                          | 7                          | culture                 | pediatric respiratory                  | ceftriaxone                  | 0                              | less change               | partially restores         |
| <i>L. acidophilus</i> + <i>Bifido. longum</i>                                                                        | Orrhage 1994 <sup>52</sup>                               | 10                         | culture                 | healthy volunteers                     | clindamycin                  | 0                              | no change                 | no change                  |
| <i>L. rhamnosus</i> + <i>L. bifidus</i> + <i>L. acidophilus</i>                                                      | Zoppi 2001 <sup>51</sup>                                 | 7                          | culture                 | pediatric respiratory infections       | ceftriaxone                  | 0                              | partially corrects        | partially restores         |
| <i>L. acidophilus</i> + <i>L. paracasei</i> + <i>Bifido lactis</i>                                                   | Jernberg 2005 <sup>56</sup>                              | 4                          | culture PCR TRFLP       | healthy volunteers                     | clindamycin                  | 2                              | restores                  | restores                   |
| <i>L. acidophilus</i> + <i>L. acidophilus</i> + <i>Bifido. bifidum</i> + <i>Bifido animalis</i>                      | Madden 2005, <sup>57</sup><br>Plummer 2005 <sup>58</sup> | 15,                        | culture,                | <i>H. pylori</i> +,                    | amoxicillin + metronidazole, | 2,                             | restores,                 | restores,                  |
|                                                                                                                      |                                                          | 76                         | culture                 | <i>H. pylori</i> +                     | amoxicillin + clarithromycin | 2                              | restores more rapidly     | partially restores         |
| <i>L. acidophilus</i> + <i>L. paracasei</i> + <i>Bifido. bifidum</i> + <i>Bifido. lactis</i> + <i>Bifido. lactis</i> | Engelbrek-tson 2006 <sup>50</sup>                        | 20                         | culture PCR TRFLP       | healthy volunteers                     | augmentin                    | 2                              | restores                  | restores                   |

**Table 2. Model B:** Evidence-based data for improvement or alteration of normal microbiota (NM) in 18 probiotics from 24 studies (25 treatment arms) with disturbed microbiota at baseline.

| Probiotic                                                                   | Reference                                                                             | No. treated with probiotic | Type(s) of assay for NM         | Pre-existing disrupting factor        | Follow-up time   | Claims stated in papers               | Evidence-based claim                  | Type of change found in NM                 |
|-----------------------------------------------------------------------------|---------------------------------------------------------------------------------------|----------------------------|---------------------------------|---------------------------------------|------------------|---------------------------------------|---------------------------------------|--------------------------------------------|
| <i>Bifido. breve</i>                                                        | Van der Aa 2010 <sup>59</sup>                                                         | 46                         | FISH                            | Atopic dermatitis                     | 0                | modulates NF                          | no change                             | --                                         |
| <i>Bifido. lactis</i>                                                       | Larsen 2011 <sup>53</sup>                                                             | 17                         | PCR                             | Atopic dermatitis                     | 0                | no change                             | no change                             | --                                         |
| <i>Bifido. longum</i>                                                       | Odamaki 2007 <sup>33</sup>                                                            | 22                         | TRFLP PCR                       | Cedar pollen allergy                  | 4 wk             | maintains NF                          | no change                             | --                                         |
| <i>E. coli</i>                                                              | Lata 2007 <sup>60</sup>                                                               | 22                         | culture                         | liver cirrhosis                       | 0                | restores                              | improves                              | more Bifido. & Lacto.                      |
| <i>L. acidophilus</i>                                                       | Larsen 2011 <sup>53</sup>                                                             | 17                         | PCR                             | atopic dermatitis                     | 0                | no change                             | no change                             | --                                         |
| <i>L. casei rhamnosus</i>                                                   | Petricevic 2008 <sup>61</sup>                                                         | 83                         | Nugent scores                   | bacterial vaginosis                   | 4 wk             | restores                              | improves                              | improved Nugent scores                     |
| <i>L. plantarum 299v</i>                                                    | Nobaek 2000, <sup>62</sup><br>Klarin 2005, <sup>63</sup><br>Klarin 2008 <sup>64</sup> | 25,<br>17,<br>22           | culture,<br>culture,<br>culture | IBS,<br>enterally-fed,<br>antibiotics | 4 wk,<br>0,<br>0 | no change,<br>no change,<br>no change | no change,<br>no change,<br>no change | --                                         |
| <i>S. boulardii</i>                                                         | Girard 2002, <sup>65</sup><br>Swidsinski 2008 <sup>66</sup>                           | 10,<br>20                  | culture,<br>FISH                | enterally-fed,<br>active diarrhea     | 9 d,<br>3 wk     | alters NF,<br>improves                | no change,<br>improves                | --<br>more 'habitual microbiota'           |
| <i>L. reuteri</i> +<br><i>L. fermentum</i>                                  | Reid 2001 <sup>67</sup>                                                               | 33                         | Nugent scores                   | bacterial vaginosis                   | 2 wk             | restores                              | improves                              | improved Nugent scores                     |
| <i>L. rhamnosus</i> +<br><i>L. fermentum</i>                                | Reid 2003 <sup>68</sup>                                                               | 31                         | Nugent scores and culture       | bacterial vaginosis                   | 30 d             | restores                              | improves                              | improved Nugent scores                     |
| <i>L. plantarum</i> +<br><i>Bifido bifidum</i>                              | Kirpich 2008 <sup>69</sup>                                                            | 32                         | culture                         | colon cancer                          | 0                | restores                              | improves                              | more <i>E. coli</i> and <i>Enterococci</i> |
| <i>L. rhamnosus</i> +<br><i>L. reuteri</i>                                  | Hummelen 2010 <sup>70</sup>                                                           | 23                         | Nugent score                    | bacterial vaginosis                   | 0                | no change                             | no change                             | --                                         |
| <i>L. casei</i> +<br><i>Bifido breve</i>                                    | Uchida 2007 <sup>71</sup>                                                             | 4                          | culture                         | short bowel syndrome                  | 0                | no change                             | no change                             | --                                         |
| <i>L. brevis</i> +<br><i>L. salivaris</i> +<br><i>L. plantarum</i>          | Mastromarini 2009 <sup>72</sup>                                                       | 19                         | Nugent score                    | bacterial vaginosis                   | 2 wk             | restores                              | improves                              | improved Nugent scores                     |
| <i>L. paracasei</i> +<br><i>L. acidophilus</i> +<br><i>Bifido. animalis</i> | Roessler 2012 <sup>73</sup>                                                           | 30                         | PCR                             | atopic dermatitis                     | 0                | no change                             | no change                             | --                                         |

|                                                                                                                                                                                                                |                                 |     |                  |                        |       |                     |            |                                                   |
|----------------------------------------------------------------------------------------------------------------------------------------------------------------------------------------------------------------|---------------------------------|-----|------------------|------------------------|-------|---------------------|------------|---------------------------------------------------|
| <i>L. rhamnosus</i> +<br><i>L. rhamnosus</i> +<br><i>P. freudenreichii</i><br>+ <i>Bifido. breve</i>                                                                                                           | Kajander<br>2005, <sup>74</sup> | 41, | PCR,             | IBS,                   | 0,    | restores,           | improves,  | Improved<br>similarity<br>index                   |
|                                                                                                                                                                                                                | Lyra 2010 <sup>75</sup>         | 22  | PCR              | IBS                    | 0     | alters              | alters     | More<br>Clostridia<br>and<br>Rumino-<br>coccus    |
| <i>L. acidophilus</i> +<br><i>L. plantarum</i> +<br><i>L. rhamnosus</i> +<br><i>Bifido. bifidum</i>                                                                                                            | Wong 2013 <sup>76</sup>         | 7   | PCR              | liver disease          | 0     | improves            | alters     | Less<br>Firmicutes,<br>more<br>Bacterio-<br>detes |
| <i>L. acidophilus</i> +<br><i>L. paracasei</i> +<br><i>L. delbrueckii ssp.</i><br><i>bulgaricus</i> +<br><i>L. plantarum</i> +<br><i>Bifido. longum</i> +<br><i>Bifido. infantis</i> +<br><i>Bifido. breve</i> | Venturi 1999,<br><sup>77</sup>  | 20, | culture          | ulcerative<br>colitis, | 15 d, | enhances,           | no change, | --                                                |
|                                                                                                                                                                                                                | Brigidi 2001,<br><sup>78</sup>  | 10, | culture &<br>PCR | IBS,                   | 10 d, | no change,          | no change, | --                                                |
|                                                                                                                                                                                                                | Kuhbacher<br>2006 <sup>79</sup> | 10  | FISH             | pouchitis              | 0     | altered<br>richness | altered    | More<br>anaerobes                                 |
|                                                                                                                                                                                                                | Ng 2013 <sup>80</sup>           | 10  | PCR              | IBS                    | 0     | modulates           | altered    | Less<br>Bacteroides                               |

\*disruption of normal microbiota at baseline shown by significant differences compared to control (non-diseased) population.

**Table 3. Model C:** Evidence-based data for improvement or alteration of normal microbiota (NM) in 19 probiotics in healthy volunteers enrolled in 29 studies (29 treatment arms) in studies with no disruptive exposures.

| Probiotic                                | Reference                                                                                                                                                   | No. treated with probiotic    | Type of assay for NM                                  | Enrolled population                                                    | Type of disrupting factor                | Follow-up post-treatment        | Claims stated in papers                                        | Evidence-based claim                                           |
|------------------------------------------|-------------------------------------------------------------------------------------------------------------------------------------------------------------|-------------------------------|-------------------------------------------------------|------------------------------------------------------------------------|------------------------------------------|---------------------------------|----------------------------------------------------------------|----------------------------------------------------------------|
| <i>Bifido. animalis (lactis)</i>         | Rochet 2008, <sup>49</sup><br>Oswari 2013 <sup>81</sup>                                                                                                     | 12,<br>160                    | FISH<br>PCR                                           | healthy volunteers                                                     | none,<br>none                            | 10 d,<br>6 mon                  | no change,<br>no change                                        | no change,<br>no change                                        |
| <i>Bifido. bifidum</i>                   | Langhendries 1995 <sup>82</sup>                                                                                                                             | 20                            | culture                                               | healthy volunteers                                                     | none                                     | 0                               | no change                                                      | no change                                                      |
| <i>Bifido. longum</i>                    | Benno 1992, <sup>83</sup><br>Fujiwara 2001, <sup>84</sup><br>Harmsen 2002 <sup>85</sup>                                                                     | 5,<br>7,<br>14                | culture,<br>culture,<br>FISH                          | healthy volunteers                                                     | none,<br>none,<br>none                   | 0,<br>30 d,<br>0                | no change,<br>alters,<br>no change                             | no change,<br>alters,<br>no change                             |
| <i>L. casei</i>                          | Guerin 1998, <sup>86</sup><br>Rochet 2006, <sup>87</sup><br>Rochet 2008 <sup>88</sup>                                                                       | 12,<br>12,<br>7               | culture,<br>FISH,<br>FISH                             | healthy volunteers                                                     | none,<br>none,<br>none                   | 1 wk,<br>10 d,<br>0             | no change,<br>no change,<br>no change                          | no change,<br>no change,<br>no change                          |
| <i>L. johnsonii</i>                      | Brunser 2006 <sup>89</sup>                                                                                                                                  | 32                            | culture &<br>FISH                                     | healthy volunteers                                                     | none                                     | 2 wk                            | no claim                                                       | no change                                                      |
| <i>L. plantarum 299v</i>                 | Goossens 2003, <sup>90</sup><br>Goossens 2005, <sup>91</sup><br>Goossens 2006, <sup>92</sup><br>Berggren 2003, <sup>93</sup><br>Karlsson 2010 <sup>94</sup> | 11,<br>32,<br>15,<br>33,<br>9 | culture,<br>culture,<br>culture,<br>culture,<br>TRFLP | healthy,<br>healthy,<br>colonic polyps,<br>healthy,<br>atherosclerosis | none,<br>none,<br>none,<br>none,<br>none | 3 wk,<br>4 wk,<br>0,<br>0,<br>0 | no change,<br>no change,<br>no change,<br>no change,<br>alters | no change,<br>no change,<br>no change,<br>no change,<br>alters |
| <i>L. rhamnosus GG</i>                   | Gueimonde 2006 <sup>95</sup>                                                                                                                                | 29                            | PCR                                                   | healthy volunteers                                                     | none                                     | 0                               | no change                                                      | no change                                                      |
| <i>L. salivarius</i>                     | Sierra 2010 <sup>96</sup>                                                                                                                                   | 20                            | culture                                               | healthy volunteers                                                     | none                                     | 0                               | improves                                                       | no change                                                      |
| <i>S. boulardii</i>                      | Vanhoutte 2006 <sup>97</sup>                                                                                                                                | 30                            | PCR                                                   | healthy volunteers                                                     | none                                     | 0                               | no change                                                      | no change                                                      |
| <i>Bifido. animalis + Bifido. longum</i> | Zhong 2006, <sup>98</sup><br>He 2008 <sup>99</sup>                                                                                                          | 11,<br>11                     | FISH,<br>FISH                                         | healthy volunteers                                                     | none                                     | 7 d,<br>7d                      | no change,<br>modifies                                         | no change,<br>no change                                        |
| <i>L. acidophilic + Bifido. lactis</i>   | Yang 2012 <sup>100</sup>                                                                                                                                    | 63                            | culture                                               | healthy but 55%<br><i>H. pylori</i> +                                  | none                                     | 0                               | restores                                                       | alters                                                         |
| <i>L. rhamnosus GG + Bifido. longum</i>  | Mah 2007 <sup>101</sup>                                                                                                                                     | 20                            | FISH                                                  | healthy neonates                                                       | none                                     | 6 mon                           | no change                                                      | no change                                                      |
| <i>L. rhamnosus GG + Bifido. lactis</i>  | Rafter 2007 <sup>102</sup>                                                                                                                                  | 38                            | culture                                               | colon cancer patients or at risk                                       | none                                     | 0                               | no change                                                      | no change                                                      |

|                                                                                                                                                                                                                |                                     |    |                          |                                   |      |      |                       |           |
|----------------------------------------------------------------------------------------------------------------------------------------------------------------------------------------------------------------|-------------------------------------|----|--------------------------|-----------------------------------|------|------|-----------------------|-----------|
| <i>L. rhamnosus GG</i> + <i>L. gasseri</i>                                                                                                                                                                     | Kubota 2009 <sup>103</sup>          | 14 | culture<br>FISH<br>TRFLP | healthy,<br>allergy<br>patients   | none | 0    | suppressed<br>changes | alters    |
| <i>L. paracasei</i> +<br><i>L. paracasei</i> +<br><i>L. gasseri</i>                                                                                                                                            | Morelli 2003 <sup>104</sup>         | 12 | culture                  | healthy<br>volunteers             | none | 3 d  | no claims             | no change |
| <i>L. acidophilus</i> +<br><i>L. paracasei</i> +<br><i>Bifido. lactis</i>                                                                                                                                      | Sullivan 2009 <sup>105</sup>        | 15 | culture                  | chronic<br>fatigue<br>patients    | none | 4 wk | no change             | no change |
| <i>L. rhamnosus</i> +<br><i>L. acidophilus</i> +<br><i>L. paracasei</i> +<br><i>Bifido. animalis</i>                                                                                                           | Engelbrektsen<br>2006 <sup>50</sup> | 22 | culture<br>TRFLP<br>PCR  | healthy<br>volunteers             | none | 2 wk | no change             | no change |
| <i>Bifido. animalis</i> +<br><i>L. delbrueckii</i> +<br><i>L. delbrueckii</i> +<br><i>L. lactis</i>                                                                                                            | McNulty<br>2011 <sup>106</sup>      | 7  | PCR                      | healthy<br>twins<br>volunteers    | none | 4 wk | no change             | no change |
| <i>L. acidophilus</i> +<br><i>L. paracasei</i> +<br><i>L. delbrueckii ssp.</i><br><i>bulgaricus</i> +<br><i>L. plantarum</i> +<br><i>Bifido. longum</i> +<br><i>Bifido. infantis</i> +<br><i>Bifido. breve</i> | Vitali 2012 <sup>14</sup>           | 15 | PCR                      | healthy<br>pregnant<br>volunteers | none | 0    | modulates             | no change |

Abbreviations: FISH, fluorescence *in situ* hybridization analysis; TRFLP, terminal restriction fragment length polymorphism analysis; PCR, polymerase chain reaction

**Table 4.** Comparison of the ability of probiotic to restore or improve dysbiosis with ranked clinical efficacy for various disease indications.

| Probiotic                                                                                                 | Restored normal microbiota* | Altered normal microbiota* | Ranked net evidence for efficacy* |     |     |          |          |          |              |                |
|-----------------------------------------------------------------------------------------------------------|-----------------------------|----------------------------|-----------------------------------|-----|-----|----------|----------|----------|--------------|----------------|
|                                                                                                           |                             |                            | AAD                               | CDI | IBD | IBS      | TD       | H pylori | Vaginitis/BV | Acute Ped diar |
| <b>Restores microbiota</b>                                                                                |                             |                            |                                   |     |     |          |          |          |              |                |
| <i>Clostr. butyricum</i>                                                                                  | yes                         | nd                         | -                                 |     |     |          |          |          | -            |                |
| <i>L. acidophilus</i> +<br><i>Bifido. bifidum</i>                                                         | yes                         | nd                         | <b>0</b>                          | -   |     |          |          |          |              |                |
| <i>L. acidophilus</i> +<br><i>L. paracasei</i> +<br><i>Bifido. lactis</i>                                 | yes                         | nd                         |                                   |     |     | -        |          |          |              |                |
| <i>Bifido. longum</i>                                                                                     | yes                         | no                         |                                   |     | -   | +        |          |          |              |                |
| <i>L. acidophilus</i> +<br><i>L. acidophilus</i> +<br><i>Bifido. bifidum</i> +<br><i>Bifido. animalis</i> | yes                         | nd                         |                                   |     |     |          |          |          |              |                |
| <i>L. acidophilus</i> +<br><i>L. paracasei</i> +<br><i>Bifido. lactis</i> (2)                             | yes                         | no                         |                                   |     |     |          |          |          |              |                |
| <i>S. boulardii</i>                                                                                       | partial                     | yes                        | ++                                | ++  | ++  | <b>0</b> | +        | -        |              | ++             |
| <i>L. rhamnosus GG</i>                                                                                    | partial                     | nd                         | -                                 | -   | -   | <b>0</b> | <b>0</b> | -        | <b>0</b>     | ++             |
| <i>L. acidophilus</i>                                                                                     | partial                     | no                         | ++                                |     |     | ++       | -        | -        | +            | <b>0</b>       |
| <i>L. acidophilus</i> +<br><i>L. bifidus</i> +<br><i>L. rhamnosus</i>                                     | partial                     | nd                         |                                   |     |     |          |          |          |              |                |
| <b>Alters microbiota</b>                                                                                  |                             |                            |                                   |     |     |          |          |          |              |                |
| <i>E. coli</i>                                                                                            | nd                          | yes                        |                                   |     | -   |          |          |          |              | +              |
| <i>L. casei</i><br>(DN114001 or Lcr35)                                                                    | nd                          | yes                        | +                                 |     |     |          |          | <b>0</b> | +            | ++             |
| <i>L. reuteri</i> +<br><i>L. fermentum</i>                                                                | nd                          | yes                        |                                   |     |     |          |          |          | ++           |                |
| <i>L. rhamnosus</i> +<br><i>L. fermentum</i>                                                              | nd                          | yes                        |                                   |     |     |          |          |          |              |                |



|                                                                                                                                                                                                                |     |     |   |   |    |    |   |  |   |    |
|----------------------------------------------------------------------------------------------------------------------------------------------------------------------------------------------------------------|-----|-----|---|---|----|----|---|--|---|----|
| <i>L. plantarum</i> +<br><i>Bifido. bifidum</i>                                                                                                                                                                | nd  | yes |   |   |    |    |   |  |   |    |
| <i>L. rhamnosus</i> +<br><i>L. rhamnosus</i> +<br><i>P. freudenreichii</i> +<br><i>Bifido. breve</i>                                                                                                           | nd  | yes |   |   |    | ++ |   |  |   |    |
| <i>L. acidophilus</i> +<br><i>L. plantarum</i> +<br><i>L. rhamnosus</i> +<br><i>Bifido bifidum</i>                                                                                                             | nd- | yes |   |   |    |    |   |  |   |    |
| <i>L. brevis</i> + <i>L.</i><br><i>salivarius</i> + <i>L.</i><br><i>plantarum</i>                                                                                                                              | nd  | yes |   |   |    |    |   |  | + |    |
| <i>L. acidophilus</i> +<br><i>L. paracasei</i> +<br><i>L. delbrueckii ssp.</i><br><i>bulgaricus</i> +<br><i>L. plantarum</i> ,<br><i>Bifido. longum</i> ,<br><i>Bifido. infantis</i> ,<br><i>Bifido. breve</i> | nd  | yes | - |   | ++ | +  |   |  |   | ++ |
| <b>No effect on<br/>microbiota</b>                                                                                                                                                                             |     |     |   |   |    |    |   |  |   |    |
| <i>B. clausii</i>                                                                                                                                                                                              | nd  | nd  |   |   |    |    |   |  | - | -  |
| <i>L. plantarum 299v</i>                                                                                                                                                                                       | nd  | no  | - | - |    | -  |   |  |   |    |
| <i>Bifido. lactis</i>                                                                                                                                                                                          | nd  | no  | + |   |    |    |   |  |   | 0  |
| <i>Bifido. breve</i>                                                                                                                                                                                           | no  | no  |   |   |    |    |   |  |   |    |
| <i>L. acidophilus</i> +<br><i>Bifido. longum</i>                                                                                                                                                               | no  | --  |   |   |    |    |   |  |   |    |
| <i>L. rhamnosus</i> +<br><i>L. reuteri</i>                                                                                                                                                                     | nd  | no  |   |   |    |    |   |  |   | 0  |
| <i>L. casei</i> +<br><i>Bifido. breve</i>                                                                                                                                                                      | nd  | no  |   |   |    |    |   |  |   |    |
| <i>L. paracasei</i> +<br><i>L. acidophilus</i> +<br><i>Bifido animalis</i>                                                                                                                                     | nd  | no  |   |   |    |    |   |  |   |    |
| <b>Pharmacokinetic<br/>only</b>                                                                                                                                                                                |     |     |   |   |    |    |   |  |   |    |
| <i>L. reuteri</i>                                                                                                                                                                                              | nd  | nd  |   |   |    |    |   |  |   | +  |
| <i>L. johnsonii Lal</i>                                                                                                                                                                                        | nd  | nd  |   |   |    | -  |   |  | + |    |
| <i>L. salivarius</i>                                                                                                                                                                                           | nd  | nd  |   |   |    |    | - |  |   |    |
| <i>Bifido. animalis</i>                                                                                                                                                                                        | nd  | nd  |   |   |    |    | 0 |  |   |    |
| <i>Bifido. bifidum</i>                                                                                                                                                                                         | nd  | nd  |   |   |    |    | + |  |   |    |
| <i>L. rhamnosus</i> +<br><i>Bifido. longum</i>                                                                                                                                                                 | nd  | nd  |   |   |    |    |   |  |   |    |

1  
2  
3 \* **Rank:** ++,  $\geq 2$  net RCTs (randomized controlled trials) with significant protective efficacy; +,  
4 only one net protective RCT; 0, equal number of significant and non-significant RCTs; -,  $\geq 1$  net  
5 non-significant RCT. Blank indicates no RCT done for the disease indication.  
6  
7

8  
9 **Abbreviations:** nd, not determined; AAD, antibiotic associated diarrhea; CDI, Clostridium  
10 difficile infections; IBD, inflammatory bowel disease; IBS, irritable bowel syndrome; TD,  
11 traveler's diarrhea; BV, bacterial vaginosis; Acute Ped Diar, treatment of acute pediatric  
12 diarrhea.  
13  
14  
15  
16  
17  
18  
19  
20  
21  
22  
23  
24  
25  
26  
27  
28  
29  
30  
31  
32  
33  
34  
35  
36  
37  
38  
39  
40  
41  
42  
43  
44  
45  
46  
47  
48  
49  
50  
51  
52  
53  
54  
55  
56  
57  
58  
59  
60

For peer review only

**Acknowledgements:**

*The author has been a paid lecturer for the following companies: Biocodex, Inc., Lallemand.*

*The author is a member of the Scientific Advisory Board for BioK Plus International. Biocodex Inc. provided travel expenses for the author to a scientific meeting.*

**Funding:**

*This systematic review was unfunded.*

**Contributorship Statement**

*This manuscript has been read and approved by the author. The listed author contributed to preparing the manuscript and fulfills all the criteria for authorship by the ICMJE. No person or persons other than the author has contributed significantly to its preparation. This manuscript (in full or in part) is not under consideration for publication in any other journal, nor is a duplicative paper.*

**Competing Interests**

*This manuscript was not funded by NIH or any other funding agency. Travel expense reimbursements to attend a future scientific conference will be supported by Biocodex, Inc. The author is a paid lecturer for Biocodex, Inc., Lallemand Inc. and is on the Scientific Advisory Board of BioK-Plus International, but has no stock or equity in any of these companies., nor is she an employee any of these companies. I attest that I have herein disclosed any and all financial or other relationships that could be construed as a conflict of interest and that all sources of financial support for this study have been disclosed and are indicated in the acknowledgements.*

**Data Sharing Statement**

N/A

## References

1. Katan MB. Why the European Food Safety Authority was right to reject health claims for probiotics. *Benef Microbes* 2012 Jun 1;3(2):85-9.
2. Donovan SM, Schneeman B, Gibson GR, Sanders ME. Establishing and evaluating health claims for probiotics. *Amer Soc Nutr Adv Nutri* 2012;3:723-725.
3. European Food Safety Authority (EFSA). Guidance on the scientific requirements for health claims related to gut and immune function. *EFSA Journal* 2011;9(4):1984.
4. Binnendijk KH, Rijkers GT. What is a health benefit? An evaluation of EFSA opinions on health benefits with reference to probiotics. *Benef Microbes* 2013 Sep;4(3):223-30.
5. McFarland LV. Systematic review and meta-analysis of *Saccharomyces boulardii* in adult patients. *World J Gastroenterol* 2010;16(18):2202-22.
6. Buts JP, Stilmant C, Bernasconi P, Neirinck C, De Keyser N. Characterization of alpha,alpha-trehalase released in the intestinal lumen by the probiotic *Saccharomyces boulardii*. *Scand J Gastroenterol* 2008;43(12):1489-96.
7. McFarland LV. Antibiotic-associated diarrhea: epidemiology, trends and treatment. *Future Microbiol* 2008;3(5):563-578.
8. Dethlefsen L, Huse S, Sogin ML, Relman DA. The Pervasive Effects of an Antibiotic on the Human Gut Microbiota, as Revealed by Deep 16S rRNA Sequencing. *PLoS Biol* 2008;6(11):e280.
9. McFarland LV. Normal flora: diversity and functions. *Microb Ecol Health Dis* 2000;12:193-207.
10. Sanders ME. Impact of probiotics on colonizing microbiota of the gut. *J Clin Gastroenterol* 2011;45(3):S115-S119.
11. Young VB, Schmidt TM. Antibiotic-associated diarrhea accompanied by large-scale alterations in the composition of the fecal microbiota. *J Clin Microbiol* 2004 Mar;42(3):1203-6.
12. Nylund L, Satokari R, Nikkilä J, Rajilić-Stojanović M, Kalliomäki M, Isolauri E, Salminen S, de Vos WM. Microarray analysis reveals marked intestinal microbiota aberrancy in infants having eczema compared to healthy children in at-risk for atopic disease. *BMC Microbiol* 2013 Jan 23;13:12.
13. Prince T, McBain AJ, O'Neill CA. *Lactobacillus reuteri* protects epidermal keratinocytes from *Staphylococcus aureus*-induced cell death by competitive exclusion. *Appl Environ Microbiol* 2012;78(15):5119-26.

- 1  
2  
3 14. Vitali B, Cruciani F, Baldassarre ME, Capursi T, Spisni E, Valerii MC, Candela M, Turrone S,  
4  
5 Brigidi P. Dietary supplementation with probiotics during late pregnancy: outcome on vaginal  
6  
7 microbiota and cytokine secretion. *BMC Microbiol* 2012;12:236.
- 8  
9 15. Nugent RP, Krohn MA, Hillier SL. Reliability of diagnosing bacterial vaginosis is improved by a  
10  
11 standardized method of gram stain interpretation. *J Clin Microbiol* 1991;29(2):297-301.
- 12  
13 16. Ciprandi G, Vizzaccaro A, Cirillo I, Tosca MA. *Bacillus clausii* exerts immuno-modulatory activity  
14  
15 in allergic subjects: a pilot study. *Eur Ann Allergy Clin Immunol* 2005;37(4):129-34.
- 16  
17 17. Marseglia GL, Tosca M, Cirillo I, Licari A, Leone M, Marseglia A, Castellazzi AM, Ciprandi G.  
18  
19 Efficacy of *Bacillus clausii* spores in the prevention of recurrent respiratory infections in  
20  
21 children: a pilot study. *Ther Clin Risk Manag* 2007;3(1):13-7.
- 22  
23 18. Iniesta M, Herrera D, Montero E, Zurbriggen M, Matos AR, Marín MJ, Sánchez-Beltrán MC,  
24  
25 Llama-Palacio A, Sanz M. Probiotic effects of orally administered *Lactobacillus reuteri*-  
26  
27 containing tablets on the subgingival and salivary microbiota in patients with gingivitis. A  
28  
29 randomized clinical trial. *J Clin Periodontol* 2012;39(8):736-44.
- 30  
31 19. Shah MP, Gujjari SK, Chandrasekhar VS. Evaluation of the effect of probiotic (inersan®) alone,  
32  
33 combination of probiotic with doxycycline and doxycycline alone on aggressive periodontitis - a  
34  
35 clinical and microbiological study. *J Clin Diagn Res* 2013;7(3):595-600
- 36  
37 20. Teughels W, Durukan A, Ozcelik O, Pauwels M, Quirynen M, Haytac MC. Clinical and  
38  
39 microbiological effects of *Lactobacillus reuteri* probiotics in the treatment of chronic  
40  
41 periodontitis: a randomized placebo-controlled study. *J Clin Periodontol* 2013;40(11):1025-35.
- 42  
43 21. Kleessen B, Bezirtzoglou E, Matto J. culture-based knowledge on biodiversity, development and  
44  
45 stability of human gastrointestinal microflora. *Micro Ecol in Health and Dis* 2000;12 (S2):53-63.
- 46  
47 22. Schmeisser C, Steele H, Streit WR. Metagenomics, biotechnology with non-culturable microbes.  
48  
49 *Appl Microbiol Biotechnol* 2007 Jul;75(5):955-62.
- 50  
51 23. Preidis GA, Versalovic J. Targeting the human microbiome with antibiotics, probiotics, and  
52  
53 prebiotics: gastroenterology enters the metagenomics era. *Gastroenterol* 2009;136(6):2015-31.  
54  
55 PMID: 19462507.
- 56  
57 24. Aagaard K, Petrosino J, Keitel W, Watson M, Katancik J, Garcia N, Patel S, Cutting M, Madden T,  
58  
59 Hamilton H, Harris E, Gevers D, Simone G, McInnes P, Versalovic J. The Human Microbiome  
60  
Project strategy for comprehensive sampling of the human microbiome and why it matters.  
*FASEB J* 2013;27(3):1012-22.

- 1  
2  
3 25. Handelsman J. Metagenomics: application of genomics to uncultured microorganisms. *Micro and*  
4 *Molecular Biol Review* 2004;68(4):669-685.  
5  
6  
7 26. Gill SR, Pop M, Deboy RT, Eckburg PB, Turnbaugh PJ, Samuel BS, Gordon JI, Relman DA,  
8 Fraser-Liggett CM, Nelson KE. Metagenomic analysis of the human distal gut microbiome.  
9 *Science* 2006;312(5778):1355-9.  
10  
11  
12 27. Frank DN, Pace NR. Gastrointestinal microbiology enters the metagenomics era. *Curr Opin*  
13 *Gastroenterol* 2008; 24:4-10.  
14  
15  
16 28. Swidsinski A, Loening-Baucke V, Kirsch S, Doerffel Y. Functional biostructure of colonic  
17 microbiota (central fermenting area, germinal stock area and separating mucus layer) in healthy  
18 subjects and patients with diarrhea treated with *Saccharomyces boulardii*. *Gastroenterol Clin*  
19 *Biol* 2010;34 Suppl 1:S79-92.  
20  
21  
22 29. Sanders ME, Guarner F, Guerrant R, Holt PR, Quigley EMM, Sartor RB, Sherman PM, Mayer EA.  
23 An update on the use and investigation of probiotics in health and disease. *Gut* 2013;62:787-796.  
24  
25  
26 30. Moher D, Liberati A, Tetzlaff J, Altman DG, The PRISMA Group. Preferred Reporting Items for  
27 Systematic Reviews and Meta-Analyses: The PRISMA Statement. *BMJ* 2009;339: 332-336.  
28  
29  
30 31. Franks AH, Harmsen HJ, Raangs GC, Jansen GJ, Schut F, Welling GW Variations of bacterial  
31 populations in human feces measured by fluorescent *in situ* hybridization with group-specific  
32 16S rRNA-targeted oligonucleotide probes. *Appl Environ Microbiol* 1998;64(9):3336-45.  
33  
34  
35 32. Wada M, Nagata S, Saito M, Shimizu T, Yamashiro Y, Matsuki T, Asahara T, Nomoto K. Effects  
36 of the enteral administration of *Bifidobacterium breve* on patients undergoing chemotherapy for  
37 pediatric malignancies. *Support Care Cancer* 2010;18(6):751-9.  
38  
39  
40 33. Odamaki T, Xiao JZ, Iwabuchi N, Sakamoto M, Takahashi N, Kondo S, Miyaji K, Iwatsuki K,  
41 Togashi H, Enomoto T, Benno Y. Influence of *Bifidobacterium longum* BB536 intake on faecal  
42 microbiota in individuals with Japanese cedar pollinosis during the pollen season. *J Med*  
43 *Microbiol* 2007;56(Pt 10):1301-8.  
44  
45  
46 34. Seki H, Shiohara M, Matsumura T, Miyagawa N, Tanaka M, Komiyama A, Kurata S. Prevention of  
47 antibiotic-associated diarrhea in children by *Clostridium butyricum* MIYAIRI. *Pediatrics*  
48 *International* 2003; 45: 86-90.  
49  
50  
51 35. Mustafa RA, Santesso N, Brozek J, Akl EA, Walter SD, et al. The GRADE approach is  
52 reproducible in assessing the quality of evidence of quantitative evidence syntheses. *J Clin*  
53 *Epidemiol* 2013;66(7):736-42  
54  
55  
56  
57  
58  
59  
60

- 1  
2  
3 36. McFarland LV. Meta-analysis of probiotics for prevention of antibiotic associated diarrhea and  
4 treatment of *Clostridium difficile* disease. *Am J Gastroenterol* 2006;101:812-822.  
5  
6  
7 37. McFarland LV, Goh S. Preventing Pediatric Antibiotic-Associated Diarrhea and *Clostridium*  
8 *difficile* Infections with Probiotics: a meta-analysis. *World J Meta-analysis* 2013;1(3): 102-120.  
9  
10 38. Goldenberg JZ, Ma SS, Saxton JD, Martzen MR, Vandvik PO, Thorlund K, Guyatt GH, Johnston  
11 BC. Probiotics for the prevention of *Clostridium difficile*-associated diarrhea in adults and  
12 children. *Cochrane Database Syst Rev* 2013;5:CD006095.  
13  
14 39. Shen J, Zuo Z, Mao A. Effect of probiotics on inducing remission and maintaining therapy in  
15 ulcerative colitis, Crohn's disease, and pouchitis: meta-analysis of randomized controlled trials.  
16 *Inflamm Bowel Dis* 2014; 20(1): 21-35.  
17  
18 40. McFarland LV and Dublin S. Meta-analysis of probiotics for the treatment of irritable bowel  
19 syndrome. *World J Gastroenterol* 2008;14(17):2650-61.  
20  
21 41. McFarland LV. Meta-analysis of probiotics for the prevention of traveler's diarrhea. *Travel Med*  
22 *Infect Dis* 2007; 5(2):97-105.  
23  
24 42. Huang H, Song L, Zhao W. Effects of probiotics for the treatment of bacterial vaginosis in adult  
25 women: a meta-analysis of randomized controlled trials. *Arch Gynecol Obstet* 2013 Dec; epub.  
26  
27 43. McFarland LV, Elmer GW and McFarland M. Meta-analysis of Probiotics for the Prevention and  
28 Treatment of Acute Pediatric Diarrhea. *Internl J Probiotics Prebiotics* 2006; 1(1):63-76.  
29  
30 44. Dinleyici EC, Eren M, Ozen M, Yargic ZA, Vandenplas Y. Effectiveness and safety of  
31 *Saccharomyces boulardii* for acute infectious diarrhea. *Expert Opin Biol Ther* 2012  
32 Apr;12(4):395-410.  
33  
34 45. Szajewska H, Ruszczyński M, Kolaček S. Meta-analysis shows limited evidence for using  
35 *Lactobacillus acidophilus* LB to treat acute gastroenteritis in children. *Acta Paediatr* 2013 Oct  
36 31. ePub.  
37  
38 46. Alvaro E, Andrieux C, Rochet V, Rigottier-Gois L, Lepercq P, Sutren M, Galan P, Duval Y, Juste  
39 C, Dore J. Composition and metabolism of the intestinal microbiota in consumers and non-  
40 consumers of yogurt. *Br J Nutr* 2007;97:126-133.  
41  
42 47. Zubadalashvili NG, Makhviladze MA, Diasamidze MT, Abdulashvili INN. [The comparative study  
43 of Linex and Lacto-G in treatment of adult patients with disbacteriosis]. Russian. *Georgian Med*  
44 *News* 2009;170:38-42  
45  
46  
47  
48  
49  
50  
51  
52  
53  
54  
55  
56  
57  
58  
59  
60

- 1  
2  
3 48. Klein SM, Elmer GW, McFarland LV, Surawicz CM, Levy RH. Recovery and elimination of the  
4  
5 biotherapeutic agent, *Saccharomyces boulardii*, in healthy human volunteers. *Pharm Res*  
6  
7 1993;10(11):1615-9.
- 8  
9 49. Rochet V, Rigottier-Gois L, Ledaire A, Andrieux C, Sutren M, Rabot S, Mogenet A, Bresson JL,  
10  
11 Cools S, Picard C, Goupil-Feuillerat N, Doré J. Survival of *Bifidobacterium animalis* DN-173  
12  
13 010 in the faecal microbiota after administration in lyophilised form or in fermented product - a  
14  
15 randomised study in healthy adults. *J Mol Microbiol Biotechnol* 2008;14(1-3):128-36. PMID:  
16  
17 17957120.
- 18 50. Engelbrekton AL, Korzenik JR, Sanders ME, Clement BG, Leyer G, Klaenhammer TR, Kitts CL.  
19  
20 Analysis of treatment effects on the microbial ecology of the human intestine. *FEMS Microbiol*  
21  
22 *Ecol* 2006;57(2):239-50.
- 23 51. Zoppi G, Cinquetti M, Benini A, Bonamini E, Minelli EB. Modulation of the intestinal ecosystem  
24  
25 by probiotics and lactulose in children during treatment with ceftriaxone. *Current Therapeutic*  
26  
27 *Research* 2001;62(5):418-35.
- 28 52. Orrhage K, Brismar B, Nord CE. Effects of supplements of *Bifidobacterium longum* and  
29  
30 *Lactobacillus acidophilus* on the intestinal microbiota during administration of clindamycin.  
31  
32 *Microbial Ecology in Health and Disease* 1994; 7: 17-25.
- 33 53. Larsen N, Vogensen FK, Gøbel R, Michaelsen KF, Abu Al-Soud W, Sørensen SJ, Hansen LH,  
34  
35 Jakobsen M. Predominant genera of fecal microbiota in children with atopic dermatitis are not  
36  
37 altered by intake of probiotic bacteria *Lactobacillus acidophilus* NCFM and *Bifidobacterium*  
38  
39 *animalis* subsp. *lactis* Bi-07. *FEMS Microbiol Ecol* 2011;75(3):482-96.
- 40 54. Lidbeck A, Edlund C, Gustafsson JA, Kager L, Nord CE. Impact of *Lactobacillus acidophilus* on  
41  
42 the normal intestinal microflora after administration of two antimicrobial agents. *Infection*  
43  
44 1988;16(6):329-36.
- 45 55. Black F, Einarsson K, Lidbeck A, Orrhage K, Nord CE. Effect of lactic acid producing bacteria on  
46  
47 the human intestinal microflora during ampicillin treatment. *Scand J Infect Dis* 1991;23(2):247-  
48  
49 54.
- 50  
51 56. Jernberg C, Sullivan A, Edlund C, Jansson JK. Monitoring of antibiotic-induced alterations in the  
52  
53 human intestinal microflora and detection of probiotic strains by use of terminal restriction  
54  
55 fragment length polymorphism. *Appl Environ Microbiol* 2005 Jan;71(1):501-6.
- 56  
57  
58  
59  
60



- 1  
2  
3 57. Madden JA, Plummer SF, Tang J, Garaiova I, Plummer NT, Herbison M, Hunter JO, Shimada T,  
4 Cheng L, Shirakawa T. Effect of probiotics on preventing disruption of the intestinal microflora  
5 following antibiotic therapy: a double-blind, placebo-controlled pilot study. *Int*  
6 *Immunopharmacol* 2005;5(6):1091-7.  
7  
8  
9  
10 58. Plummer SF, Garaiova I, Sarvotham T, Cottrell SL, Le Scouiller S, Weaver MA, Tang J, Dee P,  
11 Hunter J. Effects of probiotics on the composition of the intestinal microbiota following  
12 antibiotic therapy. *Int J Antimicrob Agents* 2005;26(1):69-74.  
13  
14  
15 59. van der Aa LB, Heymans HS, van Aalderen WM, Sillevius Smitt JH, Knol J, Ben Amor K, Goossens  
16 DA, Sprikkelman AB; Synbad Study Group. Effect of a new synbiotic mixture on atopic  
17 dermatitis in infants: a randomized-controlled trial. *Clin Exp Allergy* 2010 May;40(5):795-804.  
18  
19  
20 60. Lata J, Novotný I, Příbramská V, Juránková J, Fric P, Kroupa R, Stibůrek O. The effect of  
21 probiotics on gut flora, level of endotoxin and Child-Pugh score in cirrhotic patients: results of a  
22 double-blind randomized study. *Eur J Gastroenterol Hepatol* 2007;19(12):1111-3.  
23  
24  
25 61. Petricevic L, Witt A. The role of *Lactobacillus casei rhamnosus* Lcr35 in restoring the normal  
26 vaginal flora after antibiotic treatment of bacterial vaginosis. *BJOG* 2008;115(11):1369-74.  
27  
28  
29 62. Nobaek S, Johansson ML, Molin G, Ahrne S, Jeppsson B. Alteration of intestinal microflora is  
30 associated with reduction in abdominal bloating and pain in patients with irritable bowel  
31 syndrome. *Am J Gastroenterol* 2000;95(5):1231-1238.  
32  
33  
34 63. Klarin B, Johansson ML, Molin G, Larsson A, Jeppsson B. Adhesion of the probiotic bacterium  
35 *Lactobacillus plantarum* 299v onto the gut mucosa in critically ill patients: a randomised open  
36 trial. *Crit Care* 2005;9(3):R285-93.  
37  
38  
39 64. Klarin B, Molin G, Jeppsson B, Larsson A. Use of the probiotic *Lactobacillus plantarum* 299 to  
40 reduce pathogenic bacteria in the oropharynx of intubated patients: a randomised controlled open  
41 pilot study. *Crit Care* 2008;12(6):R136.  
42  
43  
44 65. Girard-Pipau F, Pompei A, Schneider S, Nano JL, Hebuterne X, Boquet P, Rampal P. Intestinal  
45 microflora, short chain and cellular fatty acids, influence of a probiotic *S. boulardii*. *Microb*  
46 *Ecology Health Dis* 2002; 14:220-227.  
47  
48  
49 66. Swidsinski A, Loening-Baucke V, Verstraelen H, Osowska S, Doerffel Y. Biostructure of fecal  
50 microbiota in healthy subjects and patients with chronic idiopathic diarrhea. *Gastroenterology*  
51 2008;135(2):568-79.  
52  
53  
54  
55  
56  
57  
58  
59  
60

- 1  
2  
3 67. Reid G, Beuerman D, Heinemann C, Bruce AW. Probiotic *Lactobacillus* dose required to restore and  
4 maintain a normal vaginal flora. *FEMS Immunol Med Microbiol* 2001;32(1):37-41.  
5  
6  
7 68. Reid G, Charbonneau D, Erb J, Kochanowski B, Beuerman D, Poehner R, Bruce AW. Oral use of  
8  
9 *Lactobacillus rhamnosus* GR-1 and *L. fermentum* RC-14 significantly alters vaginal flora:  
10 randomized, placebo-controlled trial in 64 healthy women. *FEMS Immunol Med Microbiol* 2003;  
11 35: 131-4.  
12  
13  
14 69. Kirpich IA, Solovieva NV, Leikhter SN, Shidakova NA, Lebedeva OV, Sidorov PI, Bazhukova TA,  
15 Soloviev AG, Barve SS, McClain CJ, Cave M. Probiotics restore bowel flora and improve liver  
16 enzymes in human alcohol-induced liver injury: a pilot study. *Alcohol* 2008 Dec;42(8):675-82.  
17  
18  
19 70. Hummelen R, Changalucha J, Butamanya NL, Cook A, Habbema JD, Reid G. *Lactobacillus*  
20  
21 *rhamnosus* GR-1 and *L. reuteri* RC-14 to prevent or cure bacterial vaginosis among women with  
22 HIV. *Int J Gynaecol Obstet* 2010;111(3):245-8.  
23  
24  
25 71. Uchida K, Takahashi T, Inoue M, Morotomi M, Otake K, Nakazawa M, Tsukamoto Y, Miki C,  
26 Kusunoki M. Immunonutritional effects during synbiotics therapy in pediatric patients with short  
27 bowel syndrome. *Pediatr Surg Int* 2007;23(3):243-8.  
28  
29  
30 72. Mastromarino P, Macchia S, Meggiorini L, Trinchieri V, Mosca L, Perluigi M, Midulla C.  
31 Effectiveness of *Lactobacillus*-containing vaginal tablets in the treatment of symptomatic  
32 bacterial vaginosis. *Clin Microbiol Infect* 2009;15(1):67-74.  
33  
34  
35 73. Roessler A, Forssten SD, Gleis M, Ouwehand AC, Jahreis G. The effect of probiotics on faecal  
36 microbiota and genotoxic activity of faecal water in patients with atopic dermatitis: a  
37 randomized, placebo-controlled study. *Clin Nutr* 2012;31(1):22-9.  
38  
39  
40 74. Kajander K, Hatakka K, Pousa T, Farkkila M, Korpela R. A probiotic mixture alleviates symptoms  
41 in irritable bowel syndrome patients: a controlled 6 month intervention. *Aliment Pharmacol Ther*  
42 2005;22:387-94.  
43  
44  
45 75. Lyra A, Krogius-Kurikka L, Nikkilä J, Malinen E, Kajander K, Kurikka K, Korpela R, Palva A.  
46 Effect of a multispecies probiotic supplement on quantity of irritable bowel syndrome-related  
47 intestinal microbial phylotypes. *BMC Gastroenterol* 2010;10:110.  
48  
49  
50 76. Wong VW, Tse CH, Lam TT, Wong GL, Chim AM, Chu WC, Yeung DK, Law PT, Kwan HS, Yu  
51 J, Sung JJ, Chan HL. Molecular characterization of the fecal microbiota in patients with  
52 nonalcoholic steatohepatitis--a longitudinal study. *PLoS One* 2013 Apr 25;8(4):e62885.  
53  
54  
55  
56  
57  
58  
59  
60

- 1  
2  
3 77. Venturi A, Gionchetti P, Rizzello F, Johansson R, Zucconi E, Brigidi P, Matteuzzi D, Campieri M.  
4 Impact on the composition of the faecal flora by a new probiotic preparation: preliminary data on  
5 maintenance treatment of patients with ulcerative colitis. *Aliment Pharmacol Ther*  
6 1999;13(8):1103-8.  
7  
8  
9  
10 78. Brigidi P, Vitali B, Swennen E, Bazzocchi G, Matteuzzi D. Effects of probiotic administration  
11 upon the composition and enzymatic activity of human fecal microbiota in patients with irritable  
12 bowel syndrome or functional diarrhea. *Res Microbiol* 2001; 152:735-41.  
13  
14 79. Kuhbacher T, Ott SJ, Helwig U, Mimura T, Rizzello F, et al. Bacterial and fungal microbiota in  
15 relation to probiotic therapy (VSL#3) in pouchitis. *Gut* 2006;55:833-41.  
16  
17 80. Ng SC, Lam ERC, Lam TTY, Chan T, Law W, Tse TCH, Kamm MA, Sung JJY, Chan FKL, Wu  
18 JCY. Effect of probiotic bacteria on the intestinal microbiota in irritable bowel syndrome. *J*  
19 *Gastroenterol Hepatol* 2013; 28:1624-1631.  
20  
21 81. Oswari H, Prayitno L, Dwipoerwantoro PG, Firmansyah A, Makrides M, Lawley B, Kuhn-Sherlock  
22 B, Cleghorn G, Tannock GW. Comparison of stool microbiota compositions, stool alpha1-  
23 antitrypsin and calprotectin concentrations, and diarrhoeal morbidity of Indonesian infants fed  
24 breast milk or probiotic/prebiotic-supplemented formula. *J Paediatr Child Health* 2013 June 18,  
25 ePub.  
26  
27 82. Langhendries JP, Detry J, Van Hees J, Lamboray M, Darimont J, Mozin MJ, Secretin C, Senterre J.  
28 Effect of a fermented infant formula containing viable Bifidobacteria on the fecal flora  
29 composition and pH of healthy full-term infants. *J Ped Gastroenterol Nutr* 1995;21:177-81.  
30  
31 83. Benno Y, Mitsuoka T. Impact of *Bifidobacterium longum* on human fecal microflora. *Microbiol*  
32 *Immunol* 1992;36(7):683-94.  
33  
34 84. Fujiwara S, Seto Y, Kimura A, Hashiba H. Intestinal transit of an orally administered streptomycin-  
35 rifampicin-resistant variant of *Bifidobacterium longum* SBT2928: its long-term survival and  
36 effect on the intestinal microflora and metabolism. *J Applied Microbiology* 2001; 90: 43-52.  
37  
38 85. Harmsen HJ, Raangs GC, Franks AH, Wildeboer-Veloo A, Welling G. The effect of the prebiotic  
39 inulin and the probiotic *Bifidobacterium longum* on the fecal microflora of healthy volunteers  
40 measured by FISH and DGGE. *Micro Ecol Health Dis* 2002; 14:211-219.  
41  
42 86. Guerin-Danan C, Chabanet C, Pedone C, Popot F, Vaissade P, Bouley C, Szylit O, Andrieux C.  
43 Milk fermented with yogurt cultures and *Lactobacillus casei* compared with yogurt and gelled  
44 milk: influence on intestinal microflora in healthy infants. *Am J Clin Nutri* 1998;67:111-117.  
45  
46  
47  
48  
49  
50  
51  
52  
53  
54  
55  
56  
57  
58  
59  
60

- 1  
2  
3 87. Rochet V, Rigottier-Gois L, Sutren M, Kremetscki MN, Andrieux C, Furet JP, Tailliez P, Levenez  
4 F, Mogenet A, Bresson JL, Méance S, Cayuela C, Leplingard A, Doré J. Effects of orally  
5 administered *Lactobacillus casei* DN-114 001 on the composition or activities of the dominant  
6 faecal microbiota in healthy humans. *Br J Nutr* 2006;95(2):421-9.  
7  
8  
9  
10 88. Rochet V, Rigottier-Gois L, Levenez F, Cadiou J, Marteau P, Bresson JL, Goupil-Feillerat N, Doré  
11 J. Modulation of *Lactobacillus casei* in ileal and fecal samples from healthy volunteers after  
12 consumption of a fermented milk containing *Lactobacillus casei* DN-114 001. *Can J Microbiol*  
13 2008 Aug;54(8):660-7.  
14  
15  
16  
17 89. Brunser O, Gotteland M, Cruchet S, Figueroa G, Garrido D, Steenhout P. Effect of a milk formula  
18 with prebiotics on the intestinal microbiota of infants after an antibiotic treatment. *Pediatric*  
19 *Research* 2006;59(3):451-6.  
20  
21  
22  
23 90. Goossens D, Jonkers D, Russel M, Stobberingh E, Van Den Bogaard A, Stockbrügger R. The effect  
24 of *Lactobacillus plantarum* 299v on the bacterial composition and metabolic activity in faeces of  
25 healthy volunteers: a placebo-controlled study on the onset and duration of effects. *Aliment*  
26 *Pharmacol Ther* 2003;18(5):495-505.  
27  
28  
29  
30 91. Goossens D, Jonkers D, Russel M, Thijs A, van den Bogaard A, Stobberingh E, Stockbrügger  
31 R. Survival of the probiotic, *L. plantarum* 299v and its effects on the faecal bacterial flora, with  
32 and without gastric acid inhibition. *Dig Liver Dis* 2005;37(1):44-50.  
33  
34  
35  
36 92. Goossens DA, Jonkers DM, Russel MG, Stobberingh EE, Stockbrügger RW. The effect of a  
37 probiotic drink with *Lactobacillus plantarum* 299v on the bacterial composition in faeces and  
38 mucosal biopsies of rectum and ascending colon. *Aliment Pharmacol Ther* 2006;23(2):255-63.  
39  
40  
41 93. Berggren A, Soderberg L, Onning G, Hagslatt M, Axelsson I. Intestinal function, microflora and  
42 nutrient intake of children after administration of a fermented oat product containing  
43 *Lactobacillus plantarum* DSM 9843(299v). *Microb Ecol Health Dis* 2003;15:160-168.  
44  
45  
46 94. Karlsson C, Ahrné S, Molin G, Berggren A, Palmquist I, Fredrikson GN, Jeppsson B. Probiotic  
47 therapy to men with incipient arteriosclerosis initiates increased bacterial diversity in colon: a  
48 randomized controlled trial. *Atherosclerosis* 2010;208(1):228-33.  
49  
50  
51 95. Gueimonde M, Sakata S, Kalliomäki M, Isolauri E, Benno Y, Salminen S. Effect of maternal  
52 consumption of lactobacillus GG on transfer and establishment of fecal bifidobacterial  
53 microbiota in neonates. *J Pediatr Gastroenterol Nutr* 2006;42(2):166-70.  
54  
55  
56  
57  
58  
59  
60

- 1  
2  
3 96. Sierra S, Lara-Villoslada F, Sempere L, Olivares M, Boza J, Xaus J. Intestinal and immunological  
4 effects of daily oral administration of *Lactobacillus salivarius* CECT5713 to healthy adults.  
5 *Anaerobe* 2010;16(3):195-200.  
6  
7  
8 97. Vanhoutte T, De Preter V, De Brandt E, Verbeke K, Swings J, Huys G. Molecular monitoring of the  
9 fecal microbiota of healthy human subjects during administration of lactulose and  
10 *Saccharomyces boulardii*. *Appl Environ Microbiol* 2006;72(9):5990-7.  
11  
12  
13 98. Zhong Y, Huang CY, He T, Harmsen HM. [Effect of probiotics and yogurt on colonic microflora in  
14 subjects with lactose intolerance]. *Wei Sheng Yan Jiu* 2006;35(5):587-91. Chinese.  
15  
16  
17 99. He T, Priebe MG, Zhong Y, Huang C, Harmsen HJ, Raangs GC, Antoine JM, Welling GW, Vonk  
18 RJ. Effects of yogurt and bifidobacteria supplementation on the colonic microbiota in lactose-  
19 intolerant subjects. *J Appl Microbiol* 2008;104(2):595-604.  
20  
21  
22 100. Yang YJ, Sheu BS. Probiotics-containing yogurts suppress *Helicobacter pylori* load and modify  
23 immune response and intestinal microbiota in the *Helicobacter pylori*-infected children.  
24 *Helicobacter* 2012;17(4):297-304.  
25  
26  
27 101. Mah KW, Chin VI, Wong WS, Lay C, Tannock GW, Shek LP, Aw MM, Chua KY, Wong HB,  
28 Panchalingham A, Lee BW. Effect of a milk formula containing probiotics on the fecal  
29 microbiota of Asian infants at risk of atopic diseases. *Pediatr Res* 2007;62(6):674-9.  
30  
31  
32 102. Rafter J, Bennett M, Caderni G, Clune Y, Hughes R, Karlsson PC, Klinder A, O'Riordan M,  
33 O'Sullivan GC, Pool-Zobel B, Rechkemmer G, Roller M, Rowland I, Salvadori M, Thijs H, Van  
34 Loo J, Watzl B, Collins JK. Dietary synbiotics reduce cancer risk factors in polypectomized and  
35 colon cancer patients. *Am J Clin Nutr* 2007;85(2):488-96.  
36  
37  
38 103. Kubota A, He F, Kawase M, Harata G, Hiramatsu M, Salminen S, Iino H. Lactobacillus strains  
39 stabilize intestinal microbiota in Japanese cedar pollinosis patients. *Microbiol Immunol*  
40 2009;53(4):198-205.  
41  
42  
43 104. Morelli L, Zonenschain D, Callegari ML, Grossi E, Maisano F, Fusillo M. Assessment of a new  
44 synbiotic preparation in healthy volunteers: survival, persistence of probiotic strains and its  
45 effect on the indigenous flora. *Nutr J* 2003;2:11.  
46  
47  
48 105. Sullivan A, Nord CE, Evengard B. Effect of supplement with lactic-acid producing bacteria on  
49 fatigue and physical activity in patients with chronic fatigue syndrome. *Nutr J* 2009;8:1-6.  
50  
51  
52 106. McNulty NP, Yatsunencko T, Hsiao A, Faith JJ, Muegge BD, Goodman AL, Henrissat B, Oozeer R,  
53 Cools-Portier S, Gobert G, Chervaux C, Knights D, Lozupone CA, Knight R, Duncan AE, Bain  
54  
55  
56  
57  
58  
59  
60

- 1  
2  
3 JR, Muehlbauer MJ, Newgard CB, Heath AC, Gordon JI. The impact of a consortium of  
4 fermented milk strains on the gut microbiome of gnotobiotic mice and monozygotic twins. *Sci*  
5 *Transl Med* 2011;3(106):106ra106.  
6  
7  
8  
9 107. Guarner F, Khan AG, Garisch J, Eliakim R, Gangl A, Thomson A, Krabshuis J, Lemair T,  
10 Kaufmann P, de Paula JA, Fedorak R, Shanahan F, Sanders ME, Szajewska H, Ramakrishna BS,  
11 Karakan T, Kim N; World Gastroenterology Organization. World Gastroenterology Organisation  
12 Global Guidelines: probiotics and prebiotics October 2011. *J Clin Gastroenterol*  
13 2012;46(6):468-81.  
14  
15  
16  
17 108. United States Department of Health and Human Services Food and Drug Administration, Center  
18 for Food Safety and Applied Nutrition. Dietary Supplements Guidance Documents and  
19 Regulatory Information. 2008. Available at:  
20 <http://www.fda.gov/food/guidanceregulation/guidancedocumentsregulatoryinformation/dietarysupplments/default.htm>. Accessed: November 18, 2013.  
21  
22  
23  
24  
25  
26 109. Barc MC, Charrin-Sarnel C, Rochet V, Bourlioux F, Sandré C, Boureau H, Doré J, Collignon A.  
27 Molecular analysis of the digestive microbiota in a gnotobiotic mouse model during antibiotic  
28 treatment: Influence of *Saccharomyces boulardii*. *Anaerobe* 2008;14(4):229-33.  
29  
30  
31 110. O'Hara AM, Shanahan F. The gut flora as a forgotten organ. *EMBO Reports* 2006;7:688-693.  
32  
33 111. Masood MI, Qadir MI, Shirazi JH, Khan IU. Beneficial effects of lactic acid bacteria on human  
34 beings. *Crit Rev Microbiol* 2011;37(1):91-8.  
35  
36  
37 112. Rijkers GT, de Vos WM, Brummer RJ, Morelli L, Corthier G, Marteau P. Health benefits and  
38 health claims of probiotics: bridging science and marketing. *Br J Nutr* 2011;106(9):1291-6.  
39  
40  
41  
42  
43  
44  
45  
46  
47  
48  
49  
50  
51  
52  
53  
54  
55  
56  
57  
58  
59  
60

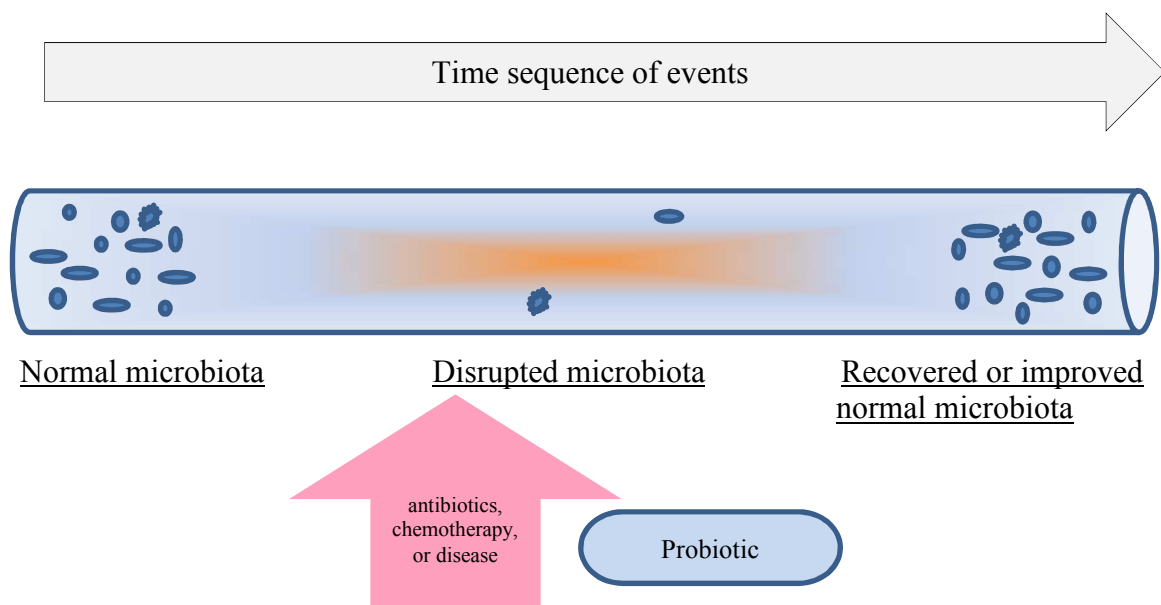

| Model | Type of population enrolled                | Dysbiosis | Time microbiota disrupted | Probiotic or control intervention | Potential outcomes  |
|-------|--------------------------------------------|-----------|---------------------------|-----------------------------------|---------------------|
| A     | Healthy volunteers or at-risk patients     | no        | post-baseline             | preventive                        | restoration         |
| B     | Patients with active disease at enrollment | yes       | pre-baseline              | treatment                         | altered or improved |
| C     | Healthy volunteers                         | no        | not disrupted             | preventive                        | no change           |

1  
2  
3  
4  
5  
6  
7  
8  
9  
10  
11  
12  
13  
14  
15  
16  
17  
18  
19  
20  
21  
22  
23  
24  
25  
26  
27  
28  
29  
30  
31  
32  
33  
34  
35  
36  
37  
38  
39  
40  
41  
42  
43  
44  
45  
46  
47  
48  
49  
50  
51  
52  
53  
54  
55  
56  
57  
58  
59  
60

1  
2  
3  
4  
5  
6  
7  
8  
9  
10  
11  
12  
13  
14  
15  
16  
17  
18  
19  
20  
21  
22  
23  
24  
25  
26  
27  
28  
29  
30  
31  
32  
33  
34  
35  
36  
37  
38  
39  
40  
41  
42  
43  
44  
45  
46  
47  
48  
49  
50  
51  
52  
53  
54  
55  
56  
57  
58  
59  
60

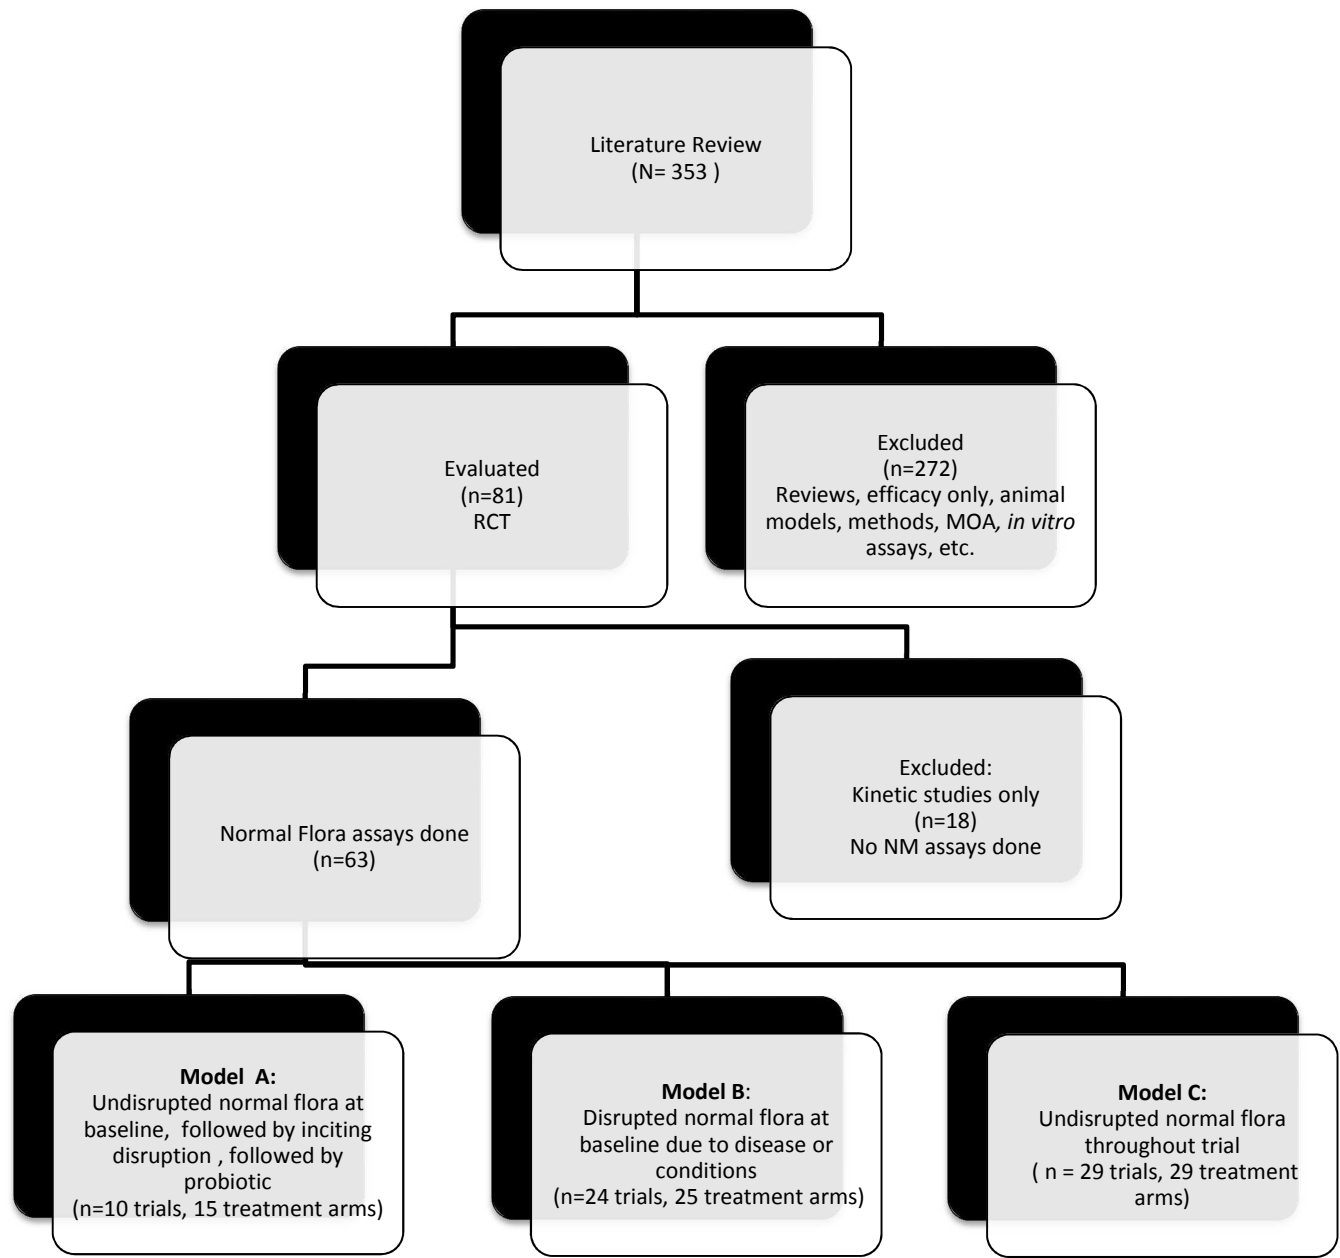



## PRISMA Checklist

| Item | Topic                                                                                                      | Reported on page |
|------|------------------------------------------------------------------------------------------------------------|------------------|
| 1    | Title includes systematic review                                                                           | 1                |
| 2    | Structured abstract/summary                                                                                | 2                |
| 3    | Introduction: rationale for review                                                                         | 4                |
| 4    | Introduction: questions addressed (PICOS)-participants, interventions, comparisons, outcomes, study design | 4-5              |
| 5    | Methods: Registration for protocol                                                                         | 2                |
| 6    | Methods : Eligibility criteria                                                                             | 6                |
| 7    | Methods: Information sources & databases                                                                   | 5-6              |
| 8    | Methods: search strategy                                                                                   | 5                |
| 9    | Methods: study selections (screening, eligibility)                                                         | 6                |
| 10   | Methods: method of data extraction                                                                         | 6                |
| 11   | Methods: define all data items & variables sought                                                          | 6-8              |
| 12   | Methods: Methods assessing for risk of bias                                                                | 8                |
| 13   | Methods: Principal summary outcome measures                                                                | 6-7              |
| 14   | Methods: Synthesis of results, pooling methods                                                             | 6-7              |
| 15   | Methods: any assessment of risk for bias (publication bias)                                                | 8                |
| 16   | Methods: Any subgroup or sensitivity analysis                                                              | na               |
| 17   | Results: Number studies screened flow diagram                                                              | Figure 2         |
| 18   | Results: Study characteristics (study size, follow-up)                                                     | Tables 1-3       |
| 19   | Results: Data on risk for bias (see #12)                                                                   | 11-15            |
| 20   | Results: Outcomes for each study                                                                           | Tables 1-3       |
| 21   | Results: synthesis of results, data on each meta-analysis, pooled data                                     | not pooled       |
| 22   | Results: results of risk of bias across studies (see #15)                                                  | na               |
| 23   | Results: present additional analysis data (see #16)                                                        | Table 4          |
| 24   | Discussion: Summary of main findings                                                                       | 18-20            |
| 25   | Discussion: Limitations                                                                                    | 22               |
| 26   | Discussion: Conclusions                                                                                    | 22               |
| 27   | Funding: describe funding sources                                                                          | 23               |

# BMJ Open

## A systematic review for evidence-based studies of probiotics supporting a claim for microbial dysbiosis.

|                                 |                                                                                                                                                                                                                                               |
|---------------------------------|-----------------------------------------------------------------------------------------------------------------------------------------------------------------------------------------------------------------------------------------------|
| Journal:                        | <i>BMJ Open</i>                                                                                                                                                                                                                               |
| Manuscript ID:                  | bmjopen-2014-005047.R1                                                                                                                                                                                                                        |
| Article Type:                   | Research                                                                                                                                                                                                                                      |
| Date Submitted by the Author:   | 03-Jun-2014                                                                                                                                                                                                                                   |
| Complete List of Authors:       | McFarland, Lynne; Puget Sound VA, Health Services RandD                                                                                                                                                                                       |
| <b>Primary Subject Heading</b>: | Research methods                                                                                                                                                                                                                              |
| Secondary Subject Heading:      | Evidence based practice, Gastroenterology and hepatology, Infectious diseases, Nutrition and metabolism, Paediatrics                                                                                                                          |
| Keywords:                       | Microbiology < BASIC SCIENCES, CLINICAL PHARMACOLOGY, Adult gastroenterology < GASTROENTEROLOGY, Functional bowel disorders < GASTROENTEROLOGY, Gastrointestinal infections < GASTROENTEROLOGY, Inflammatory bowel disease < GASTROENTEROLOGY |
|                                 |                                                                                                                                                                                                                                               |

SCHOLARONE™  
Manuscripts

For peer review only

1  
2  
3  
4  
5  
6  
7  
8  
9  
10  
11  
12  
13  
14  
15  
16  
17  
18  
19  
20  
21  
22  
23  
24  
25  
26  
27  
28  
29  
30  
31  
32  
33  
34  
35  
36  
37  
38  
39  
40  
41  
42  
43  
44  
45  
46  
47  
48  
49  
50  
51  
52  
53  
54  
55  
56  
57  
58  
59  
60

## A systematic review for evidence-based studies of probiotics supporting a claim for microbial dysbiosis.

Lynne V. McFarland, PhD, MS

Affiliate Associate Professor, Department of Medicinal Chemistry, School of Pharmacy,  
University of Washington, Seattle, Washington

**Corresponding author:** Lynne V. McFarland, PhD, MS

**Address:** Metropolitan Park West, 1100 Olive Way, Suite #1400, Seattle,  
WA 98101

**Telephone:** 206-277-1780

**Fax:** 206-764-2935

**E-mail address:** [LVMCFARL@u.washington.edu](mailto:LVMCFARL@u.washington.edu)

**Disclaimer:** *The findings and conclusions in this study are those of the author and do not represent the official position of the University.*

The corresponding author has the right to grant on behalf of all authors and does grant on behalf of all authors, a worldwide licence to the Publishers and its licensees in perpetuity, in all forms, formats and media (whether known now or created in the future), to i) publish, reproduce, distribute, display and store the Contribution, ii) translate the Contribution into other languages, create adaptations, reprints, include within collections and create summaries, extract and/or, abstract of the Contribution, iii) create any other derivative work(s) based on the Contribution, iv) to exploit all subsidiary rights in the Contribution, v) the inclusion of electronic links from the Contribution to third party material wherever it may be located; and vi) licence any third part to do any or all of the above.

**Word Count** 6719

**Figures:** 2

**Tables:** 4

## ABSTRACT

**Objective:** To assess the evidence for the claim probiotics can correct dysbiosis of the normal microbiota resulting from disease or disruptive events.

**Setting:** Systematic review of published clinical trials of patients receiving a probiotic intervention for the prevention or treatment of various diseases.

**Data sources:** Sources searched (1985-2013): PubMed, EMBASE, Cochrane Database of Systematic Reviews, CINAHL, AMED, and ISI Web of Science. Three on-line clinical trial registries were searched: Cochrane Central Register of Controlled trials, MetaRegister of Controlled Trials, and National Institutes of Health.

**Review methods:** Included studies were randomized clinical trials of probiotic interventions having microbiologic assays. Studies were evaluated following PRISMA guidelines for specific probiotic strains. A standard data extraction form was used to collect the raw data.

**Outcome measures:** The primary outcome is the degree of microbiota correction by specific probiotic strains. Secondary outcome was the association between the degree of dysbiosis correction and clinical efficacy.

**Results:** The review of the literature found three distinct study designs: Model A (restoration) assayed patients enrolled with a healthy, undisturbed microbiota and then assayed post-disruptive event and probiotic therapy; Model B (alteration) assayed patients with pre-existing disrupted microbiota and then post-probiotic therapy; Model C (no dysbiosis) assayed volunteers with no disruptive event pre and post-probiotic. From a total of 63 trials, 83% of the probiotic products using Model A restored the microbiota, 56% using Model B improved the microbiota and only 21% using Model C had any effect on microbiota. Clinical efficacy was more commonly associated with strains capable of restoration of the normal microbiota.

**Conclusions:** The ability to assess the degree of dysbiosis improvement is dependent upon the enrolled population and the timing of microbiologic assays. The functional claim for correcting dysbiosis is poorly supported for most probiotic strains and requires further research.

**Systematic review registration:** PROSPERO (CRD42014007224)

## Strengths and Limitations

### Strengths include:

- A comprehensive review of the published literature from 1985-2013
- Literature search unrestricted by language or country
- Analysis of study designs resulted in novel strategy to limit bias and classify outcomes
- Three types of outcomes of dysbiosis applied to evidence-based studies of specific probiotic strains
- Author has over 40 years of research experience in the probiotic field

### Limitations include:

- Pooled clinical trials using different study populations
- Pooled probiotic doses and regimens
- Indirect evidence linking probiotic strains and dysbiosis
- Review done by sole author

## INTRODUCTION

The popularity of probiotics has expanded exponentially recently, but along with their increased use, debate rages on how probiotics should be regulated and whether probiotics should be considered as a medical food, drug or a food supplement. In the U.S., probiotics are typically available as dietary supplements and thus are limited to 'structure or function' health claims and, unlike prescription drugs, are not permitted to claim to 'treat' or 'cure' disease. In Europe and the United Kingdom, probiotics are allowed to have health or function claims. These claims are required to be supported by well-conducted human trials in the targeted population or in healthy volunteers, but the European Food Safety Authority (EFSA) has rejected >80% of claims submitted to them.<sup>1-3</sup> In many cases, scientific substantiation of a specific health claim was judged insufficient or based on an indirect effect.<sup>4</sup> One such functional claim made for probiotic products is they correct dysbiosis (or the disruption of bacterial and fungal species after antibiotics or other disruptive exposures) and thus may be beneficial to maintain health. Probiotics are active during this susceptible window from the time of the disruptive event to the time when normal microbiota is restored. A wide variety of mechanisms-of-action have been documented for probiotics (ranging from blocking pathogen attachment sites, destruction of the pathogen by bacteriocins or proteases that degrade toxins, to regulation of the immune system),<sup>5,6</sup> and while clinical evidence supports efficacy of some probiotic strains, the evidence linking these mechanisms-of-action to a specific health or function claims is not as clear.

A classic example of the consequence of dysbiosis is antibiotic-associated diarrhea (AAD).<sup>7,8</sup> While antibiotics may be effective in the elimination of pathogenic organisms, a common, unintended effect is the killing or inhibition of beneficial microbes due to shared susceptibility to the antibiotic. One of the many functions for normal microbiota is the ability to resist infection by pathogenic organisms, termed 'colonization resistance'.<sup>9,10</sup> The loss of a sub-population of the normal microbiota, for example, can lead to the loss of the ability to break down fibers and starches into absorbable short chain fatty acids, resulting in high level of undigested carbohydrates, which can trigger diarrhea.<sup>11</sup> Disruption of the normal microbiota has been shown to lead to higher rates of infections in other body systems other than the intestinal tract including the skin,<sup>12,13</sup> vagina,<sup>14,15</sup> respiratory tract,<sup>16,17</sup> and in the buccal cavity.<sup>18-20</sup>

1  
2  
3  
4  
5  
6 The major challenge to establishing a cause and effect for the improvement of dysbiosis by  
7 probiotics is a lack of a standard definition of 'normal' microbiota. There is substantial inter-  
8 individual variation of the species of microbes present at different body niches, which also varies  
9 by age, geographic area and health status of the host. In addition, a complete accounting of the  
10 microbiota is currently impossible, as there are no assays to detect all of  $>10^{13}$ - $10^{14}$  organisms in  
11 the intestines and standard microbial culturing methods miss 75-95% of these organisms.<sup>21,22</sup>  
12 The development of metagenomics (cataloguing individual and disease-specific bacterial gene  
13 profiles) and the creation of the international Human Microbiome Project ushered in a new era  
14 for our understanding of the complexity of these interactions within the body.<sup>23,24</sup> This paradigm  
15 shift from culturing to metagenomic analysis has expanded our ability to document shifts in  
16 microbial populations to an unparalleled degree, but the interpretation of these shifts continues to  
17 be under debate.<sup>25-28</sup> With the advent of these newer metagenomic tools, the role of probiotics in  
18 the restoration of normal microbiota is being re-visited.<sup>29</sup>  
19  
20  
21  
22  
23  
24  
25  
26  
27  
28  
29  
30  
31

32 In light of new guidance documents and recommendations, the goal of this systematic review is  
33 to determine how claims for the restoration of the normal microbiota and the correction of  
34 dysbiosis have been studied using well-designed trials and which probiotic strains have  
35 evidence-based data to support these claims.  
36  
37  
38  
39  
40  
41

## 42 **METHODS**

### 43 **Study Objective**

44 To systematically review the literature to analyse the evidence for the claim probiotics can  
45 correct dysbiosis of the normal microbiota from randomised controlled trials.  
46  
47  
48  
49  
50  
51

### 52 **Search Strategy**

53 Search terms included: probiotics + health claims, restoring normal microbiota, dysbiosis,  
54 normal microbiota, pharmacokinetics, metagenomics, probiotics, dietary supplements,  
55  
56  
57  
58  
59  
60

1  
2  
3 randomized controlled trials, antibiotic associated diarrhea (AAD), *Clostridium difficile* infection  
4 (CDI), inflammatory bowel disease (IBD), irritable bowel syndrome (IBS), traveler's diarrhea  
5 (TD), eradication of *Helicobacter pylori*, bacterial vaginosis or vaginitis, treatment of acute  
6 pediatric diarrhea, and specific probiotic strains or products. Search strategies were broad-based  
7 initially, then narrowed to clinical trials with probiotics.  
8  
9

### 13 14 **Data Sources**

15  
16 PubMed (1985-2013), EMBASE (1985-2013), Cochrane Database of Systematic Reviews  
17 (1990-2013), CINAHL (1985-2013), AMED (1985-2013), and ISI Web of Science (2000-2013).  
18 Three on-line clinical trial registries were searched: Cochrane Central Register of Controlled  
19 trials (<http://www.cochrane.org>), MetaRegister of Controlled Trials (<http://www.controlled->  
20 [trials.com/mrct](http://www.controlled-trials.com/mrct)) and National Institutes of Health (<http://www.clinicaltrials.gov>).  
21  
22  
23  
24  
25  
26

### 27 **Criteria for study selection and data extraction**

28 Abstracts of all citations were reviewed and rated for inclusion for randomized controlled trials  
29 of probiotic treatments. Full articles were retrieved if normal microbiota assays were mentioned.  
30 Non-English language trials were translated and included whenever possible. Exclusion criteria  
31 included pre-clinical studies (animal models or *in vitro* assays), safety or phase 2 studies,  
32 reviews, efficacy trials with no assays for normal microbiota species, metagenomic methods  
33 only, mechanism of action of normal microbiota or probiotic, cross-sectional surveys, case  
34 reports or case series, duplicate reports, or trials of unspecified types of probiotics. All  
35 pharmacokinetic studies in humans were reviewed, as abstracts often did not include normal  
36 microbiota assay data. Data extraction and the review process followed the PRISMA statement  
37 guidelines using a 27-item checklist and flow diagram.<sup>30</sup> A standardized data extraction form  
38 was used to collect data on the probiotic (strain type, daily dose, duration), type of controls  
39 (placebo, active or no treatment), study design (status of microbiota at baseline and follow-up  
40 times), type of microbiota assay (microbial culturing, molecular biomarkers, etc.), enrolled study  
41 population (adult vs. pediatric, healthy volunteers, disease condition), type and timing of  
42 disruptive agent (antibiotics, chemotherapy, etc.), study size and attrition, outcome assessment  
43 (efficacy and/or microbiota status at end of study, adverse events) and type of health claim.  
44  
45  
46  
47  
48  
49  
50  
51  
52  
53  
54  
55  
56  
57  
58  
59  
60



## Outcomes and definitions

The primary outcome is the degree of microbiota correction or improvement by specific probiotic strain(s). The secondary outcome is the association between the degree of dysbiosis correction and the net efficacy found from randomized controlled trials of probiotic interventions. Dysbiosis is defined as an alteration or disruption of the normal microbiota (bacterial or fungal species) due to exposure of a disruptive factor (such as antibiotics, chronic disease, stress, medical procedures or medications, etc.). As there is no current standard definition of 'normal' microbiota, for this review, restoration of normal microbiota is defined as a return to the assayed microbial species or profile taken from a healthy individual (before a disruptive event has occurred). Included studies are required to have at least a pre-probiotic treatment assay and a post-probiotic treatment assay. A variety of microbial assays were available during the search period (1985-2013), including documentation of the microbiota by either microbial cultures, or metagenomic methods [16s rRNA-targeted probes using fluorescent *in situ* hybridization (FISH) or other polymerase chain reaction (PCR) technique]<sup>8,21,28,31</sup> or by indirect methods (Nugent scores).<sup>15</sup> Nugent scores (ranged 0-10) are used to diagnose bacterial vaginosis (scores  $\geq 7$ ) or normal vaginal microbiota (scores 0-3) based on the quantitated morphotypes of small gram negative rods (*G. vaginalis/Bacteroides* spp.) and curved gram negative rods (*Mobiluncus* spp.) from gram stains of vaginal discharge smears. Microbial assays of only the strain(s) contained in the probiotic product are considered as pharmacokinetic studies and were not included in the normal microbiota profiles.

**Models of dysbiosis.** To determine the impact on normal microbiota, only direct evidence of microbiota change (species, profiles, diversity indices, or diagnostic criteria) were included and indirect effects were excluded (changes in intestinal enzymes, immune system parameters or disease symptoms). The degree to which dysbiosis was improved is categorized into three levels: (1) recovery of the normal microbiota back to baseline levels; (2) alteration or improvement of the normal microbiota; and (3) no change in normal microbiota.

The literature contained three dysbiosis models: Model A (restoration of the normal microbiota), which assayed patients enrolled with a healthy, undisturbed microbiota and then assayed again after a disruptive event (such as antibiotic exposure) and probiotic therapy occurred; Model B (alteration of the microbiota) assayed patients with pre-existing disrupted microbiota (for

1  
2  
3 example, pre-existing chronic disease or active disease) and then post-probiotic therapy; Model  
4 C (no dysbiosis) assayed volunteers with no disruptive event (before or during the clinical trial)  
5 at both pre-probiotic and post-probiotic times, as shown in Figure 1. 'Recovery' of the normal  
6 microbiota is defined as a restoration of the microbiota back to a normal healthy baseline.  
7 Recovery may be complete recovery (all assayed microbial levels returned to baseline) or  
8 incomplete recovery (partial recovery of some microbial strains, but not all returned to baseline  
9 levels). In studies enrolling subjects with dysbiosis at baseline (typically due to chronic  
10 diseases), it is not possible to show a restoration to normal microbiota levels because a normal,  
11 undisturbed microbiota was not present in these types of study subjects at the time of enrollment.  
12 Therefore, the strongest claim possible for Model B designs is for an 'alteration or improvement'  
13 of the microbiota. Only data from the probiotic-exposed subjects were analysed in this paper.  
14 Data from the control groups were used to confirm dysbiosis for subjects with chronic diseases  
15 or after a disruptive exposure, such as antibiotics or chemotherapy, unaffected by probiotic  
16 exposure.<sup>32-34</sup>  
17  
18  
19  
20  
21  
22  
23  
24  
25  
26  
27  
28  
29

### 30 **Assessment of methodological strength and quality**

31 The GRADE (Grading of Recommendations, Assessment, Development and Evaluation) system  
32 for rating overall study quality will be used for each probiotic strain or type (single strains and  
33 mixtures of strains).<sup>35</sup> Recommendation for the support of the claim of each probiotic strain or  
34 mixture can be assessed by the overall strength of the evidence ["strong", many randomized  
35 controlled trials show significant recovery of the microbiota, or "moderate" only one randomized  
36 controlled trial; or "weak", only case series or reports, limited number of small trials, *etc.*].  
37  
38  
39  
40  
41  
42  
43

44 Quality of the evidence is based on study design and graded as "high quality" (well-defined  
45 study design for determining restoration with normal microbiota, Model A), or "moderate  
46 quality" (disrupted microbiota at baseline, Model B), or "low quality" (no disruptive event  
47 occurred, Model C). Measurement of publication bias was not assessed for this review, as  
48 pooled outcome estimates of efficacy were not done, as typical in meta-analysis, but all studies  
49 with assays of microbiota were included to limit bias.  
50  
51  
52  
53  
54  
55

### 56 **Net efficacy rating**

1  
2  
3 To determine if the ability to correct dysbiosis is associated with clinical efficacy, the published  
4 literature for randomized controlled trials (RCTs) or meta-analyses of probiotics for various  
5 disease indications, including antibiotic associated diarrhea (AAD),<sup>5,36,37</sup> *Clostridium difficile*  
6 infection (CDI),<sup>5,38</sup> inflammatory bowel disease (IBD),<sup>39</sup> irritable bowel syndrome (IBS),<sup>40</sup>  
7 traveler's diarrhea (TD),<sup>41</sup> eradication of *Helicobacter pylori* (Hp),<sup>36,37</sup> bacterial vaginosis (BV)  
8 or vaginitis,<sup>42</sup> and treatment of acute pediatric diarrhea was reviewed.<sup>43-45</sup> The net rank was  
9 calculated by subtracting the number of RCTs showing non-significant or equivalent efficacy  
10 from the number of RCTs having significant efficacies. The ranks were categorized as follows:  
11 ++,  $\geq 2$  net RCTs showing significant efficacy; +, net of one RCT showing significant efficacy; 0,  
12 equal number of RCTs showing significant and non-significant efficacy results and -,  $\geq 1$  net  
13 negative or non-significant RCTs. Probiotics with no RCTs were not ranked.  
14  
15  
16  
17  
18  
19  
20  
21  
22  
23  
24

## 25 RESULTS

26  
27 A review of the literature from 1985-2013 found 353 articles that dealt with probiotic treatments  
28 and their potential effect on normal microbiota.  
29  
30  
31  
32

### 33 Excluded studies

34  
35 As shown in Figure 2, a total of 272 articles were excluded for the following reasons: reviews  
36 (n=116), probiotic efficacy studies with no data on normal microbiota assays (n=54), animal  
37 models of probiotics and changes in microbiota (n=38), metagenomic or microbiota methods  
38 only (n=17), studies on normal microbiota but with no use of probiotics (n=14), *in vitro* assays of  
39 microbiota (n=10), duplicative reports (n=2) or miscellaneous (n=21), which included probiotic  
40 mechanism of action studies, safety studies, duplicative reports, cross-sectional surveys and two  
41 with poorly described probiotic interventions.<sup>46,47</sup> A total of 81 full articles were reviewed which  
42 mentioned changes in normal microbiota or indicated a health claim for probiotics and effects on  
43 normal microbiota.  
44  
45  
46  
47  
48  
49  
50  
51

52 Probiotic pharmacokinetic studies (n=18) reporting concentrations of probiotic strains before and  
53 post-treatment, but did not assaying for other species of normal microbiota were excluded.  
54

55 While several studies using this study design claim probiotics had an impact on normal  
56  
57  
58  
59  
60

1  
2  
3 microbiota, type of data generated is pharmacokinetic behavior of the probiotics themselves and  
4 not the normal microbiota. Several studies stated that the normal microbiota was altered because  
5 an increase in various bacterial species was observed after the probiotics were given, but the  
6 species assayed were those contained in the probiotic product, so an increase is not unexpected.  
7 Pharmacokinetic studies have documented that probiotic strains taken orally can survive transit  
8 through the intestinal tract with recovery rates in feces ranging from <1% to 22%.<sup>48,49</sup> These  
9 pharmacokinetic studies were excluded from this analysis, as they did not assay other types of  
10 normal microbiota not found in the probiotic product.  
11  
12  
13  
14  
15  
16  
17  
18  
19

### 20 **Included studies**

21 Of the 63 included clinical trials, five trials had multiple treatment arms, which resulted in a total  
22 of 68 treatment arms for analysis. Engelbrekton et al. tested a mixture of 5 probiotic strains in  
23 volunteers exposed to antibiotics and also tested a mixture of 4 probiotic strains in healthy  
24 volunteers with no antibiotic exposure.<sup>50</sup> Zoppi et al. had eight different treatment arms in his  
25 study, and probiotic arms were included in our analysis [*Saccharomyces boulardii* (*S. boulardii*)  
26 alone and *Lactobacillus* (*L.*) *rhamnosus* GG alone], a mixture of two probiotics (*L. acidophilus*  
27 and *Bifido. bifidum*) and a mixture of three probiotic strains (*L. acidophilus*, *L. rhamnosus* and  
28 *Bifido. bifidum*).<sup>51</sup> Orrhage et al. had two treatment arms (*Bifido. longum* alone and a mixture of  
29 *Bifido. longum* and *L. acidophilus*).<sup>52</sup> Larsen et al. tested two single probiotics (*Bifido. lactis* and  
30 *L. acidophilus*) in separate treatment arms.<sup>53</sup> Lidbeck et al. gave either enoxacin or clindamycin  
31 and randomized patients to either *L. acidophilus* or placebo.<sup>54</sup>  
32  
33  
34  
35  
36  
37  
38  
39  
40  
41  
42

43 **Normal microbiota assay methods.** Of the 69 treatment arms that did normal microbiota assays,  
44 diverse methods were used to profile the microbiota. Many studies used only standard  
45 microbiological culture assays (37, 54%), while others (28, 40%) used techniques to detect non-  
46 cultivatable bacterial strains, which included metagenomic assays (FISH, TRFLP, 16s rRNA  
47 sequencing) or other PCR techniques. Some studies (4, 6%) used an indirect measure of normal  
48 microbiota, using the Nugent score to diagnose bacterial vaginosis, which relies upon gram stain  
49 of the vaginal secretions, vaginal pH and symptoms to characterize if normal microbiota is  
50 present or absent.<sup>15</sup>  
51  
52  
53  
54  
55  
56  
57  
58  
59  
60

1  
2  
3  
4  
5  
6 **Probiotic strains.** In the 69 treatment arms, most (36, 52%) used a single strain of probiotic,  
7 while 14 (20%) tested a mix of two probiotic strains and 19 (28%) tested a mix of three or more  
8 probiotic strains. The distribution of single versus multiple strain probiotics did not significant  
9 vary by the model of study design ( $X^2_2=2.3$ ,  $P=0.32$ ). Of the 15 restorative (Model A) study  
10 arms, 47% used a single strain of probiotic and 53% used multiple strains. Of the 25 treatment  
11 arms with disrupted microbiota at baseline (Model B), 44% used a single strain and 56% used  
12 multiple strains. Of the 29 study arms with undisturbed microbiota (Model C), 62% used a  
13 single strain and 38% used multiple strains.  
14  
15  
16  
17  
18  
19  
20  
21  
22

### 23 **Normal microbiota restoration model (Model A)**

24  
25 Only 10 studies (with 15 treatment arms) using Model A to determine restoration of the  
26 microbiota were found (Table 1).<sup>32,34,50-52,54-58</sup> The type of enrolled subjects varied from healthy  
27 volunteers to children with untreated respiratory infections, to pediatric cancer patients. For  
28 subjects with acute infections or cancer, baseline assays were done prior to the disrupting agent  
29 (antibiotics or chemotherapy). The number of subjects given probiotics averaged 20/study and  
30 ranged from 5 to 83. In 93%, the disruptive factor was antibiotic exposure and in one study,  
31 chemotherapy caused the microbiota disruption. Only 8 (53%) of the study arms did an assay  
32 during a 1-8 week follow-up period after the probiotic was discontinued.  
33  
34  
35  
36  
37  
38  
39  
40  
41  
42

43 Analysis of the probiotic strain(s) separately found only two probiotic products with more than  
44 one randomized controlled trial. The probiotic mix of *L. acidophilus* and *Bifido. bifidum* showed  
45 a complete restoration in one study, but only a partial recovery in the other. (Strength: strong,  
46 Quality: high). The probiotic mix of *L. acidophilus* (2 strains) with *Bifido. bifidum* and *Bifido.*  
47 *animalis* showed complete restoration in one study, but only a partial recovery in the other.  
48 (Strength: strong, Quality: high). Five other probiotic products with only one supporting clinical  
49 trial showed microbiota restoration (*Bifido. longum*, *Clostridium butyricum*, *L. acidophilus*, mix  
50 of *L. acidophilus* with *L. paracasei* and *Bifido. lactis*, and the mix of *L. acidophilus* with *L.*  
51 *paracasei* and *Bifido. bifidum* and two strains of *Bifido. lactis*). (Strength: moderate, Quality:  
52  
53  
54  
55  
56  
57  
58  
59  
60

1  
2  
3 high). Three probiotic products with one supporting clinical trial showed partial restoration (*S.*  
4 *boulevardii*, *L. rhamnosus* GG, mix of *L. rhamnosus* with *L. bifidus* and *L. acidophilus*), (Strength:  
5 moderate, Quality: high). Only two probiotic products using Model A showed no change in the  
6 microbiota (*Bifido. breve* and a mix of *L. acidophilus* and *Bifido. longum*). (Strength: moderate,  
7 Quality: high). In summary, 10 of 12 (83%) of the probiotic products showed complete or partial  
8 restoration of the normal microbiota.  
9  
10  
11  
12  
13  
14  
15  
16  
17

18 Of the 11 probiotic products with claims of 'restores or improves normal microbiota', 10 (91%)  
19 were supported by this review, but only seven showed complete restoration and five had partial  
20 restoration of the microbiota (Table 1). The mixture of *L. acidophilus* and *Bifido. longum* did  
21 not show any changes in the microbiota. Wada et al. claimed *Bifido. breve* 'enhanced intestinal  
22 anaerobes', but this was only compared to the placebo group.<sup>32</sup> Their data showed chemotherapy  
23 is a disruptive event, resulting in more Enterobacteria in the intestine in the placebo group, but  
24 there were no significant differences seen by the end of the 8 week follow-up in either the  
25 probiotic or the placebo group compared to baseline microbiota levels.  
26  
27  
28  
29  
30  
31  
32  
33  
34

### 35 **Disrupted normal microbiota at baseline studies (Model B)**

36  
37  
38 Twenty-four studies (with 25 treatment arms) used Model B that enrolled subjects with a pre-  
39 existing disrupted microbiota related to ongoing disease or conditions (Table 2).<sup>33,53,59-80</sup> The  
40 number of subjects given probiotics averaged  $23 \pm 16$ /study and ranged from 7-83 participants.  
41 The types of pre-existing factors that disrupted the microbiota included atopic dermatitis  
42 patients, allergies, cirrhosis, bacterial vaginosis, irritable bowel syndrome, inflammatory bowel  
43 disease (ulcerative colitis and pouchitis), idiopathic diarrhea, enteral feeding, short-bowel  
44 syndrome and colon cancer. Only 10 (40%) of the study arms did an assay during the post-  
45 probiotic follow-up period.  
46  
47  
48  
49  
50  
51  
52  
53  
54

55 Three of the probiotics had multiple clinical trials to support the claim of an improvement in the  
56 microbiota due to the probiotic. *S. boulevardii* was used in two trials either with enteral fed  
57  
58  
59  
60

1  
2  
3 patients or patients with active diarrhea and found an improvement in the habitual microbiota in  
4 the patients with active diarrhea<sup>66</sup>, but only showed indirect evidence of short-chain fatty acid  
5 changes in the other study.<sup>65</sup> (Strength: strong, Quality: moderate) A mix of four probiotic  
6 strains (2 strains of *L. rhamnosus*, *P. freudenreichii* + *Bifido. breve*) showed improved  
7 microbiota in two clinical trials.<sup>74,75</sup> (Strength: strong, Quality: moderate) Of four clinical trials  
8 testing a mixture of seven probiotic strains, two showed no significant change in microbiota<sup>77,78</sup>,  
9 one showed more anaerobes post-probiotic treatment<sup>79</sup> and one found a reduction in *Bacteroides*  
10 species.<sup>80</sup> (Strength: strong, Quality: moderate) Three clinical trials determined there were no  
11 significant changes due to *L. plantarum* 299v.<sup>62-64</sup> (Strength: strong, Quality: moderate). Of those  
12 probiotics with only one supporting clinical trial (Strength: moderate, Quality: moderate), two  
13 single probiotic strains (*E. coli* Nissle and *L. casei rhamnosus*) and five different mixtures of  
14 probiotic strains support the claim that the probiotic alters the microbiota (Table 2). In summary,  
15 10 of 18 (56%) probiotic products altered or improved microbiota in individuals with pre-  
16 existing disease.  
17  
18  
19  
20  
21  
22  
23  
24  
25  
26  
27  
28  
29  
30  
31

32 Of the 25 treatment arms, the paper's claim was confirmed in 14 (56%) of the studies. There was  
33 no significant change in the microbiota due to the probiotic in nine treatment arms and only an  
34 alteration of the microbiota in five others (Table 2). Our review disagreed with the claimed  
35 outcomes in 11 (46%) of the other treatment arms. In seven treatment arms, it was claimed the  
36 tested probiotic 'restored normal microbiota', but it is uncertain how this conclusion was reached,  
37 since there was no time when a normal undisrupted microbiota was present. Of the seven studies  
38 that claimed their probiotic 'restored' normal microbiota, our analysis determined none were  
39 capable of documenting restoration, but it is confirmed probiotics improved or altered the  
40 microbiota in these studies. Four studies claimed the probiotic 'altered or improved' normal  
41 microbiota, but this review found no significant differences when post-probiotic and baseline  
42 assays were compared for the probiotic groups. Girard-Pipau et al. concluded that *S. boulardii*  
43 'altered normal flora' because more gram positive anaerobes were seen in the probiotic group  
44 compared to the controls and an increase in three short-chain fatty acids were observed in the *S.*  
45 *boulardii* group.<sup>65</sup> However, when the analysis is restricted to trends observed in the probiotic  
46 group only, no significant differences were observed in pre-probiotic versus post-probiotic  
47  
48  
49  
50  
51  
52  
53  
54  
55  
56  
57  
58  
59  
60

1  
2  
3 microbiota profiles. Venturi et al. concluded that the mix of seven probiotic strains enhanced the  
4 concentration of some beneficial strains in the intestines.<sup>77</sup> However, the only strains having a  
5 significant increase were those contained in the probiotic mix, and not specifically normal  
6 microbiota of the host. As this study did not have an undisturbed microbiota baseline, the  
7 increased numbers of Lactobacilli and Bifidobacteria may not have reflected their normal levels.  
8 Van der Aa et al. claimed that *Bifido. breve* 'successfully modulates the intestinal flora', but no  
9 significant changes were observed in the probiotic group when comparing the baseline to the  
10 post-probiotic levels.<sup>59</sup> Odamaki et al. did show an increase in *Faecalibacterium* ssp. and  
11 *Bacteroides fragilis* ssp. at the end of *Bifido. longum* BB536 treatment, but the same increase  
12 was also observed in the placebo group.<sup>33</sup>  
13  
14  
15  
16  
17  
18  
19  
20  
21  
22  
23  
24

### 25 **Undisrupted normal microbiota studies (Model C)**

26  
27 Twenty nine trials enrolled healthy adults who had no disruptive factor present during the study  
28 (either no antibiotic or no medication exposure or presence of acute or chronic disease) that  
29 might impact normal microbiota, as shown in Table 3.<sup>14,49,50,81-106</sup> The average number of  
30 subjects given probiotics was 23/study and ranged from 7 to 160/study. Of the 29 study arms,  
31 assays were taken during a follow-up period in only 52%. Fujiwara et al. cultured seven healthy  
32 volunteers and found Enterobacteriaceae and Clostridial species post-*Bifido. longum* was  
33 reduced by 10<sup>1</sup>/g compared to baseline (P<0.03), but no other changes in the microbiota were  
34 detected.<sup>84</sup> Karlsson et al. found a significant increase in intestinal diversity in nine male  
35 volunteers with atherosclerosis given *L. plantarum* 299v, but because terminal restriction  
36 fragment length polymorphism assays were used instead of cultures for bacterial species, the  
37 specific changes in the microbiota species could not be determined.<sup>94</sup> Yang and Sheu cultured 63  
38 children (55% with *H. pylori*) given a yogurt with *L. acidophilus* and *Bifido. lactis* but only  
39 found a decrease in *E. coli* counts in the *H. pylori* negative children sub-group, no significant  
40 changes in normal microbiota was found in the *H. pylori* positive children.<sup>100</sup> Kubota et al.  
41 assayed 29 subjects with Japanese cedar pollen allergy and found milk fermented with *L.*  
42 *rhamnosus* GG and *L. gasseri* TMC0356 suppressed microbiota changes (less intestinal profile  
43 changes), but could not determine specific bacterial species changes due to the type of assay used  
44  
45  
46  
47  
48  
49  
50  
51  
52  
53  
54  
55  
56  
57  
58  
59  
60



1  
2  
3 (FISH and TRFLP).<sup>103</sup> In summary, only 4 of 19 (21%) probiotic products altered microbiota in  
4 healthy individuals who had no disruptive event.  
5  
6  
7  
8  
9

10 Of the seven studies that claimed their probiotic(s) 'restored or altered' the normal microbiota,  
11 only four claims were confirmed. Sierra et al. claimed *L. salivarius* given to 20 healthy adults  
12 'improved gut microbiota', but only increased levels of Lactobacilli were found and no other  
13 changes in normal microbiota species were detected. The only other evidence was indirect from  
14 changes observed in immune parameters.<sup>96</sup> He et al. claimed a mixture of *Bifido. longum* and  
15 *Bifido. animalis* 'modified' microbiota, but changes were seen only during the yogurt  
16 administration and not after the one week follow-up period.<sup>99</sup> Vitali et al. claimed that the  
17 mixture of four Lactobacilli strains and three Bifidobacteria strains 'modulated vaginal  
18 microbiota', but the only significant changes were due to an increase in the bacterial species  
19 contained in the probiotic mixture.<sup>14</sup>  
20  
21  
22  
23  
24  
25  
26  
27  
28  
29  
30

31 Of the probiotics supported by multiple clinical trials (*Bifido. animalis*, *Bifido. longum*, *L. casei*,  
32 *L. plantarum* 299v, the mixture of *Bifido. animalis* and *Bifido. lactis*), 13 of the trials (87%)  
33 support there is no significant change in normal microbiota if the microbiota is not disrupted.  
34 [Strength: strong, Quality: low]  
35  
36  
37  
38  
39  
40  
41

#### 42 **Association of clinical efficacy and normal microbiota restoration**

43  
44 Few studies concurrently compared clinical efficacy and the ability to restore or improve normal  
45 microbiota after dysbiosis. A synthesis of the literature of RCT for eight common disease  
46 indications was performed and the overall net strength was ranked. Probiotics with the ability to  
47 restore normal microbiota were frequently supported by RCTs for efficacy, as shown in Table 4.  
48 Of the 10 probiotics with evidence for restoration, 7 (70%) also had at least one RCT testing for  
49 at least one of the eight diseases, while 30% did not have any supportive RCTs for efficacy. Of  
50 the 7 probiotics with associated RCTs, only two probiotics (*S. boulardii* and *L. acidophilus*) have  
51 strong evidence for efficacy across most of the disease indications, while five probiotics with the  
52  
53  
54  
55  
56  
57  
58  
59  
60

1  
2  
3 ability to restore the microbiota had weak or no evidence of efficacy. For example, *S. boulardii*,  
4 which has studies supporting restoration, has strong evidence for clinical efficacy for AAD  
5 (ranked ++: 11 RCTs had significant results and 6 had non-significant results), CDI (ranked ++:  
6 had two RCTs with significant results), IBD (ranked ++: had two RCTs with significant results),  
7 IBS (ranked 0: had one RCT with significant efficacy and one RCT with non-significant results),  
8 TD (ranked +: 3 RCTs with significant efficacy and 2 with non-significant efficacy), *H. pylori*  
9 eradication (ranked -: 2 RCTs with significant results and 4 with non-significant results) and no  
10 studies for BV. *L. acidophilus*, which partially restored the microbiota in a study, is associated  
11 with clinical efficacy for AAD, IBS and BV, but not for TD or eradication of *H. pylori* and  
12 treatment of acute pediatric diarrhea (ranked ++: had 19 RCTs with significant protection and  
13 five with non-significant results). In contrast, *L. rhamnosus GG*, another probiotic capable of  
14 restoring microbiota, is often cited in meta-analysis as having significant efficacy for AAD. Our  
15 results of an updated review of the literature indicate a net weak evidence rating for clinical  
16 efficacy across all disease indications: AAD (ranked -: 3 RCTs had significant results and 6 had  
17 non-significant results), CDI (ranked -: two RCTs with non-significant results), IBD (ranked -:  
18 one RCT with non-significant results), IBS (ranked 0: 2 RCTs with significant efficacy and two  
19 RCTs with non-significant results), TD (ranked 0: one RCT with significant efficacy and one  
20 with non-significant efficacy), *H. pylori* eradication (ranked -: 3 RCTs with non-significant  
21 results), no RCTs for BV and treatment of acute pediatric diarrhea (ranked ++: 10 RCTs with  
22 significant efficacy and one with non-significant findings).  
23  
24  
25  
26  
27  
28  
29  
30  
31  
32  
33  
34  
35  
36  
37  
38  
39  
40  
41

42 Efficacy trials were not done as frequently for probiotics shown to only have the ability to alter  
43 or improve, but not restore, the microbiota after dysbiosis. Of nine probiotics that can alter the  
44 microbiota, 6 (67%) have supporting RCTs for at least one disease, but the diversity of  
45 investigated diseases was more limited. *L. casei* had moderate net strength for AAD and  
46 bacterial vaginosis, but was neutral for the ability to eradicate *H. pylori* and other disease  
47 indications were not tested in RCTs with *L. casei*. The probiotic mixture of *L. reuteri* and *L.*  
48 *fermentum* has strong evidence for bacterial vaginosis, but not for any other disease indications  
49 listed in Table 4.  
50  
51  
52  
53  
54  
55  
56  
57  
58  
59  
60

1  
2  
3 Of the eight probiotics not capable of altering or restoring normal microbiota, only *L. plantarum*  
4 299v had RCTs for AAD and IBS, both with net negative or weak strength of clinical efficacy.  
5  
6 *Bifido. lactis* and the mixture of *L. rhamnosus* and *L. reuteri* had net neutral rankings for efficacy  
7 for the treatment of acute pediatric diarrhea. The other four probiotic products with no effect on  
8 normal microbiota lacked any RCTs for clinical efficacy. Studies with *B. clausii* did not assay  
9 for normal microbiota and had non-significant trial results for *H. pylori* eradication and the  
10 treatment of pediatric diarrhea.  
11  
12  
13  
14  
15  
16

17  
18 Of the six probiotics with only pharmacokinetic data on the probiotic itself and no other  
19 investigation of other normal microbiota strains, five had RCTs showing varying net efficacies  
20 for different disease indications, as shown in Table 4.  
21  
22  
23

24  
25 Six popular probiotics (*Bacillus clausii*, *Bifido. infantis*, *L. reuteri*, *L. acidophilus* + *L. helveticus*,  
26 *L. acidophilus* + *L. casei* and *L. acidophilus* + *Bifido. animalis*) have only clinical efficacy  
27 RCTs, but have not published studies investigating their role in restoring or improving the  
28 normal microbiota.  
29  
30  
31  
32  
33

## 34 Discussion

35  
36 Developing and evaluating health or function claims for probiotics is an important issue and is  
37 now identified as a priority for research by several international organizations, including the  
38 World Gastroenterology Organization<sup>107</sup> and the American Society for Nutrition.<sup>2</sup> The U.S. Food  
39 and Drug Administration has struggled with appropriate evidence-based health claims for  
40 probiotic products and currently recommends the use of structure/function claims, such as  
41 "maintains bowel regularity", but the claim for restoring normal microbiota is still under  
42 debate.<sup>108</sup> The European Food Safety Authority (EFSA) provides guidance materials that  
43 recommend health or function claims for probiotics should have beneficial physiological effects  
44 and have appropriate scientific trials to substantiate the health claims.<sup>3</sup> Acceptable claims for  
45 intestinal health may include functional claims (improved transit time, softer stool consistency,  
46 reduction in gastrointestinal discomfort, defense against pathogens). As it is currently not  
47 possible to define a standard normal microbiota profile, the EFSA recommends functional claims  
48  
49  
50  
51  
52  
53  
54  
55  
56  
57  
58  
59  
60

1  
2  
3 for the restoration of normal microbiota should document a recovery of healthy microbiota and  
4 be accompanied by a beneficial physiological or clinical outcome.<sup>3</sup> In addition, because the  
5 efficacy and mechanisms are strain-specific and may vary by probiotic strain, the evidence must  
6  
7 be analyzed for each probiotic product individually.<sup>5,6,9,109, 110-112</sup>  
8  
9

10  
11  
12 An underappreciated finding was the influence that study design and study populations have on  
13 the interpretation of study outcomes. In the literature, five different types of study designs are  
14 commonly found relating to probiotics. The most common study type is a randomized controlled  
15 trial testing the efficacy and safety outcomes in patients, but these trials did not typically  
16 document the impact of the probiotic on the normal microbiota. The second most common type  
17 of study design is pharmacokinetic studies (documenting recovery of oral dose of probiotic or  
18 increase in probiotic strains post-treatment compared to pre-treatment or clearance of the  
19 probiotic). Even though these kinetic studies did not assay for non-probiotic strains, some  
20 extrapolated their results and concluded some effect or improvement of the normal microbiota  
21 was observed by their probiotic.<sup>19,111</sup> These two first types of study designs do not support  
22 evidence-based conclusions for the restoration or alteration of the normal microbiota and were  
23 excluded from this review.  
24  
25  
26  
27  
28  
29  
30  
31  
32  
33

34 Three types of study designs are appropriate for the study of dysbiosis. The first type of study  
35 design had normal microbiota assayed at least twice (at baseline, which was before exposure to a  
36 disruptive event or probiotics and then again during or post-probiotic treatment) to show actual  
37 recovery of assayed normal microbiota back to healthy baseline levels. The second type of study  
38 design started with inappropriate baselines (baseline samples taken after normal microbiota had  
39 been disrupted by chronic disease). For patients with established chronic diseases, there is no  
40 “normal microbiota” baseline in either the probiotic or the control group. Even if baselines are  
41 taken during remission, the microbiota may still be impacted by chronic disease or acute  
42 diarrhea. Studies of probiotics in chronic diseases or acute disease typically report on ‘pre-  
43 probiotic treatment’ and ‘post-probiotic treatment’ and may show significant shifts in microbial  
44 species, but it is uncertain if this reflects a true re-establishment of normal microbiota profiles.  
45  
46 The third type of study design enrolled healthy volunteers, who were not challenged with  
47 antibiotics (so no normal microbiota disruption occurred), and show only the effect of probiotics  
48 on a healthy microbiota (typically mild or no effects). Control groups were not required for our  
49  
50  
51  
52  
53  
54  
55  
56  
57  
58  
59  
60

1  
2  
3 assessment of the impact of probiotics on microbiota, but control groups can document the  
4 degree normal microbiota is disrupted by inciting agents (antibiotic, disease onset, etc.).  
5  
6  
7  
8  
9

10 Five single strain probiotics (*Bifido. longum*, *Clost. butyricum*, *L. acidophilus*, *L. rhamnosus* and  
11 *S. boulardii*) and five probiotic mixtures [(*L. acidophilus* + *Bifido. bifidum*), (*L. rhamnosus* + *L.*  
12 *bifidus* + *L. acidophilus*), (*L. acidophilus* + *L. paracasei* + *Bifido. lactis*), (*L. acidophilus*, 2  
13 strains, *Bifido. bifidum*, *Bifido. animalis*) and (*L. acidophilus* + *L. paracasei* + *Bifido. bifidum*  
14 + 2 strains of *Bifido. lactis*)] documented either complete or partial recovery of normal  
15 microbiota (Model A). Only two probiotic mixtures [(2 strain mixture: *L. acidophilus* + *Bifido.*  
16 *bifidum*) and (4 strain mixture: *L. acidophilus*, 2 strains, *Bifido. bifidum*, *Bifido. animalis*)] were  
17 supported by a confirmatory study. Evidence that probiotics may alter or improve normal  
18 microbiota (Model B) was found for three single strain probiotics (*E. coli* Nissle, *S. boulardii*  
19 and *L. casei rhamnosus*) and seven mixtures of 2-7 probiotic strains. Of these ten probiotics  
20 finding alteration of the microbiota, only three had multiple trials [*S. boulardii*, and a four strain  
21 mixture (2 strains of *L. rhamnosus* + *P. freudenreichii* + *Bifido. breve*), and a seven strain  
22 mixture (4 Lactobacilli and 3 Bifidobacteria strains)], but only one had consistent results  
23 showing improvements in the microbiota.<sup>74,75</sup> Clearly, more than one study is needed to confirm  
24 the impact of a probiotic on the normal microbiota. Of the 19 probiotic strains (or mixtures)  
25 studied in healthy volunteers who were not exposed to disruptive factors (Model C), no change  
26 in the normal microbiota was observed for 79%, indicating the robustness of the microbiota.  
27  
28  
29  
30  
31  
32  
33  
34  
35  
36  
37  
38  
39  
40  
41  
42  
43

44 Improvement in the normal microbiota by specific probiotic strains seemed to be associated with  
45 better clinical endpoints. Within eight common diseases typically treated with probiotics, more  
46 trials with significant efficacy were associated with probiotic strains shown to restore the normal  
47 microbiota, and only one trial with significant efficacy was found for probiotics that did not alter  
48 the microbiota. However, few probiotics had efficacy trials for all eight diseases and many did  
49 not have any efficacy trials.  
50  
51  
52  
53  
54  
55  
56  
57  
58  
59  
60

1  
2  
3  
4  
5  
6  
7  
8  
9  
10  
11  
12  
13  
14  
15  
16  
17  
18  
19  
20  
21  
22  
23  
24  
25  
26  
27  
28  
29  
30  
31  
32  
33  
34  
35  
36  
37  
38  
39  
40  
41  
42  
43  
44  
45  
46  
47  
48  
49  
50  
51  
52  
53  
54  
55  
56  
57  
58  
59  
60

Some probiotics which have published efficacy trials for various diseases did not have studies investigating the effect of the probiotic on normal microbiota: *Bacillus clausii*, *Bifido. infantis*, *L. brevis*, *L. reuteri*, mix of 2 strains (*L. acidophilus* + *L. helveticus*), mix of 2 strains (*L. acidophilus* + *L. casei*) or (*L. acidophilus* + *Bifido. animalis*), mix of 4 strains [*L. rhamnosus* (2 strains), *Propionibacterium freudenreichii* + *Bifido. animalis*] and mix of 7 strains (*L. sporogens*, *L. bifidum*, *L. bulgaricus*, *L. thermophilus*, *L. acidophilus*, *L. casei*, *L. rhamnosus*).

### Comparison of results with other studies

Other reviews in the literature of claims for probiotics relating to changes in the normal microbiota have focused on the broad issues of regulatory standardization of health or function claims, the use of proper study designs and the challenge of defining biomarkers for a 'healthy microbiota'.<sup>3,29,112</sup> Donovan et al. recommends that health claims for probiotics be supported by well-conducted human trials in the targeted population.<sup>2</sup> These reviews also recommend that gut biomarkers need to be correlated with clinical endpoints, however none of these reviews attempted to do so.<sup>29,112</sup> No prior review has attempted to analyze the association between probiotic strains and their impact on normal microbiota by stratifying on the quality of study design.<sup>111</sup> This review addressed these concerns by analyzing probiotic strains by the quality of the study design and only including trials that assessed the normal microbiota (either by microbial culturing or molecular strain biomarkers) and assessed the degree of dysbiosis improvement with clinical outcomes for each probiotic strain.

### Opportunities for future research

Most of the studies (80%) using Model A to document restoration of the normal microbiota only used microbiologic culturing techniques, which can only detect those organisms that grow in culture. Use of the more advanced molecular metagenomic techniques have found that culturing alone misses up to 95% of these organisms.<sup>21,22</sup> The use of the metagenomic techniques was more common in the studies using Model B (48%) and Model C (45%) study designs, which only addresses potential alteration of the microbiota. Characterization of the microbiota is a

1  
2  
3 complex issue and a comprehensive accounting of all the bacterial and fungal strains in the body  
4 is beyond our current capabilities. Therefore, any studies of changes to the microbiota are  
5 incomplete at best, but general trends in bacterial phylotypes can be documented using DNA  
6 probes and metagenomic techniques. Differential detection bias may be present due to the  
7 variety of assays used in these studies and should be accounted for in future studies.  
8  
9  
10  
11

12  
13  
14  
15  
16 Another suggestion for future studies is to include an appropriate follow-up time period post-  
17 probiotic administration. Fewer than half of the reviewed trials did assays for normal microbiota  
18 during an appropriate follow-up period. As it has been shown that recovery from a disrupting  
19 factor can be prolonged (typically eight weeks),<sup>7,8</sup> and studies that failed to find microbiota  
20 recovery might have detected a return to normal baseline levels if a sufficiently long time was  
21 given for the recovery to have occurred. Future studies should strive to allow time for the  
22 restoration of the normal microbiota to occur.  
23  
24  
25  
26  
27

28  
29  
30  
31 As the effects of probiotics are strain-specific, and many studies typically only report the genus  
32 and species of the tested probiotic, future reports should include a complete description of the  
33 probiotic to the strain level.<sup>5,112</sup>  
34  
35  
36  
37  
38

### 39 **Strengths and weaknesses**

40  
41  
42 The strengths of this review included the completeness of the search strategy, which reviewed  
43 multiple citation databases, trial registries and author searches, use of established PRISMA  
44 protocols for reviews and the use of an outcome classification scheme for different degrees of  
45 assessment for microbial recovery. This analysis controlled the confounding effects of different  
46 study populations and study designs present in the literature. Pharmacokinetic studies of just the  
47 probiotic strain(s) itself were excluded and only trials that assayed other species found in the  
48 microbiota were included. By applying a standard definition for 'restoring' versus 'improving'  
49 normal microbiota, it is possible to distinguish significant differences by the type of study  
50 designs used and differential effects of the different probiotic strains. Limitations of this review  
51  
52  
53  
54  
55  
56  
57  
58  
59  
60

1  
2  
3 include pooling trials from different populations (adult versus pediatric) and different probiotic  
4 doses and regimens used. Incomplete retrieval of all studies assessing the effect that probiotics  
5 have on human microbiota is also a potential limitation of any literature search. Another  
6 limitation is that dysbiosis improvement and clinical efficacy for probiotic strains is also  
7 indirectly associated, no direct cause and effect relationship was possible with the types of  
8 studies done. Another limitation is the current lack of a standard definition of what comprises a  
9 'normal microbiota'. The constituents of the microbiota vary by individual, by age, geographic  
10 location and health status of the host. Current microbiologic techniques are improving, but can  
11 not detect all species present in the host.  
12  
13  
14  
15  
16  
17  
18  
19  
20  
21

## 22 **Conclusion**

23 The challenges in recommending a specific probiotic to patients who need to restore or improve  
24 their normal microbiota after a disrupting event occurs is two-fold: one is the diversity of  
25 probiotic products available and second is the varying strength of evidence provided by clinical  
26 trials using different outcome measures and study designs. By grouping studies into three groups  
27 that result in three different degrees of probiotic effect (restoration, improvement or no change),  
28 an overview of the body of evidence is possible. By comparing the strength of the clinical  
29 evidence for common diseases by the degree to which the probiotics could impact the restoration  
30 of the normal microbiota, it became obvious that those probiotics with a greater ability to restore  
31 the microbiota are associated with the strongest strength of clinical efficacy. While this evidence  
32 only indirectly links clinical efficacy with the ability to restore the microbiota, the overall review  
33 of the evidence shows this is an important mechanism of action for probiotics. What becomes  
34 obvious is that more studies are required to conclude which probiotic strains have a beneficial  
35 impact on the normal microbiota, as most strains have only a single clinical trial and many  
36 probiotic products overstate the strength of their claim to restore normal microbiota. These types  
37 of issues should be considered for health care policy makers and researchers for future studies  
38 and for creating guidelines for health/function claims.  
39  
40  
41  
42  
43  
44  
45  
46  
47  
48  
49  
50  
51  
52  
53  
54  
55  
56  
57  
58  
59  
60



**Table 1. Model A:** Evidence-based data for restoration of normal microbiota (NM) for 12 probiotics from 10 studies (15 treatment arms).

| Probiotic*                                                                                                                                       | Reference                                                | No. treated with probiotic | Type of assay for NM | Enrolled population                    | Type of disrupting factor    | Follow-up post-treatment (wks) | Claims stated in papers   | Evidence-based claim       |
|--------------------------------------------------------------------------------------------------------------------------------------------------|----------------------------------------------------------|----------------------------|----------------------|----------------------------------------|------------------------------|--------------------------------|---------------------------|----------------------------|
| <i>Bifido. breve</i>                                                                                                                             | Wada 2010 <sup>32</sup>                                  | 19                         | FISH                 | pediatric cancer patients              | chemotherapy                 | 8                              | enhances anaerobes        | no change                  |
| <i>Bifido. longum</i> BB536                                                                                                                      | Orrhage 1994 <sup>52</sup>                               | 10                         | culture              | healthy volunteers                     | clindamycin                  | 0                              | restores                  | restores                   |
| <i>Clost. butyricum</i> MIYAIRI                                                                                                                  | Seki 2003 <sup>34</sup>                                  | 83                         | culture              | pediatric respiratory or GI infections | antibiotics                  | 0                              | restores                  | restores                   |
| <i>L. acidophilus</i> NCFB1748                                                                                                                   | Lidbeck 1988 <sup>54</sup>                               | 5                          | culture              | healthy volunteers                     | enoxacin or                  | 1                              | restores only in enoxacin | restores only in enoxacin, |
|                                                                                                                                                  |                                                          | 5                          | culture              | volunteers                             | clindamycin                  | 1                              | no change                 | no change in clindamycin   |
| <i>L. rhamnosus</i> GG                                                                                                                           | Zoppi 2001 <sup>51</sup>                                 | 7                          | culture              | pediatric respiratory infections       | ceftriaxone                  | 0                              | partially corrects        | partially restores         |
| <i>S. boulardii</i> lyo                                                                                                                          | Zoppi 2001 <sup>51</sup>                                 | 6                          | culture              | pediatric respiratory infections       | ceftriaxone                  | 0                              | improves                  | partially restores         |
| <i>L. acidophilus</i> + <i>Bifido. bifidum</i>                                                                                                   | Black 1991, <sup>55</sup><br>Zoppi 2001 <sup>51</sup>    | 10,                        | culture,             | healthy volunteers,                    | ampicillin,                  | 2,                             | recovers more rapidly,    | restores,                  |
|                                                                                                                                                  |                                                          | 7                          | culture              | pediatric respiratory                  | ceftriaxone                  | 0                              | less change               | partially restores         |
| <i>L. acidophilus</i> 1748 + <i>Bifido. longum</i> BB536                                                                                         | Orrhage 1994 <sup>52</sup>                               | 10                         | culture              | healthy volunteers                     | clindamycin                  | 0                              | no change                 | no change                  |
| <i>L. rhamnosus</i> + <i>L. bifidus</i> + <i>L. acidophilus</i>                                                                                  | Zoppi 2001 <sup>51</sup>                                 | 7                          | culture              | pediatric respiratory infections       | ceftriaxone                  | 0                              | partially corrects        | partially restores         |
| <i>L. acidophilus</i> 1748 + <i>L. paracasei</i> F19 + <i>Bifido lactis</i> Bb12                                                                 | Jernberg 2005 <sup>56</sup>                              | 4                          | culture PCR TRFLP    | healthy volunteers                     | clindamycin                  | 2                              | restores                  | restores                   |
| <i>L. acidophilus</i> CUL60+ <i>L. acidophilus</i> CUL21 + <i>Bifido. bifidum</i> CUL17 + <i>Bifido animalis lactis</i>                          | Madden 2005, <sup>57</sup><br>Plummer 2005 <sup>58</sup> | 15,                        | culture,             | <i>H. pylori</i> +,                    | amoxicillin + metronidazole, | 2,                             | restores,                 | restores,                  |
|                                                                                                                                                  |                                                          | 76                         | culture              | <i>H. pylori</i> +                     | amoxicillin + clarithromycin | 2                              | restores more rapidly     | partially restores         |
| <i>L. acidophilus</i> NCFM + <i>L. paracasei</i> Lpc-37 + <i>Bifido. bifidum</i> Bb02+ <i>Bifido. lactis</i> Bi-04 + <i>Bifido. lactis</i> Bi-07 | Engelbrektsen 2006 <sup>50</sup>                         | 20                         | culture PCR TRFLP    | healthy volunteers                     | augmentin                    | 2                              | restores                  | restores                   |

\*including strain (when reported)

**Table 2. Model B:** Evidence-based data for improvement or alteration of normal microbiota (NM) in 18 probiotics from 24 studies (25 treatment arms) with disturbed microbiota at baseline.

| Probiotic*                                                               | Reference                                                   | No. treated with probiotic | Type(s) of assay for NM   | Pre-existing disrupting factor** | Follow-up time | Claims stated in papers | Evidence-based claim | Type of change found in NM                 |
|--------------------------------------------------------------------------|-------------------------------------------------------------|----------------------------|---------------------------|----------------------------------|----------------|-------------------------|----------------------|--------------------------------------------|
| <i>Bifido. breve</i> M-16V                                               | Van der Aa 2010 <sup>59</sup>                               | 46                         | FISH                      | Atopic dermatitis                | 0              | modulates NF            | no change            | --                                         |
| <i>Bifido. lactis</i> Bi-07                                              | Larsen 2011 <sup>53</sup>                                   | 17                         | PCR                       | Atopic dermatitis                | 0              | no change               | no change            | --                                         |
| <i>Bifido. longum</i> BB536                                              | Odamaki 2007 <sup>33</sup>                                  | 22                         | TRFLP PCR                 | Cedar pollen allergy             | 4 wk           | maintains NF            | no change            | --                                         |
| <i>E. coli</i> Nissle                                                    | Lata 2007 <sup>60</sup>                                     | 22                         | culture                   | liver cirrhosis                  | 0              | restores                | improves             | more Bifido. & Lacto.                      |
| <i>L. acidophilus</i> 700396                                             | Larsen 2011 <sup>53</sup>                                   | 17                         | PCR                       | atopic dermatitis                | 0              | no change               | no change            | --                                         |
| <i>L. casei rhamnosus</i> Lcr35                                          | Petricevic 2008 <sup>61</sup>                               | 83                         | Nugent scores             | bacterial vaginosis              | 4 wk           | restores                | improves             | improved Nugent scores                     |
| <i>L. plantarum</i> 299v                                                 | Nobaek 2000, <sup>62</sup>                                  | 25,                        | culture,                  | IBS,                             | 4 wk,          | no change,              | no change,           | --                                         |
|                                                                          | Klarin 2005, <sup>63</sup>                                  | 17,                        | culture,                  | enterally-fed,                   | 0,             | no change,              | no change,           |                                            |
|                                                                          | Klarin 2008 <sup>64</sup>                                   | 22                         | culture                   | antibiotics                      | 0              | no change,              | no change,           |                                            |
| <i>S. boulardii</i> Iyo                                                  | Girard 2002, <sup>65</sup><br>Swidsinski 2008 <sup>66</sup> | 10,                        | culture,                  | enterally-fed,                   | 9 d,           | alters NF,              | no change,           | --                                         |
|                                                                          |                                                             | 20                         | FISH                      | active diarrhea                  | 3 wk           | improves                | improves             | more 'habitual microbiota'                 |
| <i>L. rhamnosus</i> GR-1 + <i>L. fermentum</i> RC14                      | Reid 2001 <sup>67</sup>                                     | 33                         | Nugent scores             | bacterial vaginosis              | 2 wk           | restores                | improves             | improved Nugent scores                     |
| <i>L. rhamnosus</i> GR-1 + <i>L. fermentum</i> RC14                      | Reid 2003 <sup>68</sup>                                     | 31                         | Nugent scores and culture | bacterial vaginosis              | 30 d           | restores                | improves             | improved Nugent scores                     |
| <i>L. plantarum</i> 8PA3 + <i>Bifido bifidum</i>                         | Kirpich 2008 <sup>69</sup>                                  | 32                         | culture                   | colon cancer                     | 0              | restores                | improves             | more <i>E. coli</i> and <i>Enterococci</i> |
| <i>L. rhamnosus</i> GR1 + <i>L. reuteri</i> RC14                         | Hummelen 2010 <sup>70</sup>                                 | 23                         | Nugent score              | bacterial vaginosis              | 0              | no change               | no change            | --                                         |
| <i>L. casei</i> Shirota+ <i>Bifido breve</i> BBG01                       | Uchida 2007 <sup>71</sup>                                   | 4                          | culture                   | short bowel syndrome             | 0              | no change               | no change            | --                                         |
| <i>L. brevis</i> CD2 + <i>L. salivaris</i> FV2 + <i>L. plantarum</i> FV9 | Mastromarino 2009 <sup>72</sup>                             | 19                         | Nugent score              | bacterial vaginosis              | 2 wk           | restores                | improves             | improved Nugent scores                     |

|                                                                                                                                                                                    |                              |     |               |                     |       |                  |            |                                     |
|------------------------------------------------------------------------------------------------------------------------------------------------------------------------------------|------------------------------|-----|---------------|---------------------|-------|------------------|------------|-------------------------------------|
| <i>L. paracasei</i> Lpc37 + <i>L. acidophilus</i> 74-2 + <i>Bifido. animalis</i> DGCC420                                                                                           | Roessler 2012 <sup>73</sup>  | 30  | PCR           | atopic dermatitis   | 0     | no change        | no change  | --                                  |
| <i>L. rhamnosus</i> GG + <i>L. rhamnosus</i> Lc705 + <i>P. freudenreichii shermanii</i> JS + <i>Bifido. breve</i> Bb99                                                             | Kajander 2005, <sup>74</sup> | 41, | PCR,          | IBS,                | 0,    | restores,        | improves,  | Improved similarity index           |
|                                                                                                                                                                                    | Lyra 2010 <sup>75</sup>      | 22  | PCR           | IBS                 | 0     | alters           | alters     | More Clostridia and Rumino-coccus   |
| <i>L. acidophilus</i> 4356 + <i>L. plantarum</i> 14917 + <i>L. rhamnosus</i> 7469 + <i>Bifido. bifidum</i> 2952                                                                    | Wong 2013 <sup>76</sup>      | 7   | PCR           | liver disease       | 0     | improves         | alters     | Less Firmicutes, more Bacteroidetes |
| <i>L. acidophilus</i> + <i>L. paracasei</i> + <i>L. delbrueckii ssp. bulgaricus</i> + <i>L. plantarum</i> + <i>Bifido. longum</i> + <i>Bifido. infantis</i> + <i>Bifido. breve</i> | Venturi 1999, <sup>77</sup>  | 20, | culture       | ulcerative colitis, | 15 d, | enhances,        | no change, | --                                  |
|                                                                                                                                                                                    | Brigidi 2001, <sup>78</sup>  | 10, | culture & PCR | IBS,                | 10 d, | no change,       | no change, | --                                  |
|                                                                                                                                                                                    | Kuhbacher 2006 <sup>79</sup> | 10  | FISH          | pouchitis           | 0     | altered richness | altered    | More anaerobes                      |
|                                                                                                                                                                                    | Ng 2013 <sup>80</sup>        | 10  | PCR           | IBS                 | 0     | modulates        | altered    | Less Bacteroides                    |

\*including strain (when reported)

\*\*disruption of normal microbiota at baseline shown by significant differences compared to control (non-diseased) population.

**Table 3. Model C:** Evidence-based data for improvement or alteration of normal microbiota (NM) in 19 probiotics in healthy volunteers enrolled in 29 studies (29 treatment arms) in studies with no disruptive exposures.

| Probiotic                                            | Reference                                                                                                                                       | No. treated with probiotic | Type of assay for NM             | Enrolled population                                        | Type of disrupting factor    | Follow-up post-treatment | Claims stated in papers                            | Evidence-based claim                               |
|------------------------------------------------------|-------------------------------------------------------------------------------------------------------------------------------------------------|----------------------------|----------------------------------|------------------------------------------------------------|------------------------------|--------------------------|----------------------------------------------------|----------------------------------------------------|
| <i>Bifido. animalis lactis</i> DN173010              | Rochet 2008, <sup>49</sup> Oswari 2013 <sup>81</sup>                                                                                            | 12, 160                    | FISH PCR                         | healthy volunteers                                         | none, none                   | 10 d, 6 mon              | no change, no change                               | no change, no change                               |
| <i>Bifido. bifidum</i>                               | Langhendries 1995 <sup>82</sup>                                                                                                                 | 20                         | culture                          | healthy volunteers                                         | none                         | 0                        | no change                                          | no change                                          |
| <i>Bifido. longum</i>                                | Benno 1992, <sup>83</sup> Fujiwara 2001, <sup>84</sup> Harmsen 2002 <sup>85</sup>                                                               | 5, 7, 14                   | culture, culture, FISH           | healthy volunteers                                         | none, none, none             | 0, 30 d, 0               | no change, alters, no change                       | no change, alters, no change                       |
| <i>L. casei</i> ND114001                             | Guerin 1998, <sup>86</sup> Rochet 2006, <sup>87</sup> Rochet 2008 <sup>88</sup>                                                                 | 12, 12, 7                  | culture, FISH, FISH              | healthy volunteers                                         | none, none, none             | 1 wk, 10 d, 0            | no change, no change, no change                    | no change, no change, no change                    |
| <i>L. johnsonii</i> La1                              | Brunser 2006 <sup>89</sup>                                                                                                                      | 32                         | culture & FISH                   | healthy volunteers                                         | none                         | 2 wk                     | no claim                                           | no change                                          |
| <i>L. plantarum</i> 299v                             | Goossens 2003, <sup>90</sup> Goossens 2005, <sup>91</sup> Goossens 2006, <sup>92</sup> Berggren 2003, <sup>93</sup> Karlsson 2010 <sup>94</sup> | 11, 32, 15, 33, 9          | culture, culture, culture, TRFLP | healthy, healthy, colonic polyps, healthy, atherosclerosis | none, none, none, none, none | 3 wk, 4 wk, 0, 0, 0      | no change, no change, no change, no change, alters | no change, no change, no change, no change, alters |
| <i>L. rhamnosus</i> GG                               | Gueimonde 2006 <sup>95</sup>                                                                                                                    | 29                         | PCR                              | healthy volunteers                                         | none                         | 0                        | no change                                          | no change                                          |
| <i>L. salivarius</i> CECT5713                        | Sierra 2010 <sup>96</sup>                                                                                                                       | 20                         | culture                          | healthy volunteers                                         | none                         | 0                        | improves                                           | no change                                          |
| <i>S. boulardii</i> Iyo                              | Vanhoutte 2006 <sup>97</sup>                                                                                                                    | 30                         | PCR                              | healthy volunteers                                         | none                         | 0                        | no change                                          | no change                                          |
| <i>Bifido. animalis</i> + <i>Bifido. longum</i>      | Zhong 2006, <sup>98</sup> He 2008 <sup>99</sup>                                                                                                 | 11, 11                     | FISH, FISH                       | healthy volunteers                                         | none                         | 7 d, 7d                  | no change, modifies                                | no change, no change                               |
| <i>L. acidophilic</i> + <i>Bifido. lactis</i>        | Yang 2012 <sup>100</sup>                                                                                                                        | 63                         | culture                          | healthy but 55% <i>H. pylori</i> +                         | none                         | 0                        | restores                                           | alters                                             |
| <i>L. rhamnosus</i> GG + <i>Bifido. longum</i> Bb536 | Mah 2007 <sup>101</sup>                                                                                                                         | 20                         | FISH                             | healthy neonates                                           | none                         | 6 mon                    | no change                                          | no change                                          |
| <i>L. rhamnosus</i> GG + <i>Bifido. lactis</i> Bb12  | Rafter 2007 <sup>102</sup>                                                                                                                      | 38                         | culture                          | colon cancer patients or at risk                           | none                         | 0                        | no change                                          | no change                                          |

|                                                                                                                                                                                                             |                                                                                                                                                                                           |                                  |    |                          |                                   |      |      |                       |           |
|-------------------------------------------------------------------------------------------------------------------------------------------------------------------------------------------------------------|-------------------------------------------------------------------------------------------------------------------------------------------------------------------------------------------|----------------------------------|----|--------------------------|-----------------------------------|------|------|-----------------------|-----------|
| 1<br>2<br>3<br>4<br>5<br>6<br>7<br>8<br>9<br>10<br>11<br>12<br>13<br>14<br>15<br>16<br>17<br>18<br>19<br>20<br>21<br>22<br>23<br>24<br>25<br>26<br>27<br>28<br>29<br>30<br>31<br>32<br>33<br>34<br>35<br>36 | <i>L. rhamnosus</i> GG + <i>L. gasseri</i> TMC0356                                                                                                                                        | Kubota 2009 <sup>103</sup>       | 14 | culture<br>FISH<br>TRFLP | healthy,<br>allergy<br>patients   | none | 0    | suppressed<br>changes | alters    |
|                                                                                                                                                                                                             | <i>L. paracasei</i> B21060 + <i>L. paracasei</i> B21070 + <i>L. gasseri</i> B21090                                                                                                        | Morelli 2003 <sup>104</sup>      | 12 | culture                  | healthy<br>volunteers             | none | 3 d  | no claims             | no change |
|                                                                                                                                                                                                             | <i>L. acidophilus</i> 1748 + <i>L. paracasei</i> F19 + <i>Bifido. lactis</i> Bb12                                                                                                         | Sullivan 2009 <sup>105</sup>     | 15 | culture                  | chronic<br>fatigue<br>patients    | none | 4 wk | no change             | no change |
|                                                                                                                                                                                                             | <i>L. rhamnosus</i> 271 + <i>L. acidophilus</i> NCFM + <i>L. paracasei</i> 114001 + <i>Bifido. animalis</i> 1017                                                                          | Engelbrektson 2006 <sup>50</sup> | 22 | culture<br>TRFLP<br>PCR  | healthy<br>volunteers             | none | 2 wk | no change             | no change |
|                                                                                                                                                                                                             | <i>Bifido. animalis</i> lactis + <i>L. delbrueckii</i> I-1632 + <i>L. delbrueckii</i> I-1519 + <i>L. lactis</i> cremoris                                                                  | McNulty 2011 <sup>106</sup>      | 7  | PCR                      | healthy<br>twins<br>volunteers    | none | 4 wk | no change             | no change |
|                                                                                                                                                                                                             | <i>L. acidophilus</i> + <i>L. paracasei</i> + <i>L. delbrueckii</i> ssp. <i>bulgaricus</i> + <i>L. plantarum</i> + <i>Bifido. longum</i> + <i>Bifido. infantis</i> + <i>Bifido. breve</i> | Vitali 2012 <sup>14</sup>        | 15 | PCR                      | healthy<br>pregnant<br>volunteers | none | 0    | modulates             | no change |

37 \*including strain (when reported)

38 Abbreviations: FISH, fluorescence *in situ* hybridization analysis; TRFLP, terminal restriction fragment  
39 length polymorphism analysis; PCR, polymerase chain reaction  
40  
41  
42  
43  
44  
45  
46  
47  
48  
49  
50  
51  
52  
53  
54  
55  
56  
57  
58  
59  
60

**Table 4.** Comparison of the ability of probiotic to restore or improve dysbiosis with ranked clinical efficacy for various disease indications.

| Probiotic*                                                                                                                                | Restored normal microbiota * | Altered normal microbiota* | Ranked net evidence for efficacy** |     |     |     |    |          |              |                |
|-------------------------------------------------------------------------------------------------------------------------------------------|------------------------------|----------------------------|------------------------------------|-----|-----|-----|----|----------|--------------|----------------|
|                                                                                                                                           |                              |                            | AAD                                | CDI | IBD | IBS | TD | H pylori | Vaginitis/BV | Acute Ped diar |
| <b>Restores microbiota</b>                                                                                                                |                              |                            |                                    |     |     |     |    |          |              |                |
| <i>Clostr. butyricum</i><br><i>MIYAIRI</i>                                                                                                | yes                          | nd                         | -                                  |     |     |     |    |          | -            |                |
| <i>L. acidophilus</i> + <i>Bifido. bifidum</i>                                                                                            | yes                          | nd                         | 0                                  | -   |     |     |    |          |              |                |
| <i>L. acidophilus</i> 1748 +<br><i>L. paracasei</i> F19 +<br><i>Bifido. lactis</i> Bb12                                                   | yes                          | nd                         |                                    |     |     | -   |    |          |              |                |
| <i>Bifido. longum</i>                                                                                                                     | yes                          | no                         |                                    |     | -   | +   |    |          |              |                |
| <i>L. acidophilus</i> +<br><i>L. acidophilus</i> +<br><i>Bifido. bifidum</i> + <i>Bifido. animalis</i>                                    | yes                          | nd                         |                                    |     |     |     |    |          |              |                |
| <i>L. acidophilus</i> +<br><i>L. paracasei</i> +<br><i>Bifido. lactis</i> (2)                                                             | yes                          | no                         |                                    |     |     |     |    |          |              |                |
| <i>S. boulardii</i> lyo                                                                                                                   | partial                      | yes                        | ++                                 | ++  | ++  | 0   | +  | -        |              | ++             |
| <i>L. rhamnosus</i> GG                                                                                                                    | partial                      | nd                         | -                                  | -   | -   | 0   | 0  | -        | 0            | ++             |
| <i>L. acidophilus</i>                                                                                                                     | partial                      | no                         | ++                                 |     |     | ++  | -  | -        | +            | 0              |
| <i>L. acidophilus</i> +<br><i>L. bifidus</i> +<br><i>L. rhamnosus</i>                                                                     | partial                      | nd                         |                                    |     |     |     |    |          |              |                |
| <b>Alters microbiota</b>                                                                                                                  |                              |                            |                                    |     |     |     |    |          |              |                |
| <i>E. coli</i> Nissle                                                                                                                     | nd                           | yes                        |                                    |     | -   |     |    |          |              | +              |
| <i>L. casei</i><br>(DN114001 or Lcr35)                                                                                                    | nd                           | yes                        | +                                  |     |     |     |    | 0        | +            | ++             |
| <i>L. rhamnosus</i> GR1 +<br><i>L. fermentum</i> RC14                                                                                     | nd                           | yes                        |                                    |     |     |     |    |          | ++           |                |
| <i>L. plantarum</i> 8PA3 +<br><i>Bifido. bifidum</i>                                                                                      | nd                           | yes                        |                                    |     |     |     |    |          |              |                |
| <i>L. rhamnosus</i> GG +<br><i>L. rhamnosus</i> Lc705 +<br><i>P. freudenreichii</i><br><i>shermanii</i> JS +<br><i>Bifido. breve</i> Bb99 | nd                           | yes                        |                                    |     |     | ++  |    |          |              |                |
| <i>L. acidophilus</i> +<br><i>L. plantarum</i> +<br><i>L. rhamnosus</i> + <i>Bifido</i><br><i>bifidum</i>                                 | nd-                          | yes                        |                                    |     |     |     |    |          |              |                |

|                                                                                                                                                                                                                                     |    |     |   |   |    |   |  |  |   |   |    |
|-------------------------------------------------------------------------------------------------------------------------------------------------------------------------------------------------------------------------------------|----|-----|---|---|----|---|--|--|---|---|----|
| <i>L. brevis</i> CD2 +<br><i>L. salivarius</i> FV2 +<br><i>L. plantarum</i> FV9                                                                                                                                                     | nd | yes |   |   |    |   |  |  |   | + |    |
| <i>L. acidophilus</i> +<br><i>L. paracasei</i> +<br><i>L. delbrueckii ssp.</i><br><i>bulgaricus</i> +<br><i>L. plantarum</i> , <i>Bifido.</i><br><i>longum</i> , <i>Bifido.</i><br><i>infantis</i> , <i>Bifido.</i><br><i>breve</i> | nd | yes | - |   | ++ | + |  |  |   |   | ++ |
| <b>No effect on microbiota</b>                                                                                                                                                                                                      |    |     |   |   |    |   |  |  |   |   |    |
| <i>B. clausii</i>                                                                                                                                                                                                                   | nd | nd  |   |   |    |   |  |  | - |   | -  |
| <i>L. plantarum</i> 299v                                                                                                                                                                                                            | nd | no  | - | - |    | - |  |  |   |   |    |
| <i>Bifido. lactis</i>                                                                                                                                                                                                               | nd | no  | + |   |    |   |  |  |   |   | 0  |
| <i>Bifido. breve</i>                                                                                                                                                                                                                | no | no  |   |   |    |   |  |  |   |   |    |
| <i>L. acidophilus</i> +<br><i>Bifido. longum</i>                                                                                                                                                                                    | no | --  |   |   |    |   |  |  |   |   |    |
| <i>L. rhamnosus</i><br>19070-2 +<br><i>L. reuteri</i> DSM                                                                                                                                                                           | nd | no  |   |   |    |   |  |  |   |   | 0  |
| <i>L. casei</i> +<br><i>Bifido. breve</i>                                                                                                                                                                                           | nd | no  |   |   |    |   |  |  |   |   |    |
| <i>L. paracasei</i> +<br><i>L. acidophilus</i> +<br><i>Bifido animalis</i>                                                                                                                                                          | nd | no  |   |   |    |   |  |  |   |   |    |
|                                                                                                                                                                                                                                     |    |     |   |   |    |   |  |  |   |   |    |
| <b>Pharmacokinetic only</b>                                                                                                                                                                                                         |    |     |   |   |    |   |  |  |   |   |    |
| <i>L. reuteri</i> 55730                                                                                                                                                                                                             | nd | nd  |   |   |    |   |  |  |   |   | +  |
| <i>L. johnsonii</i> La1                                                                                                                                                                                                             | nd | nd  |   |   | -  |   |  |  | + |   |    |
| <i>L. salivarius</i><br>UCC4331                                                                                                                                                                                                     | nd | nd  |   |   |    | - |  |  |   |   |    |
| <i>Bifido. infantis</i><br>35624                                                                                                                                                                                                    | nd | nd  |   |   |    | 0 |  |  |   |   |    |
| <i>Bifido. bifidum</i><br>MIMBb75                                                                                                                                                                                                   | nd | nd  |   |   |    | + |  |  |   |   |    |
| <i>L. rhamnosus</i> +<br><i>Bifido. longum</i>                                                                                                                                                                                      | nd | nd  |   |   |    |   |  |  |   |   |    |

\*including strain (when reported)

\*\* **Rank:** ++,  $\geq 2$  net RCTs (randomized controlled trials) with significant protective efficacy; +, only one net protective RCT; 0, equal number of significant and non-significant RCTs; -,  $\geq 1$  net non-significant RCT. Blank indicates no RCT done for the disease indication.

1  
2  
3 **Abbreviations:** nd, not determined; AAD, antibiotic associated diarrhea; CDI, Clostridium  
4 difficile infections; IBD, inflammatory bowel disease; IBS, irritable bowel syndrome; TD,  
5 traveler's diarrhea; BV, bacterial vaginosis; Acute Ped Diar, treatment of acute pediatric  
6 diarrhea.  
7  
8  
9  
10  
11  
12  
13  
14  
15  
16  
17  
18  
19  
20  
21  
22  
23  
24  
25  
26  
27  
28  
29  
30  
31  
32  
33  
34  
35  
36  
37  
38  
39  
40  
41  
42  
43  
44  
45  
46  
47  
48  
49  
50  
51  
52  
53  
54  
55  
56  
57  
58  
59  
60

For peer review only



1  
2  
3  
4  
5  
6 **Contributorship statement:** The listed author made substantial contributions to the conception  
7 and design, acquisition of data, analysis and interpretation of the data, drafting the article and  
8 revising it critically for important intellectual content and had final approval of the version to be  
9 published. No person or persons other than the author has contributed significantly to its  
10 preparation. This manuscript (in full or in part) is not under consideration for publication in any  
11 other journal, nor is a duplicative paper.  
12  
13  
14  
15  
16  
17  
18

19 **Competing interests:** The author has been a paid lecturer for the following companies:  
20 Biocodex, Inc., Lallemand. The author is a member of the Scientific Advisory Board for BioK  
21 Plus International. Biocodex Inc. provided travel expenses for the author to a scientific meeting.  
22  
23  
24  
25

26 **Funding:** This systematic review was unfunded.  
27  
28

29 **Data Sharing:** No additional data available.  
30  
31  
32  
33  
34  
35  
36  
37  
38  
39  
40  
41  
42  
43  
44  
45  
46  
47  
48  
49  
50  
51  
52  
53  
54  
55  
56  
57  
58  
59  
60

## References

1. Katan MB. Why the European Food Safety Authority was right to reject health claims for probiotics. *Benef Microbes* 2012 Jun 1;3(2):85-9.
2. Donovan SM, Schneeman B, Gibson GR, et al. Establishing and evaluating health claims for probiotics. *Amer Soc Nutr Adv Nutri* 2012;3:723-725.
3. European Food Safety Authority (EFSA). Guidance on the scientific requirements for health claims related to gut and immune function. *EFSA Journal* 2011;9(4):1984.
4. Binnendijk KH, Rijkers GT. What is a health benefit? An evaluation of EFSA opinions on health benefits with reference to probiotics. *Benef Microbes* 2013 Sep;4(3):223-30.
5. McFarland LV. Systematic review and meta-analysis of *Saccharomyces boulardii* in adult patients. *World J Gastroenterol* 2010;16(18):2202-22.
6. Buts JP, Stilmant C, Bernasconi P, et al. Characterization of alpha,alpha-trehalase released in the intestinal lumen by the probiotic *Saccharomyces boulardii*. *Scand J Gastroenterol* 2008;43(12):1489-96.
7. McFarland LV. Antibiotic-associated diarrhea: epidemiology, trends and treatment. *Future Microbiol* 2008;3(5):563-578.
8. Dethlefsen L, Huse S, Sogin ML, et al. The Pervasive Effects of an Antibiotic on the Human Gut Microbiota, as Revealed by Deep 16S rRNA Sequencing. *PLoS Biol* 2008;6(11):e280.
9. McFarland LV. Normal flora: diversity and functions. *Microb Ecol Health Dis* 2000;12:193-207.
10. Sanders ME. Impact of probiotics on colonizing microbiota of the gut. *J Clin Gastroenterol* 2011;45(3):S115-S119.
11. Young VB, Schmidt TM. Antibiotic-associated diarrhea accompanied by large-scale alterations in the composition of the fecal microbiota. *J Clin Microbiol* 2004 Mar;42(3):1203-6.
12. Nylund L, Satokari R, Nikkilä J, et al. Microarray analysis reveals marked intestinal microbiota aberrancy in infants having eczema compared to healthy children in at-risk for atopic disease. *BMC Microbiol* 2013 Jan 23;13:12.
13. Prince T, McBain AJ, O'Neill CA. *Lactobacillus reuteri* protects epidermal keratinocytes from *Staphylococcus aureus*-induced cell death by competitive exclusion. *Appl Environ Microbiol* 2012;78(15):5119-26.

14. Vitali B, Cruciani F, Baldassarre ME, et al. Dietary supplementation with probiotics during late pregnancy: outcome on vaginal microbiota and cytokine secretion. *BMC Microbiol* 2012;12:236.
15. Nugent RP, Krohn MA, Hillier SL. Reliability of diagnosing bacterial vaginosis is improved by a standardized method of gram stain interpretation. *J Clin Microbiol* 1991;29(2):297-301.
16. Ciprandi G, Vizzaccaro A, Cirillo I, et al. *Bacillus clausii* exerts immuno-modulatory activity in allergic subjects: a pilot study. *Eur Ann Allergy Clin Immunol* 2005;37(4):129-34.
17. Marseglia GL, Tosca M, Cirillo I, Licari A, Leone M, Marseglia A, Castellazzi AM, Ciprandi G. Efficacy of *Bacillus clausii* spores in the prevention of recurrent respiratory infections in children: a pilot study. *Ther Clin Risk Manag* 2007;3(1):13-7.
18. Iniesta M, Herrera D, Montero E, et al. Probiotic effects of orally administered *Lactobacillus reuteri*-containing tablets on the subgingival and salivary microbiota in patients with gingivitis. A randomized clinical trial. *J Clin Periodontol* 2012;39(8):736-44.
19. Shah MP, Gujjari SK, Chandrasekhar VS. Evaluation of the effect of probiotic (inersan®) alone, combination of probiotic with doxycycline and doxycycline alone on aggressive periodontitis - a clinical and microbiological study. *J Clin Diagn Res* 2013;7(3):595-600
20. Teughels W, Durukan A, Ozcelik O, et al. Clinical and microbiological effects of *Lactobacillus reuteri* probiotics in the treatment of chronic periodontitis: a randomized placebo-controlled study. *J Clin Periodontol* 2013;40(11):1025-35.
21. Kleessen B, Bezirtzoglou E, Matto J. culture-based knowledge on biodiversity, development and stability of human gastrointestinal microflora. *Micro Ecol in Health and Dis* 2000;12 (S2):53-63.
22. Schmeisser C, Steele H, Streit WR. Metagenomics, biotechnology with non-culturable microbes. *Appl Microbiol Biotechnol* 2007 Jul;75(5):955-62.
23. Preidis GA, Versalovic J. Targeting the human microbiome with antibiotics, probiotics, and prebiotics: gastroenterology enters the metagenomics era. *Gastroenterol* 2009;136(6):2015-31. PMID: 19462507.
24. Aagaard K, Petrosino J, Keitel W, et al. The Human Microbiome Project strategy for comprehensive sampling of the human microbiome and why it matters. *FASEB J* 2013;27(3):1012-22.
25. Handelsman J. Metagenomics: application of genomics to uncultured microorganisms. *Micro and Molecular Biol Review* 2004;68(4):669-685.

- 1  
2  
3  
4 26. Gill SR, Pop M, Deboy RT, et al. Metagenomic analysis of the human distal gut microbiome.  
5 *Science* 2006;312(5778):1355-9.  
6  
7 27. Frank DN, Pace NR. Gastrointestinal microbiology enters the metagenomics era. *Curr Opin*  
8 *Gastroenterol* 2008; 24:4-10.  
9  
10 28. Swidsinski A, Loening-Baucke V, Kirsch S, Doerffel Y. Functional biostructure of colonic  
11 microbiota (central fermenting area, germinal stock area and separating mucus layer) in healthy  
12 subjects and patients with diarrhea treated with *Saccharomyces boulardii*. *Gastroenterol Clin*  
13 *Biol* 2010;34 Suppl 1:S79-92.  
14  
15 29. Sanders ME, Guarner F, Guerrant R, et al. An update on the use and investigation of probiotics in  
16 health and disease. *Gut* 2013;62:787-796.  
17  
18 30. Moher D, Liberati A, Tetzlaff J, et al. Preferred Reporting Items for Systematic Reviews and Meta-  
19 Analyses: The PRISMA Statement. *BMJ* 2009;339: 332-336.  
20  
21 31. Franks AH, Harmsen HJ, Raangs GC, et al. Variations of bacterial populations in human feces  
22 measured by fluorescent *in situ* hybridization with group-specific 16S rRNA-targeted  
23 oligonucleotide probes. *Appl Environ Microbiol* 1998;64(9):3336-45.  
24  
25 32. Wada M, Nagata S, Saito M et al. Effects of the enteral administration of *Bifidobacterium breve* on  
26 patients undergoing chemotherapy for pediatric malignancies. *Support Care Cancer*  
27 2010;18(6):751-9.  
28  
29 33. Odamaki T, Xiao JZ, Iwabuchi N, et al. Influence of *Bifidobacterium longum* BB536 intake on  
30 faecal microbiota in individuals with Japanese cedar pollinosis during the pollen season. *J Med*  
31 *Microbiol* 2007;56(Pt 10):1301-8.  
32  
33 34. Seki H, Shiohara M, Matsumura T, et al. Prevention of antibiotic-associated diarrhea in children by  
34 *Clostridium butyricum* MIYAIRI. *Pediatrics International* 2003; 45: 86-90.  
35  
36 35. Mustafa RA, Santesso N, Brozek J, et al. The GRADE approach is reproducible in assessing the  
37 quality of evidence of quantitative evidence syntheses. *J Clin Epidemiol* 2013;66(7):736-42  
38  
39 36. McFarland LV. Meta-analysis of probiotics for prevention of antibiotic associated diarrhea and  
40 treatment of *Clostridium difficile* disease. *Am J Gastroenterol* 2006;101:812-822.  
41  
42 37. McFarland LV, Goh S. Preventing Pediatric Antibiotic-Associated Diarrhea and *Clostridium*  
43 *difficile* Infections with Probiotics: a meta-analysis. *World J Meta-analysis* 2013;1(3): 102-120.  
44  
45 38. Goldenberg JZ, Ma SS, Saxton JD, et al. Probiotics for the prevention of *Clostridium difficile*-  
46 associated diarrhea in adults and children. *Cochrane Database Syst Rev* 2013;5:CD006095.  
47  
48  
49  
50  
51  
52  
53  
54  
55  
56  
57  
58  
59  
60

- 1  
2  
3 39. Shen J, Zuo Z, Mao A. Effect of probiotics on inducing remission and matinaing therapy in  
4 ulcerative colitis, Crohn's disease, and pouchitis: meta-analysis of randomized controlled trials.  
5 *Inflamm Bowel Dis* 2014; 20(1): 21-35.  
6  
7  
8 40. McFarland LV and Dublin S. Meta-analysis of probiotics for the treatment of irritable bowel  
9 syndrome. *World J Gastroenterol* 2008;14(17):2650-61.  
10  
11 41. McFarland LV. Meta-analysis of probiotics for the prevention of traveler's diarrhea. *Travel Med*  
12 *Infect Dis* 2007; 5(2):97-105.  
13  
14 42. Huang H, Song L, Zhao W. Effects of probiotics for the treatment of bacterial vaginosis in adult  
15 women: a meta-analysis of randomized controlled trials. *Arch Gynecol Obstet* 2013 Dec; epub.  
16  
17 43. McFarland LV, Elmer GW and McFarland M. Meta-analysis of Probiotics for the Prevention and  
18 Treatment of Acute Pediatric Diarrhea. *Internl J Probiotics Prebiotics* 2006; 1(1):63-76.  
19  
20 44. Dinleyici EC, Eren M, Ozen M, et al. Effectiveness and safety of *Saccharomyces boulardii* for acute  
21 infectious diarrhea. *Expert Opin Biol Ther* 2012 Apr;12(4):395-410.  
22  
23 45. Szajewska H, Ruszczyński M, Kolaček S. Meta-analysis shows limited evidence for using  
24 *Lactobacillus acidophilus* LB to treat acute gastroenteritis in children. *Acta Paediatr* 2013 Oct  
25 31. ePub.  
26  
27 46. Alvaro E, Andrieux C, Rochet V, et al. Composition and metabolism of the intestinal microbiota in  
28 consumers and non-consumers of yogurt. *Br J Nutr* 2007;97:126-133.  
29  
30 47. Zubadalashvili NG, Makhviladze MA, Diasamidze MT, et al. [The comparative study of Linex and  
31 Lacto-G in treatment of adult patients with disbacteriosis]. Russian. *Georgian Med News*  
32 2009;170:38-42  
33  
34 48. Klein SM, Elmer GW, McFarland LV, et al. Recovery and elimination of the biotherapeutic agent,  
35 *Saccharomyces boulardii*, in healthy human volunteers. *Pharm Res* 1993;10(11):1615-9.  
36  
37 49. Rochet V, Rigottier-Gois L, Ledaire A, et al. *J Mol Microbiol Biotechnol* 2008;14(1-3):128-36.  
38 PMID: 17957120.  
39  
40 50. Engelbrekton AL, Korzenik JR, Sanders ME, et al. Analysis of treatment effects on the microbial  
41 ecology of the human intestine. *FEMS Microbiol Ecol* 2006;57(2):239-50.  
42  
43 51. Zoppi G, Cinquetti M, Benini A, et al. Modulation of the intestinal ecosystem by probiotics and  
44 lactulose in children during treatment with ceftriaxone. *Current Therapeutic Research*  
45 2001;62(5):418-35.  
46  
47  
48  
49  
50  
51  
52  
53  
54  
55  
56  
57  
58  
59  
60

- 1  
2  
3  
4 52. Orrhage K, Brismar B, Nord CE. Effects of supplements of *Bifidobacterium longum* and  
5  
6  
7  
8  
9  
10  
11  
12  
13  
14  
15  
16  
17  
18  
19  
20  
21  
22  
23  
24  
25  
26  
27  
28  
29  
30  
31  
32  
33  
34  
35  
36  
37  
38  
39  
40  
41  
42  
43  
44  
45  
46  
47  
48  
49  
50  
51  
52  
53  
54  
55  
56  
57  
58  
59  
60
52. Orrhage K, Brismar B, Nord CE. Effects of supplements of *Bifidobacterium longum* and  
*Lactobacillus acidophilus* on the intestinal microbiota during administration of clindamycin.  
*Microbial Ecology in Health and Disease* 1994; 7: 17-25.
53. Larsen N, Vogensen FK, Gøbel R, et al. Predominant genera of fecal microbiota in children with  
atopic dermatitis are not altered by intake of probiotic bacteria *Lactobacillus acidophilus* NCFM  
and *Bifidobacterium animalis* subsp. lactis Bi-07. *FEMS Microbiol Ecol* 2011;75(3):482-96.
54. Lidbeck A, Edlund C, Gustafsson JA, et al. Impact of *Lactobacillus acidophilus* on the normal  
intestinal microflora after administration of two antimicrobial agents. *Infection* 1988;16(6):329-  
36.
55. Black F, Einarsson K, Lidbeck A et al. Effect of lactic acid producing bacteria on the human  
intestinal microflora during ampicillin treatment. *Scand J Infect Dis* 1991;23(2):247-54.
56. Jernberg C, Sullivan A, Edlund C, et al. Monitoring of antibiotic-induced alterations in the human  
intestinal microflora and detection of probiotic strains by use of terminal restriction fragment  
length polymorphism. *Appl Environ Microbiol* 2005 Jan;71(1):501-6.
57. Madden JA, Plummer SF, Tang J, et al. Effect of probiotics on preventing disruption of the  
intestinal microflora following antibiotic therapy: a double-blind, placebo-controlled pilot study.  
*Int Immunopharmacol* 2005;5(6):1091-7.
58. Plummer SF, Garaiova I, Sarvotham T, et al. Effects of probiotics on the composition of the  
intestinal microbiota following antibiotic therapy. *Int J Antimicrob Agents* 2005;26(1):69-74.
59. van der Aa LB, Heymans HS, van Aalderen WM, et al. Synbad Study Group. Effect of a new  
synbiotic mixture on atopic dermatitis in infants: a randomized-controlled trial. *Clin Exp Allergy*  
2010 May;40(5):795-804.
60. Lata J, Novotný I, Příbramská V, et al. The effect of probiotics on gut flora, level of endotoxin and  
Child-Pugh score in cirrhotic patients: results of a double-blind randomized study. *Eur J*  
*Gastroenterol Hepatol* 2007;19(12):1111-3.
61. Petricevic L, Witt A. The role of *Lactobacillus casei rhamnosus* Lcr35 in restoring the normal  
vaginal flora after antibiotic treatment of bacterial vaginosis. *BJOG* 2008;115(11):1369-74.
62. Nobaek S, Johansson ML, Molin G, et al. Alteration of intestinal microflora is associated with  
reduction in abdominal bloating and pain in patients with irritable bowel syndrome. *Am J*  
*Gastroenterol* 2000;95(5):1231-1238.

- 1  
2  
3 63. Klarin B, Johansson ML, Molin G, et al. Adhesion of the probiotic bacterium *Lactobacillus*  
4 *plantarum* 299v onto the gut mucosa in critically ill patients: a randomised open trial. *Crit Care*  
5 2005;9(3):R285-93.  
6  
7  
8 64. Klarin B, Molin G, Jeppsson B, et al. Use of the probiotic *Lactobacillus plantarum* 299 to reduce  
9 pathogenic bacteria in the oropharynx of intubated patients: a randomised controlled open pilot  
10 study. *Crit Care* 2008;12(6):R136.  
11  
12  
13 65. Girard-Pipau F, Pompei A, Schneider S, et al. Intestinal microflora, short chain and cellular fatty  
14 acids, influence of a probiotic *S. boulardii*. *Microb Ecology Health Dis* 2002; 14:220-227.  
15  
16  
17 66. Swidsinski A, Loening-Baucke V, Verstraelen H, et al. Biostructure of fecal microbiota in healthy  
18 subjects and patients with chronic idiopathic diarrhea. *Gastroenterology* 2008;135(2):568-79.  
19  
20  
21 67. Reid G, Beuerman D, Heinemann C, et al. Probiotic *Lactobacillus* dose required to restore and  
22 maintain a normal vaginal flora. *FEMS Immunol Med Microbiol* 2001;32(1):37-41.  
23  
24  
25 68. Reid G, Charbonneau D, Erb J, et al. Oral use of *Lactobacillus rhamnosus* GR-1 and *L. fermentum*  
26 RC-14 significantly alters vaginal flora: randomized, placebo-controlled trial in 64 healthy  
27 women. *FEMS Immunol Med Microbiol* 2003; 35: 131-4.  
28  
29  
30 69. Kirpich IA, Solovieva NV, Leikhter SN, et al. Probiotics restore bowel flora and improve liver  
31 enzymes in human alcohol-induced liver injury: a pilot study. *Alcohol* 2008 Dec;42(8):675-82.  
32  
33  
34 70. Hummelen R, Changalucha J, Butamanya NL, et al. *Lactobacillus rhamnosus* GR-1 and *L. reuteri*  
35 RC-14 to prevent or cure bacterial vaginosis among women with HIV. *Int J Gynaecol Obstet*  
36 2010;111(3):245-8.  
37  
38  
39 71. Uchida K, Takahashi T, Inoue M, et al. Immunonutritional effects during synbiotics therapy in  
40 pediatric patients with short bowel syndrome. *Pediatr Surg Int* 2007;23(3):243-8.  
41  
42  
43 72. Mastromarino P, Macchia S, Meggiorini L, et al. Effectiveness of *Lactobacillus*-containing vaginal  
44 tablets in the treatment of symptomatic bacterial vaginosis. *Clin Microbiol Infect* 2009;15(1):67-  
45 74.  
46  
47  
48 73. Roessler A, Forssten SD, Gleis M, et al. The effect of probiotics on faecal microbiota and genotoxic  
49 activity of faecal water in patients with atopic dermatitis: a randomized, placebo-controlled  
50 study. *Clin Nutr* 2012;31(1):22-9.  
51  
52  
53 74. Kajander K, Hatakka K, Poussa T, et al. A probiotic mixture alleviates symptoms in irritable bowel  
54 syndrome patients: a controlled 6 month intervention. *Aliment Pharmacol Ther* 2005;22:387-94.  
55  
56  
57  
58  
59  
60

- 1  
2  
3  
4 75. Lyra A, Krogius-Kurikka L, Nikkilä J, et al. Effect of a multispecies probiotic supplement on  
5 quantity of irritable bowel syndrome-related intestinal microbial phylotypes. *BMC Gastroenterol*  
6 2010;10:110.  
7  
8  
9 76. Wong VW, Tse CH, Lam TT, et al. Molecular characterization of the fecal microbiota in patients  
10 with nonalcoholic steatohepatitis--a longitudinal study. *PLoS One* 2013 Apr 25;8(4):e62885.  
11  
12 77. Venturi A, Gionchetti P, Rizzello F, et al. Impact on the composition of the faecal flora by a new  
13 probiotic preparation: preliminary data on maintenance treatment of patients with ulcerative  
14 colitis. *Aliment Pharmacol Ther* 1999;13(8):1103-8.  
15  
16  
17 78. Brigidi P, Vitali B, Swennen E, et al. Effects of probiotic administration upon the composition and  
18 enzymatic activity of human fecal microbiota in patients with irritable bowel syndrome or  
19 functional diarrhea. *Res Microbiol* 2001; 152:735-41.  
20  
21  
22 79. Kuhbacher T, Ott SJ, Helwig U, et al. Bacterial and fungal microbiota in relation to probiotic therapy  
23 (VSL#3) in pouchitis. *Gut* 2006;55:833-41.  
24  
25  
26 80. Ng SC, Lam ERC, Lam TTY, et al. Effect of probiotic bacteria on the intestinal microbiota in  
27 irritable bowel syndrome. *J Gastroenterol Hepatol* 2013; 28:1624-1631.  
28  
29  
30 81. Oswari H, Prayitno L, Dwipoerwantoro PG, Firmansyah A, et al. Comparison of stool microbiota  
31 compositions, stool alpha1-antitrypsin and calprotectin concentrations, and diarrhoeal morbidity  
32 of Indonesian infants fed breast milk or probiotic/prebiotic-supplemented formula. *J Paediatr*  
33 *Child Health* 2013 June 18, ePub.  
34  
35  
36 82. Langhendries JP, Detry J, Van Hees J, et al. Effect of a fermented infant formula containing viable  
37 Bifidobacteria on the fecal flora composition and pH of healthy full-term infants. *J Ped*  
38 *Gastroenterol Nutr* 1995;21:177-81.  
39  
40  
41 83. Benno Y, Mitsuoka T. Impact of *Bifidobacterium longum* on human fecal microflora. *Microbiol*  
42 *Immunol* 1992;36(7):683-94.  
43  
44  
45 84. Fujiwara S, Seto Y, Kimura A, et al. Intestinal transit of an orally administered streptomycin-  
46 rifampicin-resistant variant of *Bifidobacterium longum* SBT2928: its long-term survival and  
47 effect on the intestinal microflora and metabolism. *J Applied Microbiology* 2001; 90: 43-52.  
48  
49  
50 85. Harmsen HJ, Raangs GC, Franks AH, et al. The effect of the prebiotic inulin and the probiotic  
51 *Bifidobacterium longum* on the fecal microflora of healthy volunteers measured by FISH and  
52 DGGE. *Micro Ecol Health Dis* 2002; 14:211-219.  
53  
54  
55  
56  
57  
58  
59  
60



- 1  
2  
3 86. Guerin-Danan C, Chabanet C, Pedone C, et al. Milk fermented with yogurt cultures and  
4 *Lactobacillus casei* compared with yogurt and gelled milk: influence on intestinal microflora in  
5 healthy infants. *Am J Clin Nutri* 1998;67:111-117.  
6  
7  
8  
9 87. Rochet V, Rigottier-Gois L, Sutren M, et al., Doré J. Effects of orally administered *Lactobacillus*  
10 *casei* DN-114 001 on the composition or activities of the dominant faecal microbiota in healthy  
11 humans. *Br J Nutr* 2006;95(2):421-9.  
12  
13  
14 88. Rochet V, Rigottier-Gois L, Levenez F, et al. Modulation of *Lactobacillus casei* in ileal and fecal  
15 samples from healthy volunteers after consumption of a fermented milk containing *Lactobacillus*  
16 *casei* DN-114 001. *Can J Microbiol* 2008 Aug;54(8):660-7.  
17  
18  
19 89. Brunser O, Gotteland M, Cruchet S, et al. Effect of a milk formula with prebiotics on the intestinal  
20 microbiota of infants after an antibiotic treatment. *Pediatric Research* 2006;59(3):451-6.  
21  
22  
23 90. Goossens D, Jonkers D, Russel M, et al. The effect of *Lactobacillus plantarum* 299v on the bacterial  
24 composition and metabolic activity in faeces of healthy volunteers: a placebo-controlled study on  
25 the onset and duration of effects. *Aliment Pharmacol Ther* 2003;18(5):495-505.  
26  
27  
28 91. Goossens D, Jonkers D, Russel M, et al. Survival of the probiotic, *L. plantarum* 299v and its effects  
29 on the faecal bacterial flora, with and without gastric acid inhibition. *Dig Liver Dis*  
30 2005;37(1):44-50.  
31  
32  
33 92. Goossens DA, Jonkers DM, Russel MG, et al. The effect of a probiotic drink with *Lactobacillus*  
34 *plantarum* 299v on the bacterial composition in faeces and mucosal biopsies of rectum and  
35 ascending colon. *Aliment Pharmacol Ther* 2006;23(2):255-63.  
36  
37  
38 93. Berggren A, Soderberg L, Onning G, et al. Intestinal function, microflora and nutrient intake of  
39 children after administration of a fermented oat product containing *Lactobacillus plantarum*  
40 DSM 9843(299v). *Microb Ecol Health Dis* 2003;15:160-168.  
41  
42  
43 94. Karlsson C, Ahnén S, Molin G, et al. Probiotic therapy to men with incipient arteriosclerosis initiates  
44 increased bacterial diversity in colon: a randomized controlled trial. *Atherosclerosis*  
45 2010;208(1):228-33.  
46  
47  
48  
49 95. Gueimonde M, Sakata S, Kalliomäki M, et al. Effect of maternal consumption of lactobacillus GG  
50 on transfer and establishment of fecal bifidobacterial microbiota in neonates. *J Pediatr*  
51 *Gastroenterol Nutr* 2006;42(2):166-70.  
52  
53  
54  
55  
56  
57  
58  
59  
60

- 1  
2  
3 96. Sierra S, Lara-Villoslada F, Sempere L, et al. Intestinal and immunological effects of daily oral  
4 administration of *Lactobacillus salivarius* CECT5713 to healthy adults. *Anaerobe*  
5 2010;16(3):195-200.  
6  
7  
8 97. Vanhoutte T, De Preter V, De Brandt E, et al. Molecular monitoring of the fecal microbiota of  
9 healthy human subjects during administration of lactulose and *Saccharomyces boulardii*. *Appl*  
10 *Environ Microbiol* 2006;72(9):5990-7.  
11  
12  
13 98. Zhong Y, Huang CY, He T, et al. [Effect of probiotics and yogurt on colonic microflora in subjects  
14 with lactose intolerance]. *Wei Sheng Yan Jiu* 2006;35(5):587-91. Chinese.  
15  
16  
17 99. He T, Priebe MG, Zhong Y, et al. Effects of yogurt and bifidobacteria supplementation on the  
18 colonic microbiota in lactose-intolerant subjects. *J Appl Microbiol* 2008;104(2):595-604.  
19  
20  
21 100. Yang YJ, Sheu BS. Probiotics-containing yogurts suppress *Helicobacter pylori* load and modify  
22 immune response and intestinal microbiota in the *Helicobacter pylori*-infected children.  
23 *Helicobacter* 2012;17(4):297-304.  
24  
25  
26 101. Mah KW, Chin VI, Wong WS, et al. Effect of a milk formula containing probiotics on the fecal  
27 microbiota of Asian infants at risk of atopic diseases. *Pediatr Res* 2007;62(6):674-9.  
28  
29  
30 102. Rafter J, Bennett M, Caderni G, et al. Dietary synbiotics reduce cancer risk factors in  
31 polypectomized and colon cancer patients. *Am J Clin Nutr* 2007;85(2):488-96.  
32  
33  
34 103. Kubota A, He F, Kawase M, et al. Lactobacillus strains stabilize intestinal microbiota in Japanese  
35 cedar pollinosis patients. *Microbiol Immunol* 2009;53(4):198-205.  
36  
37  
38 104. Morelli L, Zonenschain D, Callegari ML, et al. Assessment of a new synbiotic preparation in  
39 healthy volunteers: survival, persistence of probiotic strains and its effect on the indigenous  
40 flora. *Nutr J* 2003;2:11.  
41  
42  
43 105. Sullivan A, Nord CE, Evengard B. Effect of supplement with lactic-acid producing bacteria on  
44 fatigue and physical activity in patients with chronic fatigue syndrome. *Nutr J* 2009;8:1-6.  
45  
46  
47 106. McNulty NP, Yatsunenko T, Hsiao A, Faith JJ, et al. The impact of a consortium of fermented milk  
48 strains on the gut microbiome of gnotobiotic mice and monozygotic twins. *Sci Transl Med*  
49 2011;3(106):106ra106.  
50  
51  
52 107. Guarner F, Khan AG, Garisch J, et al. World Gastroenterology Organization. World  
53 Gastroenterology Organisation Global Guidelines: probiotics and prebiotics October 2011. *J Clin*  
54 *Gastroenterol* 2012;46(6):468-81.  
55  
56  
57  
58  
59  
60

- 1  
2  
3 108. United States Department of Health and Human Services Food and Drug Administration, Center  
4 for Food Safety and Applied Nutrition. Dietary Supplements Guidance Documents and  
5 Regulatory Information. 2008. Available at:  
6  
7 [http://www.fda.gov/food/guidanceregulation/guidancedocumentsregulatoryinformation/dietarysu](http://www.fda.gov/food/guidanceregulation/guidancedocumentsregulatoryinformation/dietarysupplements/default.htm)  
8 [pplements/default.htm](http://www.fda.gov/food/guidanceregulation/guidancedocumentsregulatoryinformation/dietarysupplements/default.htm). Accessed: May 29, 2014.  
9  
10  
11 109. Barc MC, Charrin-Sarnel C, Rochet V, et al. Molecular analysis of the digestive microbiota in a  
12 gnotobiotic mouse model during antibiotic treatment: Influence of *Saccharomyces boulardii*.  
13 *Anaerobe* 2008;14(4):229-33.  
14  
15 110. O'Hara AM, Shanahan F. The gut flora as a forgotten organ. *EMBO Reports* 2006;7:688-693.  
16  
17 111. Masood MI, Qadir MI, Shirazi JH, et al. Beneficial effects of lactic acid bacteria on human beings.  
18 *Crit Rev Microbiol* 2011;37(1):91-8.  
19  
20 112. Rijkers GT, de Vos WM, Brummer RJ, et al. Health benefits and health claims of probiotics:  
21 bridging science and marketing. *Br J Nutr* 2011;106(9):1291-6.  
22  
23  
24  
25  
26  
27  
28  
29  
30  
31  
32  
33  
34  
35  
36  
37  
38  
39  
40  
41  
42  
43  
44  
45  
46  
47  
48  
49  
50  
51  
52  
53  
54  
55  
56  
57  
58  
59  
60

1  
2  
3  
4  
5  
6  
7  
8  
9  
10  
11  
12  
13  
14  
15  
16 **Figure 1.** Time sequence of events and three models of study designs determining three different  
17  
18 degrees of dysbiosis correction by probiotics.  
19  
20  
21  
22  
23  
24  
25  
26  
27  
28  
29  
30  
31  
32  
33  
34  
35  
36  
37  
38  
39  
40  
41  
42  
43  
44  
45  
46  
47  
48  
49  
50  
51  
52  
53  
54  
55  
56  
57  
58  
59  
60

Peer review only

1  
2  
3  
4  
5  
6  
7  
8  
9  
10  
11  
12  
13  
14  
15  
16  
17  
18  
19  
20  
21  
22  
23  
24  
25  
26  
27  
28  
29  
30  
31  
32  
33  
34  
35  
36  
37  
38  
39  
40  
41  
42  
43  
44  
45  
46  
47  
48  
49  
50  
51  
52  
53  
54  
55  
56  
57  
58  
59  
60

**Figure 2.** Flow-chart of literature review results (1985-2013) of included and excluded studies for the restoration or improvement of normal microbiota by probiotics. Abbreviations: RCT, randomized-controlled trials; MOA, mechanism of action; NM, normal microbiota

For peer review only

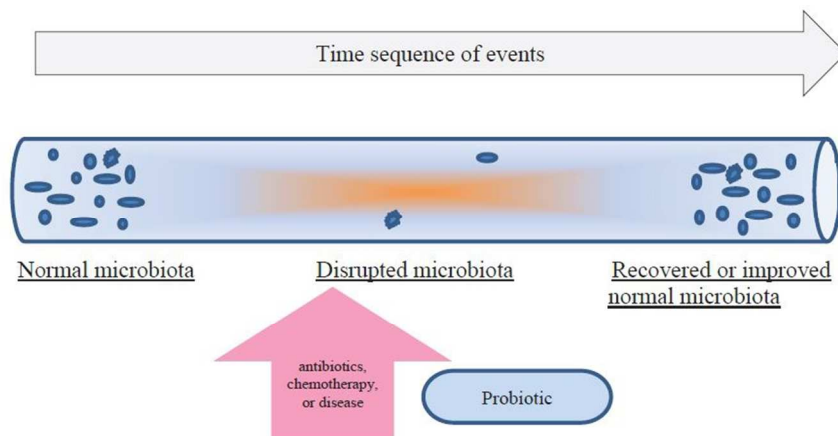

| Model | Type of population enrolled                | Dysbiosis at baseline | Time microbiota disrupted | Probiotic or control intervention | Potential outcomes  |
|-------|--------------------------------------------|-----------------------|---------------------------|-----------------------------------|---------------------|
| A     | Healthy volunteers or at-risk patients     | no                    | post-baseline             | preventive                        | restoration         |
| B     | Patients with active disease at enrollment | yes                   | pre-baseline              | treatment                         | altered or improved |
| C     | Healthy volunteers                         | no                    | not disrupted             | preventive                        | altered             |

Time sequence of events and three models of study designs determining three different degrees of dysbiosis correction by probiotics.  
272x231mm (96 x 96 DPI)

For peer review only

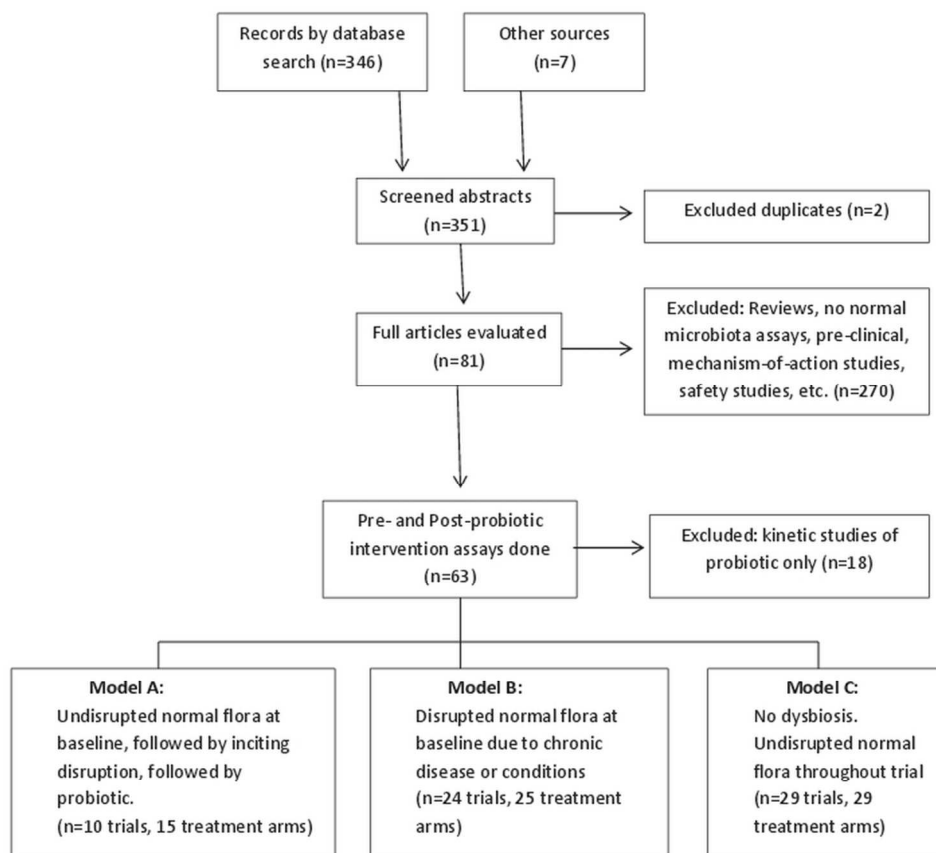

37  
38  
39  
40  
41  
42  
43  
44  
45  
46  
47  
48  
49  
50  
51  
52  
53  
54  
55  
56  
57  
58  
59  
60

Flow-chart of literature review results (1985-2013) of included and excluded studies for the restoration or improvement of normal microbiota by probiotics. Abbreviations: RCT, randomized-controlled trials; MOA, mechanism of action; NM, normal microbiota.  
101x90mm (300 x 300 DPI)

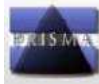

# PRISMA 2009 Checklist

1  
2  
3  
4  
5  
6  
7  
8  
9  
10  
11  
12  
13  
14  
15  
16  
17  
18  
19  
20  
21  
22  
23  
24  
25  
26  
27  
28  
29  
30  
31  
32  
33  
34  
35  
36  
37  
38  
39  
40  
41  
42  
43  
44  
45  
46  
47  
48  
49

| Section/topic             | # | Checklist item                                                                                                                                                                                                                                                                                                                                                                                                                                                                                                                                                                                                                                                                                                                                                                                                                                | Reported on page # |
|---------------------------|---|-----------------------------------------------------------------------------------------------------------------------------------------------------------------------------------------------------------------------------------------------------------------------------------------------------------------------------------------------------------------------------------------------------------------------------------------------------------------------------------------------------------------------------------------------------------------------------------------------------------------------------------------------------------------------------------------------------------------------------------------------------------------------------------------------------------------------------------------------|--------------------|
| <b>TITLE</b>              |   |                                                                                                                                                                                                                                                                                                                                                                                                                                                                                                                                                                                                                                                                                                                                                                                                                                               |                    |
| Title                     | 1 | Identify the report as a systematic review, meta-analysis, or both.<br><b>This is a systematic review</b>                                                                                                                                                                                                                                                                                                                                                                                                                                                                                                                                                                                                                                                                                                                                     | 1                  |
| <b>ABSTRACT</b>           |   |                                                                                                                                                                                                                                                                                                                                                                                                                                                                                                                                                                                                                                                                                                                                                                                                                                               |                    |
| Structured summary        | 2 | Provide a structured summary including, as applicable: background; objectives; data sources; study eligibility criteria, participants, and interventions; study appraisal and synthesis methods; results; limitations; conclusions and implications of key findings; systematic review registration number.                                                                                                                                                                                                                                                                                                                                                                                                                                                                                                                                   | 2                  |
| <b>INTRODUCTION</b>       |   |                                                                                                                                                                                                                                                                                                                                                                                                                                                                                                                                                                                                                                                                                                                                                                                                                                               |                    |
| Rationale                 | 3 | Describe the rationale for the review in the context of what is already known.<br><b>Probiotics are promising candidates to prevent or treat disease, but are typically supported by structure/function claims in most countries. The function claim for the restoration of normal microbiota is commonly cited in efficacy trials, but the evidence for this claim has not been examined systematically for all probiotic strains. Differences in study populations and study design effect the type of conclusions that can be drawn. This is the first systematic review and proof of principle of this type of analysis for the function claim of dysbiosis.</b>                                                                                                                                                                          | 4-5                |
| Objectives                | 4 | Provide an explicit statement of questions being addressed with reference to participants, interventions, comparisons, outcomes, and study design (PICOS).<br><b>A comprehensive literature review of the evidence from randomized controlled trials will discuss the strength of the evidence for the restoration or improvement of dysbiosis by specific probiotic strain. The interventions include probiotic or control (typically placebo) given for a specific time enrolled in clinical trials for either the prevention or treatment of disease. All trials which stated some impact on the normal microbiota will be reviewed and analyzed for the ability to document changes in the normal microbiota. The outcomes are the degree of dysbiosis restoration depending upon the study design and type of enrolled participants.</b> | 5                  |
| <b>METHODS</b>            |   |                                                                                                                                                                                                                                                                                                                                                                                                                                                                                                                                                                                                                                                                                                                                                                                                                                               |                    |
| Protocol and registration | 5 | Indicate if a review protocol exists, if and where it can be accessed (e.g., Web address), and, if available, provide registration information including registration number.<br><b>Review protocol is described in Methods section of paper.<br/>Prospero registration number is: CRD42014007224</b>                                                                                                                                                                                                                                                                                                                                                                                                                                                                                                                                         | 5-9                |
| Eligibility criteria      | 6 | Specify study characteristics (e.g., PICOS, length of follow-up) and report characteristics (e.g., years considered, language, publication status) used as criteria for eligibility, giving rationale.<br><b>Participants: without restriction, any enrolled in clinical trial (adults and pediatrics)</b>                                                                                                                                                                                                                                                                                                                                                                                                                                                                                                                                    | 6                  |



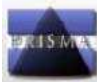

# PRISMA 2009 Checklist

1  
2  
3  
4  
5  
6  
7  
8  
9  
10  
11  
12  
13  
14  
15  
16  
17  
18  
19  
20  
21  
22  
23  
24  
25  
26  
27  
28  
29  
30  
31  
32  
33  
34  
35  
36  
37  
38  
39  
40  
41  
42  
43  
44  
45  
46  
47  
48  
49

|                         |    |                                                                                                                                                                                                                                                                                                                                                                                                                                                                                                                                                                                                                                                                                                                                                                                                                               |     |
|-------------------------|----|-------------------------------------------------------------------------------------------------------------------------------------------------------------------------------------------------------------------------------------------------------------------------------------------------------------------------------------------------------------------------------------------------------------------------------------------------------------------------------------------------------------------------------------------------------------------------------------------------------------------------------------------------------------------------------------------------------------------------------------------------------------------------------------------------------------------------------|-----|
|                         |    | <p><b>Interventions: all probiotics</b><br/> <b>Comparisons: controlled (typically placebo)</b><br/> <b>Outcomes: microbiologic assays of the intestinal flora or microbiota</b><br/> <b>Study design: required to have pre-intervention (baseline) and post-intervention microbiological assays</b><br/> <b>Length of follow-up: unrestricted</b><br/> <b>Language: unrestricted</b><br/> <b>Publication and years considered: peer-reviewed publications from PubMed (1985-2013, unless otherwise noted), EMBASE, Cochrane Database (1990-2013), CINAHL, AMED, ISI Web of Science (2000-2013). On-line trial registries: (Cochrane Central Register of Controlled trials, MetaRegister of Controlled Trials, and National Institutes of Health.</b></p>                                                                     |     |
| Information sources     | 7  | <p>Describe all information sources (e.g., databases with dates of coverage, contact with study authors to identify additional studies) in the search and date last searched.</p> <p><b>See item above</b></p>                                                                                                                                                                                                                                                                                                                                                                                                                                                                                                                                                                                                                | 6   |
| Search                  | 8  | <p>Present full electronic search strategy for at least one database, including any limits used, such that it could be repeated.</p> <p><b>All probiotics + health claims, structure/function claims, normal microbiota, normal intestinal flora, dysbiosis, pharmacokinetics, metagenomics, dietary supplements, randomized controlled trials, antibiotic-associated diarrhea, Clostridium difficile infections, H. pylori treatments, inflammatory bowel disease, irritable bowel disease, travelers diarrhea, bacterial vaginosis or vaginitis, treatment of pediatric acute diarrhea, healthy volunteer trials and specific probiotic strains. (PubMed)</b></p>                                                                                                                                                           | 5-6 |
| Study selection         | 9  | <p>State the process for selecting studies (i.e., screening, eligibility, included in systematic review, and, if applicable, included in the meta-analysis).</p> <p><b>Screening:</b><br/> <b>Eligibility: Must have at least one pre-intervention (baseline) microbiological assay of normal flora or metagenomic analysis and one post-intervention (post-probiotic) assay. Genus and species of probiotic strain(s) provided. Normal microbiota assayed during a randomized, controlled trial.</b><br/> <b>Excluded: pre-clinical studies, safety studies, reviews, mechanism of action studies, case reports or case series, duplicate reports, unspecified type of probiotics.</b></p>                                                                                                                                   | 6-7 |
| Data collection process | 10 | <p>Describe method of data extraction from reports (e.g., piloted forms, independently, in duplicate) and any processes for obtaining and confirming data from investigators.</p> <p><b>Pilot data extraction form used modified from standard meta-analysis data extraction form (McFarland and Goh 2013, World J Gastroenterol). Questionable results were queried from original authors of papers.</b></p>                                                                                                                                                                                                                                                                                                                                                                                                                 | 6   |
| Data items              | 11 | <p>List and define all variables for which data were sought (e.g., PICOS, funding sources) and any assumptions and simplifications made.</p> <p><b>The timing and type of microbiologic assays of intestinal or vaginal microbiota were collected. As the literature review has a length inclusion period (1985-2013), the types of microbiologic assays have evolved, but all types were included from basic microbiologic assays to metagenomic profiling. The type of probiotic intervention was collected by genus, species and strain (if stated in paper). Types of normal microbiota assays varied by technique. The patient population (healthy volunteers, acute disease or chronic disease) was also collected. Also collected: study size, type of disruptive factor, follow-up duration, stated claims in</b></p> | 7-8 |

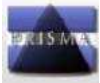

## PRISMA 2009 Checklist

|                                    |    |                                                                                                                                                                                                                                                                                                                                                                                                                                       |    |
|------------------------------------|----|---------------------------------------------------------------------------------------------------------------------------------------------------------------------------------------------------------------------------------------------------------------------------------------------------------------------------------------------------------------------------------------------------------------------------------------|----|
|                                    |    | paper.                                                                                                                                                                                                                                                                                                                                                                                                                                |    |
| Risk of bias in individual studies | 12 | Describe methods used for assessing risk of bias of individual studies (including specification of whether this was done at the study or outcome level), and how this information is to be used in any data synthesis.<br><b>Quality of study design (restoration, improvement or no dysbiosis) was used when assessing quality of individual studies. These were then analyzed by stratification on the quality of study design.</b> | 8  |
| Summary measures                   | 13 | State the principal summary measures (e.g., risk ratio, difference in means).<br><b>NA, No pooled RR or DWMs used in this systematic review.</b>                                                                                                                                                                                                                                                                                      | na |
| Synthesis of results               | 14 | Describe the methods of handling data and combining results of studies, if done, including measures of consistency (e.g., $I^2$ ) for each meta-analysis.<br><b>NA, No pooled RR or DWMs used in this systematic review.</b>                                                                                                                                                                                                          | na |

Page 1 of 2

| Section/topic                 | #  | Checklist item                                                                                                                                                                                                                                                                               | Reported on page # |
|-------------------------------|----|----------------------------------------------------------------------------------------------------------------------------------------------------------------------------------------------------------------------------------------------------------------------------------------------|--------------------|
| Risk of bias across studies   | 15 | Specify any assessment of risk of bias that may affect the cumulative evidence (e.g., publication bias, selective reporting within studies).<br><b>All studies with microbiota were included to limit bias, but no measurement for publication bias was done for this systematic review.</b> | 8                  |
| Additional analyses           | 16 | Describe methods of additional analyses (e.g., sensitivity or subgroup analyses, meta-regression), if done, indicating which were pre-specified.<br><b>association of degree of dysbiosis correction with clinical efficacy by probiotic strain(s)</b>                                       | 8-9                |
| <b>RESULTS</b>                |    |                                                                                                                                                                                                                                                                                              |                    |
| Study selection               | 17 | Give numbers of studies screened, assessed for eligibility, and included in the review, with reasons for exclusions at each stage, ideally with a flow diagram.<br><b>See flow diagram, Figure 2.</b>                                                                                        | 25                 |
| Study characteristics         | 18 | For each study, present characteristics for which data were extracted (e.g., study size, PICOS, follow-up period) and provide the citations.<br><b>Extracted data were cited in tables. See paper-Tables 1-4.</b>                                                                            | 26-32              |
| Risk of bias within studies   | 19 | Present data on risk of bias of each study and, if available, any outcome level assessment (see item 12).<br><b>Presented in Discussion section.</b>                                                                                                                                         | 11-15              |
| Results of individual studies | 20 | For all outcomes considered (benefits or harms), present, for each study: (a) simple summary data for each intervention group (b) effect estimates and confidence intervals, ideally with a forest plot.<br><b>Cited in Tables 1-4.</b>                                                      | 26-32              |
| Synthesis of results          | 21 | Present results of each meta-analysis done, including confidence intervals and measures of consistency.<br><b>NA, this is a systematic review, not a meta-analysis.</b>                                                                                                                      | na                 |
| Risk of bias across studies   | 22 | Present results of any assessment of risk of bias across studies (see item 15).<br><small>For peer review only: <a href="http://bmjopen.bmj.com/site/about/guidelines.xhtml">http://bmjopen.bmj.com/site/about/guidelines.xhtml</a></small>                                                  | 18-19              |

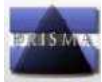

# PRISMA 2009 Checklist

|                     |    |                                                                                                                                                                                                                                                                                                                                                                                                                        |        |
|---------------------|----|------------------------------------------------------------------------------------------------------------------------------------------------------------------------------------------------------------------------------------------------------------------------------------------------------------------------------------------------------------------------------------------------------------------------|--------|
|                     |    | <b>Presented in Discussion section (bias due to study design).</b>                                                                                                                                                                                                                                                                                                                                                     |        |
| Additional analysis | 23 | Give results of additional analyses, if done (e.g., sensitivity or subgroup analyses, meta-regression [see Item 16]).                                                                                                                                                                                                                                                                                                  | 15-17  |
| <b>DISCUSSION</b>   |    |                                                                                                                                                                                                                                                                                                                                                                                                                        |        |
| Summary of evidence | 24 | Summarize the main findings including the strength of evidence for each main outcome; consider their relevance to key groups (e.g., healthcare providers, users, and policy makers).<br><b>Strength of the evidence is provided in the Results section.</b><br><b>Relevance to key groups is in the Discussion section.</b>                                                                                            | 19, 22 |
| Limitations         | 25 | Discuss limitations at study and outcome level (e.g., risk of bias), and at review-level (e.g., incomplete retrieval of identified research, reporting bias).<br><b>Provided in Discussion section and “Opportunities for Future Research” section and ‘Strengths and Weaknesses” section.</b>                                                                                                                         | 21-22  |
| Conclusions         | 26 | Provide a general interpretation of the results in the context of other evidence, and implications for future research.<br><b>The weight of the evidence for the function claim that probiotics can improve or restore normal microbiota is strong for a few probiotic strains, but in general, more confirmatory studies that are properly timed and designed are required for the majority of probiotic strains.</b> | 20-21  |
| <b>FUNDING</b>      |    |                                                                                                                                                                                                                                                                                                                                                                                                                        |        |
| Funding             | 27 | Describe sources of funding for the systematic review and other support (e.g., supply of data); role of funders for the systematic review.<br><b>This review was unfunded.</b>                                                                                                                                                                                                                                         | 23     |

From: Moher D, Liberati A, Tetzlaff J, Altman DG, The PRISMA Group (2009). Preferred Reporting Items for Systematic Reviews and Meta-Analyses: The PRISMA Statement. PLoS Med 6(6): e1000097. doi:10.1371/journal.pmed1000097

For more information, visit: [www.prisma-statement.org](http://www.prisma-statement.org).

# BMJ Open

## Use of probiotics to correct dysbiosis of normal microbiota following disease or disruptive events: a systematic review.

|                                 |                                                                                                                                                                                                                                               |
|---------------------------------|-----------------------------------------------------------------------------------------------------------------------------------------------------------------------------------------------------------------------------------------------|
| Journal:                        | <i>BMJ Open</i>                                                                                                                                                                                                                               |
| Manuscript ID:                  | bmjopen-2014-005047.R2                                                                                                                                                                                                                        |
| Article Type:                   | Research                                                                                                                                                                                                                                      |
| Date Submitted by the Author:   | 29-Jul-2014                                                                                                                                                                                                                                   |
| Complete List of Authors:       | McFarland, Lynne; Puget Sound VA, Health Services RandD                                                                                                                                                                                       |
| <b>Primary Subject Heading</b>: | Research methods                                                                                                                                                                                                                              |
| Secondary Subject Heading:      | Evidence based practice, Gastroenterology and hepatology, Infectious diseases, Nutrition and metabolism, Paediatrics                                                                                                                          |
| Keywords:                       | Microbiology < BASIC SCIENCES, CLINICAL PHARMACOLOGY, Adult gastroenterology < GASTROENTEROLOGY, Functional bowel disorders < GASTROENTEROLOGY, Gastrointestinal infections < GASTROENTEROLOGY, Inflammatory bowel disease < GASTROENTEROLOGY |
|                                 |                                                                                                                                                                                                                                               |

SCHOLARONE™  
Manuscripts

Peer review only

1  
2  
3  
4 **Use of probiotics to correct dysbiosis of normal microbiota following disease**  
5  
6  
7 **or disruptive events: a systematic review.**  
8  
9

10  
11 Lynne V. McFarland, PhD, MS

12  
13 Affiliate Associate Professor, Department of Medicinal Chemistry, School of Pharmacy,  
14 University of Washington, Seattle, Washington  
15  
16

17 **Corresponding author:** Lynne V. McFarland, PhD, MS

18  
19  
20 **Address:** Metropolitan Park West, 1100 Olive Way, Suite #1400, Seattle,  
21 WA 98101

22 **Telephone:** 206-277-1780

23 **Fax:** 206-764-2935

24 **E-mail address:** [LVMCFARL@u.washington.edu](mailto:LVMCFARL@u.washington.edu)  
25

26  
27 **Disclaimer:** *The findings and conclusions in this study are those of the author*  
28 *and do not represent the official position of the University.*  
29  
30

31  
32 The corresponding author has the right to grant on behalf of all authors and does grant on behalf  
33 of all authors, a worldwide licence to the Publishers and its licensees in perpetuity, in all  
34 forms, formats and media (whether known now or created in the future), to i) publish,  
35 reproduce, distribute, display and store the Contribution, ii) translate the Contribution  
36 into other languages, create adaptations, reprints, include within collections and create  
37 summaries, extract and/or, abstract of the Contribution, iii) create any other derivative  
38 work(s) based on the Contribution, iv) to exploit all subsidiary rights in the Contribution,  
39 v) the inclusion of electronic links from the Contribution to third party material where-  
40 ever it may be located; and vi) licence any third part to do any or all of the above.  
41  
42  
43

44 **Word Count** 6731

45 **Figures:** 2

46 **Tables:** 4  
47  
48  
49  
50  
51  
52  
53  
54  
55  
56  
57  
58  
59  
60

## ABSTRACT

**Objective:** To assess the evidence for the claim probiotics can correct dysbiosis of the normal microbiota resulting from disease or disruptive events.

**Setting:** Systematic review of published clinical trials of patients receiving a probiotic intervention for the prevention or treatment of various diseases.

**Data sources:** Sources searched (1985-2013): PubMed, EMBASE, Cochrane Database of Systematic Reviews, CINAHL, AMED, and ISI Web of Science. Three on-line clinical trial registries were searched: Cochrane Central Register of Controlled trials, MetaRegister of Controlled Trials, and National Institutes of Health.

**Review methods:** Included studies were randomized clinical trials of probiotic interventions having microbiologic assays. Studies were evaluated following PRISMA guidelines for specific probiotic strains. A standard data extraction form was used to collect the raw data.

**Outcome measures:** The primary outcome is the degree of microbiota correction by specific probiotic strains. Secondary outcome was the association between the degree of dysbiosis correction and clinical efficacy.

**Results:** The review of the literature found three distinct study designs: Model A (restoration) assayed patients enrolled with a healthy, undisturbed microbiota and then assayed post-disruptive event and probiotic therapy; Model B (alteration) assayed patients with pre-existing disrupted microbiota and then post-probiotic therapy; Model C (no dysbiosis) assayed volunteers with no disruptive event pre and post-probiotic. From a total of 63 trials, 83% of the probiotic products using Model A restored the microbiota, 56% using Model B improved the microbiota and only 21% using Model C had any effect on microbiota. Clinical efficacy was more commonly associated with strains capable of restoration of the normal microbiota.

**Conclusions:** The ability to assess the degree of dysbiosis improvement is dependent upon the enrolled population and the timing of microbiologic assays. The functional claim for correcting dysbiosis is poorly supported for most probiotic strains and requires further research.

**Systematic review registration:** PROSPERO (CRD42014007224)

## Strengths and Limitations

### Strengths include:

- A comprehensive review of the published literature from 1985-2013
- Literature search unrestricted by language or country
- Analysis of study designs resulted in novel strategy to limit bias and classify outcomes
- Three types of outcomes of dysbiosis applied to evidence-based studies of specific probiotic strains
- Author has over 40 years of research experience in the probiotic field

### Limitations include:

- Pooled clinical trials using different study populations
- Pooled probiotic doses and regimens
- Indirect evidence linking probiotic strains and dysbiosis
- Review done by sole author

## INTRODUCTION

The popularity of probiotics has expanded exponentially recently, but along with their increased use, debate rages on how probiotics should be regulated and whether probiotics should be considered as a medical food, drug or a food supplement. In the U.S., probiotics are typically available as dietary supplements and thus are limited to 'structure or function' health claims and, unlike prescription drugs, are not permitted to claim to 'treat' or 'cure' disease. In Europe and the United Kingdom, probiotics are allowed to have health or function claims. These claims are required to be supported by well-conducted human trials in the targeted population or in healthy volunteers, but the European Food Safety Authority (EFSA) has rejected >80% of claims submitted to them.<sup>1-3</sup> In many cases, scientific substantiation of a specific health claim was judged insufficient or based on an indirect effect.<sup>4</sup> One such functional claim made for probiotic products is they correct dysbiosis (or the disruption of bacterial and fungal species after antibiotics or other disruptive exposures) and thus may be beneficial to maintain health. Probiotics are active during this susceptible window from the time of the disruptive event to the time when normal microbiota is restored. A wide variety of mechanisms-of-action have been documented for probiotics (ranging from blocking pathogen attachment sites, destruction of the pathogen by bacteriocins or proteases that degrade toxins, to regulation of the immune system),<sup>5,6</sup> and while clinical evidence supports efficacy of some probiotic strains, the evidence linking these mechanisms-of-action to a specific health or function claims is not as clear.

A classic example of the consequence of dysbiosis is antibiotic-associated diarrhea (AAD).<sup>7,8</sup> While antibiotics may be effective in the elimination of pathogenic organisms, a common, unintended effect is the killing or inhibition of beneficial microbes due to shared susceptibility to the antibiotic. One of the many functions for normal microbiota is the ability to resist infection by pathogenic organisms, termed 'colonization resistance'.<sup>9,10</sup> The loss of a sub-population of the normal microbiota, for example, can lead to the loss of the ability to break down fibers and starches into absorbable short chain fatty acids, resulting in high level of undigested carbohydrates, which can trigger diarrhea.<sup>11</sup> Disruption of the normal microbiota has been shown to lead to higher rates of infections in other body systems other than the intestinal tract including the skin,<sup>12,13</sup> vagina,<sup>14,15</sup> respiratory tract,<sup>16,17</sup> and in the buccal cavity.<sup>18-20</sup>



1  
2  
3  
4  
5  
6 The major challenge to establishing a cause and effect for the improvement of dysbiosis by  
7 probiotics is a lack of a standard definition of 'normal' microbiota. There is substantial inter-  
8 individual variation of the species of microbes present at different body niches, which also varies  
9 by age, geographic area and health status of the host. In addition, a complete accounting of the  
10 microbiota is currently impossible, as there are no assays to detect all of  $>10^{13}$ - $10^{14}$  organisms in  
11 the intestines and standard microbial culturing methods miss 75-95% of these organisms.<sup>21,22</sup>  
12 The development of metagenomics (cataloguing individual and disease-specific bacterial gene  
13 profiles) and the creation of the international Human Microbiome Project ushered in a new era  
14 for our understanding of the complexity of these interactions within the body.<sup>23,24</sup> This paradigm  
15 shift from culturing to metagenomic analysis has expanded our ability to document shifts in  
16 microbial populations to an unparalleled degree, but the interpretation of these shifts continues to  
17 be under debate.<sup>25-28</sup> With the advent of these newer metagenomic tools, the role of probiotics in  
18 the restoration of normal microbiota is being re-visited.<sup>29</sup>  
19  
20  
21  
22  
23  
24  
25  
26  
27  
28  
29  
30  
31

32 In light of new guidance documents and recommendations, the goal of this systematic review is  
33 to determine how claims for the restoration of the normal microbiota and the correction of  
34 dysbiosis have been studied using well-designed trials and which probiotic strains have  
35 evidence-based data to support these claims.  
36  
37  
38  
39  
40  
41

## 42 **METHODS**

### 43 **Study Objective**

44 To systematically review the literature to analyse the evidence for the claim probiotics can  
45 correct dysbiosis of the normal microbiota from randomised controlled trials.  
46  
47  
48  
49  
50  
51

### 52 **Search Strategy**

53 Search terms included: probiotics + health claims, restoring normal microbiota, dysbiosis,  
54 normal microbiota, pharmacokinetics, metagenomics, probiotics, dietary supplements,  
55  
56  
57  
58  
59  
60

1  
2  
3 randomized controlled trials, antibiotic associated diarrhea (AAD), *Clostridium difficile* infection  
4 (CDI), inflammatory bowel disease (IBD), irritable bowel syndrome (IBS), traveler's diarrhea  
5 (TD), eradication of *Helicobacter pylori*, bacterial vaginosis or vaginitis, treatment of acute  
6 pediatric diarrhea, and specific probiotic strains or products. Search strategies were broad-based  
7 initially, then narrowed to clinical trials with probiotics.  
8  
9

### 13 14 **Data Sources**

15  
16 PubMed (1985-2013), EMBASE (1985-2013), Cochrane Database of Systematic Reviews  
17 (1990-2013), CINAHL (1985-2013), AMED (1985-2013), and ISI Web of Science (2000-2013).  
18 Three on-line clinical trial registries were searched: Cochrane Central Register of Controlled  
19 trials (<http://www.cochrane.org>), MetaRegister of Controlled Trials (<http://www.controlled->  
20 [trials.com/mrct](http://www.controlled-trials.com/mrct)) and National Institutes of Health (<http://www.clinicaltrials.gov>).  
21  
22  
23  
24  
25  
26

### 27 **Criteria for study selection and data extraction**

28 Abstracts of all citations were reviewed by a single author and rated for inclusion for randomized  
29 controlled trials of probiotic treatments. Full articles were retrieved if normal microbiota assays  
30 were mentioned. Non-English language trials were translated and included whenever possible.  
31 Exclusion criteria included pre-clinical studies (animal models or *in vitro* assays), safety or phase  
32 2 studies, reviews, efficacy trials with no assays for normal microbiota species, metagenomic  
33 methods only, mechanism of action of normal microbiota or probiotic, cross-sectional surveys,  
34 case reports or case series, duplicate reports, or trials of unspecified types of probiotics. All  
35 pharmacokinetic studies in humans were reviewed, as abstracts often did not include normal  
36 microbiota assay data. Data extraction and the review process followed the PRISMA statement  
37 guidelines using a 27-item checklist and flow diagram.<sup>30</sup> A standardized data extraction form  
38 was used to collect data on the probiotic (strain type, daily dose, duration), type of controls  
39 (placebo, active or no treatment), study design (status of microbiota at baseline and follow-up  
40 times), type of microbiota assay (microbial culturing, molecular biomarkers, etc.), enrolled study  
41 population (adult vs. pediatric, healthy volunteers, disease condition), type and timing of  
42 disruptive agent (antibiotics, chemotherapy, etc.), study size and attrition, outcome assessment  
43 (efficacy and/or microbiota status at end of study, adverse events) and type of health claim.  
44  
45  
46  
47  
48  
49  
50  
51  
52  
53  
54  
55  
56  
57  
58  
59  
60

## Outcomes and definitions

The primary outcome is the degree of microbiota correction or improvement by specific probiotic strain(s). The secondary outcome is the association between the degree of dysbiosis correction and the net efficacy found from randomized controlled trials of probiotic interventions. Dysbiosis is defined as an alteration or disruption of the normal microbiota (bacterial or fungal species) due to exposure of an disruptive factor (such as antibiotics, chronic disease, stress, medical procedures or medications, etc.). As there is no current standard definition of 'normal' microbiota, for this review, restoration of normal microbiota is defined as a return to the assayed microbial species or profile taken from a healthy individual (before a disruptive event has occurred). Included studies are required to have at least a pre-probiotic treatment assay and a post-probiotic treatment assay. A variety of microbial assays were available during the search period (1985-2013), including documentation of the microbiota by either microbial cultures, or metagenomic methods [16s rRNA-targeted probes using fluorescent *in situ* hybridization (FISH) or other polymerase chain reaction (PCR) technique]<sup>8,21,28,31</sup> or by indirect methods (Nugent scores).<sup>15</sup> Nugent scores (ranged 0-10) are used to diagnose bacterial vaginosis (scores  $\geq 7$ ) or normal vaginal microbiota (scores 0-3) based on the quantitated morphotypes of small gram negative rods (*G. vaginalis/Bacteroides* spp.) and curved gram negative rods (*Mobiluncus* spp.) from gram stains of vaginal discharge smears. Microbial assays of only the strain(s) contained in the probiotic product are considered as pharmacokinetic studies and were not included in the normal microbiota profiles.

**Models of dysbiosis.** To determine the impact on normal microbiota, only direct evidence of microbiota change (species, profiles, diversity indices, or diagnostic criteria) were included and indirect effects were excluded (changes in intestinal enzymes, immune system parameters or disease symptoms). The degree to which dysbiosis was improved is categorized into three levels: (1) recovery of the normal microbiota back to baseline levels; (2) alteration or improvement of the normal microbiota; and (3) no change in normal microbiota.

The literature contained three dysbiosis models: Model A (restoration of the normal microbiota), which assayed patients enrolled with a healthy, undisturbed microbiota and then assayed again after a disruptive event (such as antibiotic exposure) and probiotic therapy occurred; Model B (alteration of the microbiota) assayed patients with pre-existing disrupted microbiota (for

1  
2  
3 example, pre-existing chronic disease or active disease) and then post-probiotic therapy; Model  
4 C (no dysbiosis) assayed volunteers with no disruptive event (before or during the clinical trial)  
5 at both pre-probiotic and post-probiotic times, as shown in Figure 1. 'Recovery' of the normal  
6 microbiota is defined as a restoration of the microbiota back to a normal healthy baseline.  
7 Recovery may be complete recovery (all assayed microbial levels returned to baseline) or  
8 incomplete recovery (partial recovery of some microbial strains, but not all returned to baseline  
9 levels). In studies enrolling subjects with dysbiosis at baseline (typically due to chronic  
10 diseases), it is not possible to show a restoration to normal microbiota levels because a normal,  
11 undisturbed microbiota was not present in these types of study subjects at the time of enrollment.  
12 Therefore, the strongest claim possible for Model B designs is for an 'alteration or improvement'  
13 of the microbiota. Only data from the probiotic-exposed subjects were analysed in this paper.  
14 Data from the control groups were used to confirm dysbiosis for subjects with chronic diseases  
15 or after a disruptive exposure, such as antibiotics or chemotherapy, unaffected by probiotic  
16 exposure.<sup>32-34</sup>  
17  
18  
19  
20  
21  
22  
23  
24  
25  
26  
27  
28  
29

### 30 **Assessment of methodological strength and quality**

31 The GRADE (Grading of Recommendations, Assessment, Development and Evaluation) system  
32 for rating overall study quality will be used for each probiotic strain or type (single strains and  
33 mixtures of strains).<sup>35</sup> Recommendation for the support of the claim of each probiotic strain or  
34 mixture can be assessed by the overall strength of the evidence ["strong", many randomized  
35 controlled trials show significant recovery of the microbiota, or "moderate" only one randomized  
36 controlled trial; or "weak", only case series or reports, limited number of small trials, *etc.*].  
37  
38  
39  
40  
41  
42  
43

44 Quality of the evidence is based on study design and graded as "high quality" (well-defined  
45 study design for determining restoration with normal microbiota, Model A), or "moderate  
46 quality" (disrupted microbiota at baseline, Model B), or "low quality" (no disruptive event  
47 occurred, Model C). Measurement of publication bias was not assessed for this review, as  
48 pooled outcome estimates of efficacy were not done, as typical in meta-analysis, but all studies  
49 with assays of microbiota were included to limit bias.  
50  
51  
52  
53  
54  
55

### 56 **Net efficacy rating**

1  
2  
3 To determine if the ability to correct dysbiosis is associated with clinical efficacy, the published  
4 literature for randomized controlled trials (RCTs) or meta-analyses of probiotics for various  
5 disease indications, including antibiotic associated diarrhea (AAD),<sup>5,36,37</sup> *Clostridium difficile*  
6 infection (CDI),<sup>5,38</sup> inflammatory bowel disease (IBD),<sup>39</sup> irritable bowel syndrome (IBS),<sup>40</sup>  
7 traveler's diarrhea (TD),<sup>41</sup> eradication of *Helicobacter pylori* (Hp),<sup>36,37</sup> bacterial vaginosis (BV)  
8 or vaginitis,<sup>42</sup> and treatment of acute pediatric diarrhea was reviewed.<sup>43-45</sup> The net rank was  
9 calculated by subtracting the number of RCTs showing non-significant or equivalent efficacy  
10 from the number of RCTs having significant efficacies. The ranks were categorized as follows:  
11 ++,  $\geq 2$  net RCTs showing significant efficacy; +, net of one RCT showing significant efficacy; 0,  
12 equal number of RCTs showing significant and non-significant efficacy results and -,  $\geq 1$  net  
13 negative or non-significant RCTs. Probiotics with no RCTs were not ranked.  
14  
15  
16  
17  
18  
19  
20  
21  
22  
23  
24

## 25 RESULTS

26  
27 A review of the literature from 1985-2013 found 353 articles that dealt with probiotic treatments  
28 and their potential effect on normal microbiota.  
29  
30  
31  
32

### 33 Excluded studies

34  
35 As shown in Figure 2, a total of 272 articles were excluded for the following reasons: reviews  
36 (n=116), probiotic efficacy studies with no data on normal microbiota assays (n=54), animal  
37 models of probiotics and changes in microbiota (n=38), metagenomic or microbiota methods  
38 only (n=17), studies on normal microbiota but with no use of probiotics (n=14), *in vitro* assays of  
39 microbiota (n=10), duplicative reports (n=2) or miscellaneous (n=21), which included probiotic  
40 mechanism of action studies, safety studies, duplicative reports, cross-sectional surveys and two  
41 with poorly described probiotic interventions.<sup>46,47</sup> A total of 81 full articles were reviewed which  
42 mentioned changes in normal microbiota or indicated a health claim for probiotics and effects on  
43 normal microbiota.  
44  
45  
46  
47  
48  
49  
50  
51

52 Probiotic pharmacokinetic studies (n=18) reporting concentrations of probiotic strains before and  
53 post-treatment, but did not assaying for other species of normal microbiota were excluded.  
54

55 While several studies using this study design claim probiotics had an impact on normal  
56  
57  
58  
59  
60

1  
2  
3 microbiota, type of data generated is pharmacokinetic behavior of the probiotics themselves and  
4 not the normal microbiota. Several studies stated that the normal microbiota was altered because  
5 an increase in various bacterial species was observed after the probiotics were given, but the  
6 species assayed were those contained in the probiotic product, so an increase is not unexpected.  
7 Pharmacokinetic studies have documented that probiotic strains taken orally can survive transit  
8 through the intestinal tract with recovery rates in feces ranging from <1% to 22%.<sup>48,49</sup> These  
9 pharmacokinetic studies were excluded from this analysis, as they did not assay other types of  
10 normal microbiota not found in the probiotic product.  
11  
12  
13  
14  
15  
16  
17  
18  
19

### 20 **Included studies**

21 Of the 63 included clinical trials, five trials had multiple treatment arms, which resulted in a total  
22 of 68 treatment arms for analysis. Engelbrekton et al. tested a mixture of 5 probiotic strains in  
23 volunteers exposed to antibiotics and also tested a mixture of 4 probiotic strains in healthy  
24 volunteers with no antibiotic exposure.<sup>50</sup> Zoppi et al. had eight different treatment arms in his  
25 study, and probiotic arms were included in our analysis [*Saccharomyces boulardii* (*S. boulardii*)  
26 alone and *Lactobacillus* (*L.*) *rhamnosus* GG alone], a mixture of two probiotics (*L. acidophilus*  
27 and *Bifido. bifidum*) and a mixture of three probiotic strains (*L. acidophilus*, *L. rhamnosus* and  
28 *Bifido. bifidum*).<sup>51</sup> Orrhage et al. had two treatment arms (*Bifido. longum* alone and a mixture of  
29 *Bifido. longum* and *L. acidophilus*).<sup>52</sup> Larsen et al. tested two single probiotics (*Bifido. lactis* and  
30 *L. acidophilus*) in separate treatment arms.<sup>53</sup> Lidbeck et al. gave either enoxacin or clindamycin  
31 and randomized patients to either *L. acidophilus* or placebo.<sup>54</sup>  
32  
33  
34  
35  
36  
37  
38  
39  
40  
41  
42  
43

44 **Normal microbiota assay methods.** Of the 69 treatment arms that did normal microbiota assays,  
45 diverse methods were used to profile the microbiota. Many studies used only standard  
46 microbiological culture assays (37, 54%), while others (28, 40%) used techniques to detect non-  
47 cultivatable bacterial strains, which included metagenomic assays (FISH, TRFLP, 16s rRNA  
48 sequencing) or other PCR techniques. Some studies (4, 6%) used an indirect measure of normal  
49 microbiota, using the Nugent score to diagnose bacterial vaginosis, which relies upon gram stain  
50 of the vaginal secretions, vaginal pH and symptoms to characterize if normal microbiota is  
51 present or absent.<sup>15</sup>  
52  
53  
54  
55  
56  
57  
58  
59  
60

1  
2  
3  
4  
5  
6 **Probiotic strains.** In the 69 treatment arms, most (36, 52%) used a single strain of probiotic,  
7 while 14 (20%) tested a mix of two probiotic strains and 19 (28%) tested a mix of three or more  
8 probiotic strains. The distribution of single versus multiple strain probiotics did not significant  
9 vary by the model of study design ( $\chi^2_2=2.3$ ,  $P=0.32$ ). Of the 15 restorative (Model A) study  
10 arms, 47% used a single strain of probiotic and 53% used multiple strains. Of the 25 treatment  
11 arms with disrupted microbiota at baseline (Model B), 44% used a single strain and 56% used  
12 multiple strains. Of the 29 study arms with undisturbed microbiota (Model C), 62% used a  
13 single strain and 38% used multiple strains.  
14  
15  
16  
17  
18  
19  
20  
21  
22

### 23 **Normal microbiota restoration model (Model A)**

24  
25 Only 10 studies (with 15 treatment arms) using Model A to determine restoration of the  
26 microbiota were found (Table 1).<sup>32,34,50-52,54-58</sup> The type of enrolled subjects varied from healthy  
27 volunteers to children with untreated respiratory infections, to pediatric cancer patients. For  
28 subjects with acute infections or cancer, baseline assays were done prior to the disrupting agent  
29 (antibiotics or chemotherapy). The number of subjects given probiotics averaged 20/study and  
30 ranged from 5 to 83. In 93%, the disruptive factor was antibiotic exposure and in one study,  
31 chemotherapy caused the microbiota disruption. Only 8 (53%) of the study arms did an assay  
32 during a 1-8 week follow-up period after the probiotic was discontinued.  
33  
34  
35  
36  
37  
38  
39  
40  
41  
42

43 Analysis of the probiotic strain(s) separately found only two probiotic products with more than  
44 one randomized controlled trial. The probiotic mix of *L. acidophilus* and *Bifido. bifidum* showed  
45 a complete restoration in one study, but only a partial recovery in the other. (Strength: strong,  
46 Quality: high). The probiotic mix of *L. acidophilus* (2 strains) with *Bifido. bifidum* and *Bifido.*  
47 *animalis* showed complete restoration in one study, but only a partial recovery in the other.  
48 (Strength: strong, Quality: high). Five other probiotic products with only one supporting clinical  
49 trial showed microbiota restoration (*Bifido. longum*, *Clostridium butyricum*, *L. acidophilus*, mix  
50 of *L. acidophilus* with *L. paracasei* and *Bifido. lactis*, and the mix of *L. acidophilus* with *L.*  
51 *paracasei* and *Bifido. bifidum* and two strains of *Bifido. lactis*). (Strength: moderate, Quality:  
52  
53  
54  
55  
56  
57  
58  
59  
60

1  
2  
3 high). Three probiotic products with one supporting clinical trial showed partial restoration (*S.*  
4 *boulevardii*, *L. rhamnosus* GG, mix of *L. rhamnosus* with *L. bifidus* and *L. acidophilus*), (Strength:  
5 moderate, Quality: high). Only two probiotic products using Model A showed no change in the  
6 microbiota (*Bifido. breve* and a mix of *L. acidophilus* and *Bifido. longum*). (Strength: moderate,  
7 Quality: high). In summary, 10 of 12 (83%) of the probiotic products showed complete or partial  
8 restoration of the normal microbiota.  
9  
10  
11  
12  
13

14  
15  
16  
17 Of the 11 probiotic products with claims of 'restores or improves normal microbiota', 10 (91%)  
18 were supported by this review, but only seven showed complete restoration and five had partial  
19 restoration of the microbiota (Table 1). The mixture of *L. acidophilus* and *Bifido. longum* did  
20 not show any changes in the microbiota. Wada et al. claimed *Bifido. breve* 'enhanced intestinal  
21 anaerobes', but this was only compared to the placebo group.<sup>32</sup> Their data showed chemotherapy  
22 is a disruptive event, resulting in more Enterobacteria in the intestine in the placebo group, but  
23 there were no significant differences seen by the end of the 8 week follow-up in either the  
24 probiotic or the placebo group compared to baseline microbiota levels.  
25  
26  
27  
28  
29  
30  
31  
32  
33  
34

### 35 **Disrupted normal microbiota at baseline studies (Model B)**

36  
37 Twenty-four studies (with 25 treatment arms) used Model B that enrolled subjects with a pre-  
38 existing disrupted microbiota related to ongoing disease or conditions (Table 2).<sup>33,53,59-80</sup> The  
39 number of subjects given probiotics averaged  $23 \pm 16$ /study and ranged from 7-83 participants.  
40 The types of pre-existing factors that disrupted the microbiota included atopic dermatitis  
41 patients, allergies, cirrhosis, bacterial vaginosis, irritable bowel syndrome, inflammatory bowel  
42 disease (ulcerative colitis and pouchitis), idiopathic diarrhea, enteral feeding, short-bowel  
43 syndrome and colon cancer. Only 10 (40%) of the study arms did an assay during the post-  
44 probiotic follow-up period.  
45  
46  
47  
48  
49  
50  
51  
52  
53  
54

55 Three of the probiotics had multiple clinical trials to support the claim of an improvement in the  
56 microbiota due to the probiotic. *S. boulevardii* was used in two trials either with enteral fed  
57  
58  
59  
60



1  
2  
3 patients or patients with active diarrhea and found an improvement in the habitual microbiota in  
4 the patients with active diarrhea<sup>66</sup>, but only showed indirect evidence of short-chain fatty acid  
5 changes in the other study.<sup>65</sup> (Strength: strong, Quality: moderate) A mix of four probiotic  
6 strains (2 strains of *L. rhamnosus*, *P. freudenreichii* + *Bifido. breve*) showed improved  
7 microbiota in two clinical trials.<sup>74,75</sup> (Strength: strong, Quality: moderate) Of four clinical trials  
8 testing a mixture of seven probiotic strains, two showed no significant change in microbiota<sup>77,78</sup>,  
9 one showed more anaerobes post-probiotic treatment<sup>79</sup> and one found a reduction in *Bacteroides*  
10 species.<sup>80</sup> (Strength: strong, Quality: moderate) Three clinical trials determined there were no  
11 significant changes due to *L. plantarum* 299v.<sup>62-64</sup> (Strength: strong, Quality: moderate). Of those  
12 probiotics with only one supporting clinical trial (Strength: moderate, Quality: moderate), two  
13 single probiotic strains (*E. coli* Nissle and *L. casei rhamnosus*) and five different mixtures of  
14 probiotic strains support the claim that the probiotic alters the microbiota (Table 2). In summary,  
15 10 of 18 (56%) probiotic products altered or improved microbiota in individuals with pre-  
16 existing disease.  
17  
18  
19  
20  
21  
22  
23  
24  
25  
26  
27  
28  
29  
30  
31

32 Of the 25 treatment arms, the paper's claim was confirmed in 14 (56%) of the studies. There was  
33 no significant change in the microbiota due to the probiotic in nine treatment arms and only an  
34 alteration of the microbiota in five others (Table 2). Our review disagreed with the claimed  
35 outcomes in 11 (46%) of the other treatment arms. In seven treatment arms, it was claimed the  
36 tested probiotic 'restored normal microbiota', but it is uncertain how this conclusion was reached,  
37 since there was no time when a normal undisrupted microbiota was present. Of the seven studies  
38 that claimed their probiotic 'restored' normal microbiota, our analysis determined none were  
39 capable of documenting restoration, but it is confirmed probiotics improved or altered the  
40 microbiota in these studies. Four studies claimed the probiotic 'altered or improved' normal  
41 microbiota, but this review found no significant differences when post-probiotic and baseline  
42 assays were compared for the probiotic groups. Girard-Pipau et al. concluded that *S. boulardii*  
43 'altered normal flora' because more gram positive anaerobes were seen in the probiotic group  
44 compared to the controls and an increase in three short-chain fatty acids were observed in the *S.*  
45 *boulardii* group.<sup>65</sup> However, when the analysis is restricted to trends observed in the probiotic  
46 group only, no significant differences were observed in pre-probiotic versus post-probiotic  
47  
48  
49  
50  
51  
52  
53  
54  
55  
56  
57  
58  
59  
60

1  
2  
3 microbiota profiles. Venturi et al. concluded that the mix of seven probiotic strains enhanced the  
4 concentration of some beneficial strains in the intestines.<sup>77</sup> However, the only strains having a  
5 significant increase were those contained in the probiotic mix, and not specifically normal  
6 microbiota of the host. As this study did not have an undisturbed microbiota baseline, the  
7 increased numbers of Lactobacilli and Bifidobacteria may not have reflected their normal levels.  
8 Van der Aa et al. claimed that *Bifido. breve* 'successfully modulates the intestinal flora', but no  
9 significant changes were observed in the probiotic group when comparing the baseline to the  
10 post-probiotic levels.<sup>59</sup> Odamaki et al. did show an increase in Faecalibacterium ssp. and  
11 *Bacteroides fragilis* ssp. at the end of *Bifido. longum* BB536 treatment, but the same increase  
12 was also observed in the placebo group.<sup>33</sup>  
13  
14  
15  
16  
17  
18  
19  
20  
21  
22  
23

### 24 **Undisrupted normal microbiota studies (Model C)**

25  
26  
27 Twenty nine trials enrolled healthy adults who had no disruptive factor present during the study  
28 (either no antibiotic or no medication exposure or presence of acute or chronic disease) that  
29 might impact normal microbiota, as shown in Table 3.<sup>14,49,50,81-106</sup> The average number of  
30 subjects given probiotics was 23/study and ranged from 7 to 160/study. Of the 29 study arms,  
31 assays were taken during a follow-up period in only 52%. Fujiwara et al. cultured seven healthy  
32 volunteers and found Enterobacteriaceae and Clostridial species post-*Bifido. longum* was  
33 reduced by 10<sup>1</sup>/g compared to baseline (P<0.03), but no other changes in the microbiota were  
34 detected.<sup>84</sup> Karlsson et al. found a significant increase in intestinal diversity in nine male  
35 volunteers with atherosclerosis given *L. plantarum* 299v, but because terminal restriction  
36 fragment length polymorphism assays were used instead of cultures for bacterial species, the  
37 specific changes in the microbiota species could not be determined.<sup>94</sup> Yang and Sheu cultured 63  
38 children (55% with *H. pylori*) given a yogurt with *L. acidophilus* and *Bifido. lactis* but only  
39 found a decrease in *E. coli* counts in the *H. pylori* negative children sub-group, no significant  
40 changes in normal microbiota was found in the *H. pylori* positive children.<sup>100</sup> Kubota et al.  
41 assayed 29 subjects with Japanese cedar pollen allergy and found milk fermented with *L.*  
42 *rhamnosus* GG and *L. gasseri* TMC0356 suppressed microbiota changes (less intestinal profile  
43 changes), but could not determine specific bacterial species changes due to the type of assay used  
44  
45  
46  
47  
48  
49  
50  
51  
52  
53  
54  
55  
56  
57  
58  
59  
60

1  
2  
3 (FISH and TRFLP).<sup>103</sup> In summary, only 4 of 19 (21%) probiotic products altered microbiota in  
4 healthy individuals who had no disruptive event.  
5  
6  
7  
8  
9

10 Of the seven studies that claimed their probiotic(s) 'restored or altered' the normal microbiota,  
11 only four claims were confirmed. Sierra et al. claimed *L. salivarius* given to 20 healthy adults  
12 'improved gut microbiota', but only increased levels of Lactobacilli were found and no other  
13 changes in normal microbiota species were detected. The only other evidence was indirect from  
14 changes observed in immune parameters.<sup>96</sup> He et al. claimed a mixture of *Bifido. longum* and  
15 *Bifido. animalis* 'modified' microbiota, but changes were seen only during the yogurt  
16 administration and not after the one week follow-up period.<sup>99</sup> Vitali et al. claimed that the  
17 mixture of four Lactobacilli strains and three Bifidobacteria strains 'modulated vaginal  
18 microbiota', but the only significant changes were due to an increase in the bacterial species  
19 contained in the probiotic mixture.<sup>14</sup>  
20  
21  
22  
23  
24  
25  
26  
27  
28  
29  
30

31 Of the probiotics supported by multiple clinical trials (*Bifido. animalis*, *Bifido. longum*, *L. casei*,  
32 *L. plantarum* 299v, the mixture of *Bifido. animalis* and *Bifido. lactis*), 13 of the trials (87%)  
33 support there is no significant change in normal microbiota if the microbiota is not disrupted.  
34 [Strength: strong, Quality: low]  
35  
36  
37  
38  
39  
40  
41

#### 42 **Association of clinical efficacy and normal microbiota restoration**

43  
44 Few studies concurrently compared clinical efficacy and the ability to restore or improve normal  
45 microbiota after dysbiosis. A synthesis of the literature of RCT for eight common disease  
46 indications was performed and the overall net strength was ranked. Probiotics with the ability to  
47 restore normal microbiota were frequently supported by RCTs for efficacy, as shown in Table 4.  
48 Of the 10 probiotics with evidence for restoration, 7 (70%) also had at least one RCT testing for  
49 at least one of the eight diseases, while 30% did not have any supportive RCTs for efficacy. Of  
50 the 7 probiotics with associated RCTs, only two probiotics (*S. boulardii* and *L. acidophilus*) have  
51 strong evidence for efficacy across most of the disease indications, while five probiotics with the  
52  
53  
54  
55  
56  
57  
58  
59  
60

1  
2  
3  
4 ability to restore the microbiota had weak or no evidence of efficacy. For example, *S. boulardii*,  
5 which has studies supporting restoration, has strong evidence for clinical efficacy for AAD  
6 (ranked ++: 11 RCTs had significant results and 6 had non-significant results), CDI (ranked ++:  
7 had two RCTs with significant results), IBD (ranked ++: had two RCTs with significant results),  
8 IBS (ranked 0: had one RCT with significant efficacy and one RCT with non-significant results),  
9 TD (ranked +: 3 RCTs with significant efficacy and 2 with non-significant efficacy), *H. pylori*  
10 eradication (ranked -: 2 RCTs with significant results and 4 with non-significant results) and no  
11 studies for BV. *L. acidophilus*, which partially restored the microbiota in a study, is associated  
12 with clinical efficacy for AAD, IBS and BV, but not for TD or eradication of *H. pylori* and  
13 treatment of acute pediatric diarrhea (ranked ++: had 19 RCTs with significant protection and  
14 five with non-significant results). In contrast, *L. rhamnosus GG*, another probiotic capable of  
15 restoring microbiota, is often cited in meta-analysis as having significant efficacy for AAD. Our  
16 results of an updated review of the literature indicate a net weak evidence rating for clinical  
17 efficacy across all disease indications: AAD (ranked -: 3 RCTs had significant results and 6 had  
18 non-significant results), CDI (ranked -: two RCTs with non-significant results), IBD (ranked -:  
19 one RCT with non-significant results), IBS (ranked 0: 2 RCTs with significant efficacy and two  
20 RCTs with non-significant results), TD (ranked 0: one RCT with significant efficacy and one  
21 with non-significant efficacy), *H. pylori* eradication (ranked -: 3 RCTs with non-significant  
22 results), no RCTs for BV and treatment of acute pediatric diarrhea (ranked ++: 10 RCTs with  
23 significant efficacy and one with non-significant findings).  
24  
25  
26  
27  
28  
29  
30  
31  
32  
33  
34  
35  
36  
37  
38  
39  
40  
41

42 Efficacy trials were not done as frequently for probiotics shown to only have the ability to alter  
43 or improve, but not restore, the microbiota after dysbiosis. Of nine probiotics that can alter the  
44 microbiota, 6 (67%) have supporting RCTs for at least one disease, but the diversity of  
45 investigated diseases was more limited. *L. casei* had moderate net strength for AAD and  
46 bacterial vaginosis, but was neutral for the ability to eradicate *H. pylori* and other disease  
47 indications were not tested in RCTs with *L. casei*. The probiotic mixture of *L. reuteri* and *L.*  
48 *fermentum* has strong evidence for bacterial vaginosis, but not for any other disease indications  
49 listed in Table 4.  
50  
51  
52  
53  
54  
55  
56  
57  
58  
59  
60

1  
2  
3 Of the eight probiotics not capable of altering or restoring normal microbiota, only *L. plantarum*  
4 299v had RCTs for AAD and IBS, both with net negative or weak strength of clinical efficacy.  
5  
6 *Bifido. lactis* and the mixture of *L. rhamnosus* and *L. reuteri* had net neutral rankings for efficacy  
7  
8 for the treatment of acute pediatric diarrhea. The other four probiotic products with no effect on  
9  
10 normal microbiota lacked any RCTs for clinical efficacy. Studies with *B. clausii* did not assay  
11  
12 for normal microbiota and had non-significant trial results for *H. pylori* eradication and the  
13  
14 treatment of pediatric diarrhea.

15  
16  
17 Of the six probiotics with only pharmacokinetic data on the probiotic itself and no other  
18  
19 investigation of other normal microbiota strains, five had RCTs showing varying net efficacies  
20  
21 for different disease indications, as shown in Table 4.

22  
23  
24 Six popular probiotics (*Bacillus clausii*, *Bifido. infantis*, *L. reuteri*, *L. acidophilus* + *L. helveticus*,  
25  
26 *L. acidophilus* + *L. casei* and *L. acidophilus* + *Bifido. animalis*) have only clinical efficacy  
27  
28 RCTs, but have not published studies investigating their role in restoring or improving the  
29  
30 normal microbiota.

### 31 32 33 34 **Discussion**

35  
36 Developing and evaluating health or function claims for probiotics is an important issue and is  
37  
38 now identified as a priority for research by several international organizations, including the  
39  
40 World Gastroenterology Organization<sup>107</sup> and the American Society for Nutrition.<sup>2</sup> The U.S. Food  
41  
42 and Drug Administration has struggled with appropriate evidence-based health claims for  
43  
44 probiotic products and currently recommends the use of structure/function claims, such as  
45  
46 "maintains bowel regularity", but the claim for restoring normal microbiota is still under  
47  
48 debate.<sup>108</sup> The European Food Safety Authority (EFSA) provides guidance materials that  
49  
50 recommend health or function claims for probiotics should have beneficial physiological effects  
51  
52 and have appropriate scientific trials to substantiate the health claims.<sup>3</sup> Acceptable claims for  
53  
54 intestinal health may include functional claims (improved transit time, softer stool consistency,  
55  
56 reduction in gastrointestinal discomfort, defense against pathogens). As it is currently not  
57  
58 possible to define a standard normal microbiota profile, the EFSA recommends functional claims  
59  
60

1  
2  
3 for the restoration of normal microbiota should document a recovery of healthy microbiota and  
4 be accompanied by a beneficial physiological or clinical outcome.<sup>3</sup> In addition, because the  
5 efficacy and mechanisms are strain-specific and may vary by probiotic strain, the evidence must  
6  
7 be analyzed for each probiotic product individually.<sup>5,6,9,109, 110-112</sup>  
8  
9

10  
11  
12 An underappreciated finding was the influence that study design and study populations have on  
13 the interpretation of study outcomes. In the literature, five different types of study designs are  
14 commonly found relating to probiotics. The most common study type is a randomized controlled  
15 trial testing the efficacy and safety outcomes in patients, but these trials did not typically  
16 document the impact of the probiotic on the normal microbiota. The second most common type  
17 of study design is pharmacokinetic studies (documenting recovery of oral dose of probiotic or  
18 increase in probiotic strains post-treatment compared to pre-treatment or clearance of the  
19 probiotic). Even though these kinetic studies did not assay for non-probiotic strains, some  
20 extrapolated their results and concluded some effect or improvement of the normal microbiota  
21 was observed by their probiotic.<sup>19,111</sup> These two first types of study designs do not support  
22 evidence-based conclusions for the restoration or alteration of the normal microbiota and were  
23 excluded from this review.  
24  
25  
26  
27  
28  
29  
30  
31  
32  
33

34 Three types of study designs are appropriate for the study of dysbiosis. The first type of study  
35 design had normal microbiota assayed at least twice (at baseline, which was before exposure to a  
36 disruptive event or probiotics and then again during or post-probiotic treatment) to show actual  
37 recovery of assayed normal microbiota back to healthy baseline levels. The second type of study  
38 design started with inappropriate baselines (baseline samples taken after normal microbiota had  
39 been disrupted by chronic disease). For patients with established chronic diseases, there is no  
40 “normal microbiota” baseline in either the probiotic or the control group. Even if baselines are  
41 taken during remission, the microbiota may still be impacted by chronic disease or acute  
42 diarrhea. Studies of probiotics in chronic diseases or acute disease typically report on ‘pre-  
43 probiotic treatment’ and ‘post-probiotic treatment’ and may show significant shifts in microbial  
44 species, but it is uncertain if this reflects a true re-establishment of normal microbiota profiles.  
45  
46 The third type of study design enrolled healthy volunteers, who were not challenged with  
47 antibiotics (so no normal microbiota disruption occurred), and show only the effect of probiotics  
48 on a healthy microbiota (typically mild or no effects). Control groups were not required for our  
49  
50  
51  
52  
53  
54  
55  
56  
57  
58  
59  
60

1  
2  
3 assessment of the impact of probiotics on microbiota, but control groups can document the  
4 degree normal microbiota is disrupted by inciting agents (antibiotic, disease onset, etc.).  
5  
6  
7  
8  
9

10 Five single strain probiotics (*Bifido. longum*, *Clost. butyricum*, *L. acidophilus*, *L. rhamnosus* and  
11 *S. boulardii*) and five probiotic mixtures [(*L. acidophilus* + *Bifido. bifidum*), (*L. rhamnosus* + *L.*  
12 *bifidus* + *L. acidophilus*), (*L. acidophilus* + *L. paracasei* + *Bifido. lactis*), (*L. acidophilus*, 2  
13 strains, *Bifido. bifidum*, *Bifido. animalis*) and (*L. acidophilus* + *L. paracasei* + *Bifido. bifidum*  
14 + 2 strains of *Bifido. lactis*)] documented either complete or partial recovery of normal  
15 microbiota (Model A). Only two probiotic mixtures [(2 strain mixture: *L. acidophilus* + *Bifido.*  
16 *bifidum*) and (4 strain mixture: *L. acidophilus*, 2 strains, *Bifido. bifidum*, *Bifido. animalis*)] were  
17 supported by a confirmatory study. Evidence that probiotics may alter or improve normal  
18 microbiota (Model B) was found for three single strain probiotics (*E. coli* Nissle, *S. boulardii*  
19 and *L. casei rhamnosus*) and seven mixtures of 2-7 probiotic strains. Of these ten probiotics  
20 finding alteration of the microbiota, only three had multiple trials [*S. boulardii*, and a four strain  
21 mixture (2 strains of *L. rhamnosus* + *P. freudenreichii* + *Bifido. breve*), and a seven strain  
22 mixture (4 Lactobacilli and 3 Bifidobacteria strains)], but only one had consistent results  
23 showing improvements in the microbiota.<sup>74,75</sup> Clearly, more than one study is needed to confirm  
24 the impact of a probiotic on the normal microbiota. Of the 19 probiotic strains (or mixtures)  
25 studied in healthy volunteers who were not exposed to disruptive factors (Model C), no change  
26 in the normal microbiota was observed for 79%, indicating the robustness of the microbiota.  
27  
28  
29  
30  
31  
32  
33  
34  
35  
36  
37  
38  
39  
40  
41  
42  
43

44 Improvement in the normal microbiota by specific probiotic strains seemed to be associated with  
45 better clinical endpoints. Within eight common diseases typically treated with probiotics, more  
46 trials with significant efficacy were associated with probiotic strains shown to restore the normal  
47 microbiota, and only one trial with significant efficacy was found for probiotics that did not alter  
48 the microbiota. However, few probiotics had efficacy trials for all eight diseases and many did  
49 not have any efficacy trials.  
50  
51  
52  
53  
54  
55  
56  
57  
58  
59  
60

1  
2  
3  
4  
5  
6  
7  
8  
9  
10  
11  
12  
13  
14  
15  
16  
17  
18  
19  
20  
21  
22  
23  
24  
25  
26  
27  
28  
29  
30  
31  
32  
33  
34  
35  
36  
37  
38  
39  
40  
41  
42  
43  
44  
45  
46  
47  
48  
49  
50  
51  
52  
53  
54  
55  
56  
57  
58  
59  
60

Some probiotics which have published efficacy trials for various diseases did not have studies investigating the effect of the probiotic on normal microbiota: *Bacillus clausii*, *Bifido. infantis*, *L. brevis*, *L. reuteri*, mix of 2 strains (*L. acidophilus* + *L. helveticus*), mix of 2 strains (*L. acidophilus* + *L. casei*) or (*L. acidophilus* + *Bifido. animalis*), mix of 4 strains [*L. rhamnosus* (2 strains), *Propionibacterium freudenreichii* + *Bifido. animalis*] and mix of 7 strains (*L. sporogens*, *L. bifidum*, *L. bulgaricus*, *L. thermophilus*, *L. acidophilus*, *L. casei*, *L. rhamnosus*).

### Comparison of results with other studies

Other reviews in the literature of claims for probiotics relating to changes in the normal microbiota have focused on the broad issues of regulatory standardization of health or function claims, the use of proper study designs and the challenge of defining biomarkers for a 'healthy microbiota'.<sup>3,29,112</sup> Donovan et al. recommends that health claims for probiotics be supported by well-conducted human trials in the targeted population.<sup>2</sup> These reviews also recommend that gut biomarkers need to be correlated with clinical endpoints, however none of these reviews attempted to do so.<sup>29,112</sup> No prior review has attempted to analyze the association between probiotic strains and their impact on normal microbiota by stratifying on the quality of study design.<sup>111</sup> This review addressed these concerns by analyzing probiotic strains by the quality of the study design and only including trials that assessed the normal microbiota (either by microbial culturing or molecular strain biomarkers) and assessed the degree of dysbiosis improvement with clinical outcomes for each probiotic strain.

### Opportunities for future research

Most of the studies (80%) using Model A to document restoration of the normal microbiota only used microbiologic culturing techniques, which can only detect those organisms that grow in culture. Use of the more advanced molecular metagenomic techniques have found that culturing alone misses up to 95% of these organisms.<sup>21,22</sup> The use of the metagenomic techniques was more common in the studies using Model B (48%) and Model C (45%) study designs, which only addresses potential alteration of the microbiota. Characterization of the microbiota is a



1  
2  
3 complex issue and a comprehensive accounting of all the bacterial and fungal strains in the body  
4 is beyond our current capabilities. Therefore, any studies of changes to the microbiota are  
5 incomplete at best, but general trends in bacterial phylotypes can be documented using DNA  
6 probes and metagenomic techniques. Differential detection bias may be present due to the  
7 variety of assays used in these studies and should be accounted for in future studies.  
8  
9  
10  
11

12  
13  
14  
15  
16 Another suggestion for future studies is to include an appropriate follow-up time period post-  
17 probiotic administration. Fewer than half of the reviewed trials did assays for normal microbiota  
18 during an appropriate follow-up period. As it has been shown that recovery from a disrupting  
19 factor can be prolonged (typically eight weeks),<sup>7,8</sup> and studies that failed to find microbiota  
20 recovery might have detected a return to normal baseline levels if a sufficiently long time was  
21 given for the recovery to have occurred. Future studies should strive to allow time for the  
22 restoration of the normal microbiota to occur.  
23  
24  
25  
26  
27  
28

29  
30  
31 As the effects of probiotics are strain specific, and many studies typically only report the genus  
32 and species of the tested probiotic, future reports should include a complete description of the  
33 probiotic to the strain level.<sup>5,112</sup>  
34  
35  
36  
37  
38  
39

### 40 **Strengths and weaknesses**

41  
42 The strengths of this review included the completeness of the search strategy, which reviewed  
43 multiple citation databases, trial registries and author searches, use of established PRISMA  
44 protocols for reviews and the use of an outcome classification scheme for different degrees of  
45 assessment for microbial recovery. This analysis controlled the confounding effects of different  
46 study populations and study designs present in the literature. Pharmacokinetic studies of just the  
47 probiotic strain(s) itself were excluded and only trials that assayed other species found in the  
48 microbiota were included. By applying a standard definition for 'restoring' versus 'improving'  
49 normal microbiota, it is possible to distinguish significant differences by the type of study  
50 designs used and differential effects of the different probiotic strains. Limitations of this review  
51  
52  
53  
54  
55  
56  
57  
58  
59  
60

1  
2  
3 include: a single author reviewed and extracted the literature, pooling trials from different  
4 populations (adult versus pediatric) and different probiotic doses and regimens used. Incomplete  
5 retrieval of all studies assessing the effect that probiotics have on human microbiota is also a  
6 potential limitation of any literature search. Another limitation is that dysbiosis improvement and  
7 clinical efficacy for probiotic strains is also indirectly associated, no direct cause and effect  
8 relationship was possible with the types of studies done. Another limitation is the current lack of  
9 a standard definition of what comprises a 'normal microbiota'. The constituents of the  
10 microbiota vary by individual, by age, geographic location and health status of the host. Current  
11 microbiologic techniques are improving, but can not detect all species present in the host.  
12  
13  
14  
15  
16  
17  
18  
19  
20  
21

## 22 **Conclusion**

23  
24 The challenges in recommending a specific probiotic to patients who need to restore or improve  
25 their normal microbiota after a disrupting event occurs is two-fold: one is the diversity of  
26 probiotic products available and second is the varying strength of evidence provided by clinical  
27 trials using different outcome measures and study designs. By grouping studies into three groups  
28 that result in three different degrees of probiotic effect (restoration, improvement or no change),  
29 an overview of the body of evidence is possible. By comparing the strength of the clinical  
30 evidence for common diseases by the degree to which the probiotics could impact the restoration  
31 of the normal microbiota, it became obvious that those probiotics with a greater ability to restore  
32 the microbiota are associated with the strongest strength of clinical efficacy. While this evidence  
33 only indirectly links clinical efficacy with the ability to restore the microbiota, the overall review  
34 of the evidence shows this is an important mechanism of action for probiotics. What becomes  
35 obvious is that more studies are required to conclude which probiotic strains have a beneficial  
36 impact on the normal microbiota, as most strains have only a single clinical trial and many  
37 probiotic products overstate the strength of their claim to restore normal microbiota. These types  
38 of issues should be considered for health care policy makers and researchers for future studies  
39 and for creating guidelines for health/function claims.  
40  
41  
42  
43  
44  
45  
46  
47  
48  
49  
50  
51  
52  
53  
54  
55  
56  
57  
58  
59  
60

**Table 1. Model A:** Evidence-based data for restoration of normal microbiota (NM) for 12 probiotics from 10 studies (15 treatment arms).

| Probiotic*                                                                                                                                       | Reference                                                | No. treated with probiotic | Type of assay for NM | Enrolled population                    | Type of disrupting factor    | Follow-up post-treatment (wks) | Claims stated in papers   | Evidence-based claim       |
|--------------------------------------------------------------------------------------------------------------------------------------------------|----------------------------------------------------------|----------------------------|----------------------|----------------------------------------|------------------------------|--------------------------------|---------------------------|----------------------------|
| <i>Bifido. breve</i>                                                                                                                             | Wada 2010 <sup>32</sup>                                  | 19                         | FISH                 | pediatric cancer patients              | chemotherapy                 | 8                              | enhances anaerobes        | no change                  |
| <i>Bifido. longum</i> BB536                                                                                                                      | Orrhage 1994 <sup>52</sup>                               | 10                         | culture              | healthy volunteers                     | clindamycin                  | 0                              | restores                  | restores                   |
| <i>Clost. butyricum</i> MIYAIRI                                                                                                                  | Seki 2003 <sup>34</sup>                                  | 83                         | culture              | pediatric respiratory or GI infections | antibiotics                  | 0                              | restores                  | restores                   |
| <i>L. acidophilus</i> NCFB1748                                                                                                                   | Lidbeck 1988 <sup>54</sup>                               | 5                          | culture              | healthy volunteers                     | enoxacin or                  | 1                              | restores only in enoxacin | restores only in enoxacin, |
|                                                                                                                                                  |                                                          | 5                          | culture              | volunteers                             | clindamycin                  | 1                              | no change                 | no change in clindamycin   |
| <i>L. rhamnosus</i> GG                                                                                                                           | Zoppi 2001 <sup>51</sup>                                 | 7                          | culture              | pediatric respiratory infections       | ceftriaxone                  | 0                              | partially corrects        | partially restores         |
| <i>S. boulardii</i> lyo                                                                                                                          | Zoppi 2001 <sup>51</sup>                                 | 6                          | culture              | pediatric respiratory infections       | ceftriaxone                  | 0                              | improves                  | partially restores         |
| <i>L. acidophilus</i> + <i>Bifido. bifidum</i>                                                                                                   | Black 1991, <sup>55</sup><br>Zoppi 2001 <sup>51</sup>    | 10,                        | culture,             | healthy volunteers,                    | ampicillin,                  | 2,                             | recovers more rapidly,    | restores,                  |
|                                                                                                                                                  |                                                          | 7                          | culture              | pediatric respiratory                  | ceftriaxone                  | 0                              | less change               | partially restores         |
| <i>L. acidophilus</i> 1748 + <i>Bifido. longum</i> BB536                                                                                         | Orrhage 1994 <sup>52</sup>                               | 10                         | culture              | healthy volunteers                     | clindamycin                  | 0                              | no change                 | no change                  |
| <i>L. rhamnosus</i> + <i>L. bifidus</i> + <i>L. acidophilus</i>                                                                                  | Zoppi 2001 <sup>51</sup>                                 | 7                          | culture              | pediatric respiratory infections       | ceftriaxone                  | 0                              | partially corrects        | partially restores         |
| <i>L. acidophilus</i> 1748 + <i>L. paracasei</i> F19 + <i>Bifido lactis</i> Bb12                                                                 | Jernberg 2005 <sup>56</sup>                              | 4                          | culture PCR TRFLP    | healthy volunteers                     | clindamycin                  | 2                              | restores                  | restores                   |
| <i>L. acidophilus</i> CUL60+ <i>L. acidophilus</i> CUL21 + <i>Bifido. bifidum</i> CUL17 + <i>Bifido animalis lactis</i>                          | Madden 2005, <sup>57</sup><br>Plummer 2005 <sup>58</sup> | 15,                        | culture,             | <i>H. pylori</i> +,                    | amoxicillin + metronidazole, | 2,                             | restores,                 | restores,                  |
|                                                                                                                                                  |                                                          | 76                         | culture              | <i>H. pylori</i> +                     | amoxicillin + clarithromycin | 2                              | restores more rapidly     | partially restores         |
| <i>L. acidophilus</i> NCFM + <i>L. paracasei</i> Lpc-37 + <i>Bifido. bifidum</i> Bb02+ <i>Bifido. lactis</i> Bi-04 + <i>Bifido. lactis</i> Bi-07 | Engelbrektsen 2006 <sup>50</sup>                         | 20                         | culture PCR TRFLP    | healthy volunteers                     | augmentin                    | 2                              | restores                  | restores                   |

\*including strain (when reported)

**Table 2. Model B:** Evidence-based data for improvement or alteration of normal microbiota (NM) in 18 probiotics from 24 studies (25 treatment arms) with disturbed microbiota at baseline.

| Probiotic*                                                               | Reference                       | No. treated with probiotic | Type(s) of assay for NM   | Pre-existing disrupting factor** | Follow-up time | Claims stated in papers | Evidence-based claim | Type of change found in NM                 |
|--------------------------------------------------------------------------|---------------------------------|----------------------------|---------------------------|----------------------------------|----------------|-------------------------|----------------------|--------------------------------------------|
| <i>Bifido. breve</i> M-16V                                               | Van der Aa 2010 <sup>59</sup>   | 46                         | FISH                      | Atopic dermatitis                | 0              | modulates NF            | no change            | --                                         |
| <i>Bifido. lactis</i> Bi-07                                              | Larsen 2011 <sup>53</sup>       | 17                         | PCR                       | Atopic dermatitis                | 0              | no change               | no change            | --                                         |
| <i>Bifido. longum</i> BB536                                              | Odamaki 2007 <sup>33</sup>      | 22                         | TRFLP PCR                 | Cedar pollen allergy             | 4 wk           | maintains NF            | no change            | --                                         |
| <i>E. coli</i> Nissle                                                    | Lata 2007 <sup>60</sup>         | 22                         | culture                   | liver cirrhosis                  | 0              | restores                | improves             | more <i>Bifido.</i> & <i>Lacto.</i>        |
| <i>L. acidophilus</i> 700396                                             | Larsen 2011 <sup>53</sup>       | 17                         | PCR                       | atopic dermatitis                | 0              | no change               | no change            | --                                         |
| <i>L. casei rhamnosus</i> Lcr35                                          | Petricevic 2008 <sup>61</sup>   | 83                         | Nugent scores             | bacterial vaginosis              | 4 wk           | restores                | improves             | improved Nugent scores                     |
| <i>L. plantarum</i> 299v                                                 | Nobaek 2000, <sup>62</sup>      | 25,                        | culture,                  | IBS,                             | 4 wk,          | no change,              | no change,           | --                                         |
|                                                                          | Klarin 2005, <sup>63</sup>      | 17,                        | culture,                  | enterally-fed,                   | 0,             | no change,              | no change,           |                                            |
|                                                                          | Klarin 2008 <sup>64</sup>       | 22                         | culture                   | antibiotics                      | 0              | no change               | no change            |                                            |
| <i>S. boulardii</i> Iyo                                                  | Girard 2002, <sup>65</sup>      | 10,                        | culture,                  | enterally-fed,                   | 9 d,           | alters NF,              | no change,           | --                                         |
|                                                                          | Swidsinski 2008 <sup>66</sup>   | 20                         | FISH                      | active diarrhea                  | 3 wk           | improves                | improves             | more 'habitual microbiota'                 |
| <i>L. rhamnosus</i> GR-1 + <i>L. fermentum</i> RC14                      | Reid 2001 <sup>67</sup>         | 33                         | Nugent scores             | bacterial vaginosis              | 2 wk           | restores                | improves             | improved Nugent scores                     |
| <i>L. rhamnosus</i> GR-1 + <i>L. fermentum</i> RC14                      | Reid 2003 <sup>68</sup>         | 31                         | Nugent scores and culture | bacterial vaginosis              | 30 d           | restores                | improves             | improved Nugent scores                     |
| <i>L. plantarum</i> 8PA3 + <i>Bifido bifidum</i>                         | Kirpich 2008 <sup>69</sup>      | 32                         | culture                   | colon cancer                     | 0              | restores                | improves             | more <i>E. coli</i> and <i>Enterococci</i> |
| <i>L. rhamnosus</i> GR1 + <i>L. reuteri</i> RC14                         | Hummelen 2010 <sup>70</sup>     | 23                         | Nugent score              | bacterial vaginosis              | 0              | no change               | no change            | --                                         |
| <i>L. casei</i> Shirota+ <i>Bifido breve</i> BBG01                       | Uchida 2007 <sup>71</sup>       | 4                          | culture                   | short bowel syndrome             | 0              | no change               | no change            | --                                         |
| <i>L. brevis</i> CD2 + <i>L. salivaris</i> FV2 + <i>L. plantarum</i> FV9 | Mastromarino 2009 <sup>72</sup> | 19                         | Nugent score              | bacterial vaginosis              | 2 wk           | restores                | improves             | improved Nugent scores                     |

|                                                                                                                                                                                           |                              |     |               |                     |       |                  |            |                                     |
|-------------------------------------------------------------------------------------------------------------------------------------------------------------------------------------------|------------------------------|-----|---------------|---------------------|-------|------------------|------------|-------------------------------------|
| <i>L. paracasei</i> Lpc37+ <i>L. acidophilus</i> 74-2 + <i>Bifido. animalis</i> DGCC420                                                                                                   | Roessler 2012 <sup>73</sup>  | 30  | PCR           | atopic dermatitis   | 0     | no change        | no change  | --                                  |
| <i>L. rhamnosus</i> GG + <i>L. rhamnosus</i> Lc705 + <i>P. freudenreichii</i> shermanii JS + <i>Bifido. breve</i> Bb99                                                                    | Kajander 2005, <sup>74</sup> | 41, | PCR,          | IBS,                | 0,    | restores,        | improves,  | Improved similarity index           |
|                                                                                                                                                                                           | Lyra 2010 <sup>75</sup>      | 22  | PCR           | IBS                 | 0     | alters           | alters     | More Clostridia and Rumino-coccus   |
| <i>L. acidophilus</i> 4356 + <i>L. plantarum</i> 14917 + <i>L. rhamnosus</i> 7469 + <i>Bifido. bifidum</i> 2952                                                                           | Wong 2013 <sup>76</sup>      | 7   | PCR           | liver disease       | 0     | improves         | alters     | Less Firmicutes, more Bacteroidetes |
| <i>L. acidophilus</i> + <i>L. paracasei</i> + <i>L. delbrueckii</i> ssp. <i>bulgaricus</i> + <i>L. plantarum</i> + <i>Bifido. longum</i> + <i>Bifido. infantis</i> + <i>Bifido. breve</i> | Venturi 1999, <sup>77</sup>  | 20, | culture       | ulcerative colitis, | 15 d, | enhances,        | no change, | --                                  |
|                                                                                                                                                                                           | Brigidi 2001, <sup>78</sup>  | 10, | culture & PCR | IBS,                | 10 d, | no change,       | no change, | --                                  |
|                                                                                                                                                                                           | Kuhbacher 2006 <sup>79</sup> | 10  | FISH          | pouchitis           | 0     | altered richness | altered    | More anaerobes                      |
|                                                                                                                                                                                           | Ng 2013 <sup>80</sup>        | 10  | PCR           | IBS                 | 0     | modulates        | altered    | Less Bacteroides                    |

\*including strain (when reported)

\*\*disruption of normal microbiota at baseline shown by significant differences compared to control (non-diseased) population.

**Table 3. Model C:** Evidence-based data for improvement or alteration of normal microbiota (NM) in 19 probiotics in healthy volunteers enrolled in 29 studies (29 treatment arms) in studies with no disruptive exposures.

| Probiotic                                            | Reference                                                                                                                                       | No. treated with probiotic | Type of assay for NM             | Enrolled population                                        | Type of disrupting factor    | Follow-up post-treatment | Claims stated in papers                            | Evidence-based claim                               |
|------------------------------------------------------|-------------------------------------------------------------------------------------------------------------------------------------------------|----------------------------|----------------------------------|------------------------------------------------------------|------------------------------|--------------------------|----------------------------------------------------|----------------------------------------------------|
| <i>Bifido. animalis lactis</i> DN173010              | Rochet 2008, <sup>49</sup> Oswari 2013 <sup>81</sup>                                                                                            | 12, 160                    | FISH PCR                         | healthy volunteers                                         | none, none                   | 10 d, 6 mon              | no change, no change                               | no change, no change                               |
| <i>Bifido. bifidum</i>                               | Langhendries 1995 <sup>82</sup>                                                                                                                 | 20                         | culture                          | healthy volunteers                                         | none                         | 0                        | no change                                          | no change                                          |
| <i>Bifido. longum</i>                                | Benno 1992, <sup>83</sup> Fujiwara 2001, <sup>84</sup> Harmsen 2002 <sup>85</sup>                                                               | 5, 7, 14                   | culture, culture, FISH           | healthy volunteers                                         | none, none, none             | 0, 30 d, 0               | no change, alters, no change                       | no change, alters, no change                       |
| <i>L. casei</i> ND114001                             | Guerin 1998, <sup>86</sup> Rochet 2006, <sup>87</sup> Rochet 2008 <sup>88</sup>                                                                 | 12, 12, 7                  | culture, FISH, FISH              | healthy volunteers                                         | none, none, none             | 1 wk, 10 d, 0            | no change, no change, no change                    | no change, no change, no change                    |
| <i>L. johnsonii</i> Lal                              | Brunser 2006 <sup>89</sup>                                                                                                                      | 32                         | culture & FISH                   | healthy volunteers                                         | none                         | 2 wk                     | no claim                                           | no change                                          |
| <i>L. plantarum</i> 299v                             | Goossens 2003, <sup>90</sup> Goossens 2005, <sup>91</sup> Goossens 2006, <sup>92</sup> Berggren 2003, <sup>93</sup> Karlsson 2010 <sup>94</sup> | 11, 32, 15, 33, 9          | culture, culture, culture, TRFLP | healthy, healthy, colonic polyps, healthy, atherosclerosis | none, none, none, none, none | 3 wk, 4 wk, 0, 0, 0      | no change, no change, no change, no change, alters | no change, no change, no change, no change, alters |
| <i>L. rhamnosus</i> GG                               | Gueimonde 2006 <sup>95</sup>                                                                                                                    | 29                         | PCR                              | healthy volunteers                                         | none                         | 0                        | no change                                          | no change                                          |
| <i>L. salivarius</i> CECT5713                        | Sierra 2010 <sup>96</sup>                                                                                                                       | 20                         | culture                          | healthy volunteers                                         | none                         | 0                        | improves                                           | no change                                          |
| <i>S. boulardii</i> lyo                              | Vanhoutte 2006 <sup>97</sup>                                                                                                                    | 30                         | PCR                              | healthy volunteers                                         | none                         | 0                        | no change                                          | no change                                          |
| <i>Bifido. animalis</i> + <i>Bifido. longum</i>      | Zhong 2006, <sup>98</sup> He 2008 <sup>99</sup>                                                                                                 | 11, 11                     | FISH, FISH                       | healthy volunteers                                         | none                         | 7 d, 7d                  | no change, modifies                                | no change, no change                               |
| <i>L. acidophilic</i> + <i>Bifido. lactis</i>        | Yang 2012 <sup>100</sup>                                                                                                                        | 63                         | culture                          | healthy but 55% <i>H. pylori</i> +                         | none                         | 0                        | restores                                           | alters                                             |
| <i>L. rhamnosus</i> GG + <i>Bifido. longum</i> Bb536 | Mah 2007 <sup>101</sup>                                                                                                                         | 20                         | FISH                             | healthy neonates                                           | none                         | 6 mon                    | no change                                          | no change                                          |
| <i>L. rhamnosus</i> GG + <i>Bifido. lactis</i> Bb12  | Rafter 2007 <sup>102</sup>                                                                                                                      | 38                         | culture                          | colon cancer patients or at risk                           | none                         | 0                        | no change                                          | no change                                          |

|                                                                                                                                                                                                             |                                                                                                                                                                                    |                                  |    |                          |                                   |      |      |                       |           |
|-------------------------------------------------------------------------------------------------------------------------------------------------------------------------------------------------------------|------------------------------------------------------------------------------------------------------------------------------------------------------------------------------------|----------------------------------|----|--------------------------|-----------------------------------|------|------|-----------------------|-----------|
| 1<br>2<br>3<br>4<br>5<br>6<br>7<br>8<br>9<br>10<br>11<br>12<br>13<br>14<br>15<br>16<br>17<br>18<br>19<br>20<br>21<br>22<br>23<br>24<br>25<br>26<br>27<br>28<br>29<br>30<br>31<br>32<br>33<br>34<br>35<br>36 | <i>L. rhamnosus</i> GG + <i>L. gasseri</i> TMC0356                                                                                                                                 | Kubota 2009 <sup>103</sup>       | 14 | culture<br>FISH<br>TRFLP | healthy,<br>allergy<br>patients   | none | 0    | suppressed<br>changes | alters    |
|                                                                                                                                                                                                             | <i>L. paracasei</i> B21060 + <i>L. paracasei</i> B21070 + <i>L. gasseri</i> B21090                                                                                                 | Morelli 2003 <sup>104</sup>      | 12 | culture                  | healthy<br>volunteers             | none | 3 d  | no claims             | no change |
|                                                                                                                                                                                                             | <i>L. acidophilus</i> 1748 + <i>L. paracasei</i> F19 + <i>Bifido. lactis</i> Bb12                                                                                                  | Sullivan 2009 <sup>105</sup>     | 15 | culture                  | chronic<br>fatigue<br>patients    | none | 4 wk | no change             | no change |
|                                                                                                                                                                                                             | <i>L. rhamnosus</i> 271 + <i>L. acidophilus</i> NCFM + <i>L. paracasei</i> 114001 + <i>Bifido. animalis</i> 1017                                                                   | Engelbrektson 2006 <sup>50</sup> | 22 | culture<br>TRFLP<br>PCR  | healthy<br>volunteers             | none | 2 wk | no change             | no change |
|                                                                                                                                                                                                             | <i>Bifido. animalis lactis</i> + <i>L. delbrueckii</i> I-1632 + <i>L. delbrueckii</i> I-1519 + <i>L. lactis cremoris</i>                                                           | McNulty 2011 <sup>106</sup>      | 7  | PCR                      | healthy<br>twins<br>volunteers    | none | 4 wk | no change             | no change |
|                                                                                                                                                                                                             | <i>L. acidophilus</i> + <i>L. paracasei</i> + <i>L. delbrueckii ssp. bulgaricus</i> + <i>L. plantarum</i> + <i>Bifido. longum</i> + <i>Bifido. infantis</i> + <i>Bifido. breve</i> | Vitali 2012 <sup>14</sup>        | 15 | PCR                      | healthy<br>pregnant<br>volunteers | none | 0    | modulates             | no change |

37 \*including strain (when reported)

38 Abbreviations: FISH, fluorescence *in situ* hybridization analysis; TRFLP, terminal restriction fragment  
39 length polymorphism analysis; PCR, polymerase chain reaction  
40  
41  
42  
43  
44  
45  
46  
47  
48  
49  
50  
51  
52  
53  
54  
55  
56  
57  
58  
59  
60

**Table 4.** Comparison of the ability of probiotic to restore or improve dysbiosis with ranked clinical efficacy for various disease indications.

| Probiotic*                                                                                                                                | Restored normal microbiota * | Altered normal microbiota* | Ranked net evidence for efficacy** |     |     |     |    |          |              |                |
|-------------------------------------------------------------------------------------------------------------------------------------------|------------------------------|----------------------------|------------------------------------|-----|-----|-----|----|----------|--------------|----------------|
|                                                                                                                                           |                              |                            | AAD                                | CDI | IBD | IBS | TD | H pylori | Vaginitis/BV | Acute Ped diar |
| <b>Restores microbiota</b>                                                                                                                |                              |                            |                                    |     |     |     |    |          |              |                |
| <i>Clostr. butyricum</i><br>MIYAIRI                                                                                                       | yes                          | nd                         | -                                  |     |     |     |    |          | -            |                |
| <i>L. acidophilus</i> + <i>Bifido. bifidum</i>                                                                                            | yes                          | nd                         | 0                                  | -   |     |     |    |          |              |                |
| <i>L. acidophilus</i> 1748 +<br><i>L. paracasei</i> F19 +<br><i>Bifido. lactis</i> Bb12                                                   | yes                          | nd                         |                                    |     |     | -   |    |          |              |                |
| <i>Bifido. longum</i>                                                                                                                     | yes                          | no                         |                                    |     | -   | +   |    |          |              |                |
| <i>L. acidophilus</i> +<br><i>L. acidophilus</i> +<br><i>Bifido. bifidum</i> + <i>Bifido. animalis</i>                                    | yes                          | nd                         |                                    |     |     |     |    |          |              |                |
| <i>L. acidophilus</i> +<br><i>L. paracasei</i> +<br><i>Bifido. lactis</i> (2)                                                             | yes                          | no                         |                                    |     |     |     |    |          |              |                |
| <i>S. boulardii</i> lyo                                                                                                                   | partial                      | yes                        | ++                                 | ++  | ++  | 0   | +  | -        |              | ++             |
| <i>L. rhamnosus</i> GG                                                                                                                    | partial                      | nd                         | -                                  | -   | -   | 0   | 0  | -        | 0            | ++             |
| <i>L. acidophilus</i>                                                                                                                     | partial                      | no                         | ++                                 |     |     | ++  | -  | -        | +            | 0              |
| <i>L. acidophilus</i> +<br><i>L. bifidus</i> +<br><i>L. rhamnosus</i>                                                                     | partial                      | nd                         |                                    |     |     |     |    |          |              |                |
| <b>Alters microbiota</b>                                                                                                                  |                              |                            |                                    |     |     |     |    |          |              |                |
| <i>E. coli</i> Nissle                                                                                                                     | nd                           | yes                        |                                    |     | -   |     |    |          |              | +              |
| <i>L. casei</i><br>(DN114001 or Lcr35)                                                                                                    | nd                           | yes                        | +                                  |     |     |     |    | 0        | +            | ++             |
| <i>L. rhamnosus</i> GR1 +<br><i>L. fermentum</i> RC14                                                                                     | nd                           | yes                        |                                    |     |     |     |    |          | ++           |                |
| <i>L. plantarum</i> 8PA3 +<br><i>Bifido. bifidum</i>                                                                                      | nd                           | yes                        |                                    |     |     |     |    |          |              |                |
| <i>L. rhamnosus</i> GG +<br><i>L. rhamnosus</i> Lc705 +<br><i>P. freudenreichii</i><br><i>shermanii</i> JS +<br><i>Bifido. breve</i> Bb99 | nd                           | yes                        |                                    |     |     | ++  |    |          |              |                |
| <i>L. acidophilus</i> +<br><i>L. plantarum</i> +<br><i>L. rhamnosus</i> + <i>Bifido</i><br><i>bifidum</i>                                 | nd-                          | yes                        |                                    |     |     |     |    |          |              |                |



|                                                                                                                                                                                                                                     |    |     |   |   |    |   |  |   |   |    |
|-------------------------------------------------------------------------------------------------------------------------------------------------------------------------------------------------------------------------------------|----|-----|---|---|----|---|--|---|---|----|
| <i>L. brevis</i> CD2 +<br><i>L. salivarius</i> FV2 +<br><i>L. plantarum</i> FV9                                                                                                                                                     | nd | yes |   |   |    |   |  |   | + |    |
| <i>L. acidophilus</i> +<br><i>L. paracasei</i> +<br><i>L. delbrueckii</i> ssp.<br><i>bulgaricus</i> +<br><i>L. plantarum</i> , <i>Bifido.</i><br><i>longum</i> , <i>Bifido.</i><br><i>infantis</i> , <i>Bifido.</i><br><i>breve</i> | nd | yes | - |   | ++ | + |  |   |   | ++ |
| <b>No effect on microbiota</b>                                                                                                                                                                                                      |    |     |   |   |    |   |  |   |   |    |
| <i>B. clausii</i>                                                                                                                                                                                                                   | nd | nd  |   |   |    |   |  | - |   | -  |
| <i>L. plantarum</i> 299v                                                                                                                                                                                                            | nd | no  | - | - |    | - |  |   |   |    |
| <i>Bifido. lactis</i>                                                                                                                                                                                                               | nd | no  | + |   |    |   |  |   |   | 0  |
| <i>Bifido. breve</i>                                                                                                                                                                                                                | no | no  |   |   |    |   |  |   |   |    |
| <i>L. acidophilus</i> +<br><i>Bifido. longum</i>                                                                                                                                                                                    | no | --  |   |   |    |   |  |   |   |    |
| <i>L. rhamnosus</i><br>19070-2 +<br><i>L. reuteri</i> DSM                                                                                                                                                                           | nd | no  |   |   |    |   |  |   |   | 0  |
| <i>L. casei</i> +<br><i>Bifido. breve</i>                                                                                                                                                                                           | nd | no  |   |   |    |   |  |   |   |    |
| <i>L. paracasei</i> +<br><i>L. acidophilus</i> +<br><i>Bifido animalis</i>                                                                                                                                                          | nd | no  |   |   |    |   |  |   |   |    |
| <b>Pharmacokinetic only</b>                                                                                                                                                                                                         |    |     |   |   |    |   |  |   |   |    |
| <i>L. reuteri</i> 55730                                                                                                                                                                                                             | nd | nd  |   |   |    |   |  |   |   | +  |
| <i>L. johnsonii</i> La1                                                                                                                                                                                                             | nd | nd  |   |   | -  |   |  | + |   |    |
| <i>L. salivarius</i><br>UCC4331                                                                                                                                                                                                     | nd | nd  |   |   |    | - |  |   |   |    |
| <i>Bifido. infantis</i><br>35624                                                                                                                                                                                                    | nd | nd  |   |   |    | 0 |  |   |   |    |
| <i>Bifido. bifidum</i><br>MIMBb75                                                                                                                                                                                                   | nd | nd  |   |   |    | + |  |   |   |    |
| <i>L. rhamnosus</i> +<br><i>Bifido. longum</i>                                                                                                                                                                                      | nd | nd  |   |   |    |   |  |   |   |    |

\*including strain (when reported)

\*\* **Rank:** ++,  $\geq 2$  net RCTs (randomized controlled trials) with significant protective efficacy; +, only one net protective RCT; 0, equal number of significant and non-significant RCTs; -,  $\geq 1$  net non-significant RCT. Blank indicates no RCT done for the disease indication.

1  
2  
3 **Abbreviations:** nd, not determined; AAD, antibiotic associated diarrhea; CDI, Clostridium  
4 difficile infections; IBD, inflammatory bowel disease; IBS, irritable bowel syndrome; TD,  
5 traveler's diarrhea; BV, bacterial vaginosis; Acute Ped Diar, treatment of acute pediatric  
6 diarrhea.  
7  
8  
9  
10  
11  
12  
13  
14  
15  
16  
17  
18  
19  
20  
21  
22  
23  
24  
25  
26  
27  
28  
29  
30  
31  
32  
33  
34  
35  
36  
37  
38  
39  
40  
41  
42  
43  
44  
45  
46  
47  
48  
49  
50  
51  
52  
53  
54  
55  
56  
57  
58  
59  
60

For peer review only

1  
2  
3  
4  
5  
6 **Contributorship statement:** The listed author made substantial contributions to the conception  
7 and design, acquisition of data, analysis and interpretation of the data, drafting the article and  
8 revising it critically for important intellectual content and had final approval of the version to be  
9 published. No person or persons other than the author has contributed significantly to its  
10 preparation. This manuscript (in full or in part) is not under consideration for publication in any  
11 other journal, nor is a duplicative paper.  
12  
13  
14  
15  
16  
17  
18

19 **Competing interests:** The author has been a paid lecturer for the following companies:  
20 Biocodex, Inc., Lallemand. The author is a member of the Scientific Advisory Board for BioK  
21 Plus International. Biocodex Inc. provided travel expenses for the author to a scientific meeting.  
22  
23  
24  
25

26 **Funding:** This systematic review was unfunded.  
27  
28

29 **Data Sharing:** No additional data available.  
30  
31  
32  
33  
34  
35  
36  
37  
38  
39  
40  
41  
42  
43  
44  
45  
46  
47  
48  
49  
50  
51  
52  
53  
54  
55  
56  
57  
58  
59  
60

## References

1. Katan MB. Why the European Food Safety Authority was right to reject health claims for probiotics. *Benef Microbes* 2012 Jun 1;3(2):85-9.
2. Donovan SM, Schneeman B, Gibson GR, et al. Establishing and evaluating health claims for probiotics. *Amer Soc Nutr Adv Nutri* 2012;3:723-725.
3. European Food Safety Authority (EFSA). Guidance on the scientific requirements for health claims related to gut and immune function. *EFSA Journal* 2011;9(4):1984.
4. Binnendijk KH, Rijkers GT. What is a health benefit? An evaluation of EFSA opinions on health benefits with reference to probiotics. *Benef Microbes* 2013 Sep;4(3):223-30.
5. McFarland LV. Systematic review and meta-analysis of *Saccharomyces boulardii* in adult patients. *World J Gastroenterol* 2010;16(18):2202-22.
6. Buts JP, Stilmant C, Bernasconi P, et al. Characterization of alpha,alpha-trehalase released in the intestinal lumen by the probiotic *Saccharomyces boulardii*. *Scand J Gastroenterol* 2008;43(12):1489-96.
7. McFarland LV. Antibiotic-associated diarrhea: epidemiology, trends and treatment. *Future Microbiol* 2008;3(5):563-578.
8. Dethlefsen L, Huse S, Sogin ML, et al. The Pervasive Effects of an Antibiotic on the Human Gut Microbiota, as Revealed by Deep 16S rRNA Sequencing. *PLoS Biol* 2008;6(11):e280.
9. McFarland LV. Normal flora: diversity and functions. *Microb Ecol Health Dis* 2000;12:193-207.
10. Sanders ME. Impact of probiotics on colonizing microbiota of the gut. *J Clin Gastroenterol* 2011;45(3):S115-S119.
11. Young VB, Schmidt TM. Antibiotic-associated diarrhea accompanied by large-scale alterations in the composition of the fecal microbiota. *J Clin Microbiol* 2004 Mar;42(3):1203-6.
12. Nylund L, Satokari R, Nikkilä J, et al. Microarray analysis reveals marked intestinal microbiota aberrancy in infants having eczema compared to healthy children in at-risk for atopic disease. *BMC Microbiol* 2013 Jan 23;13:12.
13. Prince T, McBain AJ, O'Neill CA. *Lactobacillus reuteri* protects epidermal keratinocytes from *Staphylococcus aureus*-induced cell death by competitive exclusion. *Appl Environ Microbiol* 2012;78(15):5119-26.

14. Vitali B, Cruciani F, Baldassarre ME, et al. Dietary supplementation with probiotics during late pregnancy: outcome on vaginal microbiota and cytokine secretion. *BMC Microbiol* 2012;12:236.
15. Nugent RP, Krohn MA, Hillier SL. Reliability of diagnosing bacterial vaginosis is improved by a standardized method of gram stain interpretation. *J Clin Microbiol* 1991;29(2):297-301.
16. Ciprandi G, Vizzaccaro A, Cirillo I, et al. *Bacillus clausii* exerts immuno-modulatory activity in allergic subjects: a pilot study. *Eur Ann Allergy Clin Immunol* 2005;37(4):129-34.
17. Marseglia GL, Tosca M, Cirillo I, et al. Efficacy of *Bacillus clausii* spores in the prevention of recurrent respiratory infections in children: a pilot study. *Ther Clin Risk Manag* 2007;3(1):13-7.
18. Iniesta M, Herrera D, Montero E, et al. Probiotic effects of orally administered *Lactobacillus reuteri*-containing tablets on the subgingival and salivary microbiota in patients with gingivitis. A randomized clinical trial. *J Clin Periodontol* 2012;39(8):736-44.
19. Shah MP, Gujjari SK, Chandrasekhar VS. Evaluation of the effect of probiotic (inersan®) alone, combination of probiotic with doxycycline and doxycycline alone on aggressive periodontitis - a clinical and microbiological study. *J Clin Diagn Res* 2013;7(3):595-600
20. Teughels W, Durukan A, Ozcelik O, et al. Clinical and microbiological effects of *Lactobacillus reuteri* probiotics in the treatment of chronic periodontitis: a randomized placebo-controlled study. *J Clin Periodontol* 2013;40(11):1025-35.
21. Kleessen B, Bezirtzoglou E, Matto J. culture-based knowledge on biodiversity, development and stability of human gastrointestinal microflora. *Micro Ecol in Health and Dis* 2000;12 (S2):53-63.
22. Schmeisser C, Steele H, Streit WR. Metagenomics, biotechnology with non-culturable microbes. *Appl Microbiol Biotechnol* 2007 Jul;75(5):955-62.
23. Preidis GA, Versalovic J. Targeting the human microbiome with antibiotics, probiotics, and prebiotics: gastroenterology enters the metagenomics era. *Gastroenterol* 2009;136(6):2015-31. PMID: 19462507.
24. Aagaard K, Petrosino J, Keitel W, et al. The Human Microbiome Project strategy for comprehensive sampling of the human microbiome and why it matters. *FASEB J* 2013;27(3):1012-22.
25. Handelsman J. Metagenomics: application of genomics to uncultured microorganisms. *Micro and Molecular Biol Review* 2004;68(4):669-685.
26. Gill SR, Pop M, Deboy RT, et al. Metagenomic analysis of the human distal gut microbiome. *Science* 2006;312(5778):1355-9.

- 1  
2  
3 27. Frank DN, Pace NR. Gastrointestinal microbiology enters the metagenomics era. *Curr Opin*  
4 *Gastroenterol* 2008; 24:4-10.  
5  
6  
7 28. Swidsinski A, Loening-Baucke V, Kirsch S, et al. Functional biostructure of colonic microbiota  
8 (central fermenting area, germinal stock area and separating mucus layer) in healthy subjects and  
9 patients with diarrhea treated with *Saccharomyces boulardii*. *Gastroenterol Clin Biol* 2010;34  
10 Suppl 1:S79-92.  
11  
12  
13  
14 29. Sanders ME, Guarner F, Guerrant R, et al. An update on the use and investigation of probiotics in  
15 health and disease. *Gut* 2013;62:787-796.  
16  
17  
18 30. Moher D, Liberati A, Tetzlaff J, et al. Preferred Reporting Items for Systematic Reviews and Meta-  
19 Analyses: The PRISMA Statement. *BMJ* 2009;339: 332-336.  
20  
21 31. Franks AH, Harmsen HJ, Raangs GC, et al. Variations of bacterial populations in human feces  
22 measured by fluorescent *in situ* hybridization with group-specific 16S rRNA-targeted  
23 oligonucleotide probes. *Appl Environ Microbiol* 1998;64(9):3336-45.  
24  
25  
26 32. Wada M, Nagata S, Saito M, et al. Effects of the enteral administration of *Bifidobacterium breve* on  
27 patients undergoing chemotherapy for pediatric malignancies. *Support Care Cancer*  
28 2010;18(6):751-9.  
29  
30  
31 33. Odamaki T, Xiao JZ, Iwabuchi N, et al. Influence of *Bifidobacterium longum* BB536 intake on  
32 faecal microbiota in individuals with Japanese cedar pollinosis during the pollen season. *J Med*  
33 *Microbiol* 2007;56(Pt 10):1301-8.  
34  
35  
36 34. Seki H, Shiohara M, Matsumura T, et al. Prevention of antibiotic-associated diarrhea in children by  
37 *Clostridium butyricum* MIYAIRI. *Pediatrics International* 2003; 45: 86-90.  
38  
39  
40 35. Mustafa RA, Santesso N, Brozek J, et al. The GRADE approach is reproducible in assessing the  
41 quality of evidence of quantitative evidence syntheses. *J Clin Epidemiol* 2013;66(7):736-42  
42  
43  
44 36. McFarland LV. Meta-analysis of probiotics for prevention of antibiotic associated diarrhea and  
45 treatment of *Clostridium difficile* disease. *Am J Gastroenterol* 2006;101:812-822.  
46  
47  
48 37. McFarland LV, Goh S. Preventing Pediatric Antibiotic-Associated Diarrhea and *Clostridium*  
49 *difficile* Infections with Probiotics: a meta-analysis. *World J Meta-analysis* 2013;1(3): 102-120.  
50  
51  
52 38. Goldenberg JZ, Ma SS, Saxton JD, et al. Probiotics for the prevention of *Clostridium difficile*-  
53 associated diarrhea in adults and children. *Cochrane Database Syst Rev* 2013;5:CD006095.  
54  
55  
56  
57  
58  
59  
60

- 1  
2  
3 39. Shen J, Zuo Z, Mao A. Effect of probiotics on inducing remission and maintaining therapy in  
4 ulcerative colitis, Crohn's disease, and pouchitis: meta-analysis of randomized controlled trials.  
5 *Inflamm Bowel Dis* 2014; 20(1): 21-35.  
6  
7  
8 40. McFarland LV and Dublin S. Meta-analysis of probiotics for the treatment of irritable bowel  
9 syndrome. *World J Gastroenterol* 2008;14(17):2650-61.  
10  
11 41. McFarland LV. Meta-analysis of probiotics for the prevention of traveler's diarrhea. *Travel Med*  
12 *Infect Dis* 2007; 5(2):97-105.  
13  
14 42. Huang H, Song L, Zhao W. Effects of probiotics for the treatment of bacterial vaginosis in adult  
15 women: a meta-analysis of randomized controlled trials. *Arch Gynecol Obstet* 2013 Dec; epub.  
16  
17 43. McFarland LV, Elmer GW and McFarland M. Meta-analysis of Probiotics for the Prevention and  
18 Treatment of Acute Pediatric Diarrhea. *Internl J Probiotics Prebiotics* 2006; 1(1):63-76.  
19  
20 44. Dinleyici EC, Eren M, Ozen M, et al. Effectiveness and safety of *Saccharomyces boulardii* for  
21 acute infectious diarrhea. *Expert Opin Biol Ther* 2012 Apr;12(4):395-410.  
22  
23 45. Szajewska H, Ruszczyński M, Kolaček S. Meta-analysis shows limited evidence for using  
24 *Lactobacillus acidophilus* LB to treat acute gastroenteritis in children. *Acta Paediatr* 2013 Oct  
25 31. ePub.  
26  
27 46. Alvaro E, Andrieux C, Rochet V, et al. Composition and metabolism of the intestinal microbiota in  
28 consumers and non-consumers of yogurt. *Br J Nutr* 2007;97:126-133.  
29  
30 47. Zubadalashvili NG, Makhviladze MA, Diasamidze MT, et al. [The comparative study of Linex and  
31 Lacto-G in treatment of adult patients with disbacteriosis]. Russian. *Georgian Med News*  
32 2009;170:38-42  
33  
34 48. Klein SM, Elmer GW, McFarland LV, et al. Recovery and elimination of the biotherapeutic agent,  
35 *Saccharomyces boulardii*, in healthy human volunteers. *Pharm Res* 1993;10(11):1615-9.  
36  
37 49. Rochet V, Rigottier-Gois L, Ledaire A, et al. Survival of *Bifidobacterium animalis* DN-173 010 in  
38 the faecal microbiota after administration in lyophilised form or in fermented product - a  
39 randomised study in healthy adults. *J Mol Microbiol Biotechnol* 2008;14(1-3):128-36. PMID:  
40 17957120.  
41  
42 50. Engelbrekton AL, Korzenik JR, Sanders ME, et al. Analysis of treatment effects on the microbial  
43 ecology of the human intestine. *FEMS Microbiol Ecol* 2006;57(2):239-50.  
44  
45  
46  
47  
48  
49  
50  
51  
52  
53  
54  
55  
56  
57  
58  
59  
60

- 1  
2  
3  
4 51. Zoppi G, Cinquetti M, Benini A, et al. Modulation of the intestinal ecosystem by probiotics and  
5 lactulose in children during treatment with ceftriaxone. *Current Therapeutic Research*  
6 2001;62(5):418-35.  
7  
8  
9 52. Orrhage K, Brismar B, Nord CE. Effects of supplements of *Bifidobacterium longum* and  
10 *Lactobacillus acidophilus* on the intestinal microbiota during administration of clindamycin.  
11 *Microbial Ecology in Health and Disease* 1994; 7: 17-25.  
12  
13  
14 53. Larsen N, Vogensen FK, Gøbel R, et al. Predominant genera of fecal microbiota in children with  
15 atopic dermatitis are not altered by intake of probiotic bacteria *Lactobacillus acidophilus* NCFM  
16 and *Bifidobacterium animalis* subsp. lactis Bi-07. *FEMS Microbiol Ecol* 2011;75(3):482-96.  
17  
18  
19 54. Lidbeck A, Edlund C, Gustafsson JA, et al. Impact of *Lactobacillus acidophilus* on the normal  
20 intestinal microflora after administration of two antimicrobial agents. *Infection* 1988;16(6):329-  
21 36.  
22  
23  
24 55. Black F, Einarsson K, Lidbeck A, et al. Effect of lactic acid producing bacteria on the human  
25 intestinal microflora during ampicillin treatment. *Scand J Infect Dis* 1991;23(2):247-54.  
26  
27  
28 56. Jernberg C, Sullivan A, Edlund C, et al. Monitoring of antibiotic-induced alterations in the human  
29 intestinal microflora and detection of probiotic strains by use of terminal restriction fragment  
30 length polymorphism. *Appl Environ Microbiol* 2005 Jan;71(1):501-6.  
31  
32  
33 57. Madden JA, Plummer SF, Tang J, et al. Effect of probiotics on preventing disruption of the  
34 intestinal microflora following antibiotic therapy: a double-blind, placebo-controlled pilot study.  
35 *Int Immunopharmacol* 2005;5(6):1091-7.  
36  
37  
38 58. Plummer SF, Garaiova I, Sarvotham T, et al. Effects of probiotics on the composition of the  
39 intestinal microbiota following antibiotic therapy. *Int J Antimicrob Agents* 2005;26(1):69-74.  
40  
41  
42 59. van der Aa LB, Heymans HS, van Aalderen WM, et al. Effect of a new synbiotic mixture on atopic  
43 dermatitis in infants: a randomized-controlled trial. *Clin Exp Allergy* 2010 May;40(5):795-804.  
44  
45  
46 60. Lata J, Novotný I, Příbramská V, et al. The effect of probiotics on gut flora, level of endotoxin and  
47 Child-Pugh score in cirrhotic patients: results of a double-blind randomized study. *Eur J*  
48 *Gastroenterol Hepatol* 2007;19(12):1111-3.  
49  
50  
51 61. Petricevic L, Witt A. The role of *Lactobacillus casei rhamnosus* Lcr35 in restoring the normal  
52 vaginal flora after antibiotic treatment of bacterial vaginosis. *BJOG* 2008;115(11):1369-74.  
53  
54  
55  
56  
57  
58  
59  
60



- 1  
2  
3 62. Nobaek S, Johansson ML, Molin G, et al. Alteration of intestinal microflora is associated with  
4 reduction in abdominal bloating and pain in patients with irritable bowel syndrome. *Am J*  
5 *Gastroenterol* 2000;95(5):1231-1238.  
6  
7  
8  
9 63. Klarin B, Johansson ML, Molin G, et al. Adhesion of the probiotic bacterium *Lactobacillus*  
10 *plantarum* 299v onto the gut mucosa in critically ill patients: a randomised open trial. *Crit Care*  
11 2005;9(3):R285-93.  
12  
13  
14 64. Klarin B, Molin G, Jeppsson B, et al. Use of the probiotic *Lactobacillus plantarum* 299 to reduce  
15 pathogenic bacteria in the oropharynx of intubated patients: a randomised controlled open pilot  
16 study. *Crit Care* 2008;12(6):R136.  
17  
18  
19 65. Girard-Pipau F, Pompei A, Schneider S, et al. Intestinal microflora, short chain and cellular fatty  
20 acids, influence of a probiotic *S. boulardii*. *Microb Ecology Health Dis* 2002; 14:220-227.  
21  
22  
23 66. Swidsinski A, Loening-Baucke V, Verstraelen H, et al. Biostructure of fecal microbiota in healthy  
24 subjects and patients with chronic idiopathic diarrhea. *Gastroenterology* 2008;135(2):568-79.  
25  
26  
27 67. Reid G, Beuerman D, Heinemann C, et al. Probiotic *Lactobacillus* dose required to restore and  
28 maintain a normal vaginal flora. *FEMS Immunol Med Microbiol* 2001;32(1):37-41.  
29  
30  
31 68. Reid G, Charbonneau D, Erb J, et al. Oral use of *Lactobacillus rhamnosus* GR-1 and *L. fermentum*  
32 RC-14 significantly alters vaginal flora: randomized, placebo-controlled trial in 64 healthy  
33 women. *FEMS Immunol Med Microbiol* 2003; 35: 131-4.  
34  
35  
36 69. Kirpich IA, Solovieva NV, Leikhter SN, et al. Probiotics restore bowel flora and improve liver  
37 enzymes in human alcohol-induced liver injury: a pilot study. *Alcohol* 2008 Dec;42(8):675-82.  
38  
39  
40 70. Hummelen R, Changalucha J, Butamanya NL, et al. *Lactobacillus rhamnosus* GR-1 and *L. reuteri*  
41 RC-14 to prevent or cure bacterial vaginosis among women with HIV. *Int J Gynaecol Obstet*  
42 2010;111(3):245-8.  
43  
44  
45 71. Uchida K, Takahashi T, Inoue M, et al. Immunonutritional effects during synbiotics therapy in  
46 pediatric patients with short bowel syndrome. *Pediatr Surg Int* 2007;23(3):243-8.  
47  
48  
49 72. Mastromarino P, Macchia S, Meggiorini L, et al. Effectiveness of *Lactobacillus*-containing vaginal  
50 tablets in the treatment of symptomatic bacterial vaginosis. *Clin Microbiol Infect* 2009;15(1):67-  
51 74.  
52  
53  
54 73. Roessler A, Forssten SD, Gleis M, et al. The effect of probiotics on faecal microbiota and genotoxic  
55 activity of faecal water in patients with atopic dermatitis: a randomized, placebo-controlled  
56 study. *Clin Nutr* 2012;31(1):22-9.  
57  
58  
59  
60

- 1  
2  
3 74. Kajander K, Hatakka K, Poussa T, et al. A probiotic mixture alleviates symptoms in irritable bowel  
4 syndrome patients: a controlled 6 month intervention. *Aliment Pharmacol Ther* 2005;22:387-94.  
5  
6  
7 75. Lyra A, Krogius-Kurikka L, Nikkilä J, et al. Effect of a multispecies probiotic supplement on  
8 quantity of irritable bowel syndrome-related intestinal microbial phylotypes. *BMC Gastroenterol*  
9 2010;10:110.  
10  
11  
12 76. Wong VW, Tse CH, Lam TT, et al. Molecular characterization of the fecal microbiota in patients  
13 with nonalcoholic steatohepatitis--a longitudinal study. *PLoS One* 2013 Apr 25;8(4):e62885.  
14  
15  
16 77. Venturi A, Gionchetti P, Rizzello F, et al. Impact on the composition of the faecal flora by a new  
17 probiotic preparation: preliminary data on maintenance treatment of patients with ulcerative  
18 colitis. *Aliment Pharmacol Ther* 1999;13(8):1103-8.  
19  
20  
21 78. Brigidi P, Vitali B, Swennen E, et al. Effects of probiotic administration upon the composition and  
22 enzymatic activity of human fecal microbiota in patients with irritable bowel syndrome or  
23 functional diarrhea. *Res Microbiol* 2001; 152:735-41.  
24  
25  
26 79. Kuhbacher T, Ott SJ, Helwig U, et al. Bacterial and fungal microbiota in relation to probiotic  
27 therapy (VSL#3) in pouchitis. *Gut* 2006;55:833-41.  
28  
29  
30 80. Ng SC, Lam ERC, Lam TTY, et al. Effect of probiotic bacteria on the intestinal microbiota in  
31 irritable bowel syndrome. *J Gastroenterol Hepatol* 2013; 28:1624-1631.  
32  
33  
34 81. Oswari H, Prayitno L, Dwipoerwantoro PG, et al. Comparison of stool microbiota compositions,  
35 stool alpha1-antitrypsin and calprotectin concentrations, and diarrhoeal morbidity of Indonesian  
36 infants fed breast milk or probiotic/prebiotic-supplemented formula. *J Paediatr Child Health*  
37 2013 June 18, ePub.  
38  
39  
40 82. Langhendries JP, Detry J, Van Hees J, et al. Effect of a fermented infant formula containing viable  
41 Bifidobacteria on the fecal flora composition and pH of healthy full-term infants. *J Ped*  
42 *Gastroenterol Nutr* 1995;21:177-81.  
43  
44  
45 83. Benno Y, Mitsuoka T. Impact of *Bifidobacterium longum* on human fecal microflora. *Microbiol*  
46 *Immunol* 1992;36(7):683-94.  
47  
48  
49 84. Fujiwara S, Seto Y, Kimura A, et al. Intestinal transit of an orally administered streptomycin-  
50 rifampicin-resistant variant of *Bifidobacterium longum* SBT2928: its long-term survival and  
51 effect on the intestinal microflora and metabolism. *J Applied Microbiology* 2001; 90: 43-52.  
52  
53  
54  
55  
56  
57  
58  
59  
60

- 1  
2  
3 85. Harmsen HJ, Raangs GC, Franks AH, et al. The effect of the prebiotic inulin and the probiotic  
4 *Bifidobacterium longum* on the fecal microflora of healthy volunteers measured by FISH and  
5 DGGE. *Micro Ecol Health Dis* 2002; 14:211-219.  
6  
7  
8 86. Guerin-Danan C, Chabanet C, Pedone C, et al. Milk fermented with yogurt cultures and  
9 *Lactobacillus casei* compared with yogurt and gelled milk: influence on intestinal microflora in  
10 healthy infants. *Am J Clin Nutri* 1998;67:111-117.  
11  
12  
13 87. Rochet V, Rigottier-Gois L, Sutren M, et al. Effects of orally administered *Lactobacillus casei*  
14 DN-114 001 on the composition or activities of the dominant faecal microbiota in healthy  
15 humans. *Br J Nutr* 2006;95(2):421-9.  
16  
17  
18 88. Rochet V, Rigottier-Gois L, Levenez F, et al. Modulation of *Lactobacillus casei* in ileal and fecal  
19 samples from healthy volunteers after consumption of a fermented milk containing *Lactobacillus*  
20 *casei* DN-114 001. *Can J Microbiol* 2008 Aug;54(8):660-7.  
21  
22  
23 89. Brunser O, Gotteland M, Cruchet S, et al. Effect of a milk formula with prebiotics on the intestinal  
24 microbiota of infants after an antibiotic treatment. *Pediatric Research* 2006;59(3):451-6.  
25  
26  
27 90. Goossens D, Jonkers D, Russel M, et al. The effect of *Lactobacillus plantarum* 299v on the  
28 bacterial composition and metabolic activity in faeces of healthy volunteers: a placebo-controlled  
29 study on the onset and duration of effects. *Aliment Pharmacol Ther* 2003;18(5):495-505.  
30  
31  
32 91. Goossens D, Jonkers D, Russel M, et al. Survival of the probiotic, *L. plantarum* 299v and its  
33 effects on the faecal bacterial flora, with and without gastric acid inhibition. *Dig Liver Dis*  
34 2005;37(1):44-50.  
35  
36  
37 92. Goossens DA, Jonkers DM, Russel MG, et al. The effect of a probiotic drink with *Lactobacillus*  
38 *plantarum* 299v on the bacterial composition in faeces and mucosal biopsies of rectum and  
39 ascending colon. *Aliment Pharmacol Ther* 2006;23(2):255-63.  
40  
41  
42 93. Berggren A, Soderberg L, Onning G, et al. Intestinal function, microflora and nutrient intake of  
43 children after administration of a fermented oat product containing *Lactobacillus plantarum*  
44 DSM 9843(299v). *Microb Ecol Health Dis* 2003;15:160-168.  
45  
46  
47 94. Karlsson C, Ahrné S, Molin G, et al. Probiotic therapy to men with incipient arteriosclerosis  
48 initiates increased bacterial diversity in colon: a randomized controlled trial. *Atherosclerosis*  
49 2010;208(1):228-33.  
50  
51  
52  
53  
54  
55  
56  
57  
58  
59  
60

- 1  
2  
3 95. Gueimonde M, Sakata S, Kalliomäki M, et al. Effect of maternal consumption of lactobacillus GG  
4 on transfer and establishment of fecal bifidobacterial microbiota in neonates. *J Pediatr*  
5 *Gastroenterol Nutr* 2006;42(2):166-70.  
6  
7  
8  
9 96. Sierra S, Lara-Villoslada F, Sempere L, et al. Intestinal and immunological effects of daily oral  
10 administration of *Lactobacillus salivarius* CECT5713 to healthy adults. *Anaerobe*  
11 2010;16(3):195-200.  
12  
13  
14 97. Vanhoutte T, De Preter V, De Brandt E, et al.. Molecular monitoring of the fecal microbiota of  
15 healthy human subjects during administration of lactulose and *Saccharomyces boulardii*. *Appl*  
16 *Environ Microbiol* 2006;72(9):5990-7.  
17  
18  
19 98. Zhong Y, Huang CY, He T, et al. [Effect of probiotics and yogurt on colonic microflora in subjects  
20 with lactose intolerance]. *Wei Sheng Yan Jiu* 2006;35(5):587-91. Chinese.  
21  
22  
23 99. He T, Priebe MG, Zhong Y, et al. Effects of yogurt and bifidobacteria supplementation on the  
24 colonic microbiota in lactose-intolerant subjects. *J Appl Microbiol* 2008;104(2):595-604.  
25  
26  
27 100. Yang YJ, Sheu BS. Probiotics-containing yogurts suppress *Helicobacter pylori* load and modify  
28 immune response and intestinal microbiota in the *Helicobacter pylori*-infected children.  
29 *Helicobacter* 2012;17(4):297-304.  
30  
31  
32 101. Mah KW, Chin VI, Wong WS, et al. Effect of a milk formula containing probiotics on the fecal  
33 microbiota of Asian infants at risk of atopic diseases. *Pediatr Res* 2007;62(6):674-9.  
34  
35  
36 102. Rafter J, Bennett M, Caderni G, et al. Dietary synbiotics reduce cancer risk factors in  
37 polypectomized and colon cancer patients. *Am J Clin Nutr* 2007;85(2):488-96.  
38  
39  
40 103. Kubota A, He F, Kawase M, et al. Lactobacillus strains stabilize intestinal microbiota in Japanese  
41 cedar pollinosis patients. *Microbiol Immunol* 2009;53(4):198-205.  
42  
43  
44 104. Morelli L, Zonenschain D, Callegari ML, et al. Assessment of a new synbiotic preparation in  
45 healthy volunteers: survival, persistence of probiotic strains and its effect on the indigenous  
46 flora. *Nutr J* 2003;2:11.  
47  
48  
49 105. Sullivan A, Nord CE, Evengard B. Effect of supplement with lactic-acid producing bacteria on  
50 fatigue and physical activity in patients with chronic fatigue syndrome. *Nutr J* 2009;8:1-6.  
51  
52  
53 106. McNulty NP, Yatsunenko T, Hsiao A, et al. The impact of a consortium of fermented milk strains  
54 on the gut microbiome of gnotobiotic mice and monozygotic twins. *Sci Transl Med*  
55 2011;3(106):106ra106.  
56  
57  
58  
59  
60

- 1  
2  
3 107. Guarner F, Khan AG, Garisch J, et al. World Gastroenterology Organization. World  
4 Gastroenterology Organisation Global Guidelines: probiotics and prebiotics October 2011. *J Clin*  
5 *Gastroenterol* 2012;46(6):468-81.  
6  
7  
8  
9 108. United States Department of Health and Human Services Food and Drug Administration, Center  
10 for Food Safety and Applied Nutrition. Dietary Supplements Guidance Documents and  
11 Regulatory Information. 2008. Available at:  
12 [http://www.fda.gov/food/guidanceregulation/guidancedocumentsregulatoryinformation/dietarysu](http://www.fda.gov/food/guidanceregulation/guidancedocumentsregulatoryinformation/dietarysupplements/default.htm)  
13 [pplements/default.htm](http://www.fda.gov/food/guidanceregulation/guidancedocumentsregulatoryinformation/dietarysupplements/default.htm). Accessed: May 29, 2014.  
14  
15  
16  
17 109. Barc MC, Charrin-Sarnel C, Rochet V, et al. Molecular analysis of the digestive microbiota in a  
18 gnotobiotic mouse model during antibiotic treatment: Influence of *Saccharomyces boulardii*.  
19 *Anaerobe* 2008;14(4):229-33.  
20  
21  
22 110. O'Hara AM, Shanahan F. The gut flora as a forgotten organ. *EMBO Reports* 2006;7:688-693.  
23  
24 111. Masood MI, Qadir MI, Shirazi JH, et al. Beneficial effects of lactic acid bacteria on human beings.  
25 *Crit Rev Microbiol* 2011;37(1):91-8.  
26  
27  
28 112. Rijkers GT, de Vos WM, Brummer RJ, et al. Health benefits and health claims of probiotics:  
29 bridging science and marketing. *Br J Nutr* 2011;106(9):1291-6.  
30  
31  
32  
33  
34  
35  
36  
37  
38  
39  
40  
41  
42  
43  
44  
45  
46  
47  
48  
49  
50  
51  
52  
53  
54  
55  
56  
57  
58  
59  
60

1  
2  
3  
4  
5  
6  
7  
8  
9  
10  
11  
12  
13  
14  
15  
16 **Figure 1.** Time sequence of events and three models of study designs determining three different  
17 degrees of dysbiosis correction by probiotics.  
18  
19  
20  
21  
22  
23  
24  
25  
26  
27  
28  
29  
30  
31  
32  
33  
34  
35  
36  
37  
38  
39  
40  
41  
42  
43  
44  
45  
46  
47  
48  
49  
50  
51  
52  
53  
54  
55  
56  
57  
58  
59  
60

Peer review only

1  
2  
3  
4  
5  
6  
7  
8  
9  
10  
11  
12  
13  
14  
15  
16  
17  
18  
19  
20  
21  
22  
23  
24  
25  
26  
27  
28  
29  
30  
31  
32  
33  
34  
35  
36  
37  
38  
39  
40  
41  
42  
43  
44  
45  
46  
47  
48  
49  
50  
51  
52  
53  
54  
55  
56  
57  
58  
59  
60

**Figure 2.** Flow-chart of literature review results (1985-2013) of included and excluded studies for the restoration or improvement of normal microbiota by probiotics. Abbreviations: RCT, randomized-controlled trials; MOA, mechanism of action; NM, normal microbiota.

For peer review only

1  
2  
3  
4  
5 **Use of probiotics to correct dysbiosis of normal microbiota following disease**  
6  
7  
8 **or disruptive events: a systematic review.**  
9

10  
11 Lynne V. McFarland, PhD, MS

12  
13 Affiliate Associate Professor, Department of Medicinal Chemistry, School of Pharmacy,  
14 University of Washington, Seattle, Washington

15  
16  
17 **Corresponding author:** Lynne V. McFarland, PhD, MS

18  
19  
20 **Address:** Metropolitan Park West, 1100 Olive Way, Suite #1400, Seattle,  
21 WA 98101

22 **Telephone:** 206-277-1780

23 **Fax:** 206-764-2935

24 **E-mail address:** [LVMCFARL@u.washington.edu](mailto:LVMCFARL@u.washington.edu)

25  
26  
27 **Disclaimer:** *The findings and conclusions in this study are those of the author  
28 and do not represent the official position of the University.*

29  
30  
31 The corresponding author has the right to grant on behalf of all authors and does grant on behalf  
32 of all authors, a worldwide licence to the Publishers and its licensees in perpetuity, in all  
33 forms, formats and media (whether known now or created in the future), to i) publish,  
34 reproduce, distribute, display and store the Contribution, ii) translate the Contribution  
35 into other languages, create adaptations, reprints, include within collections and create  
36 summaries, extract and/or, abstract of the Contribution, iii) create any other derivative  
37 work(s) based on the Contribution, iv) to exploit all subsidiary rights in the Contribution,  
38 v) the inclusion of electronic links from the Contribution to third party material where-  
39 ever it may be located; and vi) licence any third part to do any or all of the above.  
40  
41  
42

43  
44 **Word Count** 6731

45 **Figures:** 2

46 **Tables:** 4  
47  
48  
49  
50  
51  
52  
53  
54  
55  
56  
57  
58  
59  
60



## ABSTRACT

**Objective:** To assess the evidence for the claim probiotics can correct dysbiosis of the normal microbiota resulting from disease or disruptive events.

**Setting:** Systematic review of published clinical trials of patients receiving a probiotic intervention for the prevention or treatment of various diseases.

**Data sources:** Sources searched (1985-2013): PubMed, EMBASE, Cochrane Database of Systematic Reviews, CINAHL, AMED, and ISI Web of Science. Three on-line clinical trial registries were searched: Cochrane Central Register of Controlled trials, MetaRegister of Controlled Trials, and National Institutes of Health.

**Review methods:** Included studies were randomized clinical trials of probiotic interventions having microbiologic assays. Studies were evaluated following PRISMA guidelines for specific probiotic strains. A standard data extraction form was used to collect the raw data.

**Outcome measures:** The primary outcome is the degree of microbiota correction by specific probiotic strains. Secondary outcome was the association between the degree of dysbiosis correction and clinical efficacy.

**Results:** The review of the literature found three distinct study designs: Model A (restoration) assayed patients enrolled with a healthy, undisturbed microbiota and then assayed post-disruptive event and probiotic therapy; Model B (alteration) assayed patients with pre-existing disrupted microbiota and then post-probiotic therapy; Model C (no dysbiosis) assayed volunteers with no disruptive event pre and post-probiotic. From a total of 63 trials, 83% of the probiotic products using Model A restored the microbiota, 56% using Model B improved the microbiota and only 21% using Model C had any effect on microbiota. Clinical efficacy was more commonly associated with strains capable of restoration of the normal microbiota.

**Conclusions:** The ability to assess the degree of dysbiosis improvement is dependent upon the enrolled population and the timing of microbiologic assays. The functional claim for correcting dysbiosis is poorly supported for most probiotic strains and requires further research.

**Systematic review registration:** PROSPERO (CRD42014007224)

## Strengths and Limitations

### Strengths include:

- A comprehensive review of the published literature from 1985-2013
- Literature search unrestricted by language or country
- Analysis of study designs resulted in novel strategy to limit bias and classify outcomes
- Three types of outcomes of dysbiosis applied to evidence-based studies of specific probiotic strains
- Author has over 40 years of research experience in the probiotic field

### Limitations include:

- Pooled clinical trials using different study populations
- Pooled probiotic doses and regimens
- Indirect evidence linking probiotic strains and dysbiosis
- Review done by sole author

## INTRODUCTION

The popularity of probiotics has expanded exponentially recently, but along with their increased use, debate rages on how probiotics should be regulated and whether probiotics should be considered as a medical food, drug or a food supplement. In the U.S., probiotics are typically available as dietary supplements and thus are limited to 'structure or function' health claims and, unlike prescription drugs, are not permitted to claim to 'treat' or 'cure' disease. In Europe and the United Kingdom, probiotics are allowed to have health or function claims. These claims are required to be supported by well-conducted human trials in the targeted population or in healthy volunteers, but the European Food Safety Authority (EFSA) has rejected >80% of claims submitted to them.<sup>1-3</sup> In many cases, scientific substantiation of a specific health claim was judged insufficient or based on an indirect effect.<sup>4</sup> One such functional claim made for probiotic products is they correct dysbiosis (or the disruption of bacterial and fungal species after antibiotics or other disruptive exposures) and thus may be beneficial to maintain health. Probiotics are active during this susceptible window from the time of the disruptive event to the time when normal microbiota is restored. A wide variety of mechanisms-of-action have been documented for probiotics (ranging from blocking pathogen attachment sites, destruction of the pathogen by bacteriocins or proteases that degrade toxins, to regulation of the immune system),<sup>5,6</sup> and while clinical evidence supports efficacy of some probiotic strains, the evidence linking these mechanisms-of-action to a specific health or function claims is not as clear.

A classic example of the consequence of dysbiosis is antibiotic-associated diarrhea (AAD).<sup>7,8</sup> While antibiotics may be effective in the elimination of pathogenic organisms, a common, unintended effect is the killing or inhibition of beneficial microbes due to shared susceptibility to the antibiotic. One of the many functions for normal microbiota is the ability to resist infection by pathogenic organisms, termed 'colonization resistance'.<sup>9,10</sup> The loss of a sub-population of the normal microbiota, for example, can lead to the loss of the ability to break down fibers and starches into absorbable short chain fatty acids, resulting in high level of undigested carbohydrates, which can trigger diarrhea.<sup>11</sup> Disruption of the normal microbiota has been shown to lead to higher rates of infections in other body systems other than the intestinal tract including the skin,<sup>12,13</sup> vagina,<sup>14,15</sup> respiratory tract,<sup>16,17</sup> and in the buccal cavity.<sup>18-20</sup>

1  
2  
3  
4  
5  
6 The major challenge to establishing a cause and effect for the improvement of dysbiosis by  
7 probiotics is a lack of a standard definition of ‘normal’ microbiota. There is substantial inter-  
8 individual variation of the species of microbes present at different body niches, which also varies  
9 by age, geographic area and health status of the host. In addition, a complete accounting of the  
10 microbiota is currently impossible, as there are no assays to detect all of  $>10^{13}$ - $10^{14}$  organisms in  
11 the intestines and standard microbial culturing methods miss 75-95% of these organisms.<sup>21,22</sup>  
12 The development of metagenomics (cataloguing individual and disease-specific bacterial gene  
13 profiles) and the creation of the international Human Microbiome Project ushered in a new era  
14 for our understanding of the complexity of these interactions within the body.<sup>23,24</sup> This paradigm  
15 shift from culturing to metagenomic analysis has expanded our ability to document shifts in  
16 microbial populations to an unparalleled degree, but the interpretation of these shifts continues to  
17 be under debate.<sup>25-28</sup> With the advent of these newer metagenomic tools, the role of probiotics in  
18 the restoration of normal microbiota is being re-visited.<sup>29</sup>  
19  
20  
21  
22  
23  
24  
25  
26  
27  
28  
29  
30  
31

32 In light of new guidance documents and recommendations, the goal of this systematic review is  
33 to determine how claims for the restoration of the normal microbiota and the correction of  
34 dysbiosis have been studied using well-designed trials and which probiotic strains have  
35 evidence-based data to support these claims.  
36  
37  
38  
39  
40  
41

## 42 **METHODS**

### 43 **Study Objective**

44 To systematically review the literature to analyse the evidence for the claim probiotics can  
45 correct dysbiosis of the normal microbiota from randomised controlled trials.  
46  
47  
48  
49  
50  
51

### 52 **Search Strategy**

53 Search terms included: probiotics + health claims, restoring normal microbiota, dysbiosis,  
54 normal microbiota, pharmacokinetics, metagenomics, probiotics, dietary supplements,  
55  
56  
57  
58  
59  
60

1  
2  
3 randomized controlled trials, antibiotic associated diarrhea (AAD), *Clostridium difficile* infection  
4 (CDI), inflammatory bowel disease (IBD), irritable bowel syndrome (IBS), traveler's diarrhea  
5 (TD), eradication of *Helicobacter pylori*, bacterial vaginosis or vaginitis, treatment of acute  
6 pediatric diarrhea, and specific probiotic strains or products. Search strategies were broad-based  
7 initially, then narrowed to clinical trials with probiotics.  
8  
9

### 13 14 **Data Sources**

15  
16 PubMed (1985-2013), EMBASE (1985-2013), Cochrane Database of Systematic Reviews  
17 (1990-2013), CINAHL (1985-2013), AMED (1985-2013), and ISI Web of Science (2000-2013).  
18 Three on-line clinical trial registries were searched: Cochrane Central Register of Controlled  
19 trials (<http://www.cochrane.org>), MetaRegister of Controlled Trials (<http://www.controlled->  
20 [trials.com/mrct](http://www.controlled-trials.com/mrct)) and National Institutes of Health (<http://www.clinicaltrials.gov>).  
21  
22  
23  
24  
25  
26

### 27 **Criteria for study selection and data extraction**

28 Abstracts of all citations were reviewed by a single author and rated for inclusion for randomized  
29 controlled trials of probiotic treatments. Full articles were retrieved if normal microbiota assays  
30 were mentioned. Non-English language trials were translated and included whenever possible.  
31 Exclusion criteria included pre-clinical studies (animal models or *in vitro* assays), safety or phase  
32 2 studies, reviews, efficacy trials with no assays for normal microbiota species, metagenomic  
33 methods only, mechanism of action of normal microbiota or probiotic, cross-sectional surveys,  
34 case reports or case series, duplicate reports, or trials of unspecified types of probiotics. All  
35 pharmacokinetic studies in humans were reviewed, as abstracts often did not include normal  
36 microbiota assay data. Data extraction and the review process followed the PRISMA statement  
37 guidelines using a 27-item checklist and flow diagram.<sup>30</sup> A standardized data extraction form  
38 was used to collect data on the probiotic (strain type, daily dose, duration), type of controls  
39 (placebo, active or no treatment), study design (status of microbiota at baseline and follow-up  
40 times), type of microbiota assay (microbial culturing, molecular biomarkers, etc.), enrolled study  
41 population (adult vs. pediatric, healthy volunteers, disease condition), type and timing of  
42 disruptive agent (antibiotics, chemotherapy, etc.), study size and attrition, outcome assessment  
43 (efficacy and/or microbiota status at end of study, adverse events) and type of health claim.  
44  
45  
46  
47  
48  
49  
50  
51  
52  
53  
54  
55  
56  
57  
58  
59  
60

## Outcomes and definitions

The primary outcome is the degree of microbiota correction or improvement by specific probiotic strain(s). The secondary outcome is the association between the degree of dysbiosis correction and the net efficacy found from randomized controlled trials of probiotic interventions. Dysbiosis is defined as an alteration or disruption of the normal microbiota (bacterial or fungal species) due to exposure of a disruptive factor (such as antibiotics, chronic disease, stress, medical procedures or medications, etc.). As there is no current standard definition of 'normal' microbiota, for this review, restoration of normal microbiota is defined as a return to the assayed microbial species or profile taken from a healthy individual (before a disruptive event has occurred). Included studies are required to have at least a pre-probiotic treatment assay and a post-probiotic treatment assay. A variety of microbial assays were available during the search period (1985-2013), including documentation of the microbiota by either microbial cultures, or metagenomic methods [16s rRNA-targeted probes using fluorescent *in situ* hybridization (FISH) or other polymerase chain reaction (PCR) technique]<sup>8,21,28,31</sup> or by indirect methods (Nugent scores).<sup>15</sup> Nugent scores (ranged 0-10) are used to diagnose bacterial vaginosis (scores  $\geq 7$ ) or normal vaginal microbiota (scores 0-3) based on the quantitated morphotypes of small gram negative rods (*G. vaginalis/Bacteroides* spp.) and curved gram negative rods (*Mobiluncus* spp.) from gram stains of vaginal discharge smears. Microbial assays of only the strain(s) contained in the probiotic product are considered as pharmacokinetic studies and were not included in the normal microbiota profiles.

**Models of dysbiosis.** To determine the impact on normal microbiota, only direct evidence of microbiota change (species, profiles, diversity indices, or diagnostic criteria) were included and indirect effects were excluded (changes in intestinal enzymes, immune system parameters or disease symptoms). The degree to which dysbiosis was improved is categorized into three levels: (1) recovery of the normal microbiota back to baseline levels; (2) alteration or improvement of the normal microbiota; and (3) no change in normal microbiota.

The literature contained three dysbiosis models: Model A (restoration of the normal microbiota), which assayed patients enrolled with a healthy, undisturbed microbiota and then assayed again after a disruptive event (such as antibiotic exposure) and probiotic therapy occurred; Model B (alteration of the microbiota) assayed patients with pre-existing disrupted microbiota (for

1  
2  
3 example, pre-existing chronic disease or active disease) and then post-probiotic therapy; Model  
4 C (no dysbiosis) assayed volunteers with no disruptive event (before or during the clinical trial)  
5 at both pre-probiotic and post-probiotic times, as shown in Figure 1. 'Recovery' of the normal  
6 microbiota is defined as a restoration of the microbiota back to a normal healthy baseline.  
7 Recovery may be complete recovery (all assayed microbial levels returned to baseline) or  
8 incomplete recovery (partial recovery of some microbial strains, but not all returned to baseline  
9 levels). In studies enrolling subjects with dysbiosis at baseline (typically due to chronic  
10 diseases), it is not possible to show a restoration to normal microbiota levels because a normal,  
11 undisturbed microbiota was not present in these types of study subjects at the time of enrollment.  
12 Therefore, the strongest claim possible for Model B designs is for an 'alteration or improvement'  
13 of the microbiota. Only data from the probiotic-exposed subjects were analysed in this paper.  
14 Data from the control groups were used to confirm dysbiosis for subjects with chronic diseases  
15 or after a disruptive exposure, such as antibiotics or chemotherapy, unaffected by probiotic  
16 exposure.<sup>32-34</sup>  
17  
18  
19  
20  
21  
22  
23  
24  
25  
26  
27  
28  
29

### 30 **Assessment of methodological strength and quality**

31 The GRADE (Grading of Recommendations, Assessment, Development and Evaluation) system  
32 for rating overall study quality will be used for each probiotic strain or type (single strains and  
33 mixtures of strains).<sup>35</sup> Recommendation for the support of the claim of each probiotic strain or  
34 mixture can be assessed by the overall strength of the evidence ["strong", many randomized  
35 controlled trials show significant recovery of the microbiota, or "moderate" only one randomized  
36 controlled trial; or "weak", only case series or reports, limited number of small trials, *etc.*].  
37  
38  
39  
40  
41  
42  
43

44 Quality of the evidence is based on study design and graded as "high quality" (well-defined  
45 study design for determining restoration with normal microbiota, Model A), or "moderate  
46 quality" (disrupted microbiota at baseline, Model B), or "low quality" (no disruptive event  
47 occurred, Model C). Measurement of publication bias was not assessed for this review, as  
48 pooled outcome estimates of efficacy were not done, as typical in meta-analysis, but all studies  
49 with assays of microbiota were included to limit bias.  
50  
51  
52  
53  
54  
55

### 56 **Net efficacy rating**

1  
2  
3 To determine if the ability to correct dysbiosis is associated with clinical efficacy, the published  
4 literature for randomized controlled trials (RCTs) or meta-analyses of probiotics for various  
5 disease indications, including antibiotic associated diarrhea (AAD),<sup>5,36,37</sup> *Clostridium difficile*  
6 infection (CDI),<sup>5,38</sup> inflammatory bowel disease (IBD),<sup>39</sup> irritable bowel syndrome (IBS),<sup>40</sup>  
7 traveler's diarrhea (TD),<sup>41</sup> eradication of *Helicobacter pylori* (Hp),<sup>36,37</sup> bacterial vaginosis (BV)  
8 or vaginitis,<sup>42</sup> and treatment of acute pediatric diarrhea was reviewed.<sup>43-45</sup> The net rank was  
9 calculated by subtracting the number of RCTs showing non-significant or equivalent efficacy  
10 from the number of RCTs having significant efficacies. The ranks were categorized as follows:  
11 ++,  $\geq 2$  net RCTs showing significant efficacy; +, net of one RCT showing significant efficacy; 0,  
12 equal number of RCTs showing significant and non-significant efficacy results and -,  $\geq 1$  net  
13 negative or non-significant RCTs. Probiotics with no RCTs were not ranked.  
14  
15  
16  
17  
18  
19  
20  
21  
22  
23  
24

## 25 RESULTS

26  
27 A review of the literature from 1985-2013 found 353 articles that dealt with probiotic treatments  
28 and their potential effect on normal microbiota.  
29  
30  
31  
32

### 33 Excluded studies

34  
35 As shown in Figure 2, a total of 272 articles were excluded for the following reasons: reviews  
36 (n=116), probiotic efficacy studies with no data on normal microbiota assays (n=54), animal  
37 models of probiotics and changes in microbiota (n=38), metagenomic or microbiota methods  
38 only (n=17), studies on normal microbiota but with no use of probiotics (n=14), *in vitro* assays of  
39 microbiota (n=10), duplicative reports (n=2) or miscellaneous (n=21), which included probiotic  
40 mechanism of action studies, safety studies, duplicative reports, cross-sectional surveys and two  
41 with poorly described probiotic interventions.<sup>46,47</sup> A total of 81 full articles were reviewed which  
42 mentioned changes in normal microbiota or indicated a health claim for probiotics and effects on  
43 normal microbiota.  
44  
45  
46  
47  
48  
49  
50  
51

52 Probiotic pharmacokinetic studies (n=18) reporting concentrations of probiotic strains before and  
53 post-treatment, but did not assaying for other species of normal microbiota were excluded.  
54

55 While several studies using this study design claim probiotics had an impact on normal  
56  
57  
58  
59  
60



1  
2  
3 microbiota, type of data generated is pharmacokinetic behavior of the probiotics themselves and  
4 not the normal microbiota. Several studies stated that the normal microbiota was altered because  
5 an increase in various bacterial species was observed after the probiotics were given, but the  
6 species assayed were those contained in the probiotic product, so an increase is not unexpected.  
7 Pharmacokinetic studies have documented that probiotic strains taken orally can survive transit  
8 through the intestinal tract with recovery rates in feces ranging from <1% to 22%.<sup>48,49</sup> These  
9 pharmacokinetic studies were excluded from this analysis, as they did not assay other types of  
10 normal microbiota not found in the probiotic product.  
11  
12  
13  
14  
15  
16  
17  
18  
19

### 20 **Included studies**

21 Of the 63 included clinical trials, five trials had multiple treatment arms, which resulted in a total  
22 of 68 treatment arms for analysis. Engelbrekton et al. tested a mixture of 5 probiotic strains in  
23 volunteers exposed to antibiotics and also tested a mixture of 4 probiotic strains in healthy  
24 volunteers with no antibiotic exposure.<sup>50</sup> Zoppi et al. had eight different treatment arms in his  
25 study, and probiotic arms were included in our analysis [*Saccharomyces boulardii* (*S. boulardii*)  
26 alone and *Lactobacillus* (*L.*) *rhamnosus* GG alone], a mixture of two probiotics (*L. acidophilus*  
27 and *Bifido. bifidum*) and a mixture of three probiotic strains (*L. acidophilus*, *L. rhamnosus* and  
28 *Bifido. bifidum*).<sup>51</sup> Orrhage et al. had two treatment arms (*Bifido. longum* alone and a mixture of  
29 *Bifido. longum* and *L. acidophilus*).<sup>52</sup> Larsen et al. tested two single probiotics (*Bifido. lactis* and  
30 *L. acidophilus*) in separate treatment arms.<sup>53</sup> Lidbeck et al. gave either enoxacin or clindamycin  
31 and randomized patients to either *L. acidophilus* or placebo.<sup>54</sup>  
32  
33  
34  
35  
36  
37  
38  
39  
40  
41  
42  
43

44 **Normal microbiota assay methods.** Of the 69 treatment arms that did normal microbiota assays,  
45 diverse methods were used to profile the microbiota. Many studies used only standard  
46 microbiological culture assays (37, 54%), while others (28, 40%) used techniques to detect non-  
47 cultivatable bacterial strains, which included metagenomic assays (FISH, TRFLP, 16s rRNA  
48 sequencing) or other PCR techniques. Some studies (4, 6%) used an indirect measure of normal  
49 microbiota, using the Nugent score to diagnose bacterial vaginosis, which relies upon gram stain  
50 of the vaginal secretions, vaginal pH and symptoms to characterize if normal microbiota is  
51 present or absent.<sup>15</sup>  
52  
53  
54  
55  
56  
57  
58  
59  
60

1  
2  
3  
4  
5  
6 **Probiotic strains.** In the 69 treatment arms, most (36, 52%) used a single strain of probiotic,  
7 while 14 (20%) tested a mix of two probiotic strains and 19 (28%) tested a mix of three or more  
8 probiotic strains. The distribution of single versus multiple strain probiotics did not significant  
9 vary by the model of study design ( $\chi^2_2=2.3$ , P=0.32). Of the 15 restorative (Model A) study  
10 arms, 47% used a single strain of probiotic and 53% used multiple strains. Of the 25 treatment  
11 arms with disrupted microbiota at baseline (Model B), 44% used a single strain and 56% used  
12 multiple strains. Of the 29 study arms with undisturbed microbiota (Model C), 62% used a  
13 single strain and 38% used multiple strains.  
14  
15  
16  
17  
18  
19  
20  
21  
22

### 23 **Normal microbiota restoration model (Model A)**

24  
25 Only 10 studies (with 15 treatment arms) using Model A to determine restoration of the  
26 microbiota were found (Table 1).<sup>32,34,50-52,54-58</sup> The type of enrolled subjects varied from healthy  
27 volunteers to children with untreated respiratory infections, to pediatric cancer patients. For  
28 subjects with acute infections or cancer, baseline assays were done prior to the disrupting agent  
29 (antibiotics or chemotherapy). The number of subjects given probiotics averaged 20/study and  
30 ranged from 5 to 83. In 93%, the disruptive factor was antibiotic exposure and in one study,  
31 chemotherapy caused the microbiota disruption. Only 8 (53%) of the study arms did an assay  
32 during a 1-8 week follow-up period after the probiotic was discontinued.  
33  
34  
35  
36  
37  
38  
39  
40  
41  
42

43 Analysis of the probiotic strain(s) separately found only two probiotic products with more than  
44 one randomized controlled trial. The probiotic mix of *L. acidophilus* and *Bifido. bifidum* showed  
45 a complete restoration in one study, but only a partial recovery in the other. (Strength: strong,  
46 Quality: high). The probiotic mix of *L. acidophilus* (2 strains) with *Bifido. bifidum* and *Bifido.*  
47 *animalis* showed complete restoration in one study, but only a partial recovery in the other.  
48 (Strength: strong, Quality: high). Five other probiotic products with only one supporting clinical  
49 trial showed microbiota restoration (*Bifido. longum*, *Clostridium butyricum*, *L. acidophilus*, mix  
50 of *L. acidophilus* with *L. paracasei* and *Bifido. lactis*, and the mix of *L. acidophilus* with *L.*  
51 *paracasei* and *Bifido. bifidum* and two strains of *Bifido. lactis*). (Strength: moderate, Quality:  
52  
53  
54  
55  
56  
57  
58  
59  
60

1  
2  
3 high). Three probiotic products with one supporting clinical trial showed partial restoration (*S.*  
4 *boulevardii*, *L. rhamnosus* GG, mix of *L. rhamnosus* with *L. bifidus* and *L. acidophilus*), (Strength:  
5 moderate, Quality: high). Only two probiotic products using Model A showed no change in the  
6 microbiota (*Bifido. breve* and a mix of *L. acidophilus* and *Bifido. longum*). (Strength: moderate,  
7 Quality: high). In summary, 10 of 12 (83%) of the probiotic products showed complete or partial  
8 restoration of the normal microbiota.  
9  
10  
11  
12  
13  
14  
15  
16  
17

18 Of the 11 probiotic products with claims of 'restores or improves normal microbiota', 10 (91%)  
19 were supported by this review, but only seven showed complete restoration and five had partial  
20 restoration of the microbiota (Table 1). The mixture of *L. acidophilus* and *Bifido. longum* did  
21 not show any changes in the microbiota. Wada et al. claimed *Bifido. breve* 'enhanced intestinal  
22 anaerobes', but this was only compared to the placebo group.<sup>32</sup> Their data showed chemotherapy  
23 is a disruptive event, resulting in more Enterobacteria in the intestine in the placebo group, but  
24 there were no significant differences seen by the end of the 8 week follow-up in either the  
25 probiotic or the placebo group compared to baseline microbiota levels.  
26  
27  
28  
29  
30  
31  
32  
33  
34

### 35 **Disrupted normal microbiota at baseline studies (Model B)**

36  
37 Twenty-four studies (with 25 treatment arms) used Model B that enrolled subjects with a pre-  
38 existing disrupted microbiota related to ongoing disease or conditions (Table 2).<sup>33,53,59-80</sup> The  
39 number of subjects given probiotics averaged  $23 \pm 16$ /study and ranged from 7-83 participants.  
40 The types of pre-existing factors that disrupted the microbiota included atopic dermatitis  
41 patients, allergies, cirrhosis, bacterial vaginosis, irritable bowel syndrome, inflammatory bowel  
42 disease (ulcerative colitis and pouchitis), idiopathic diarrhea, enteral feeding, short-bowel  
43 syndrome and colon cancer. Only 10 (40%) of the study arms did an assay during the post-  
44 probiotic follow-up period.  
45  
46  
47  
48  
49  
50  
51  
52  
53  
54

55 Three of the probiotics had multiple clinical trials to support the claim of an improvement in the  
56 microbiota due to the probiotic. *S. boulevardii* was used in two trials either with enteral fed  
57  
58  
59  
60

1  
2  
3 patients or patients with active diarrhea and found an improvement in the habitual microbiota in  
4 the patients with active diarrhea<sup>66</sup>, but only showed indirect evidence of short-chain fatty acid  
5 changes in the other study.<sup>65</sup> (Strength: strong, Quality: moderate) A mix of four probiotic  
6 strains (2 strains of *L. rhamnosus*, *P. freudenreichii* + *Bifido. breve*) showed improved  
7 microbiota in two clinical trials.<sup>74,75</sup> (Strength: strong, Quality: moderate) Of four clinical trials  
8 testing a mixture of seven probiotic strains, two showed no significant change in microbiota<sup>77,78</sup>,  
9 one showed more anaerobes post-probiotic treatment<sup>79</sup> and one found a reduction in *Bacteroides*  
10 species.<sup>80</sup> (Strength: strong, Quality: moderate) Three clinical trials determined there were no  
11 significant changes due to *L. plantarum* 299v.<sup>62-64</sup> (Strength: strong, Quality: moderate). Of those  
12 probiotics with only one supporting clinical trial (Strength: moderate, Quality: moderate), two  
13 single probiotic strains (*E. coli* Nissle and *L. casei rhamnosus*) and five different mixtures of  
14 probiotic strains support the claim that the probiotic alters the microbiota (Table 2). In summary,  
15 10 of 18 (56%) probiotic products altered or improved microbiota in individuals with pre-  
16 existing disease.  
17  
18  
19  
20  
21  
22  
23  
24  
25  
26  
27  
28  
29  
30  
31

32 Of the 25 treatment arms, the paper's claim was confirmed in 14 (56%) of the studies. There was  
33 no significant change in the microbiota due to the probiotic in nine treatment arms and only an  
34 alteration of the microbiota in five others (Table 2). Our review disagreed with the claimed  
35 outcomes in 11 (46%) of the other treatment arms. In seven treatment arms, it was claimed the  
36 tested probiotic 'restored normal microbiota', but it is uncertain how this conclusion was reached,  
37 since there was no time when a normal undisrupted microbiota was present. Of the seven studies  
38 that claimed their probiotic 'restored' normal microbiota, our analysis determined none were  
39 capable of documenting restoration, but it is confirmed probiotics improved or altered the  
40 microbiota in these studies. Four studies claimed the probiotic 'altered or improved' normal  
41 microbiota, but this review found no significant differences when post-probiotic and baseline  
42 assays were compared for the probiotic groups. Girard-Pipau et al. concluded that *S. boulardii*  
43 'altered normal flora' because more gram positive anaerobes were seen in the probiotic group  
44 compared to the controls and an increase in three short-chain fatty acids were observed in the *S.*  
45 *boulardii* group.<sup>65</sup> However, when the analysis is restricted to trends observed in the probiotic  
46 group only, no significant differences were observed in pre-probiotic versus post-probiotic  
47  
48  
49  
50  
51  
52  
53  
54  
55  
56  
57  
58  
59  
60

1  
2  
3 microbiota profiles. Venturi et al. concluded that the mix of seven probiotic strains enhanced the  
4 concentration of some beneficial strains in the intestines.<sup>77</sup> However, the only strains having a  
5 significant increase were those contained in the probiotic mix, and not specifically normal  
6 microbiota of the host. As this study did not have an undisturbed microbiota baseline, the  
7 increased numbers of Lactobacilli and Bifidobacteria may not have reflected their normal levels.  
8 Van der Aa et al. claimed that *Bifido. breve* 'successfully modulates the intestinal flora', but no  
9 significant changes were observed in the probiotic group when comparing the baseline to the  
10 post-probiotic levels.<sup>59</sup> Odamaki et al. did show an increase in Faecalibacterium ssp. and  
11 *Bacteroides fragilis* ssp. at the end of *Bifido. longum* BB536 treatment, but the same increase  
12 was also observed in the placebo group.<sup>33</sup>  
13  
14  
15  
16  
17  
18  
19  
20  
21  
22  
23

#### 24 **Undisrupted normal microbiota studies (Model C)**

25  
26  
27 Twenty nine trials enrolled healthy adults who had no disruptive factor present during the study  
28 (either no antibiotic or no medication exposure or presence of acute or chronic disease) that  
29 might impact normal microbiota, as shown in Table 3.<sup>14,49,50,81-106</sup> The average number of  
30 subjects given probiotics was 23/study and ranged from 7 to 160/study. Of the 29 study arms,  
31 assays were taken during a follow-up period in only 52%. Fujiwara et al. cultured seven healthy  
32 volunteers and found Enterobacteriaceae and Clostridial species post-*Bifido. longum* was  
33 reduced by 10<sup>1</sup>/g compared to baseline (P<0.03), but no other changes in the microbiota were  
34 detected.<sup>84</sup> Karlsson et al. found a significant increase in intestinal diversity in nine male  
35 volunteers with atherosclerosis given *L. plantarum* 299v, but because terminal restriction  
36 fragment length polymorphism assays were used instead of cultures for bacterial species, the  
37 specific changes in the microbiota species could not be determined.<sup>94</sup> Yang and Sheu cultured 63  
38 children (55% with *H. pylori*) given a yogurt with *L. acidophilus* and *Bifido. lactis* but only  
39 found a decrease in *E. coli* counts in the *H. pylori* negative children sub-group, no significant  
40 changes in normal microbiota was found in the *H. pylori* positive children.<sup>100</sup> Kubota et al.  
41 assayed 29 subjects with Japanese cedar pollen allergy and found milk fermented with *L.*  
42 *rhamnosus* GG and *L. gasseri* TMC0356 suppressed microbiota changes (less intestinal profile  
43 changes), but could not determine specific bacterial species changes due to the type of assay used  
44  
45  
46  
47  
48  
49  
50  
51  
52  
53  
54  
55  
56  
57  
58  
59  
60

1  
2  
3 (FISH and TRFLP).<sup>103</sup> In summary, only 4 of 19 (21%) probiotic products altered microbiota in  
4 healthy individuals who had no disruptive event.  
5  
6  
7  
8  
9

10 Of the seven studies that claimed their probiotic(s) 'restored or altered' the normal microbiota,  
11 only four claims were confirmed. Sierra et al. claimed *L. salivarius* given to 20 healthy adults  
12 'improved gut microbiota', but only increased levels of Lactobacilli were found and no other  
13 changes in normal microbiota species were detected. The only other evidence was indirect from  
14 changes observed in immune parameters.<sup>96</sup> He et al. claimed a mixture of *Bifido. longum* and  
15 *Bifido. animalis* 'modified' microbiota, but changes were seen only during the yogurt  
16 administration and not after the one week follow-up period.<sup>99</sup> Vitali et al. claimed that the  
17 mixture of four Lactobacilli strains and three Bifidobacteria strains 'modulated vaginal  
18 microbiota', but the only significant changes were due to an increase in the bacterial species  
19 contained in the probiotic mixture.<sup>14</sup>  
20  
21  
22  
23  
24  
25  
26  
27  
28  
29  
30

31 Of the probiotics supported by multiple clinical trials (*Bifido. animalis*, *Bifido. longum*, *L. casei*,  
32 *L. plantarum* 299v, the mixture of *Bifido. animalis* and *Bifido. lactis*), 13 of the trials (87%)  
33 support there is no significant change in normal microbiota if the microbiota is not disrupted.  
34 [Strength: strong, Quality: low]  
35  
36  
37  
38  
39  
40  
41

#### 42 **Association of clinical efficacy and normal microbiota restoration**

43  
44 Few studies concurrently compared clinical efficacy and the ability to restore or improve normal  
45 microbiota after dysbiosis. A synthesis of the literature of RCT for eight common disease  
46 indications was performed and the overall net strength was ranked. Probiotics with the ability to  
47 restore normal microbiota were frequently supported by RCTs for efficacy, as shown in Table 4.  
48 Of the 10 probiotics with evidence for restoration, 7 (70%) also had at least one RCT testing for  
49 at least one of the eight diseases, while 30% did not have any supportive RCTs for efficacy. Of  
50 the 7 probiotics with associated RCTs, only two probiotics (*S. boulardii* and *L. acidophilus*) have  
51 strong evidence for efficacy across most of the disease indications, while five probiotics with the  
52  
53  
54  
55  
56  
57  
58  
59  
60

1  
2  
3 ability to restore the microbiota had weak or no evidence of efficacy. For example, *S. boulardii*,  
4 which has studies supporting restoration, has strong evidence for clinical efficacy for AAD  
5 (ranked ++: 11 RCTs had significant results and 6 had non-significant results), CDI (ranked ++:  
6 had two RCTs with significant results), IBD (ranked ++: had two RCTs with significant results),  
7 IBS (ranked 0: had one RCT with significant efficacy and one RCT with non-significant results),  
8 TD (ranked +: 3 RCTs with significant efficacy and 2 with non-significant efficacy), *H. pylori*  
9 eradication (ranked -: 2 RCTs with significant results and 4 with non-significant results) and no  
10 studies for BV. *L. acidophilus*, which partially restored the microbiota in a study, is associated  
11 with clinical efficacy for AAD, IBS and BV, but not for TD or eradication of *H. pylori* and  
12 treatment of acute pediatric diarrhea (ranked ++: had 19 RCTs with significant protection and  
13 five with non-significant results). In contrast, *L. rhamnosus GG*, another probiotic capable of  
14 restoring microbiota, is often cited in meta-analysis as having significant efficacy for AAD. Our  
15 results of an updated review of the literature indicate a net weak evidence rating for clinical  
16 efficacy across all disease indications: AAD (ranked -: 3 RCTs had significant results and 6 had  
17 non-significant results), CDI (ranked -: two RCTs with non-significant results), IBD (ranked -:  
18 one RCT with non-significant results), IBS (ranked 0: 2 RCTs with significant efficacy and two  
19 RCTs with non-significant results), TD (ranked 0: one RCT with significant efficacy and one  
20 with non-significant efficacy), *H. pylori* eradication (ranked -: 3 RCTs with non-significant  
21 results), no RCTs for BV and treatment of acute pediatric diarrhea (ranked ++: 10 RCTs with  
22 significant efficacy and one with non-significant findings).  
23  
24  
25  
26  
27  
28  
29  
30  
31  
32  
33  
34  
35  
36  
37  
38  
39  
40  
41

42 Efficacy trials were not done as frequently for probiotics shown to only have the ability to alter  
43 or improve, but not restore, the microbiota after dysbiosis. Of nine probiotics that can alter the  
44 microbiota, 6 (67%) have supporting RCTs for at least one disease, but the diversity of  
45 investigated diseases was more limited. *L. casei* had moderate net strength for AAD and  
46 bacterial vaginosis, but was neutral for the ability to eradicate *H. pylori* and other disease  
47 indications were not tested in RCTs with *L. casei*. The probiotic mixture of *L. reuteri* and *L.*  
48 *fermentum* has strong evidence for bacterial vaginosis, but not for any other disease indications  
49 listed in Table 4.  
50  
51  
52  
53  
54  
55  
56  
57  
58  
59  
60

1  
2  
3  
4  
5  
6  
7  
8  
9  
10  
11  
12  
13  
14  
15  
16  
17  
18  
19  
20  
21  
22  
23  
24  
25  
26  
27  
28  
29  
30  
31  
32  
33  
34  
35  
36  
37  
38  
39  
40  
41  
42  
43  
44  
45  
46  
47  
48  
49  
50  
51  
52  
53  
54  
55  
56  
57  
58  
59  
60

Of the eight probiotics not capable of altering or restoring normal microbiota, only *L. plantarum* 299v had RCTs for AAD and IBS, both with net negative or weak strength of clinical efficacy. *Bifido. lactis* and the mixture of *L. rhamnosus* and *L. reuteri* had net neutral rankings for efficacy for the treatment of acute pediatric diarrhea. The other four probiotic products with no effect on normal microbiota lacked any RCTs for clinical efficacy. Studies with *B. clausii* did not assay for normal microbiota and had non-significant trial results for *H. pylori* eradication and the treatment of pediatric diarrhea.

Of the six probiotics with only pharmacokinetic data on the probiotic itself and no other investigation of other normal microbiota strains, five had RCTs showing varying net efficacies for different disease indications, as shown in Table 4.

Six popular probiotics (*Bacillus clausii*, *Bifido. infantis*, *L. reuteri*, *L. acidophilus* + *L. helveticus*, *L. acidophilus* + *L. casei* and *L. acidophilus* + *Bifido. animalis*) have only clinical efficacy RCTs, but have not published studies investigating their role in restoring or improving the normal microbiota.

## Discussion

Developing and evaluating health or function claims for probiotics is an important issue and is now identified as a priority for research by several international organizations, including the World Gastroenterology Organization<sup>107</sup> and the American Society for Nutrition.<sup>2</sup> The U.S. Food and Drug Administration has struggled with appropriate evidence-based health claims for probiotic products and currently recommends the use of structure/function claims, such as "maintains bowel regularity", but the claim for restoring normal microbiota is still under debate.<sup>108</sup> The European Food Safety Authority (EFSA) provides guidance materials that recommend health or function claims for probiotics should have beneficial physiological effects and have appropriate scientific trials to substantiate the health claims.<sup>3</sup> Acceptable claims for intestinal health may include functional claims (improved transit time, softer stool consistency, reduction in gastrointestinal discomfort, defense against pathogens). As it is currently not possible to define a standard normal microbiota profile, the EFSA recommends functional claims



1  
2  
3 for the restoration of normal microbiota should document a recovery of healthy microbiota and  
4 be accompanied by a beneficial physiological or clinical outcome.<sup>3</sup> In addition, because the  
5 efficacy and mechanisms are strain-specific and may vary by probiotic strain, the evidence must  
6  
7 be analyzed for each probiotic product individually.<sup>5,6,9,109, 110-112</sup>  
8  
9

10  
11  
12 An underappreciated finding was the influence that study design and study populations have on  
13 the interpretation of study outcomes. In the literature, five different types of study designs are  
14 commonly found relating to probiotics. The most common study type is a randomized controlled  
15 trial testing the efficacy and safety outcomes in patients, but these trials did not typically  
16 document the impact of the probiotic on the normal microbiota. The second most common type  
17 of study design is pharmacokinetic studies (documenting recovery of oral dose of probiotic or  
18 increase in probiotic strains post-treatment compared to pre-treatment or clearance of the  
19 probiotic). Even though these kinetic studies did not assay for non-probiotic strains, some  
20 extrapolated their results and concluded some effect or improvement of the normal microbiota  
21 was observed by their probiotic.<sup>19,111</sup> These two first types of study designs do not support  
22 evidence-based conclusions for the restoration or alteration of the normal microbiota and were  
23 excluded from this review.  
24  
25  
26  
27  
28  
29  
30  
31  
32  
33

34 Three types of study designs are appropriate for the study of dysbiosis. The first type of study  
35 design had normal microbiota assayed at least twice (at baseline, which was before exposure to a  
36 disruptive event or probiotics and then again during or post-probiotic treatment) to show actual  
37 recovery of assayed normal microbiota back to healthy baseline levels. The second type of study  
38 design started with inappropriate baselines (baseline samples taken after normal microbiota had  
39 been disrupted by chronic disease). For patients with established chronic diseases, there is no  
40 “normal microbiota” baseline in either the probiotic or the control group. Even if baselines are  
41 taken during remission, the microbiota may still be impacted by chronic disease or acute  
42 diarrhea. Studies of probiotics in chronic diseases or acute disease typically report on ‘pre-  
43 probiotic treatment’ and ‘post-probiotic treatment’ and may show significant shifts in microbial  
44 species, but it is uncertain if this reflects a true re-establishment of normal microbiota profiles.  
45  
46 The third type of study design enrolled healthy volunteers, who were not challenged with  
47 antibiotics (so no normal microbiota disruption occurred), and show only the effect of probiotics  
48 on a healthy microbiota (typically mild or no effects). Control groups were not required for our  
49  
50  
51  
52  
53  
54  
55  
56  
57  
58  
59  
60

1  
2  
3 assessment of the impact of probiotics on microbiota, but control groups can document the  
4 degree normal microbiota is disrupted by inciting agents (antibiotic, disease onset, etc.).  
5  
6  
7  
8  
9

10 Five single strain probiotics (*Bifido. longum*, *Clost. butyricum*, *L. acidophilus*, *L. rhamnosus* and  
11 *S. boulardii*) and five probiotic mixtures [(*L. acidophilus* + *Bifido. bifidum*), (*L. rhamnosus* + *L.*  
12 *bifidus* + *L. acidophilus*), (*L. acidophilus* + *L. paracasei* + *Bifido. lactis*), (*L. acidophilus*, 2  
13 strains, *Bifido. bifidum*, *Bifido. animalis*) and (*L. acidophilus* + *L. paracasei* + *Bifido. bifidum*  
14 + 2 strains of *Bifido. lactis*)] documented either complete or partial recovery of normal  
15 microbiota (Model A). Only two probiotic mixtures [(2 strain mixture: *L. acidophilus* + *Bifido.*  
16 *bifidum*) and (4 strain mixture: *L. acidophilus*, 2 strains, *Bifido. bifidum*, *Bifido. animalis*)] were  
17 supported by a confirmatory study. Evidence that probiotics may alter or improve normal  
18 microbiota (Model B) was found for three single strain probiotics (*E. coli* Nissle, *S. boulardii*  
19 and *L. casei rhamnosus*) and seven mixtures of 2-7 probiotic strains. Of these ten probiotics  
20 finding alteration of the microbiota, only three had multiple trials [*S. boulardii*, and a four strain  
21 mixture (2 strains of *L. rhamnosus* + *P. freudenreichii* + *Bifido. breve*), and a seven strain  
22 mixture (4 Lactobacilli and 3 Bifidobacteria strains)], but only one had consistent results  
23 showing improvements in the microbiota.<sup>74,75</sup> Clearly, more than one study is needed to confirm  
24 the impact of a probiotic on the normal microbiota. Of the 19 probiotic strains (or mixtures)  
25 studied in healthy volunteers who were not exposed to disruptive factors (Model C), no change  
26 in the normal microbiota was observed for 79%, indicating the robustness of the microbiota.  
27  
28  
29  
30  
31  
32  
33  
34  
35  
36  
37  
38  
39  
40  
41  
42  
43

44 Improvement in the normal microbiota by specific probiotic strains seemed to be associated with  
45 better clinical endpoints. Within eight common diseases typically treated with probiotics, more  
46 trials with significant efficacy were associated with probiotic strains shown to restore the normal  
47 microbiota, and only one trial with significant efficacy was found for probiotics that did not alter  
48 the microbiota. However, few probiotics had efficacy trials for all eight diseases and many did  
49 not have any efficacy trials.  
50  
51  
52  
53  
54  
55  
56  
57  
58  
59  
60

1  
2  
3 Some probiotics which have published efficacy trials for various diseases did not have studies  
4 investigating the effect of the probiotic on normal microbiota: *Bacillus clausii*, *Bifido. infantis*, *L.*  
5 *brevis*, *L. reuteri*, mix of 2 strains (*L. acidophilus* + *L. helveticus*), mix of 2 strains (*L.*  
6 *acidophilus* + *L. casei*) or (*L. acidophilus* + *Bifido. animalis*), mix of 4 strains [*L. rhamnosus* (2  
7 strains), *Propionibacterium freudenreichii* + *Bifido. animalis*] and mix of 7 strains (*L.*  
8 *sporogens*, *L. bifidum*, *L. bulgaricus*, *L. thermophilus*, *L. acidophilus*, *L. casei*, *L. rhamnosus*).

### 17 **Comparison of results with other studies**

19  
20 Other reviews in the literature of claims for probiotics relating to changes in the normal  
21 microbiota have focused on the broad issues of regulatory standardization of health or function  
22 claims, the use of proper study designs and the challenge of defining biomarkers for a 'healthy  
23 microbiota'.<sup>3,29,112</sup> Donovan et al. recommends that health claims for probiotics be supported by  
24 well-conducted human trials in the targeted population.<sup>2</sup> These reviews also recommend that gut  
25 biomarkers need to be correlated with clinical endpoints, however none of these reviews  
26 attempted to do so.<sup>29,112</sup> No prior review has attempted to analyze the association between  
27 probiotic strains and their impact on normal microbiota by stratifying on the quality of study  
28 design.<sup>111</sup> This review addressed these concerns by analyzing probiotic strains by the quality of  
29 the study design and only including trials that assessed the normal microbiota (either by  
30 microbial culturing or molecular strain biomarkers) and assessed the degree of dysbiosis  
31 improvement with clinical outcomes for each probiotic strain.

### 45 **Opportunities for future research**

47 Most of the studies (80%) using Model A to document restoration of the normal microbiota only  
48 used microbiologic culturing techniques, which can only detect those organisms that grow in  
49 culture. Use of the more advanced molecular metagenomic techniques have found that culturing  
50 alone misses up to 95% of these organisms.<sup>21,22</sup> The use of the metagenomic techniques was  
51 more common in the studies using Model B (48%) and Model C (45%) study designs, which  
52 only addresses potential alteration of the microbiota. Characterization of the microbiota is a  
53  
54  
55  
56  
57  
58  
59  
60

1  
2  
3 complex issue and a comprehensive accounting of all the bacterial and fungal strains in the body  
4 is beyond our current capabilities. Therefore, any studies of changes to the microbiota are  
5 incomplete at best, but general trends in bacterial phylotypes can be documented using DNA  
6 probes and metagenomic techniques. Differential detection bias may be present due to the  
7 variety of assays used in these studies and should be accounted for in future studies.  
8  
9  
10  
11

12  
13  
14  
15  
16 Another suggestion for future studies is to include an appropriate follow-up time period post-  
17 probiotic administration. Fewer than half of the reviewed trials did assays for normal microbiota  
18 during an appropriate follow-up period. As it has been shown that recovery from a disrupting  
19 factor can be prolonged (typically eight weeks),<sup>7,8</sup> and studies that failed to find microbiota  
20 recovery might have detected a return to normal baseline levels if a sufficiently long time was  
21 given for the recovery to have occurred. Future studies should strive to allow time for the  
22 restoration of the normal microbiota to occur.  
23  
24  
25  
26  
27  
28

29  
30  
31 As the effects of probiotics are strain specific, and many studies typically only report the genus  
32 and species of the tested probiotic, future reports should include a complete description of the  
33 probiotic to the strain level.<sup>5,112</sup>  
34  
35  
36  
37  
38

### 39 **Strengths and weaknesses**

40  
41  
42 The strengths of this review included the completeness of the search strategy, which reviewed  
43 multiple citation databases, trial registries and author searches, use of established PRISMA  
44 protocols for reviews and the use of an outcome classification scheme for different degrees of  
45 assessment for microbial recovery. This analysis controlled the confounding effects of different  
46 study populations and study designs present in the literature. Pharmacokinetic studies of just the  
47 probiotic strain(s) itself were excluded and only trials that assayed other species found in the  
48 microbiota were included. By applying a standard definition for 'restoring' versus 'improving'  
49 normal microbiota, it is possible to distinguish significant differences by the type of study  
50 designs used and differential effects of the different probiotic strains. Limitations of this review  
51  
52  
53  
54  
55  
56  
57  
58  
59  
60

1  
2  
3 include: a single author reviewed and extracted the literature, pooling trials from different  
4 populations (adult versus pediatric) and different probiotic doses and regimens used. Incomplete  
5 retrieval of all studies assessing the effect that probiotics have on human microbiota is also a  
6 potential limitation of any literature search. Another limitation is that dysbiosis improvement and  
7 clinical efficacy for probiotic strains is also indirectly associated, no direct cause and effect  
8 relationship was possible with the types of studies done. Another limitation is the current lack of  
9 a standard definition of what comprises a 'normal microbiota'. The constituents of the  
10 microbiota vary by individual, by age, geographic location and health status of the host. Current  
11 microbiologic techniques are improving, but can not detect all species present in the host.  
12  
13  
14  
15  
16  
17  
18  
19  
20  
21

## 22 **Conclusion**

23 The challenges in recommending a specific probiotic to patients who need to restore or improve  
24 their normal microbiota after a disrupting event occurs is two-fold: one is the diversity of  
25 probiotic products available and second is the varying strength of evidence provided by clinical  
26 trials using different outcome measures and study designs. By grouping studies into three groups  
27 that result in three different degrees of probiotic effect (restoration, improvement or no change),  
28 an overview of the body of evidence is possible. By comparing the strength of the clinical  
29 evidence for common diseases by the degree to which the probiotics could impact the restoration  
30 of the normal microbiota, it became obvious that those probiotics with a greater ability to restore  
31 the microbiota are associated with the strongest strength of clinical efficacy. While this evidence  
32 only indirectly links clinical efficacy with the ability to restore the microbiota, the overall review  
33 of the evidence shows this is an important mechanism of action for probiotics. What becomes  
34 obvious is that more studies are required to conclude which probiotic strains have a beneficial  
35 impact on the normal microbiota, as most strains have only a single clinical trial and many  
36 probiotic products overstate the strength of their claim to restore normal microbiota. These types  
37 of issues should be considered for health care policy makers and researchers for future studies  
38 and for creating guidelines for health/function claims.  
39  
40  
41  
42  
43  
44  
45  
46  
47  
48  
49  
50  
51  
52  
53  
54  
55  
56  
57  
58  
59  
60

**Table 1. Model A:** Evidence-based data for restoration of normal microbiota (NM) for 12 probiotics from 10 studies (15 treatment arms).

| Probiotic*                                                                                                                                       | Reference                                                | No. treated with probiotic | Type of assay for NM | Enrolled population                    | Type of disrupting factor    | Follow-up post-treatment (wks) | Claims stated in papers   | Evidence-based claim       |
|--------------------------------------------------------------------------------------------------------------------------------------------------|----------------------------------------------------------|----------------------------|----------------------|----------------------------------------|------------------------------|--------------------------------|---------------------------|----------------------------|
| <i>Bifido. breve</i>                                                                                                                             | Wada 2010 <sup>32</sup>                                  | 19                         | FISH                 | pediatric cancer patients              | chemotherapy                 | 8                              | enhances anaerobes        | no change                  |
| <i>Bifido. longum</i> BB536                                                                                                                      | Orrhage 1994 <sup>52</sup>                               | 10                         | culture              | healthy volunteers                     | clindamycin                  | 0                              | restores                  | restores                   |
| <i>Clost. butyricum</i> MIYAIRI                                                                                                                  | Seki 2003 <sup>34</sup>                                  | 83                         | culture              | pediatric respiratory or GI infections | antibiotics                  | 0                              | restores                  | restores                   |
| <i>L. acidophilus</i> NCFB1748                                                                                                                   | Lidbeck 1988 <sup>54</sup>                               | 5                          | culture              | healthy volunteers                     | enoxacin or                  | 1                              | restores only in enoxacin | restores only in enoxacin, |
|                                                                                                                                                  |                                                          | 5                          | culture              | volunteers                             | clindamycin                  | 1                              | no change                 | no change in clindamycin   |
| <i>L. rhamnosus</i> GG                                                                                                                           | Zoppi 2001 <sup>51</sup>                                 | 7                          | culture              | pediatric respiratory infections       | ceftriaxone                  | 0                              | partially corrects        | partially restores         |
| <i>S. boulardii</i> lyo                                                                                                                          | Zoppi 2001 <sup>51</sup>                                 | 6                          | culture              | pediatric respiratory infections       | ceftriaxone                  | 0                              | improves                  | partially restores         |
| <i>L. acidophilus</i> + <i>Bifido. bifidum</i>                                                                                                   | Black 1991, <sup>55</sup><br>Zoppi 2001 <sup>51</sup>    | 10,                        | culture,             | healthy volunteers,                    | ampicillin,                  | 2,                             | recovers more rapidly,    | restores,                  |
|                                                                                                                                                  |                                                          | 7                          | culture              | pediatric respiratory                  | ceftriaxone                  | 0                              | less change               | partially restores         |
| <i>L. acidophilus</i> 1748 + <i>Bifido. longum</i> BB536                                                                                         | Orrhage 1994 <sup>52</sup>                               | 10                         | culture              | healthy volunteers                     | clindamycin                  | 0                              | no change                 | no change                  |
| <i>L. rhamnosus</i> + <i>L. bifidus</i> + <i>L. acidophilus</i>                                                                                  | Zoppi 2001 <sup>51</sup>                                 | 7                          | culture              | pediatric respiratory infections       | ceftriaxone                  | 0                              | partially corrects        | partially restores         |
| <i>L. acidophilus</i> 1748 + <i>L. paracasei</i> F19 + <i>Bifido lactis</i> Bb12                                                                 | Jernberg 2005 <sup>56</sup>                              | 4                          | culture PCR TRFLP    | healthy volunteers                     | clindamycin                  | 2                              | restores                  | restores                   |
| <i>L. acidophilus</i> CUL60+ <i>L. acidophilus</i> CUL21 + <i>Bifido. bifidum</i> CUL17 + <i>Bifido animalis lactis</i>                          | Madden 2005, <sup>57</sup><br>Plummer 2005 <sup>58</sup> | 15,                        | culture,             | <i>H. pylori</i> +,                    | amoxicillin + metronidazole, | 2,                             | restores,                 | restores,                  |
|                                                                                                                                                  |                                                          | 76                         | culture              | <i>H. pylori</i> +                     | amoxicillin + clarithromycin | 2                              | restores more rapidly     | partially restores         |
| <i>L. acidophilus</i> NCFM + <i>L. paracasei</i> Lpc-37 + <i>Bifido. bifidum</i> Bb02+ <i>Bifido. lactis</i> Bi-04 + <i>Bifido. lactis</i> Bi-07 | Engelbrektsen 2006 <sup>50</sup>                         | 20                         | culture PCR TRFLP    | healthy volunteers                     | augmentin                    | 2                              | restores                  | restores                   |

\*including strain (when reported)

**Table 2. Model B:** Evidence-based data for improvement or alteration of normal microbiota (NM) in 18 probiotics from 24 studies (25 treatment arms) with disturbed microbiota at baseline.

| Probiotic*                                                               | Reference                       | No. treated with probiotic | Type(s) of assay for NM   | Pre-existing disrupting factor** | Follow-up time | Claims stated in papers | Evidence-based claim | Type of change found in NM                 |
|--------------------------------------------------------------------------|---------------------------------|----------------------------|---------------------------|----------------------------------|----------------|-------------------------|----------------------|--------------------------------------------|
| <i>Bifido. breve</i> M-16V                                               | Van der Aa 2010 <sup>59</sup>   | 46                         | FISH                      | Atopic dermatitis                | 0              | modulates NF            | no change            | --                                         |
| <i>Bifido. lactis</i> Bi-07                                              | Larsen 2011 <sup>53</sup>       | 17                         | PCR                       | Atopic dermatitis                | 0              | no change               | no change            | --                                         |
| <i>Bifido. longum</i> BB536                                              | Odamaki 2007 <sup>33</sup>      | 22                         | TRFLP PCR                 | Cedar pollen allergy             | 4 wk           | maintains NF            | no change            | --                                         |
| <i>E. coli</i> Nissle                                                    | Lata 2007 <sup>60</sup>         | 22                         | culture                   | liver cirrhosis                  | 0              | restores                | improves             | more Bifido. & Lacto.                      |
| <i>L. acidophilus</i> 700396                                             | Larsen 2011 <sup>53</sup>       | 17                         | PCR                       | atopic dermatitis                | 0              | no change               | no change            | --                                         |
| <i>L. casei rhamnosus</i> Lcr35                                          | Petricevic 2008 <sup>61</sup>   | 83                         | Nugent scores             | bacterial vaginosis              | 4 wk           | restores                | improves             | improved Nugent scores                     |
| <i>L. plantarum</i> 299v                                                 | Nobaek 2000, <sup>62</sup>      | 25,                        | culture,                  | IBS,                             | 4 wk,          | no change,              | no change,           | --                                         |
|                                                                          | Klarin 2005, <sup>63</sup>      | 17,                        | culture,                  | enterally-fed,                   | 0,             | no change,              | no change,           |                                            |
|                                                                          | Klarin 2008 <sup>64</sup>       | 22                         | culture                   | antibiotics                      | 0              | no change,              | no change,           |                                            |
| <i>S. boulardii</i> Iyo                                                  | Girard 2002, <sup>65</sup>      | 10,                        | culture,                  | enterally-fed,                   | 9 d,           | alters NF,              | no change,           | --                                         |
|                                                                          | Swidsinski 2008 <sup>66</sup>   | 20                         | FISH                      | active diarrhea                  | 3 wk           | improves                | improves             | more 'habitual microbiota'                 |
| <i>L. rhamnosus</i> GR-1 + <i>L. fermentum</i> RC14                      | Reid 2001 <sup>67</sup>         | 33                         | Nugent scores             | bacterial vaginosis              | 2 wk           | restores                | improves             | improved Nugent scores                     |
| <i>L. rhamnosus</i> GR-1 + <i>L. fermentum</i> RC14                      | Reid 2003 <sup>68</sup>         | 31                         | Nugent scores and culture | bacterial vaginosis              | 30 d           | restores                | improves             | improved Nugent scores                     |
| <i>L. plantarum</i> 8PA3 + <i>Bifido bifidum</i>                         | Kirpich 2008 <sup>69</sup>      | 32                         | culture                   | colon cancer                     | 0              | restores                | improves             | more <i>E. coli</i> and <i>Enterococci</i> |
| <i>L. rhamnosus</i> GR1 + <i>L. reuteri</i> RC14                         | Hummelen 2010 <sup>70</sup>     | 23                         | Nugent score              | bacterial vaginosis              | 0              | no change               | no change            | --                                         |
| <i>L. casei</i> Shirota+ <i>Bifido breve</i> BBG01                       | Uchida 2007 <sup>71</sup>       | 4                          | culture                   | short bowel syndrome             | 0              | no change               | no change            | --                                         |
| <i>L. brevis</i> CD2 + <i>L. salivaris</i> FV2 + <i>L. plantarum</i> FV9 | Mastromarino 2009 <sup>72</sup> | 19                         | Nugent score              | bacterial vaginosis              | 2 wk           | restores                | improves             | improved Nugent scores                     |

|                                                                                                                                                                                    |                              |     |               |                     |       |                  |            |                                     |
|------------------------------------------------------------------------------------------------------------------------------------------------------------------------------------|------------------------------|-----|---------------|---------------------|-------|------------------|------------|-------------------------------------|
| <i>L. paracasei</i> Lpc37+ <i>L. acidophilus</i> 74-2 + <i>Bifido. animalis</i> DGCC420                                                                                            | Roessler 2012 <sup>73</sup>  | 30  | PCR           | atopic dermatitis   | 0     | no change        | no change  | --                                  |
| <i>L. rhamnosus</i> GG + <i>L. rhamnosus</i> Lc705 + <i>P. freudenreichii shermanii</i> JS + <i>Bifido. breve</i> Bb99                                                             | Kajander 2005, <sup>74</sup> | 41, | PCR,          | IBS,                | 0,    | restores,        | improves,  | Improved similarity index           |
|                                                                                                                                                                                    | Lyra 2010 <sup>75</sup>      | 22  | PCR           | IBS                 | 0     | alters           | alters     | More Clostridia and Rumino-coccus   |
| <i>L. acidophilus</i> 4356 + <i>L. plantarum</i> 14917 + <i>L. rhamnosus</i> 7469 + <i>Bifido. bifidum</i> 2952                                                                    | Wong 2013 <sup>76</sup>      | 7   | PCR           | liver disease       | 0     | improves         | alters     | Less Firmicutes, more Bacteroidetes |
| <i>L. acidophilus</i> + <i>L. paracasei</i> + <i>L. delbrueckii ssp. bulgaricus</i> + <i>L. plantarum</i> + <i>Bifido. longum</i> + <i>Bifido. infantis</i> + <i>Bifido. breve</i> | Venturi 1999, <sup>77</sup>  | 20, | culture       | ulcerative colitis, | 15 d, | enhances,        | no change, | --                                  |
|                                                                                                                                                                                    | Brigidi 2001, <sup>78</sup>  | 10, | culture & PCR | IBS,                | 10 d, | no change,       | no change, | --                                  |
|                                                                                                                                                                                    | Kuhbacher 2006 <sup>79</sup> | 10  | FISH          | pouchitis           | 0     | altered richness | altered    | More anaerobes                      |
|                                                                                                                                                                                    | Ng 2013 <sup>80</sup>        | 10  | PCR           | IBS                 | 0     | modulates        | altered    | Less Bacteroides                    |

\*including strain (when reported)

\*\*disruption of normal microbiota at baseline shown by significant differences compared to control (non-diseased) population.



**Table 3. Model C:** Evidence-based data for improvement or alteration of normal microbiota (NM) in 19 probiotics in healthy volunteers enrolled in 29 studies (29 treatment arms) in studies with no disruptive exposures.

| Probiotic                                            | Reference                                                                                                                                                   | No. treated with probiotic    | Type of assay for NM                                  | Enrolled population                                                    | Type of disrupting factor                | Follow-up post-treatment        | Claims stated in papers                                        | Evidence-based claim                                           |
|------------------------------------------------------|-------------------------------------------------------------------------------------------------------------------------------------------------------------|-------------------------------|-------------------------------------------------------|------------------------------------------------------------------------|------------------------------------------|---------------------------------|----------------------------------------------------------------|----------------------------------------------------------------|
| <i>Bifido. animalis lactis</i> DN173010              | Rochet 2008, <sup>49</sup><br>Oswari 2013 <sup>81</sup>                                                                                                     | 12,<br>160                    | FISH<br>PCR                                           | healthy volunteers                                                     | none,<br>none                            | 10 d,<br>6 mon                  | no change,<br>no change                                        | no change,<br>no change                                        |
| <i>Bifido. bifidum</i>                               | Langhendries 1995 <sup>82</sup>                                                                                                                             | 20                            | culture                                               | healthy volunteers                                                     | none                                     | 0                               | no change                                                      | no change                                                      |
| <i>Bifido. longum</i>                                | Benno 1992, <sup>83</sup><br>Fujiwara 2001, <sup>84</sup><br>Harmsen 2002 <sup>85</sup>                                                                     | 5,<br>7,<br>14                | culture,<br>culture,<br>FISH                          | healthy volunteers                                                     | none,<br>none,<br>none                   | 0,<br>30 d,<br>0                | no change,<br>alters,<br>no change                             | no change,<br>alters,<br>no change                             |
| <i>L. casei</i> ND114001                             | Guerin 1998, <sup>86</sup><br>Rochet 2006, <sup>87</sup><br>Rochet 2008 <sup>88</sup>                                                                       | 12,<br>12,<br>7               | culture,<br>FISH,<br>FISH                             | healthy volunteers                                                     | none,<br>none,<br>none                   | 1 wk,<br>10 d,<br>0             | no change,<br>no change,<br>no change                          | no change,<br>no change,<br>no change                          |
| <i>L. johnsonii</i> Lal                              | Brunser 2006 <sup>89</sup>                                                                                                                                  | 32                            | culture &<br>FISH                                     | healthy volunteers                                                     | none                                     | 2 wk                            | no claim                                                       | no change                                                      |
| <i>L. plantarum</i> 299v                             | Goossens 2003, <sup>90</sup><br>Goossens 2005, <sup>91</sup><br>Goossens 2006, <sup>92</sup><br>Berggren 2003, <sup>93</sup><br>Karlsson 2010 <sup>94</sup> | 11,<br>32,<br>15,<br>33,<br>9 | culture,<br>culture,<br>culture,<br>culture,<br>TRFLP | healthy,<br>healthy,<br>colonic polyps,<br>healthy,<br>atherosclerosis | none,<br>none,<br>none,<br>none,<br>none | 3 wk,<br>4 wk,<br>0,<br>0,<br>0 | no change,<br>no change,<br>no change,<br>no change,<br>alters | no change,<br>no change,<br>no change,<br>no change,<br>alters |
| <i>L. rhamnosus</i> GG                               | Gueimonde 2006 <sup>95</sup>                                                                                                                                | 29                            | PCR                                                   | healthy volunteers                                                     | none                                     | 0                               | no change                                                      | no change                                                      |
| <i>L. salivarius</i> CECT5713                        | Sierra 2010 <sup>96</sup>                                                                                                                                   | 20                            | culture                                               | healthy volunteers                                                     | none                                     | 0                               | improves                                                       | no change                                                      |
| <i>S. boulardii</i> lyo                              | Vanhoutte 2006 <sup>97</sup>                                                                                                                                | 30                            | PCR                                                   | healthy volunteers                                                     | none                                     | 0                               | no change                                                      | no change                                                      |
| <i>Bifido. animalis</i> + <i>Bifido. longum</i>      | Zhong 2006, <sup>98</sup><br>He 2008 <sup>99</sup>                                                                                                          | 11,<br>11                     | FISH,<br>FISH                                         | healthy volunteers                                                     | none                                     | 7 d,<br>7d                      | no change,<br>modifies                                         | no change,<br>no change                                        |
| <i>L. acidophilic</i> + <i>Bifido. lactis</i>        | Yang 2012 <sup>100</sup>                                                                                                                                    | 63                            | culture                                               | healthy but 55% <i>H. pylori</i> +                                     | none                                     | 0                               | restores                                                       | alters                                                         |
| <i>L. rhamnosus</i> GG + <i>Bifido. longum</i> Bb536 | Mah 2007 <sup>101</sup>                                                                                                                                     | 20                            | FISH                                                  | healthy neonates                                                       | none                                     | 6 mon                           | no change                                                      | no change                                                      |
| <i>L. rhamnosus</i> GG + <i>Bifido. lactis</i> Bb12  | Rafter 2007 <sup>102</sup>                                                                                                                                  | 38                            | culture                                               | colon cancer patients or at risk                                       | none                                     | 0                               | no change                                                      | no change                                                      |

|                                                                                                                                                                                    |                                  |    |                          |                                   |      |      |                       |           |
|------------------------------------------------------------------------------------------------------------------------------------------------------------------------------------|----------------------------------|----|--------------------------|-----------------------------------|------|------|-----------------------|-----------|
| <i>L. rhamnosus</i> GG + <i>L. gasseri</i> TMC0356                                                                                                                                 | Kubota 2009 <sup>103</sup>       | 14 | culture<br>FISH<br>TRFLP | healthy,<br>allergy<br>patients   | none | 0    | suppressed<br>changes | alters    |
| <i>L. paracasei</i> B21060 + <i>L. paracasei</i> B21070 + <i>L. gasseri</i> B21090                                                                                                 | Morelli 2003 <sup>104</sup>      | 12 | culture                  | healthy<br>volunteers             | none | 3 d  | no claims             | no change |
| <i>L. acidophilus</i> 1748 + <i>L. paracasei</i> F19 + <i>Bifido. lactis</i> Bb12                                                                                                  | Sullivan 2009 <sup>105</sup>     | 15 | culture                  | chronic<br>fatigue<br>patients    | none | 4 wk | no change             | no change |
| <i>L. rhamnosus</i> 271 + <i>L. acidophilus</i> NCFM + <i>L. paracasei</i> 114001 + <i>Bifido. animalis</i> 1017                                                                   | Engelbrektsen 2006 <sup>50</sup> | 22 | culture<br>TRFLP<br>PCR  | healthy<br>volunteers             | none | 2 wk | no change             | no change |
| <i>Bifido. animalis lactis</i> + <i>L. delbrueckii</i> I-1632 + <i>L. delbrueckii</i> I-1519 + <i>L. lactis cremoris</i>                                                           | McNulty 2011 <sup>106</sup>      | 7  | PCR                      | healthy<br>twins<br>volunteers    | none | 4 wk | no change             | no change |
| <i>L. acidophilus</i> + <i>L. paracasei</i> + <i>L. delbrueckii ssp. bulgaricus</i> + <i>L. plantarum</i> + <i>Bifido. longum</i> + <i>Bifido. infantis</i> + <i>Bifido. breve</i> | Vitali 2012 <sup>14</sup>        | 15 | PCR                      | healthy<br>pregnant<br>volunteers | none | 0    | modulates             | no change |

\*including strain (when reported)

Abbreviations: FISH, fluorescence *in situ* hybridization analysis; TRFLP, terminal restriction fragment length polymorphism analysis; PCR, polymerase chain reaction

**Table 4.** Comparison of the ability of probiotic to restore or improve dysbiosis with ranked clinical efficacy for various disease indications.

| Probiotic*                                                                                                                                | Restored normal microbiota * | Altered normal microbiota* | Ranked net evidence for efficacy** |     |     |     |    |          |              |                |
|-------------------------------------------------------------------------------------------------------------------------------------------|------------------------------|----------------------------|------------------------------------|-----|-----|-----|----|----------|--------------|----------------|
|                                                                                                                                           |                              |                            | AAD                                | CDI | IBD | IBS | TD | H pylori | Vaginitis/BV | Acute Ped diar |
| <b>Restores microbiota</b>                                                                                                                |                              |                            |                                    |     |     |     |    |          |              |                |
| <i>Clostr. butyricum</i><br><i>MIYAIRI</i>                                                                                                | yes                          | nd                         | -                                  |     |     |     |    |          | -            |                |
| <i>L. acidophilus</i> + <i>Bifido. bifidum</i>                                                                                            | yes                          | nd                         | 0                                  | -   |     |     |    |          |              |                |
| <i>L. acidophilus</i> 1748 +<br><i>L. paracasei</i> F19 +<br><i>Bifido. lactis</i> Bb12                                                   | yes                          | nd                         |                                    |     |     | -   |    |          |              |                |
| <i>Bifido. longum</i>                                                                                                                     | yes                          | no                         |                                    |     | -   | +   |    |          |              |                |
| <i>L. acidophilus</i> +<br><i>L. acidophilus</i> +<br><i>Bifido. bifidum</i> + <i>Bifido. animalis</i>                                    | yes                          | nd                         |                                    |     |     |     |    |          |              |                |
| <i>L. acidophilus</i> +<br><i>L. paracasei</i> +<br><i>Bifido. lactis</i> (2)                                                             | yes                          | no                         |                                    |     |     |     |    |          |              |                |
| <i>S. boulardii lyo</i>                                                                                                                   | partial                      | yes                        | ++                                 | ++  | ++  | 0   | +  | -        |              | ++             |
| <i>L. rhamnosus GG</i>                                                                                                                    | partial                      | nd                         | -                                  | -   | -   | 0   | 0  | -        | 0            | ++             |
| <i>L. acidophilus</i>                                                                                                                     | partial                      | no                         | ++                                 |     |     | ++  | -  | -        | +            | 0              |
| <i>L. acidophilus</i> +<br><i>L. bifidus</i> +<br><i>L. rhamnosus</i>                                                                     | partial                      | nd                         |                                    |     |     |     |    |          |              |                |
| <b>Alters microbiota</b>                                                                                                                  |                              |                            |                                    |     |     |     |    |          |              |                |
| <i>E. coli</i> Nissle                                                                                                                     | nd                           | yes                        |                                    |     | -   |     |    |          |              | +              |
| <i>L. casei</i><br>(DN114001 or Lcr35)                                                                                                    | nd                           | yes                        | +                                  |     |     |     |    | 0        | +            | ++             |
| <i>L. rhamnosus</i> GR1 +<br><i>L. fermentum</i> RC14                                                                                     | nd                           | yes                        |                                    |     |     |     |    |          | ++           |                |
| <i>L. plantarum</i> 8PA3 +<br><i>Bifido. bifidum</i>                                                                                      | nd                           | yes                        |                                    |     |     |     |    |          |              |                |
| <i>L. rhamnosus</i> GG +<br><i>L. rhamnosus</i> Lc705 +<br><i>P. freudenreichii</i><br><i>shermanii</i> JS +<br><i>Bifido. breve</i> Bb99 | nd                           | yes                        |                                    |     |     | ++  |    |          |              |                |
| <i>L. acidophilus</i> +<br><i>L. plantarum</i> +<br><i>L. rhamnosus</i> + <i>Bifido</i><br><i>bifidum</i>                                 | nd-                          | yes                        |                                    |     |     |     |    |          |              |                |

|                                                                                                                                                                                                                                     |    |     |   |   |    |   |  |   |   |    |
|-------------------------------------------------------------------------------------------------------------------------------------------------------------------------------------------------------------------------------------|----|-----|---|---|----|---|--|---|---|----|
| <i>L. brevis</i> CD2 +<br><i>L. salivarius</i> FV2 +<br><i>L. plantarum</i> FV9                                                                                                                                                     | nd | yes |   |   |    |   |  |   | + |    |
| <i>L. acidophilus</i> +<br><i>L. paracasei</i> +<br><i>L. delbrueckii ssp.</i><br><i>bulgaricus</i> +<br><i>L. plantarum</i> , <i>Bifido.</i><br><i>longum</i> , <i>Bifido.</i><br><i>infantis</i> , <i>Bifido.</i><br><i>breve</i> | nd | yes | - |   | ++ | + |  |   |   | ++ |
| <b>No effect on microbiota</b>                                                                                                                                                                                                      |    |     |   |   |    |   |  |   |   |    |
| <i>B. clausii</i>                                                                                                                                                                                                                   | nd | nd  |   |   |    |   |  | - |   | -  |
| <i>L. plantarum</i> 299v                                                                                                                                                                                                            | nd | no  | - | - |    | - |  |   |   |    |
| <i>Bifido. lactis</i>                                                                                                                                                                                                               | nd | no  | + |   |    |   |  |   |   | 0  |
| <i>Bifido. breve</i>                                                                                                                                                                                                                | no | no  |   |   |    |   |  |   |   |    |
| <i>L. acidophilus</i> +<br><i>Bifido. longum</i>                                                                                                                                                                                    | no | --  |   |   |    |   |  |   |   |    |
| <i>L. rhamnosus</i><br>19070-2 +<br><i>L. reuteri</i> DSM                                                                                                                                                                           | nd | no  |   |   |    |   |  |   |   | 0  |
| <i>L. casei</i> +<br><i>Bifido. breve</i>                                                                                                                                                                                           | nd | no  |   |   |    |   |  |   |   |    |
| <i>L. paracasei</i> +<br><i>L. acidophilus</i> +<br><i>Bifido animalis</i>                                                                                                                                                          | nd | no  |   |   |    |   |  |   |   |    |
| <b>Pharmacokinetic only</b>                                                                                                                                                                                                         |    |     |   |   |    |   |  |   |   |    |
| <i>L. reuteri</i> 55730                                                                                                                                                                                                             | nd | nd  |   |   |    |   |  |   |   | +  |
| <i>L. johnsonii</i> La1                                                                                                                                                                                                             | nd | nd  |   |   | -  |   |  | + |   |    |
| <i>L. salivarius</i><br>UCC4331                                                                                                                                                                                                     | nd | nd  |   |   |    | - |  |   |   |    |
| <i>Bifido. infantis</i><br>35624                                                                                                                                                                                                    | nd | nd  |   |   |    | 0 |  |   |   |    |
| <i>Bifido. bifidum</i><br>MIMBb75                                                                                                                                                                                                   | nd | nd  |   |   |    | + |  |   |   |    |
| <i>L. rhamnosus</i> +<br><i>Bifido. longum</i>                                                                                                                                                                                      | nd | nd  |   |   |    |   |  |   |   |    |

\*including strain (when reported)

\*\* **Rank:** ++,  $\geq 2$  net RCTs (randomized controlled trials) with significant protective efficacy; +, only one net protective RCT; 0, equal number of significant and non-significant RCTs; -,  $\geq 1$  net non-significant RCT. Blank indicates no RCT done for the disease indication.

**Abbreviations:** nd, not determined; AAD, antibiotic associated diarrhea; CDI, Clostridium difficile infections; IBD, inflammatory bowel disease; IBS, irritable bowel syndrome; TD, traveler’s diarrhea; BV, bacterial vaginosis; Acute Ped Diar, treatment of acute pediatric diarrhea.

For peer review only

1  
2  
3  
4  
5  
6  
7  
8  
9  
10  
11  
12  
13  
14  
15  
16  
17  
18  
19  
20  
21  
22  
23  
24  
25  
26  
27  
28  
29  
30  
31  
32  
33  
34  
35  
36  
37  
38  
39  
40  
41  
42  
43  
44  
45  
46  
47  
48  
49  
50  
51  
52  
53  
54  
55  
56  
57  
58  
59  
60

1  
2  
3  
4  
5  
6 **Contributorship statement:** The listed author made substantial contributions to the conception  
7 and design, acquisition of data, analysis and interpretation of the data, drafting the article and  
8 revising it critically for important intellectual content and had final approval of the version to be  
9 published. No person or persons other than the author has contributed significantly to its  
10 preparation. This manuscript (in full or in part) is not under consideration for publication in any  
11 other journal, nor is a duplicative paper.  
12  
13  
14  
15  
16  
17  
18

19 **Competing interests:** The author has been a paid lecturer for the following companies:  
20 Biocodex, Inc., Lallemand. The author is a member of the Scientific Advisory Board for BioK  
21 Plus International. Biocodex Inc. provided travel expenses for the author to a scientific meeting.  
22  
23  
24  
25

26 **Funding:** This systematic review was unfunded.  
27  
28

29 **Data Sharing:** No additional data available.  
30  
31  
32  
33  
34  
35  
36  
37  
38  
39  
40  
41  
42  
43  
44  
45  
46  
47  
48  
49  
50  
51  
52  
53  
54  
55  
56  
57  
58  
59  
60

## References

1. Katan MB. Why the European Food Safety Authority was right to reject health claims for probiotics. *Benef Microbes* 2012 Jun 1;3(2):85-9.
2. Donovan SM, Schneeman B, Gibson GR, Sanders ME. Establishing and evaluating health claims for probiotics. *Amer Soc Nutr Adv Nutri* 2012;3:723-725.
3. European Food Safety Authority (EFSA). Guidance on the scientific requirements for health claims related to gut and immune function. *EFSA Journal* 2011;9(4):1984.
4. Binnendijk KH, Rijkers GT. What is a health benefit? An evaluation of EFSA opinions on health benefits with reference to probiotics. *Benef Microbes* 2013 Sep;4(3):223-30.
5. McFarland LV. Systematic review and meta-analysis of *Saccharomyces boulardii* in adult patients. *World J Gastroenterol* 2010;16(18):2202-22.
6. Buts JP, Stilmant C, Bernasconi P, Neirinck C, De Keyser N. Characterization of alpha,alpha-trehalase released in the intestinal lumen by the probiotic *Saccharomyces boulardii*. *Scand J Gastroenterol* 2008;43(12):1489-96.
7. McFarland LV. Antibiotic-associated diarrhea: epidemiology, trends and treatment. *Future Microbiol* 2008;3(5):563-578.
8. Dethlefsen L, Huse S, Sogin ML, Relman DA. The Pervasive Effects of an Antibiotic on the Human Gut Microbiota, as Revealed by Deep 16S rRNA Sequencing. *PLoS Biol* 2008;6(11):e280.
9. McFarland LV. Normal flora: diversity and functions. *Microb Ecol Health Dis* 2000;12:193-207.
10. Sanders ME. Impact of probiotics on colonizing microbiota of the gut. *J Clin Gastroenterol* 2011;45(3):S115-S119.
11. Young VB, Schmidt TM. Antibiotic-associated diarrhea accompanied by large-scale alterations in the composition of the fecal microbiota. *J Clin Microbiol* 2004 Mar;42(3):1203-6.
12. Nylund L, Satokari R, Nikkilä J, Rajilić-Stojanović M, Kalliomäki M, Isolauri E, Salminen S, de Vos WM. Microarray analysis reveals marked intestinal microbiota aberrancy in infants having eczema compared to healthy children in at-risk for atopic disease. *BMC Microbiol* 2013 Jan 23;13:12.
13. Prince T, McBain AJ, O'Neill CA. *Lactobacillus reuteri* protects epidermal keratinocytes from *Staphylococcus aureus*-induced cell death by competitive exclusion. *Appl Environ Microbiol* 2012;78(15):5119-26.

- 1  
2  
3 14. Vitali B, Cruciani F, Baldassarre ME, Capursi T, Spisni E, Valerii MC, Candela M, Turrone S,  
4  
5 Brigidi P. Dietary supplementation with probiotics during late pregnancy: outcome on vaginal  
6  
7 microbiota and cytokine secretion. *BMC Microbiol* 2012;12:236.
- 8  
9 15. Nugent RP, Krohn MA, Hillier SL. Reliability of diagnosing bacterial vaginosis is improved by a  
10  
11 standardized method of gram stain interpretation. *J Clin Microbiol* 1991;29(2):297-301.
- 12  
13 16. Ciprandi G, Vizzaccaro A, Cirillo I, Tosca MA. *Bacillus clausii* exerts immuno-modulatory activity  
14  
15 in allergic subjects: a pilot study. *Eur Ann Allergy Clin Immunol* 2005;37(4):129-34.
- 16  
17 17. Marseglia GL, Tosca M, Cirillo I, Licari A, Leone M, Marseglia A, Castellazzi AM, Ciprandi G.  
18  
19 Efficacy of *Bacillus clausii* spores in the prevention of recurrent respiratory infections in  
20  
21 children: a pilot study. *Ther Clin Risk Manag* 2007;3(1):13-7.
- 22  
23 18. Iniesta M, Herrera D, Montero E, Zurbriggen M, Matos AR, Marín MJ, Sánchez-Beltrán MC,  
24  
25 Llama-Palacio A, Sanz M. Probiotic effects of orally administered *Lactobacillus reuteri*-  
26  
27 containing tablets on the subgingival and salivary microbiota in patients with gingivitis. A  
28  
29 randomized clinical trial. *J Clin Periodontol* 2012;39(8):736-44.
- 30  
31 19. Shah MP, Gujjari SK, Chandrasekhar VS. Evaluation of the effect of probiotic (inersan®) alone,  
32  
33 combination of probiotic with doxycycline and doxycycline alone on aggressive periodontitis - a  
34  
35 clinical and microbiological study. *J Clin Diagn Res* 2013;7(3):595-600
- 36  
37 20. Teughels W, Durukan A, Ozcelik O, Pauwels M, Quirynen M, Haytac MC. Clinical and  
38  
39 microbiological effects of *Lactobacillus reuteri* probiotics in the treatment of chronic  
40  
41 periodontitis: a randomized placebo-controlled study. *J Clin Periodontol* 2013;40(11):1025-35.
- 42  
43 21. Kleessen B, Bezirtzoglou E, Matto J. culture-based knowledge on biodiversity, development and  
44  
45 stability of human gastrointestinal microflora. *Micro Ecol in Health and Dis* 2000;12 (S2):53-63.
- 46  
47 22. Schmeisser C, Steele H, Streit WR. Metagenomics, biotechnology with non-culturable microbes.  
48  
49 *Appl Microbiol Biotechnol* 2007 Jul;75(5):955-62.
- 50  
51 23. Preidis GA, Versalovic J. Targeting the human microbiome with antibiotics, probiotics, and  
52  
53 prebiotics: gastroenterology enters the metagenomics era. *Gastroenterol* 2009;136(6):2015-31.  
54  
55 PMID: 19462507.
- 56  
57 24. Aagaard K, Petrosino J, Keitel W, Watson M, Katancik J, Garcia N, Patel S, Cutting M, Madden T,  
58  
59 Hamilton H, Harris E, Gevers D, Simone G, McInnes P, Versalovic J. The Human Microbiome  
60  
Project strategy for comprehensive sampling of the human microbiome and why it matters.  
*FASEB J* 2013;27(3):1012-22.



- 1  
2  
3 25. Handelsman J. Metagenomics: application of genomics to uncultured microorganisms. *Micro and*  
4  
5 *Molecular Biol Review* 2004;68(4):669-685.  
6
- 7 26. Gill SR, Pop M, Deboy RT, Eckburg PB, Turnbaugh PJ, Samuel BS, Gordon JI, Relman DA,  
8  
9 Fraser-Liggett CM, Nelson KE. Metagenomic analysis of the human distal gut microbiome.  
10  
11 *Science* 2006;312(5778):1355-9.
- 12 27. Frank DN, Pace NR. Gastrointestinal microbiology enters the metagenomics era. *Curr Opin*  
13  
14 *Gastroenterol* 2008; 24:4-10.
- 15 28. Swidsinski A, Loening-Baucke V, Kirsch S, Doerffel Y. Functional biostructure of colonic  
16  
17 microbiota (central fermenting area, germinal stock area and separating mucus layer) in healthy  
18  
19 subjects and patients with diarrhea treated with *Saccharomyces boulardii*. *Gastroenterol Clin*  
20  
21 *Biol* 2010;34 Suppl 1:S79-92.
- 22 29. Sanders ME, Guarner F, Guerrant R, Holt PR, Quigley EMM, Sartor RB, Sherman PM, Mayer EA.  
23  
24 An update on the use and investigation of probiotics in health and disease. *Gut* 2013;62:787-796.
- 25 30. Moher D, Liberati A, Tetzlaff J, Altman DG, The PRISMA Group. Preferred Reporting Items for  
26  
27 Systematic Reviews and Meta-Analyses: The PRISMA Statement. *BMJ* 2009;339: 332-336.
- 28 31. Franks AH, Harmsen HJ, Raangs GC, Jansen GJ, Schut F, Welling GW Variations of bacterial  
29  
30 populations in human feces measured by fluorescent *in situ* hybridization with group-specific  
31  
32 16S rRNA-targeted oligonucleotide probes. *Appl Environ Microbiol* 1998;64(9):3336-45.
- 33 32. Wada M, Nagata S, Saito M, Shimizu T, Yamashiro Y, Matsuki T, Asahara T, Nomoto K. Effects  
34  
35 of the enteral administration of *Bifidobacterium breve* on patients undergoing chemotherapy for  
36  
37 pediatric malignancies. *Support Care Cancer* 2010;18(6):751-9.
- 38 33. Odamaki T, Xiao JZ, Iwabuchi N, Sakamoto M, Takahashi N, Kondo S, Miyaji K, Iwatsuki K,  
39  
40 Togashi H, Enomoto T, Benno Y. Influence of *Bifidobacterium longum* BB536 intake on faecal  
41  
42 microbiota in individuals with Japanese cedar pollinosis during the pollen season. *J Med*  
43  
44 *Microbiol* 2007;56(Pt 10):1301-8.
- 45 34. Seki H, Shiohara M, Matsumura T, Miyagawa N, Tanaka M, Komiyama A, Kurata S. Prevention of  
46  
47 antibiotic-associated diarrhea in children by *Clostridium butyricum* MIYAIRI. *Pediatrics*  
48  
49 *International* 2003; 45: 86-90.
- 50 35. Mustafa RA, Santesso N, Brozek J, Akl EA, Walter SD, et al. The GRADE approach is  
51  
52 reproducible in assessing the quality of evidence of quantitative evidence syntheses. *J Clin*  
53  
54 *Epidemiol* 2013;66(7):736-42  
55  
56  
57  
58  
59  
60

- 1  
2  
3 36. McFarland LV. Meta-analysis of probiotics for prevention of antibiotic associated diarrhea and  
4 treatment of *Clostridium difficile* disease. *Am J Gastroenterol* 2006;101:812-822.  
5  
6  
7 37. McFarland LV, Goh S. Preventing Pediatric Antibiotic-Associated Diarrhea and *Clostridium*  
8 *difficile* Infections with Probiotics: a meta-analysis. *World J Meta-analysis* 2013;1(3): 102-120.  
9  
10 38. Goldenberg JZ, Ma SS, Saxton JD, Martzen MR, Vandvik PO, Thorlund K, Guyatt GH, Johnston  
11 BC. Probiotics for the prevention of *Clostridium difficile*-associated diarrhea in adults and  
12 children. *Cochrane Database Syst Rev* 2013;5:CD006095.  
13  
14 39. Shen J, Zuo Z, Mao A. Effect of probiotics on inducing remission and maintaining therapy in  
15 ulcerative colitis, Crohn's disease, and pouchitis: meta-analysis of randomized controlled trials.  
16 *Inflamm Bowel Dis* 2014; 20(1): 21-35.  
17  
18 40. McFarland LV and Dublin S. Meta-analysis of probiotics for the treatment of irritable bowel  
19 syndrome. *World J Gastroenterol* 2008;14(17):2650-61.  
20  
21 41. McFarland LV. Meta-analysis of probiotics for the prevention of traveler's diarrhea. *Travel Med*  
22 *Infect Dis* 2007; 5(2):97-105.  
23  
24 42. Huang H, Song L, Zhao W. Effects of probiotics for the treatment of bacterial vaginosis in adult  
25 women: a meta-analysis of randomized controlled trials. *Arch Gynecol Obstet* 2013 Dec; epub.  
26  
27 43. McFarland LV, Elmer GW and McFarland M. Meta-analysis of Probiotics for the Prevention and  
28 Treatment of Acute Pediatric Diarrhea. *Internl J Probiotics Prebiotics* 2006; 1(1):63-76.  
29  
30 44. Dinleyici EC, Eren M, Ozen M, Yargic ZA, Vandenplas Y. Effectiveness and safety of  
31 *Saccharomyces boulardii* for acute infectious diarrhea. *Expert Opin Biol Ther* 2012  
32 Apr;12(4):395-410.  
33  
34 45. Szajewska H, Ruszczyński M, Kolaček S. Meta-analysis shows limited evidence for using  
35 *Lactobacillus acidophilus* LB to treat acute gastroenteritis in children. *Acta Paediatr* 2013 Oct  
36 31. ePub.  
37  
38 46. Alvaro E, Andrieux C, Rochet V, Rigottier-Gois L, Lepercq P, Sutren M, Galan P, Duval Y, Juste  
39 C, Dore J. Composition and metabolism of the intestinal microbiota in consumers and non-  
40 consumers of yogurt. *Br J Nutr* 2007;97:126-133.  
41  
42 47. Zubadalashvili NG, Makhviladze MA, Diasamidze MT, Abdulashvili INN. [The comparative study  
43 of Linex and Lacto-G in treatment of adult patients with disbacteriosis]. Russian. *Georgian Med*  
44 *News* 2009;170:38-42  
45  
46  
47  
48  
49  
50  
51  
52  
53  
54  
55  
56  
57  
58  
59  
60

- 1  
2  
3 48. Klein SM, Elmer GW, McFarland LV, Surawicz CM, Levy RH. Recovery and elimination of the  
4  
5 biotherapeutic agent, *Saccharomyces boulardii*, in healthy human volunteers. *Pharm Res*  
6  
7 1993;10(11):1615-9.
- 8  
9 49. Rochet V, Rigottier-Gois L, Ledaire A, Andrieux C, Sutren M, Rabot S, Mogenet A, Bresson JL,  
10  
11 Cools S, Picard C, Goupil-Feuillerat N, Doré J. Survival of *Bifidobacterium animalis* DN-173  
12  
13 010 in the faecal microbiota after administration in lyophilised form or in fermented product - a  
14  
15 randomised study in healthy adults. *J Mol Microbiol Biotechnol* 2008;14(1-3):128-36. PMID:  
16  
17 17957120.
- 18 50. Engelbrekton AL, Korzenik JR, Sanders ME, Clement BG, Leyer G, Klaenhammer TR, Kitts CL.  
19  
20 Analysis of treatment effects on the microbial ecology of the human intestine. *FEMS Microbiol*  
21  
22 *Ecol* 2006;57(2):239-50.
- 23 51. Zoppi G, Cinquetti M, Benini A, Bonamini E, Minelli EB. Modulation of the intestinal ecosystem  
24  
25 by probiotics and lactulose in children during treatment with ceftriaxone. *Current Therapeutic*  
26  
27 *Research* 2001;62(5):418-35.
- 28 52. Orrhage K, Brismar B, Nord CE. Effects of supplements of *Bifidobacterium longum* and  
29  
30 *Lactobacillus acidophilus* on the intestinal microbiota during administration of clindamycin.  
31  
32 *Microbial Ecology in Health and Disease* 1994; 7: 17-25.
- 33 53. Larsen N, Vogensen FK, Gøbel R, Michaelsen KF, Abu Al-Soud W, Sørensen SJ, Hansen LH,  
34  
35 Jakobsen M. Predominant genera of fecal microbiota in children with atopic dermatitis are not  
36  
37 altered by intake of probiotic bacteria *Lactobacillus acidophilus* NCFM and *Bifidobacterium*  
38  
39 *animalis* subsp. *lactis* Bi-07. *FEMS Microbiol Ecol* 2011;75(3):482-96.
- 40 54. Lidbeck A, Edlund C, Gustafsson JA, Kager L, Nord CE. Impact of *Lactobacillus acidophilus* on  
41  
42 the normal intestinal microflora after administration of two antimicrobial agents. *Infection*  
43  
44 1988;16(6):329-36.
- 45 55. Black F, Einarsson K, Lidbeck A, Orrhage K, Nord CE. Effect of lactic acid producing bacteria on  
46  
47 the human intestinal microflora during ampicillin treatment. *Scand J Infect Dis* 1991;23(2):247-  
48  
49 54.
- 50  
51 56. Jernberg C, Sullivan A, Edlund C, Jansson JK. Monitoring of antibiotic-induced alterations in the  
52  
53 human intestinal microflora and detection of probiotic strains by use of terminal restriction  
54  
55 fragment length polymorphism. *Appl Environ Microbiol* 2005 Jan;71(1):501-6.
- 56  
57  
58  
59  
60

- 1  
2  
3 57. Madden JA, Plummer SF, Tang J, Garaiova I, Plummer NT, Herbison M, Hunter JO, Shimada T,  
4 Cheng L, Shirakawa T. Effect of probiotics on preventing disruption of the intestinal microflora  
5 following antibiotic therapy: a double-blind, placebo-controlled pilot study. *Int*  
6 *Immunopharmacol* 2005;5(6):1091-7.  
7  
8  
9  
10 58. Plummer SF, Garaiova I, Sarvotham T, Cottrell SL, Le Scouiller S, Weaver MA, Tang J, Dee P,  
11 Hunter J. Effects of probiotics on the composition of the intestinal microbiota following  
12 antibiotic therapy. *Int J Antimicrob Agents* 2005;26(1):69-74.  
13  
14  
15 59. van der Aa LB, Heymans HS, van Aalderen WM, Sillevius Smitt JH, Knol J, Ben Amor K, Goossens  
16 DA, Sprikkelman AB; Synbad Study Group. Effect of a new synbiotic mixture on atopic  
17 dermatitis in infants: a randomized-controlled trial. *Clin Exp Allergy* 2010 May;40(5):795-804.  
18  
19  
20 60. Lata J, Novotný I, Příbramská V, Juránková J, Fric P, Kroupa R, Stibůrek O. The effect of  
21 probiotics on gut flora, level of endotoxin and Child-Pugh score in cirrhotic patients: results of a  
22 double-blind randomized study. *Eur J Gastroenterol Hepatol* 2007;19(12):1111-3.  
23  
24  
25 61. Petricevic L, Witt A. The role of *Lactobacillus casei rhamnosus* Lcr35 in restoring the normal  
26 vaginal flora after antibiotic treatment of bacterial vaginosis. *BJOG* 2008;115(11):1369-74.  
27  
28  
29 62. Nobaek S, Johansson ML, Molin G, Ahrne S, Jeppsson B. Alteration of intestinal microflora is  
30 associated with reduction in abdominal bloating and pain in patients with irritable bowel  
31 syndrome. *Am J Gastroenterol* 2000;95(5):1231-1238.  
32  
33  
34 63. Klarin B, Johansson ML, Molin G, Larsson A, Jeppsson B. Adhesion of the probiotic bacterium  
35 *Lactobacillus plantarum* 299v onto the gut mucosa in critically ill patients: a randomised open  
36 trial. *Crit Care* 2005;9(3):R285-93.  
37  
38  
39 64. Klarin B, Molin G, Jeppsson B, Larsson A. Use of the probiotic *Lactobacillus plantarum* 299 to  
40 reduce pathogenic bacteria in the oropharynx of intubated patients: a randomised controlled open  
41 pilot study. *Crit Care* 2008;12(6):R136.  
42  
43  
44 65. Girard-Pipau F, Pompei A, Schneider S, Nano JL, Hebuterne X, Boquet P, Rampal P. Intestinal  
45 microflora, short chain and cellular fatty acids, influence of a probiotic *S. boulardii*. *Microb*  
46 *Ecology Health Dis* 2002; 14:220-227.  
47  
48  
49 66. Swidsinski A, Loening-Baucke V, Verstraelen H, Osowska S, Doerffel Y. Biostructure of fecal  
50 microbiota in healthy subjects and patients with chronic idiopathic diarrhea. *Gastroenterology*  
51 2008;135(2):568-79.  
52  
53  
54  
55  
56  
57  
58  
59  
60

- 1  
2  
3 67. Reid G, Beuerman D, Heinemann C, Bruce AW. Probiotic *Lactobacillus* dose required to restore and  
4 maintain a normal vaginal flora. *FEMS Immunol Med Microbiol* 2001;32(1):37-41.  
5  
6  
7 68. Reid G, Charbonneau D, Erb J, Kochanowski B, Beuerman D, Poehner R, Bruce AW. Oral use of  
8 *Lactobacillus rhamnosus* GR-1 and *L. fermentum* RC-14 significantly alters vaginal flora:  
9 randomized, placebo-controlled trial in 64 healthy women. *FEMS Immunol Med Microbiol* 2003;  
10 35: 131-4.  
11  
12  
13 69. Kirpich IA, Solovieva NV, Leikhter SN, Shidakova NA, Lebedeva OV, Sidorov PI, Bazhukova TA,  
14 Soloviev AG, Barve SS, McClain CJ, Cave M. Probiotics restore bowel flora and improve liver  
15 enzymes in human alcohol-induced liver injury: a pilot study. *Alcohol* 2008 Dec;42(8):675-82.  
16  
17  
18 70. Hummelen R, Changalucha J, Butamanya NL, Cook A, Habbema JD, Reid G. *Lactobacillus*  
19 *rhamnosus* GR-1 and *L. reuteri* RC-14 to prevent or cure bacterial vaginosis among women with  
20 HIV. *Int J Gynaecol Obstet* 2010;111(3):245-8.  
21  
22  
23 71. Uchida K, Takahashi T, Inoue M, Morotomi M, Otake K, Nakazawa M, Tsukamoto Y, Miki C,  
24 Kusunoki M. Immunonutritional effects during synbiotics therapy in pediatric patients with short  
25 bowel syndrome. *Pediatr Surg Int* 2007;23(3):243-8.  
26  
27  
28 72. Mastromarino P, Macchia S, Meggiorini L, Trinchieri V, Mosca L, Perluigi M, Midulla C.  
29 Effectiveness of *Lactobacillus*-containing vaginal tablets in the treatment of symptomatic  
30 bacterial vaginosis. *Clin Microbiol Infect* 2009;15(1):67-74.  
31  
32  
33 73. Roessler A, Forssten SD, Gleis M, Ouwehand AC, Jahreis G. The effect of probiotics on faecal  
34 microbiota and genotoxic activity of faecal water in patients with atopic dermatitis: a  
35 randomized, placebo-controlled study. *Clin Nutr* 2012;31(1):22-9.  
36  
37  
38 74. Kajander K, Hatakka K, Pousa T, Farkkila M, Korpela R. A probiotic mixture alleviates symptoms  
39 in irritable bowel syndrome patients: a controlled 6 month intervention. *Aliment Pharmacol Ther*  
40 2005;22:387-94.  
41  
42  
43 75. Lyra A, Krogius-Kurikka L, Nikkilä J, Malinen E, Kajander K, Kurikka K, Korpela R, Palva A.  
44 Effect of a multispecies probiotic supplement on quantity of irritable bowel syndrome-related  
45 intestinal microbial phylotypes. *BMC Gastroenterol* 2010;10:110.  
46  
47  
48 76. Wong VW, Tse CH, Lam TT, Wong GL, Chim AM, Chu WC, Yeung DK, Law PT, Kwan HS, Yu  
49 J, Sung JJ, Chan HL. Molecular characterization of the fecal microbiota in patients with  
50 nonalcoholic steatohepatitis--a longitudinal study. *PLoS One* 2013 Apr 25;8(4):e62885.  
51  
52  
53  
54  
55  
56  
57  
58  
59  
60

- 1  
2  
3  
4 77. Venturi A, Gionchetti P, Rizzello F, Johansson R, Zucconi E, Brigidi P, Matteuzzi D, Campieri M.  
5 Impact on the composition of the faecal flora by a new probiotic preparation: preliminary data on  
6 maintenance treatment of patients with ulcerative colitis. *Aliment Pharmacol Ther*  
7 1999;13(8):1103-8.  
8  
9  
10 78. Brigidi P, Vitali B, Swennen E, Bazzocchi G, Matteuzzi D. Effects of probiotic administration  
11 upon the composition and enzymatic activity of human fecal microbiota in patients with irritable  
12 bowel syndrome or functional diarrhea. *Res Microbiol* 2001; 152:735-41.  
13  
14 79. Kuhbacher T, Ott SJ, Helwig U, Mimura T, Rizzello F, et al. Bacterial and fungal microbiota in  
15 relation to probiotic therapy (VSL#3) in pouchitis. *Gut* 2006;55:833-41.  
16  
17 80. Ng SC, Lam ERC, Lam TTY, Chan T, Law W, Tse TCH, Kamm MA, Sung JJY, Chan FKL, Wu  
18 JCY. Effect of probiotic bacteria on the intestinal microbiota in irritable bowel syndrome. *J*  
19 *Gastroenterol Hepatol* 2013; 28:1624-1631.  
20  
21 81. Oswari H, Prayitno L, Dwipoerwantoro PG, Firmansyah A, Makrides M, Lawley B, Kuhn-Sherlock  
22 B, Cleghorn G, Tannock GW. Comparison of stool microbiota compositions, stool alpha1-  
23 antitrypsin and calprotectin concentrations, and diarrhoeal morbidity of Indonesian infants fed  
24 breast milk or probiotic/prebiotic-supplemented formula. *J Paediatr Child Health* 2013 June 18,  
25 ePub.  
26  
27 82. Langhendries JP, Detry J, Van Hees J, Lamboray M, Darimont J, Mozin MJ, Secretin C, Senterre J.  
28 Effect of a fermented infant formula containing viable Bifidobacteria on the fecal flora  
29 composition and pH of healthy full-term infants. *J Ped Gastroenterol Nutr* 1995;21:177-81.  
30  
31 83. Benno Y, Mitsuoka T. Impact of *Bifidobacterium longum* on human fecal microflora. *Microbiol*  
32 *Immunol* 1992;36(7):683-94.  
33  
34 84. Fujiwara S, Seto Y, Kimura A, Hashiba H. Intestinal transit of an orally administered streptomycin-  
35 rifampicin-resistant variant of *Bifidobacterium longum* SBT2928: its long-term survival and  
36 effect on the intestinal microflora and metabolism. *J Applied Microbiology* 2001; 90: 43-52.  
37  
38 85. Harmsen HJ, Raangs GC, Franks AH, Wildeboer-Veloo A, Welling G. The effect of the prebiotic  
39 inulin and the probiotic *Bifidobacterium longum* on the fecal microflora of healthy volunteers  
40 measured by FISH and DGGE. *Micro Ecol Health Dis* 2002; 14:211-219.  
41  
42 86. Guerin-Danan C, Chabanet C, Pedone C, Popot F, Vaissade P, Bouley C, Szylit O, Andrieux C.  
43 Milk fermented with yogurt cultures and *Lactobacillus casei* compared with yogurt and gelled  
44 milk: influence on intestinal microflora in healthy infants. *Am J Clin Nutri* 1998;67:111-117.  
45  
46  
47  
48  
49  
50  
51  
52  
53  
54  
55  
56  
57  
58  
59  
60

- 1  
2  
3 87. Rochet V, Rigottier-Gois L, Sutren M, Kremetscki MN, Andrieux C, Furet JP, Tailliez P, Levenez  
4 F, Mogenet A, Bresson JL, Méance S, Cayuela C, Leplingard A, Doré J. Effects of orally  
5 administered *Lactobacillus casei* DN-114 001 on the composition or activities of the dominant  
6 faecal microbiota in healthy humans. *Br J Nutr* 2006;95(2):421-9.  
7  
8  
9  
10 88. Rochet V, Rigottier-Gois L, Levenez F, Cadiou J, Marteau P, Bresson JL, Goupil-Feillerat N, Doré  
11 J. Modulation of *Lactobacillus casei* in ileal and fecal samples from healthy volunteers after  
12 consumption of a fermented milk containing *Lactobacillus casei* DN-114 001. *Can J Microbiol*  
13 2008 Aug;54(8):660-7.  
14  
15  
16  
17 89. Brunser O, Gotteland M, Cruchet S, Figueroa G, Garrido D, Steenhout P. Effect of a milk formula  
18 with prebiotics on the intestinal microbiota of infants after an antibiotic treatment. *Pediatric*  
19 *Research* 2006;59(3):451-6.  
20  
21  
22  
23 90. Goossens D, Jonkers D, Russel M, Stobberingh E, Van Den Bogaard A, StockbrUgger R. The effect  
24 of *Lactobacillus plantarum* 299v on the bacterial composition and metabolic activity in faeces of  
25 healthy volunteers: a placebo-controlled study on the onset and duration of effects. *Aliment*  
26 *Pharmacol Ther* 2003;18(5):495-505.  
27  
28  
29  
30 91. Goossens D, Jonkers D, Russel M, Thijs A, van den Bogaard A, Stobberingh E, Stockbrügger  
31 R. Survival of the probiotic, *L. plantarum* 299v and its effects on the faecal bacterial flora, with  
32 and without gastric acid inhibition. *Dig Liver Dis* 2005;37(1):44-50.  
33  
34  
35  
36 92. Goossens DA, Jonkers DM, Russel MG, Stobberingh EE, Stockbrügger RW. The effect of a  
37 probiotic drink with *Lactobacillus plantarum* 299v on the bacterial composition in faeces and  
38 mucosal biopsies of rectum and ascending colon. *Aliment Pharmacol Ther* 2006;23(2):255-63.  
39  
40  
41 93. Berggren A, Soderberg L, Onning G, Hagslatt M, Axelsson I. Intestinal function, microflora and  
42 nutrient intake of children after administration of a fermented oat product containing  
43 *Lactobacillus plantarum* DSM 9843(299v). *Microb Ecol Health Dis* 2003;15:160-168.  
44  
45  
46 94. Karlsson C, Ahrné S, Molin G, Berggren A, Palmquist I, Fredrikson GN, Jeppsson B. Probiotic  
47 therapy to men with incipient arteriosclerosis initiates increased bacterial diversity in colon: a  
48 randomized controlled trial. *Atherosclerosis* 2010;208(1):228-33.  
49  
50  
51 95. Gueimonde M, Sakata S, Kalliomäki M, Isolauri E, Benno Y, Salminen S. Effect of maternal  
52 consumption of lactobacillus GG on transfer and establishment of fecal bifidobacterial  
53 microbiota in neonates. *J Pediatr Gastroenterol Nutr* 2006;42(2):166-70.  
54  
55  
56  
57  
58  
59  
60

- 1  
2  
3 96. Sierra S, Lara-Villoslada F, Sempere L, Olivares M, Boza J, Xaus J. Intestinal and immunological  
4 effects of daily oral administration of *Lactobacillus salivarius* CECT5713 to healthy adults.  
5  
6 *Anaerobe* 2010;16(3):195-200.  
7  
8 97. Vanhoutte T, De Preter V, De Brandt E, Verbeke K, Swings J, Huys G. Molecular monitoring of the  
9 fecal microbiota of healthy human subjects during administration of lactulose and  
10  
11 *Saccharomyces boulardii*. *Appl Environ Microbiol* 2006;72(9):5990-7.  
12  
13 98. Zhong Y, Huang CY, He T, Harmsen HM. [Effect of probiotics and yogurt on colonic microflora in  
14 subjects with lactose intolerance]. *Wei Sheng Yan Jiu* 2006;35(5):587-91. Chinese.  
15  
16 99. He T, Priebe MG, Zhong Y, Huang C, Harmsen HJ, Raangs GC, Antoine JM, Welling GW, Vonk  
17 RJ. Effects of yogurt and bifidobacteria supplementation on the colonic microbiota in lactose-  
18 intolerant subjects. *J Appl Microbiol* 2008;104(2):595-604.  
19  
20 100. Yang YJ, Sheu BS. Probiotics-containing yogurts suppress *Helicobacter pylori* load and modify  
21 immune response and intestinal microbiota in the *Helicobacter pylori*-infected children.  
22  
23 *Helicobacter* 2012;17(4):297-304.  
24  
25 101. Mah KW, Chin VI, Wong WS, Lay C, Tannock GW, Shek LP, Aw MM, Chua KY, Wong HB,  
26 Panchalingham A, Lee BW. Effect of a milk formula containing probiotics on the fecal  
27  
28 microbiota of Asian infants at risk of atopic diseases. *Pediatr Res* 2007;62(6):674-9.  
29  
30 102. Rafter J, Bennett M, Caderni G, Clune Y, Hughes R, Karlsson PC, Klinder A, O'Riordan M,  
31 O'Sullivan GC, Pool-Zobel B, Rechkemmer G, Roller M, Rowland I, Salvadori M, Thijs H, Van  
32 Loo J, Watzl B, Collins JK. Dietary synbiotics reduce cancer risk factors in polypectomized and  
33  
34 colon cancer patients. *Am J Clin Nutr* 2007;85(2):488-96.  
35  
36 103. Kubota A, He F, Kawase M, Harata G, Hiramatsu M, Salminen S, Iino H. Lactobacillus strains  
37 stabilize intestinal microbiota in Japanese cedar pollinosis patients. *Microbiol Immunol*  
38  
39 2009;53(4):198-205.  
40  
41 104. Morelli L, Zonenschain D, Callegari ML, Grossi E, Maisano F, Fusillo M. Assessment of a new  
42 synbiotic preparation in healthy volunteers: survival, persistence of probiotic strains and its  
43  
44 effect on the indigenous flora. *Nutr J* 2003;2:11.  
45  
46 105. Sullivan A, Nord CE, Evengard B. Effect of supplement with lactic-acid producing bacteria on  
47  
48 fatigue and physical activity in patients with chronic fatigue syndrome. *Nutr J* 2009;8:1-6.  
49  
50 106. McNulty NP, Yatsunencko T, Hsiao A, Faith JJ, Muegge BD, Goodman AL, Henrissat B, Oozeer R,  
51  
52 Cools-Portier S, Gobert G, Chervaux C, Knights D, Lozupone CA, Knight R, Duncan AE, Bain  
53  
54  
55  
56  
57  
58  
59  
60



- 1  
2  
3 JR, Muehlbauer MJ, Newgard CB, Heath AC, Gordon JI. The impact of a consortium of  
4 fermented milk strains on the gut microbiome of gnotobiotic mice and monozygotic twins. *Sci*  
5 *Transl Med* 2011;3(106):106ra106.  
6  
7  
8  
9 107. Guarner F, Khan AG, Garisch J, Eliakim R, Gangl A, Thomson A, Krabshuis J, Lemair T,  
10 Kaufmann P, de Paula JA, Fedorak R, Shanahan F, Sanders ME, Szajewska H, Ramakrishna BS,  
11 Karakan T, Kim N; World Gastroenterology Organization. World Gastroenterology Organisation  
12 Global Guidelines: probiotics and prebiotics October 2011. *J Clin Gastroenterol*  
13 2012;46(6):468-81.  
14  
15  
16  
17 108. United States Department of Health and Human Services Food and Drug Administration, Center  
18 for Food Safety and Applied Nutrition. Dietary Supplements Guidance Documents and  
19 Regulatory Information. 2008. Available at:  
20 <http://www.fda.gov/food/guidanceregulation/guidancedocumentsregulatoryinformation/dietarysupplements/default.htm>. Accessed: May 29, 2014.  
21  
22  
23  
24  
25  
26 109. Barc MC, Charrin-Sarnel C, Rochet V, Bourlioux F, Sandré C, Boureau H, Doré J, Collignon A.  
27 Molecular analysis of the digestive microbiota in a gnotobiotic mouse model during antibiotic  
28 treatment: Influence of *Saccharomyces boulardii*. *Anaerobe* 2008;14(4):229-33.  
29  
30  
31 110. O'Hara AM, Shanahan F. The gut flora as a forgotten organ. *EMBO Reports* 2006;7:688-693.  
32  
33 111. Masood MI, Qadir MI, Shirazi JH, Khan IU. Beneficial effects of lactic acid bacteria on human  
34 beings. *Crit Rev Microbiol* 2011;37(1):91-8.  
35  
36  
37 112. Rijkers GT, de Vos WM, Brummer RJ, Morelli L, Corthier G, Marteau P. Health benefits and  
38 health claims of probiotics: bridging science and marketing. *Br J Nutr* 2011;106(9):1291-6.  
39  
40  
41  
42  
43  
44  
45  
46  
47  
48  
49  
50  
51  
52  
53  
54  
55  
56  
57  
58  
59  
60

1  
2  
3  
4  
5  
6  
7  
8  
9  
10  
11  
12  
13  
14  
15  
16 **Figure 1.** Time sequence of events and three models of study designs determining three different  
17  
18 degrees of dysbiosis correction by probiotics.  
19  
20  
21  
22  
23  
24  
25  
26  
27  
28  
29  
30  
31  
32  
33  
34  
35  
36  
37  
38  
39  
40  
41  
42  
43  
44  
45  
46  
47  
48  
49  
50  
51  
52  
53  
54  
55  
56  
57  
58  
59  
60

Peer review only

1  
2  
3  
4  
5  
6  
7  
8  
9  
10  
11  
12  
13  
14  
15  
16  
17  
18  
19  
20  
21  
22  
23  
24  
25  
26  
27  
28  
29  
30  
31  
32  
33  
34  
35  
36  
37  
38  
39  
40  
41  
42  
43  
44  
45  
46  
47  
48  
49  
50  
51  
52  
53  
54  
55  
56  
57  
58  
59  
60

**Figure 2.** Flow-chart of literature review results (1985-2013) of included and excluded studies for the restoration or improvement of normal microbiota by probiotics. Abbreviations: RCT, randomized-controlled trials; MOA, mechanism of action; NM, normal microbiota.

For peer review only

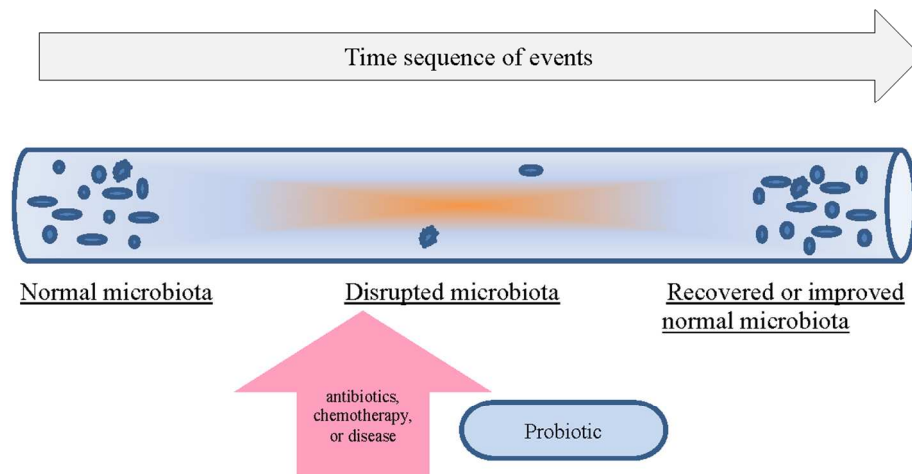

| Model | Type of population enrolled                | Dysbiosis at baseline | Time microbiota disrupted | Probiotic or control intervention | Potential outcomes  |
|-------|--------------------------------------------|-----------------------|---------------------------|-----------------------------------|---------------------|
| A     | Healthy volunteers or at-risk patients     | no                    | post-baseline             | preventive                        | restoration         |
| B     | Patients with active disease at enrollment | yes                   | pre-baseline              | treatment                         | altered or improved |
| C     | Healthy volunteers                         | no                    | not disrupted             | preventive                        | altered             |

Figure 1. Time sequence of events and three models of study designs determining three different degrees of dysbiosis correction by probiotics  
112x102mm (300 x 300 DPI)

only

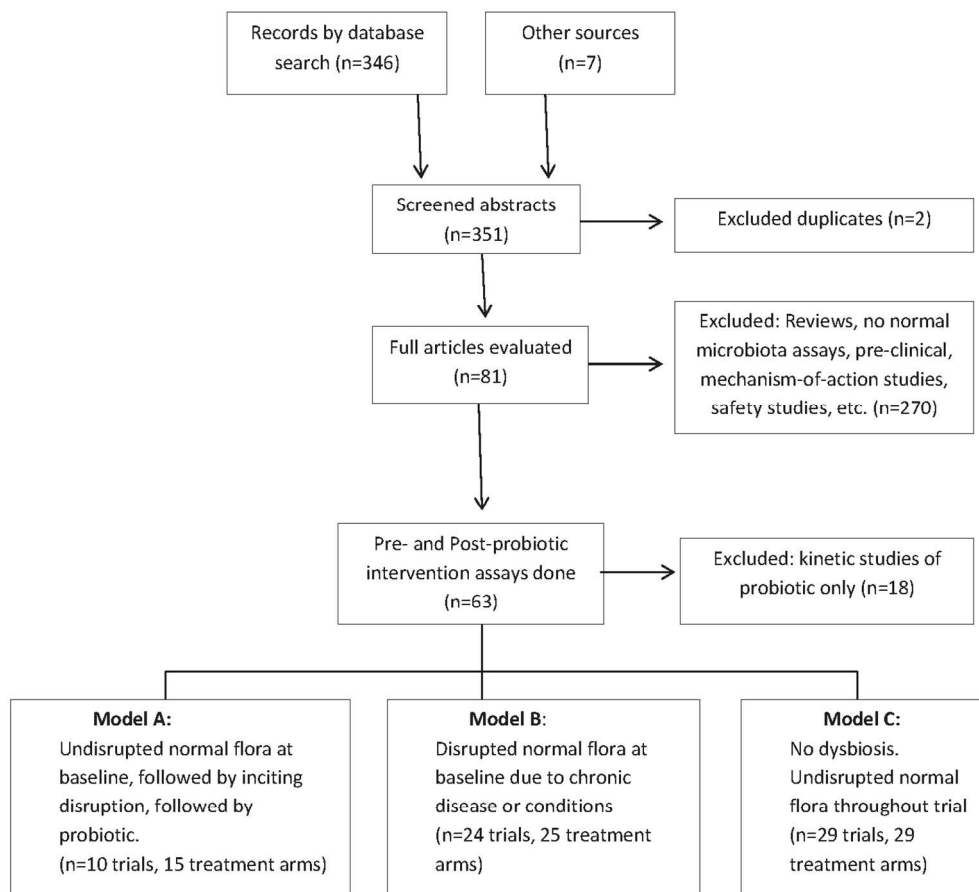

37  
38  
39  
40  
41  
42  
43  
44  
45  
46  
47  
48  
49  
50  
51  
52  
53  
54  
55  
56  
57  
58  
59  
60

Figure 2. Flow-chart of literature review results (1985-2013) of included and excluded studies for the restoration or improvement of normal microbiota by probiotics. Abbreviations: RCT, randomized-controlled trials; MOA, mechanism of action; NM, normal microbiota.  
125x113mm (300 x 300 DPI)

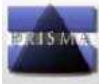

# PRISMA 2009 Checklist

1  
2  
3  
4  
5  
6  
7  
8  
9  
10  
11  
12  
13  
14  
15  
16  
17  
18  
19  
20  
21  
22  
23  
24  
25  
26  
27  
28  
29  
30  
31  
32  
33  
34  
35  
36  
37  
38  
39  
40  
41  
42  
43  
44  
45  
46  
47  
48  
49

| Section/topic             | # | Checklist item                                                                                                                                                                                                                                                                                                                                                                                                                                                                                                                                                                                                                                                                                                                                                                                                                                | Reported on page # |
|---------------------------|---|-----------------------------------------------------------------------------------------------------------------------------------------------------------------------------------------------------------------------------------------------------------------------------------------------------------------------------------------------------------------------------------------------------------------------------------------------------------------------------------------------------------------------------------------------------------------------------------------------------------------------------------------------------------------------------------------------------------------------------------------------------------------------------------------------------------------------------------------------|--------------------|
| <b>TITLE</b>              |   |                                                                                                                                                                                                                                                                                                                                                                                                                                                                                                                                                                                                                                                                                                                                                                                                                                               |                    |
| Title                     | 1 | Identify the report as a systematic review, meta-analysis, or both.<br><b>This is a systematic review</b>                                                                                                                                                                                                                                                                                                                                                                                                                                                                                                                                                                                                                                                                                                                                     | 1                  |
| <b>ABSTRACT</b>           |   |                                                                                                                                                                                                                                                                                                                                                                                                                                                                                                                                                                                                                                                                                                                                                                                                                                               |                    |
| Structured summary        | 2 | Provide a structured summary including, as applicable: background; objectives; data sources; study eligibility criteria, participants, and interventions; study appraisal and synthesis methods; results; limitations; conclusions and implications of key findings; systematic review registration number.                                                                                                                                                                                                                                                                                                                                                                                                                                                                                                                                   | 2                  |
| <b>INTRODUCTION</b>       |   |                                                                                                                                                                                                                                                                                                                                                                                                                                                                                                                                                                                                                                                                                                                                                                                                                                               |                    |
| Rationale                 | 3 | Describe the rationale for the review in the context of what is already known.<br><b>Probiotics are promising candidates to prevent or treat disease, but are typically supported by structure/function claims in most countries. The function claim for the restoration of normal microbiota is commonly cited in efficacy trials, but the evidence for this claim has not been examined systematically for all probiotic strains. Differences in study populations and study design effect the type of conclusions that can be drawn. This is the first systematic review and proof of principle of this type of analysis for the function claim of dysbiosis.</b>                                                                                                                                                                          | 4-5                |
| Objectives                | 4 | Provide an explicit statement of questions being addressed with reference to participants, interventions, comparisons, outcomes, and study design (PICOS).<br><b>A comprehensive literature review of the evidence from randomized controlled trials will discuss the strength of the evidence for the restoration or improvement of dysbiosis by specific probiotic strain. The interventions include probiotic or control (typically placebo) given for a specific time enrolled in clinical trials for either the prevention or treatment of disease. All trials which stated some impact on the normal microbiota will be reviewed and analyzed for the ability to document changes in the normal microbiota. The outcomes are the degree of dysbiosis restoration depending upon the study design and type of enrolled participants.</b> | 5                  |
| <b>METHODS</b>            |   |                                                                                                                                                                                                                                                                                                                                                                                                                                                                                                                                                                                                                                                                                                                                                                                                                                               |                    |
| Protocol and registration | 5 | Indicate if a review protocol exists, if and where it can be accessed (e.g., Web address), and, if available, provide registration information including registration number.<br><b>Review protocol is described in Methods section of paper.<br/>Prospero registration number is: CRD42014007224</b>                                                                                                                                                                                                                                                                                                                                                                                                                                                                                                                                         | 5-9                |
| Eligibility criteria      | 6 | Specify study characteristics (e.g., PICOS, length of follow-up) and report characteristics (e.g., years considered, language, publication status) used as criteria for eligibility, giving rationale.<br><b>Participants: without restriction, any enrolled in clinical trial (adults and pediatrics)</b>                                                                                                                                                                                                                                                                                                                                                                                                                                                                                                                                    | 6                  |



# PRISMA 2009 Checklist

1  
2  
3  
4  
5  
6  
7  
8  
9  
10  
11  
12  
13  
14  
15  
16  
17  
18  
19  
20  
21  
22  
23  
24  
25  
26  
27  
28  
29  
30  
31  
32  
33  
34  
35  
36  
37  
38  
39  
40  
41  
42  
43  
44  
45  
46  
47  
48  
49

|                         |    |                                                                                                                                                                                                                                                                                                                                                                                                                                                                                                                                                                                                                                                                                                                                                                                                                               |     |
|-------------------------|----|-------------------------------------------------------------------------------------------------------------------------------------------------------------------------------------------------------------------------------------------------------------------------------------------------------------------------------------------------------------------------------------------------------------------------------------------------------------------------------------------------------------------------------------------------------------------------------------------------------------------------------------------------------------------------------------------------------------------------------------------------------------------------------------------------------------------------------|-----|
|                         |    | <p><b>Interventions: all probiotics</b><br/> <b>Comparisons: controlled (typically placebo)</b><br/> <b>Outcomes: microbiologic assays of the intestinal flora or microbiota</b><br/> <b>Study design: required to have pre-intervention (baseline) and post-intervention microbiological assays</b><br/> <b>Length of follow-up: unrestricted</b><br/> <b>Language: unrestricted</b><br/> <b>Publication and years considered: peer-reviewed publications from PubMed (1985-2013, unless otherwise noted), EMBASE, Cochrane Database (1990-2013), CINAHL, AMED, ISI Web of Science (2000-2013). On-line trial registries: (Cochrane Central Register of Controlled trials, MetaRegister of Controlled Trials, and National Institutes of Health.</b></p>                                                                     |     |
| Information sources     | 7  | <p>Describe all information sources (e.g., databases with dates of coverage, contact with study authors to identify additional studies) in the search and date last searched.</p> <p><b>See item above</b></p>                                                                                                                                                                                                                                                                                                                                                                                                                                                                                                                                                                                                                | 6   |
| Search                  | 8  | <p>Present full electronic search strategy for at least one database, including any limits used, such that it could be repeated.</p> <p><b>All probiotics + health claims, structure/function claims, normal microbiota, normal intestinal flora, dysbiosis, pharmacokinetics, metagenomics, dietary supplements, randomized controlled trials, antibiotic-associated diarrhea, Clostridium difficile infections, H. pylori treatments, inflammatory bowel disease, irritable bowel disease, travelers diarrhea, bacterial vaginosis or vaginitis, treatment of pediatric acute diarrhea, healthy volunteer trials and specific probiotic strains. (PubMed)</b></p>                                                                                                                                                           | 5-6 |
| Study selection         | 9  | <p>State the process for selecting studies (i.e., screening, eligibility, included in systematic review, and, if applicable, included in the meta-analysis).</p> <p><b>Screening:</b><br/> <b>Eligibility: Must have at least one pre-intervention (baseline) microbiological assay of normal flora or metagenomic analysis and one post-intervention (post-probiotic) assay. Genus and species of probiotic strain(s) provided. Normal microbiota assayed during a randomized, controlled trial.</b><br/> <b>Excluded: pre-clinical studies, safety studies, reviews, mechanism of action studies, case reports or case series, duplicate reports, unspecified type of probiotics.</b></p>                                                                                                                                   | 6-7 |
| Data collection process | 10 | <p>Describe method of data extraction from reports (e.g., piloted forms, independently, in duplicate) and any processes for obtaining and confirming data from investigators.</p> <p><b>Pilot data extraction form used modified from standard meta-analysis data extraction form (McFarland and Goh 2013, World J Gastroenterol). Questionable results were queried from original authors of papers.</b></p>                                                                                                                                                                                                                                                                                                                                                                                                                 | 6   |
| Data items              | 11 | <p>List and define all variables for which data were sought (e.g., PICOS, funding sources) and any assumptions and simplifications made.</p> <p><b>The timing and type of microbiologic assays of intestinal or vaginal microbiota were collected. As the literature review has a length inclusion period (1985-2013), the types of microbiologic assays have evolved, but all types were included from basic microbiologic assays to metagenomic profiling. The type of probiotic intervention was collected by genus, species and strain (if stated in paper). Types of normal microbiota assays varied by technique. The patient population (healthy volunteers, acute disease or chronic disease) was also collected. Also collected: study size, type of disruptive factor, follow-up duration, stated claims in</b></p> | 7-8 |

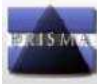

## PRISMA 2009 Checklist

|                                    |    |                                                                                                                                                                                                                                                                                                                                                                                                                                       |    |
|------------------------------------|----|---------------------------------------------------------------------------------------------------------------------------------------------------------------------------------------------------------------------------------------------------------------------------------------------------------------------------------------------------------------------------------------------------------------------------------------|----|
|                                    |    | paper.                                                                                                                                                                                                                                                                                                                                                                                                                                |    |
| Risk of bias in individual studies | 12 | Describe methods used for assessing risk of bias of individual studies (including specification of whether this was done at the study or outcome level), and how this information is to be used in any data synthesis.<br><b>Quality of study design (restoration, improvement or no dysbiosis) was used when assessing quality of individual studies. These were then analyzed by stratification on the quality of study design.</b> | 8  |
| Summary measures                   | 13 | State the principal summary measures (e.g., risk ratio, difference in means).<br><b>NA, No pooled RR or DWMs used in this systematic review.</b>                                                                                                                                                                                                                                                                                      | na |
| Synthesis of results               | 14 | Describe the methods of handling data and combining results of studies, if done, including measures of consistency (e.g., $I^2$ ) for each meta-analysis.<br><b>NA, No pooled RR or DWMs used in this systematic review.</b>                                                                                                                                                                                                          | na |

Page 1 of 2

| Section/topic                 | #  | Checklist item                                                                                                                                                                                                                                                                               | Reported on page # |
|-------------------------------|----|----------------------------------------------------------------------------------------------------------------------------------------------------------------------------------------------------------------------------------------------------------------------------------------------|--------------------|
| Risk of bias across studies   | 15 | Specify any assessment of risk of bias that may affect the cumulative evidence (e.g., publication bias, selective reporting within studies).<br><b>All studies with microbiota were included to limit bias, but no measurement for publication bias was done for this systematic review.</b> | 8                  |
| Additional analyses           | 16 | Describe methods of additional analyses (e.g., sensitivity or subgroup analyses, meta-regression), if done, indicating which were pre-specified.<br><b>association of degree of dysbiosis correction with clinical efficacy by probiotic strain(s)</b>                                       | 8-9                |
| <b>RESULTS</b>                |    |                                                                                                                                                                                                                                                                                              |                    |
| Study selection               | 17 | Give numbers of studies screened, assessed for eligibility, and included in the review, with reasons for exclusions at each stage, ideally with a flow diagram.<br><b>See flow diagram, Figure 2.</b>                                                                                        | 25                 |
| Study characteristics         | 18 | For each study, present characteristics for which data were extracted (e.g., study size, PICOS, follow-up period) and provide the citations.<br><b>Extracted data were cited in tables. See paper-Tables 1-4.</b>                                                                            | 26-32              |
| Risk of bias within studies   | 19 | Present data on risk of bias of each study and, if available, any outcome level assessment (see item 12).<br><b>Presented in Discussion section.</b>                                                                                                                                         | 11-15              |
| Results of individual studies | 20 | For all outcomes considered (benefits or harms), present, for each study: (a) simple summary data for each intervention group (b) effect estimates and confidence intervals, ideally with a forest plot.<br><b>Cited in Tables 1-4.</b>                                                      | 26-32              |
| Synthesis of results          | 21 | Present results of each meta-analysis done, including confidence intervals and measures of consistency.<br><b>NA, this is a systematic review, not a meta-analysis.</b>                                                                                                                      | na                 |
| Risk of bias across studies   | 22 | Present results of any assessment of risk of bias across studies (see item 15).<br><small>For peer review only: <a href="http://bmjopen.bmj.com/site/about/guidelines.xhtml">http://bmjopen.bmj.com/site/about/guidelines.xhtml</a></small>                                                  | 18-19              |



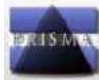

# PRISMA 2009 Checklist

1  
2  
3  
4  
5  
6  
7  
8  
9  
10  
11  
12  
13  
14  
15  
16  
17  
18  
19  
20  
21  
22  
23  
24  
25  
26  
27  
28  
29  
30  
31  
32  
33  
34  
35  
36  
37  
38  
39  
40  
41  
42  
43  
44  
45  
46  
47  
48  
49

|                     |    |                                                                                                                                                                                                                                                                                                                                                                                                                        |        |
|---------------------|----|------------------------------------------------------------------------------------------------------------------------------------------------------------------------------------------------------------------------------------------------------------------------------------------------------------------------------------------------------------------------------------------------------------------------|--------|
|                     |    | <b>Presented in Discussion section (bias due to study design).</b>                                                                                                                                                                                                                                                                                                                                                     |        |
| Additional analysis | 23 | Give results of additional analyses, if done (e.g., sensitivity or subgroup analyses, meta-regression [see Item 16]).                                                                                                                                                                                                                                                                                                  | 15-17  |
| <b>DISCUSSION</b>   |    |                                                                                                                                                                                                                                                                                                                                                                                                                        |        |
| Summary of evidence | 24 | Summarize the main findings including the strength of evidence for each main outcome; consider their relevance to key groups (e.g., healthcare providers, users, and policy makers).<br><b>Strength of the evidence is provided in the Results section.</b><br><b>Relevance to key groups is in the Discussion section.</b>                                                                                            | 19, 22 |
| Limitations         | 25 | Discuss limitations at study and outcome level (e.g., risk of bias), and at review-level (e.g., incomplete retrieval of identified research, reporting bias).<br><b>Provided in Discussion section and “Opportunities for Future Research” section and ‘Strengths and Weaknesses” section.</b>                                                                                                                         | 21-22  |
| Conclusions         | 26 | Provide a general interpretation of the results in the context of other evidence, and implications for future research.<br><b>The weight of the evidence for the function claim that probiotics can improve or restore normal microbiota is strong for a few probiotic strains, but in general, more confirmatory studies that are properly timed and designed are required for the majority of probiotic strains.</b> | 20-21  |
| <b>FUNDING</b>      |    |                                                                                                                                                                                                                                                                                                                                                                                                                        |        |
| Funding             | 27 | Describe sources of funding for the systematic review and other support (e.g., supply of data); role of funders for the systematic review.<br><b>This review was unfunded.</b>                                                                                                                                                                                                                                         | 23     |

From: Moher D, Liberati A, Tetzlaff J, Altman DG, The PRISMA Group (2009). Preferred Reporting Items for Systematic Reviews and Meta-Analyses: The PRISMA Statement. PLoS Med 6(6): e1000097. doi:10.1371/journal.pmed1000097

For more information, visit: [www.prisma-statement.org](http://www.prisma-statement.org).
